# Supplementary material
Source: publisher figshare collection journal article supplement (https://acs.figshare.com/ndownloader/files/4775353)

# Supporting Information

## The Journal of Organic Chemistry

### Synthesis and Biological Evaluation of Aromatic Analogues of Conduritol F, L-*chiro*-Inositol and Dihydroconduritol F Structurally Related to the Amaryllidaceae Anticancer Constituents

Artem S. Kireev, Oleg N. Nadein, Vincent J. Agustin, Nancy E. Bush, Antonio Evidente, Madhuri Manpadi, Marcia A. Ogasawara, Shiva K. Rastogi, Snezna Rogelj, Scott T. Shors and Alexander Kornienko\*

*Departments of Chemistry and Biology, New Mexico Institute of Mining and Technology, Socorro, New Mexico 87801, USA, and Dipartimento di Scienze del Suolo, della Pianta e dell'Ambiente, Università di Napoli Federico II, 80055 Napoli, Italy*

akornien@nmt.edu

#### Table of contents

|                                                                                                                                                                     |            |
|---------------------------------------------------------------------------------------------------------------------------------------------------------------------|------------|
| 1. General Methods                                                                                                                                                  | S1         |
| 2. Copies of <sup>1</sup> H and <sup>13</sup> C NMR spectra for compound <b>12-21</b> , <b>8e</b> , <b>27a-g</b> , <b>28a-g</b> , <b>29a-g</b> , and <b>30a-g</b> . | S2 – S81   |
| 3. Copies of <sup>1</sup> H, <sup>13</sup> C NMR, NOESY, and NOE difference spectra for compound <b>31</b> .                                                        | S82 – S87  |
| 4. Copies of <sup>1</sup> H and <sup>13</sup> C NMR spectra for compound <b>8a-e</b> , <b>9a-e</b> and <b>10a-e</b> .                                               | S88 – S117 |
| 5. References                                                                                                                                                       | S118       |

**General Methods.** Unless otherwise noted all commercially obtained reagents were used without purification. THF was distilled from sodium-benzophenone ketyl prior to use. Dichloromethane and methanol were distilled from calcium hydride. Reactions were carried out under a nitrogen atmosphere in oven-dried glassware using standard syringe, cannula and septa techniques. Reactions were monitored by TLC (Silica Gel 60 F<sub>254</sub>, 250 μm) and visualized with UV light and ceric ammonium molybdate solution. Flash chromatography was performed on silica gel (32-63 μm, 60 Å pore size). Aryl bromides **c**<sup>1</sup> and **e**,<sup>2,3</sup> and MOMCl<sup>4</sup> were prepared as previously described.

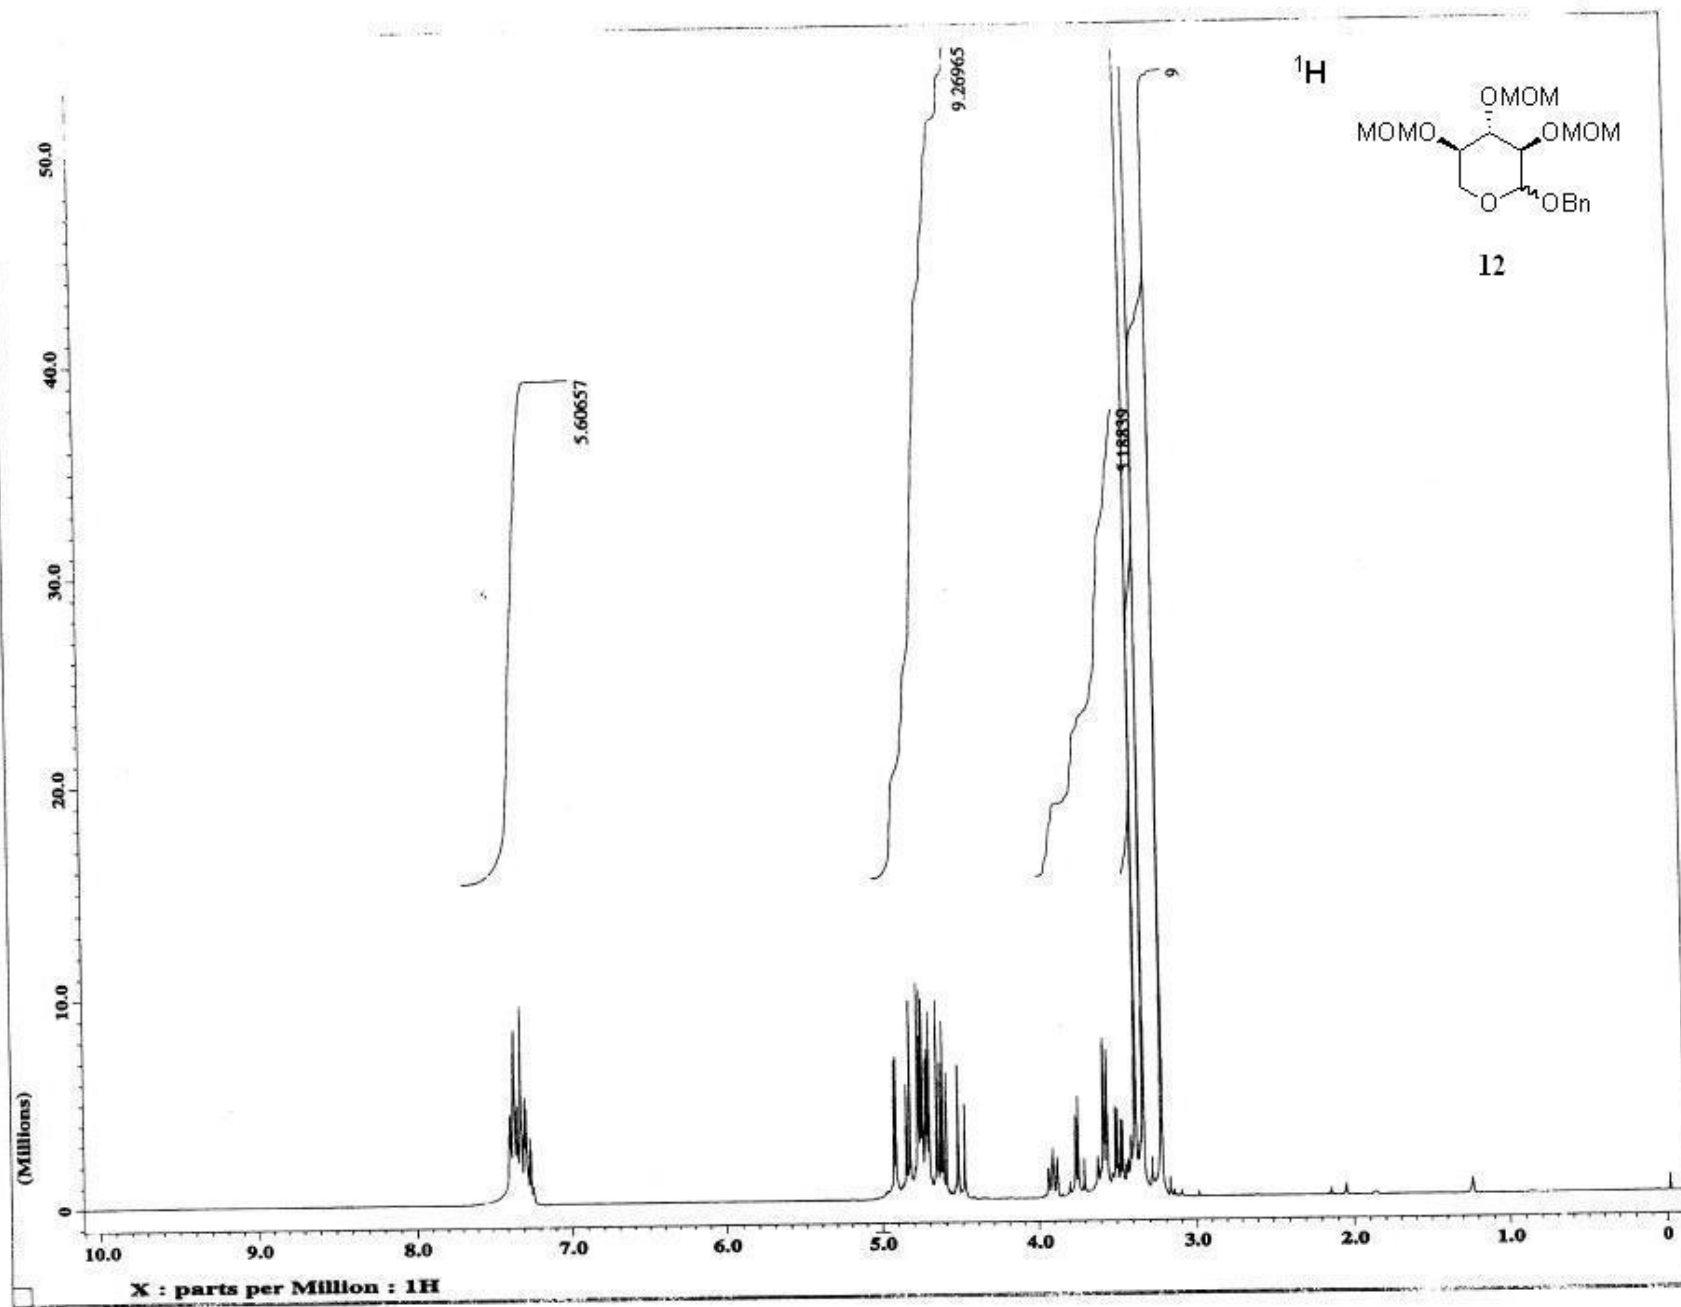

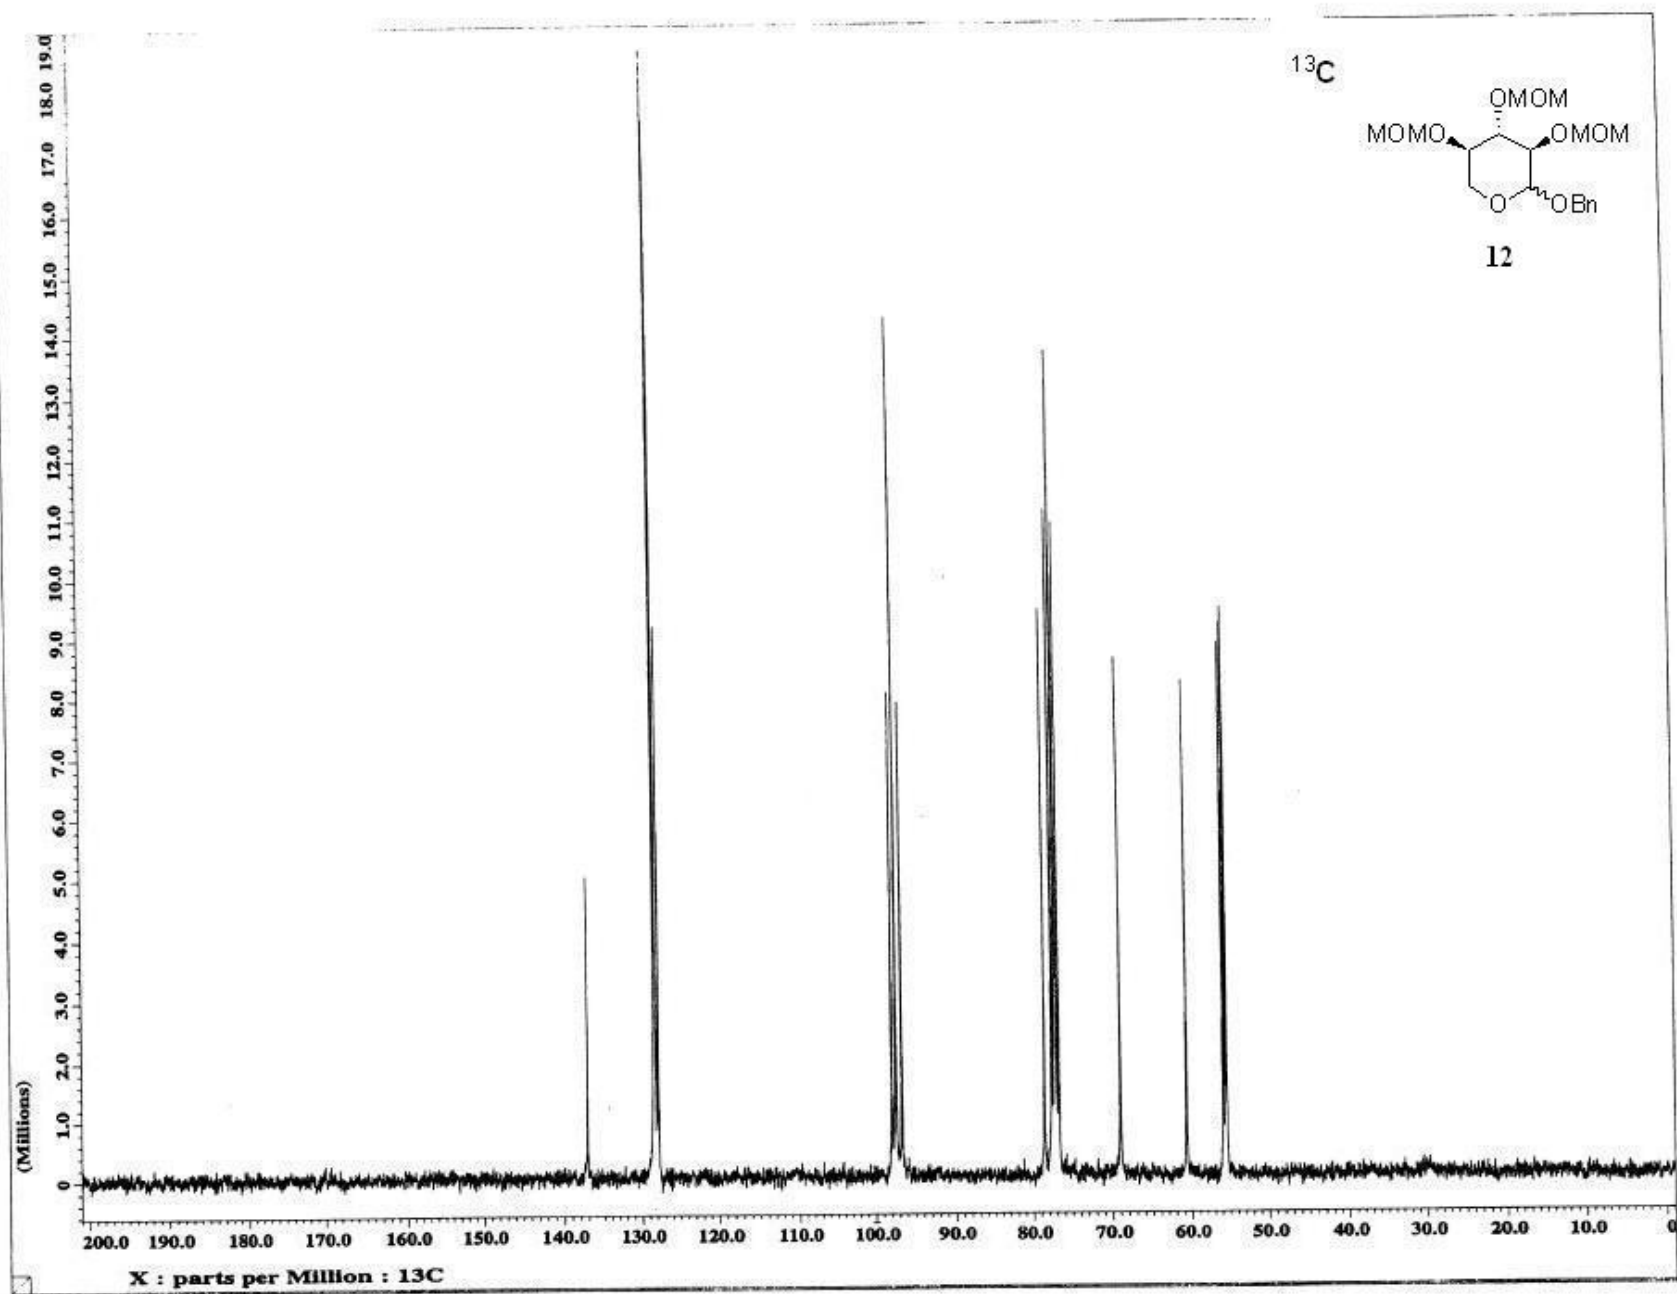

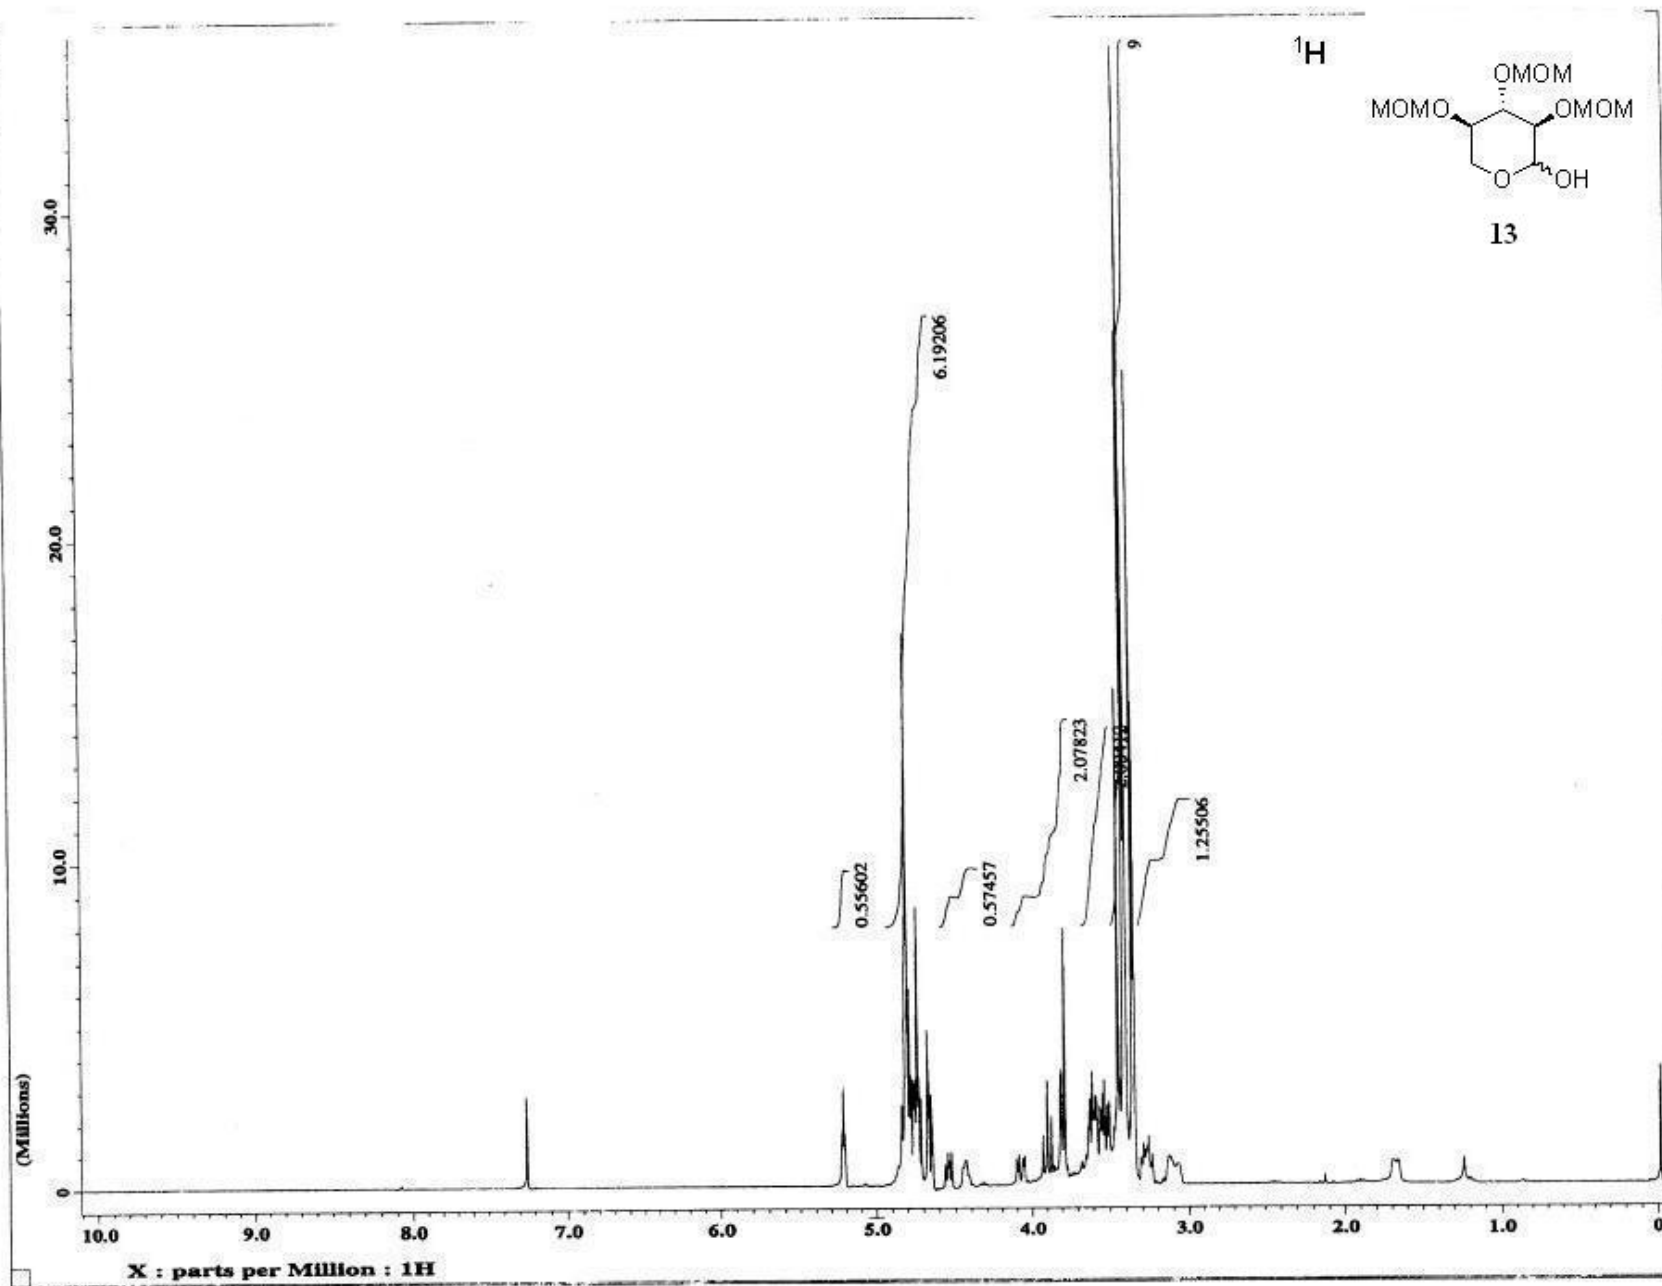

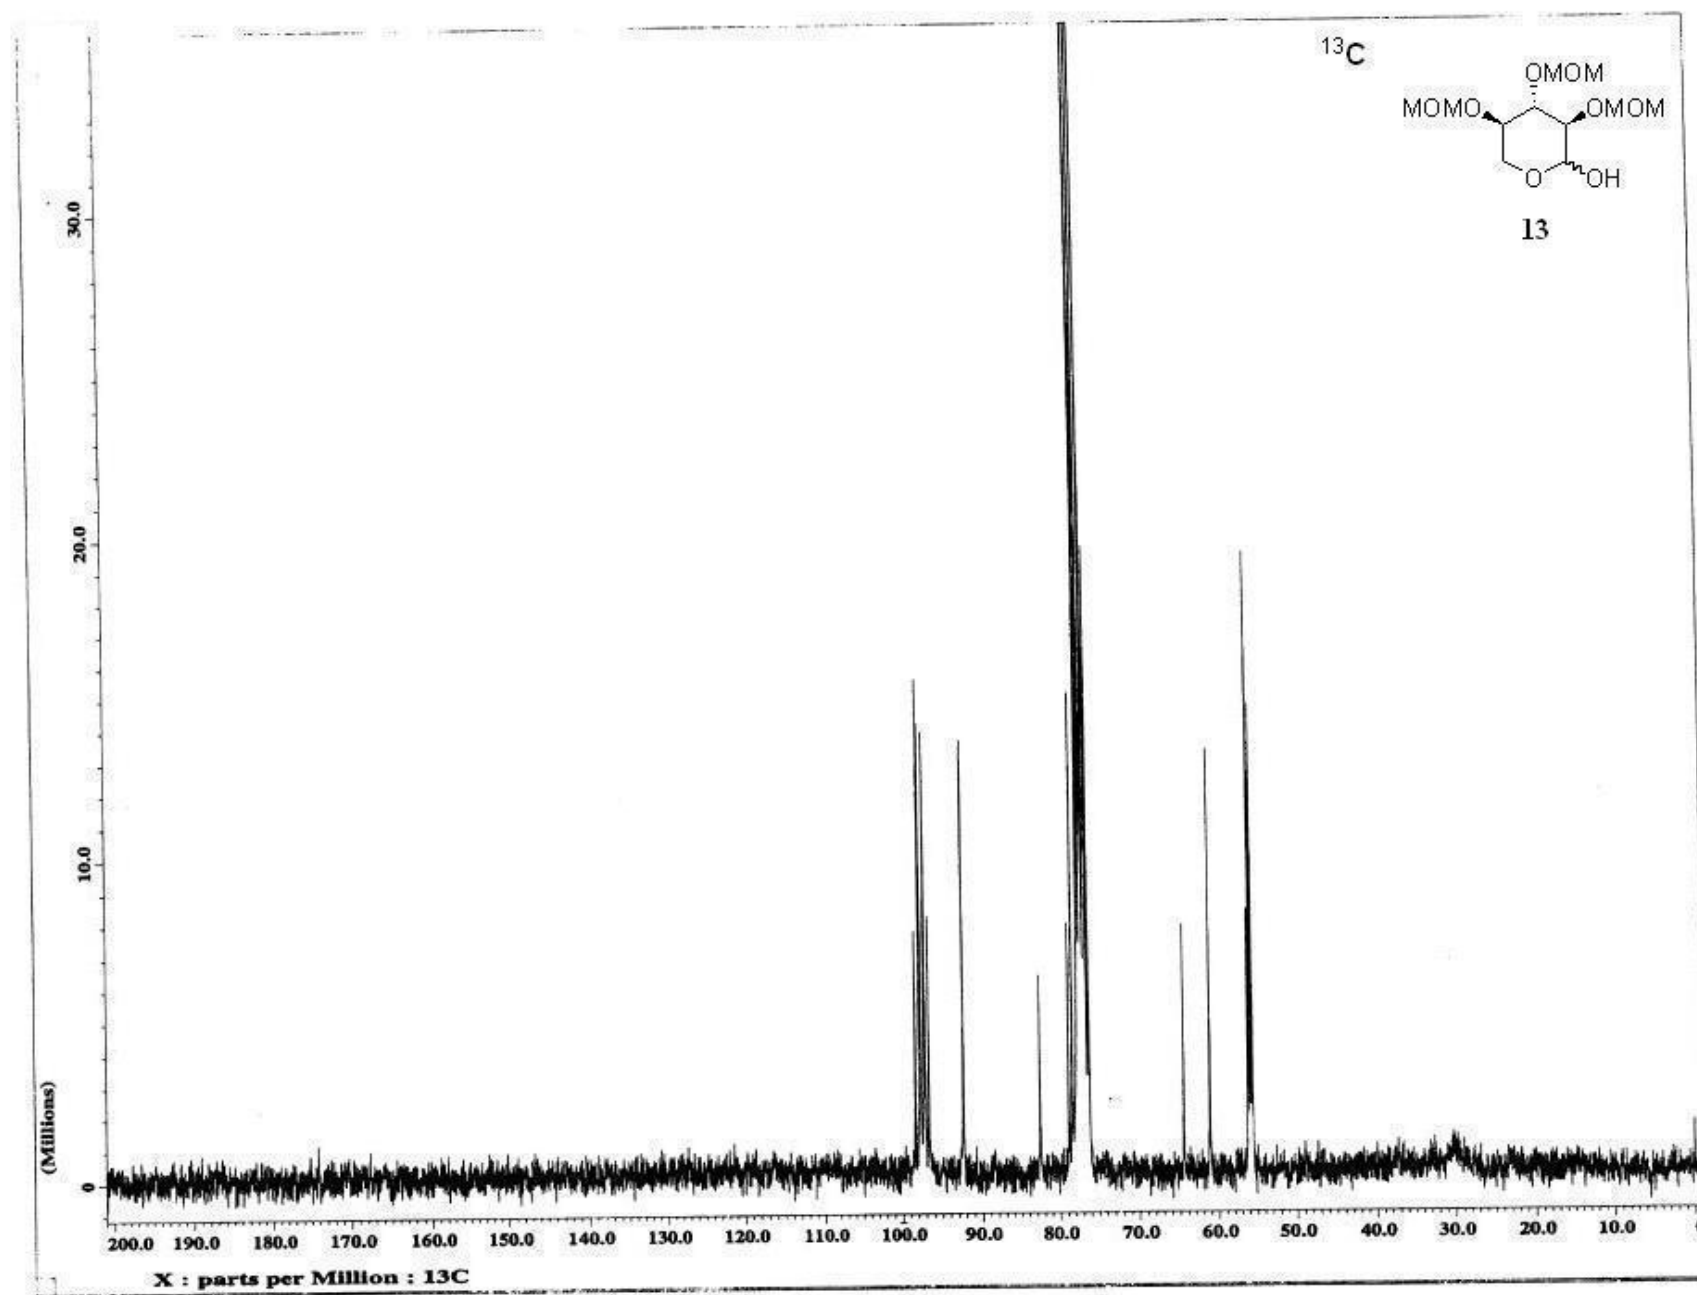



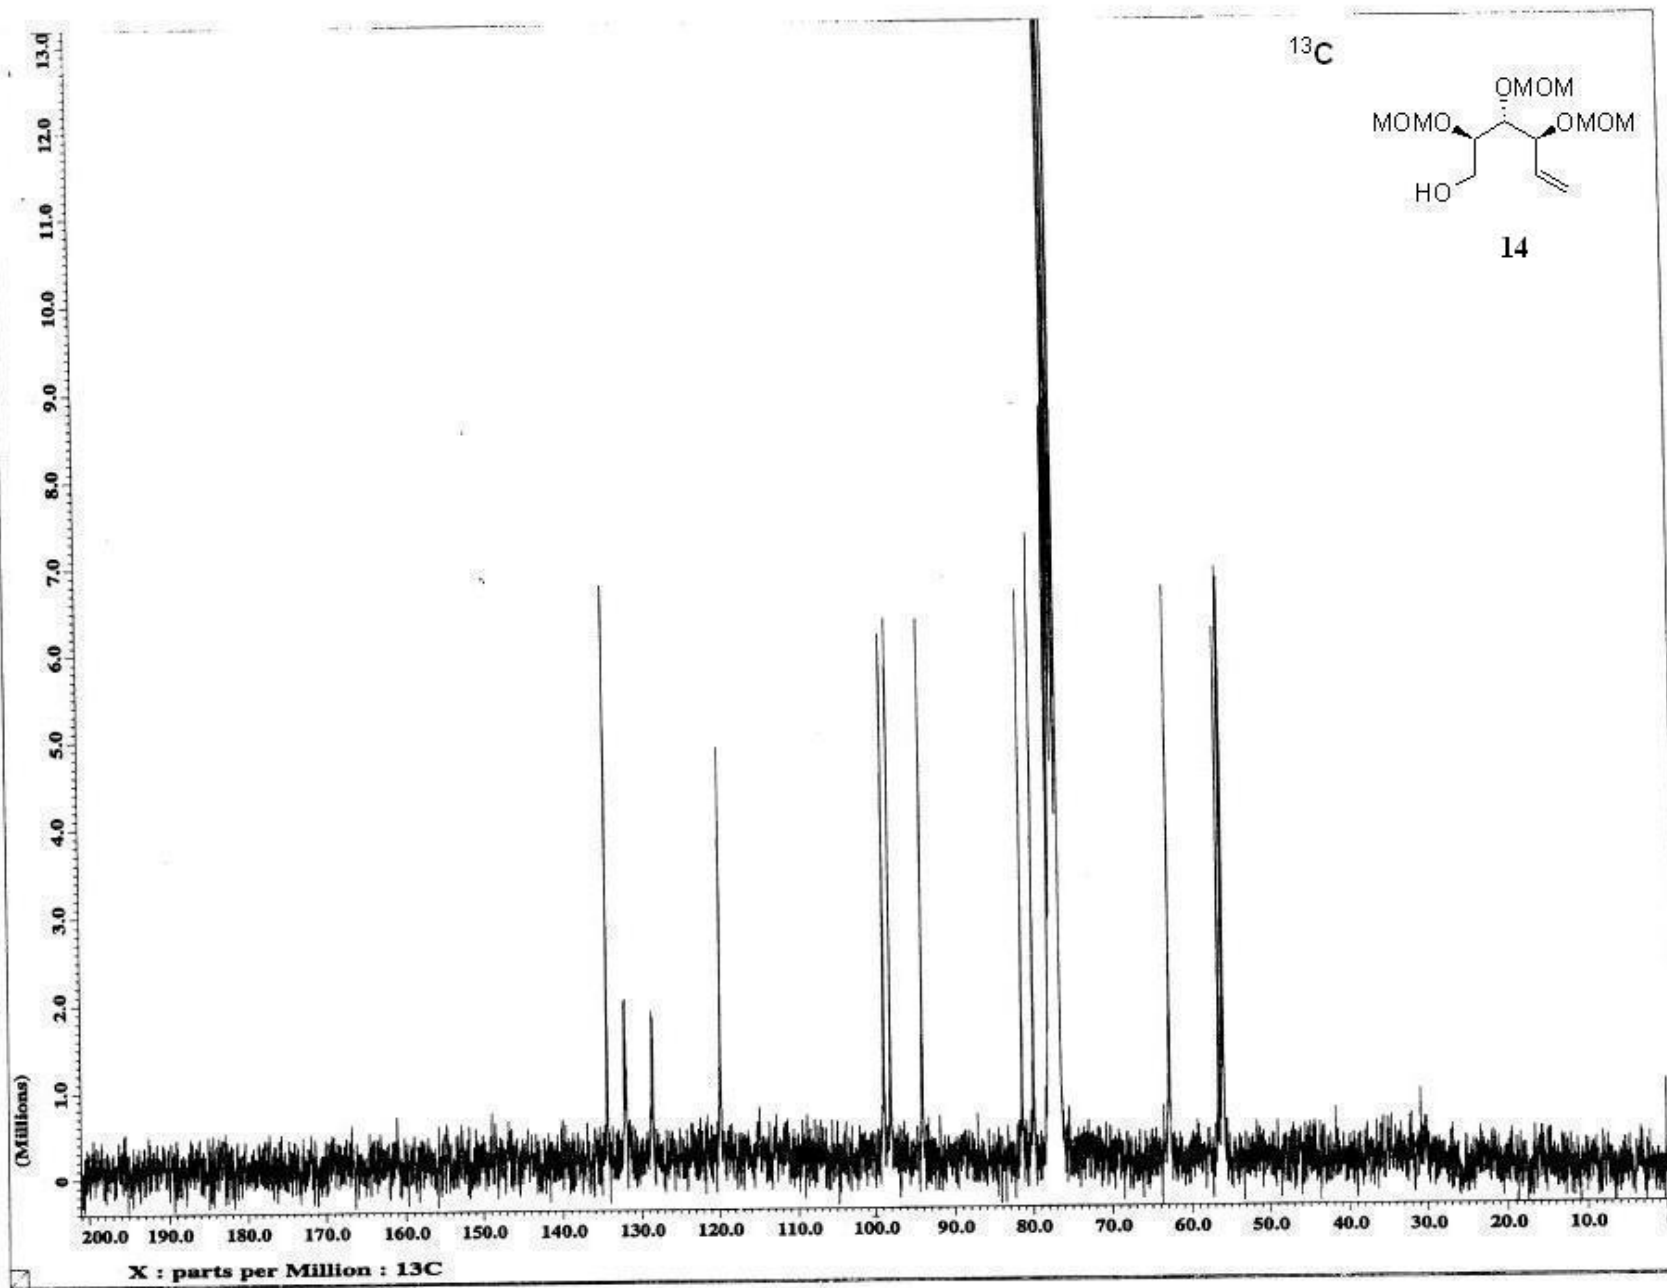

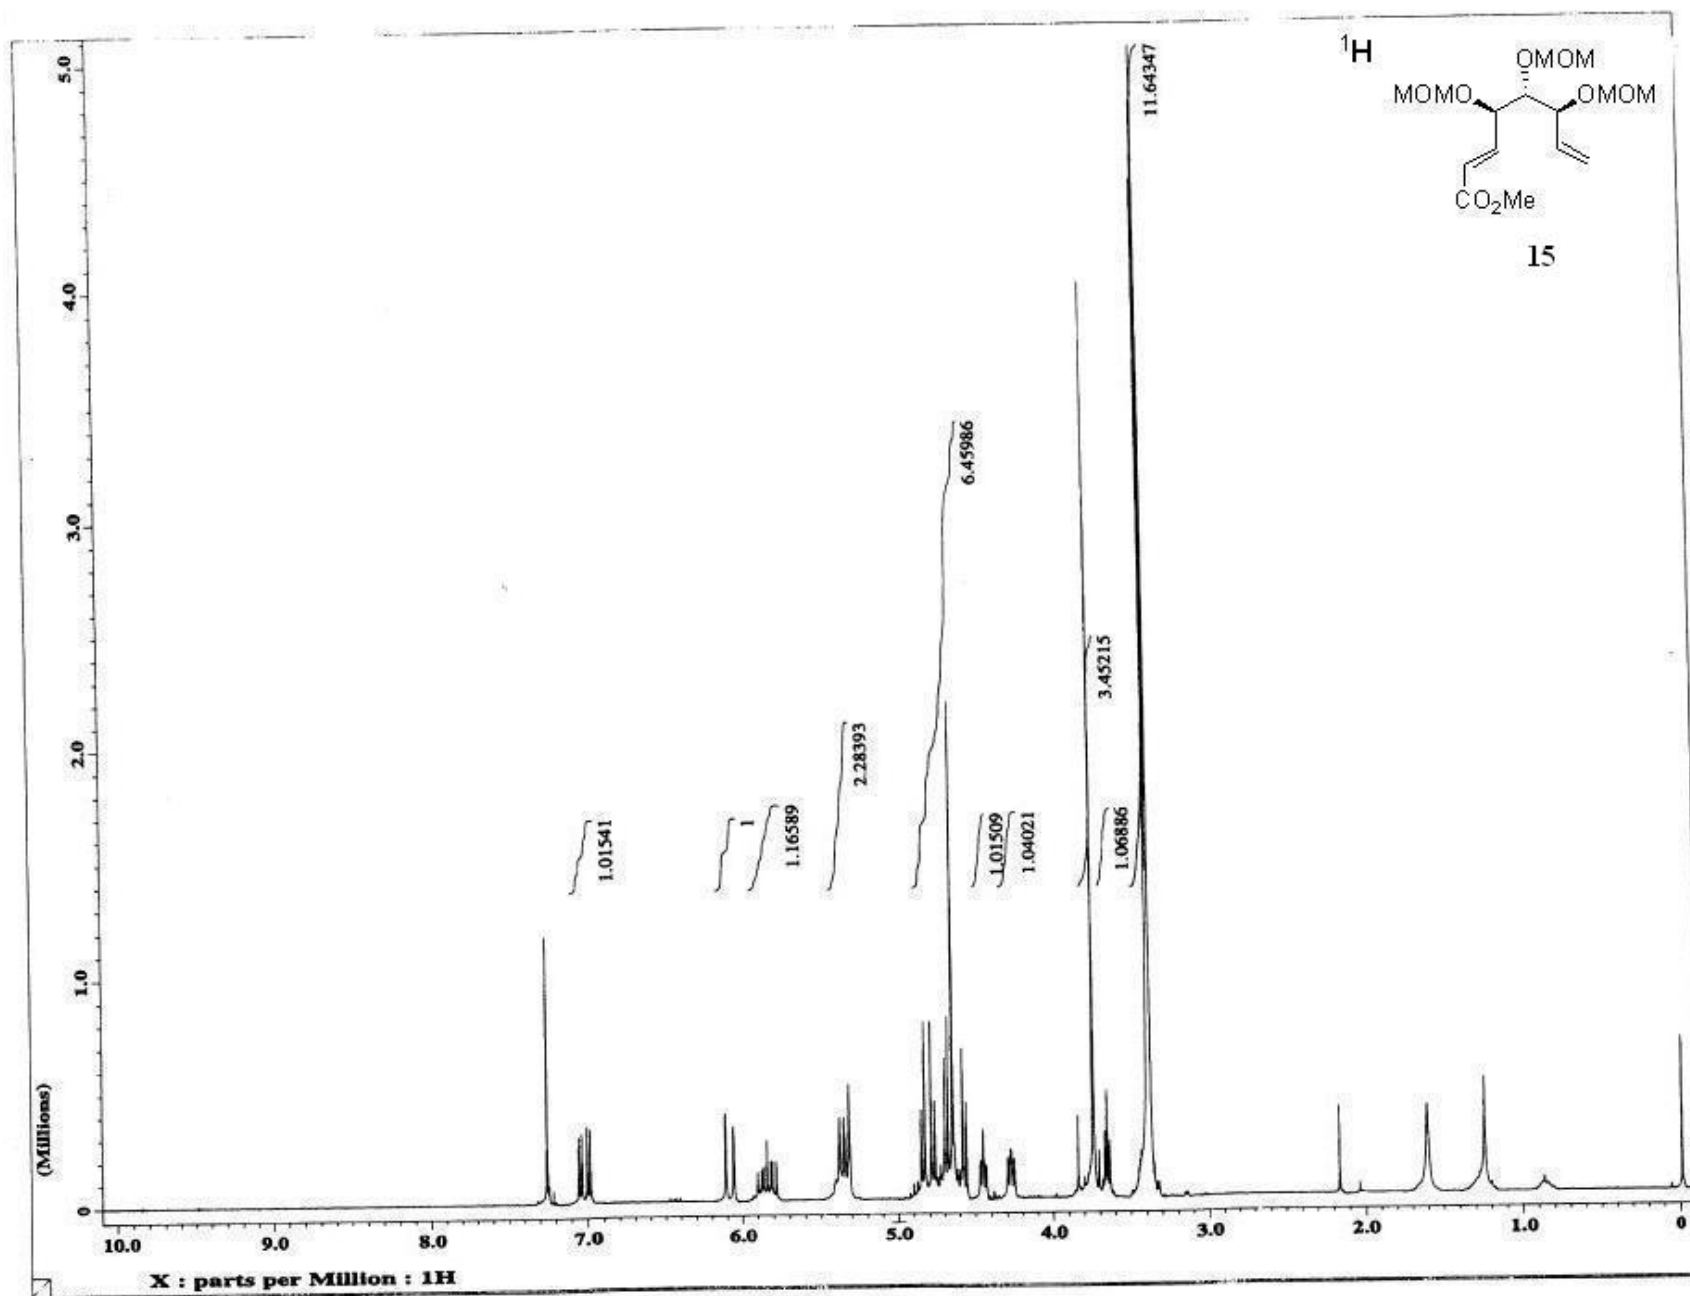



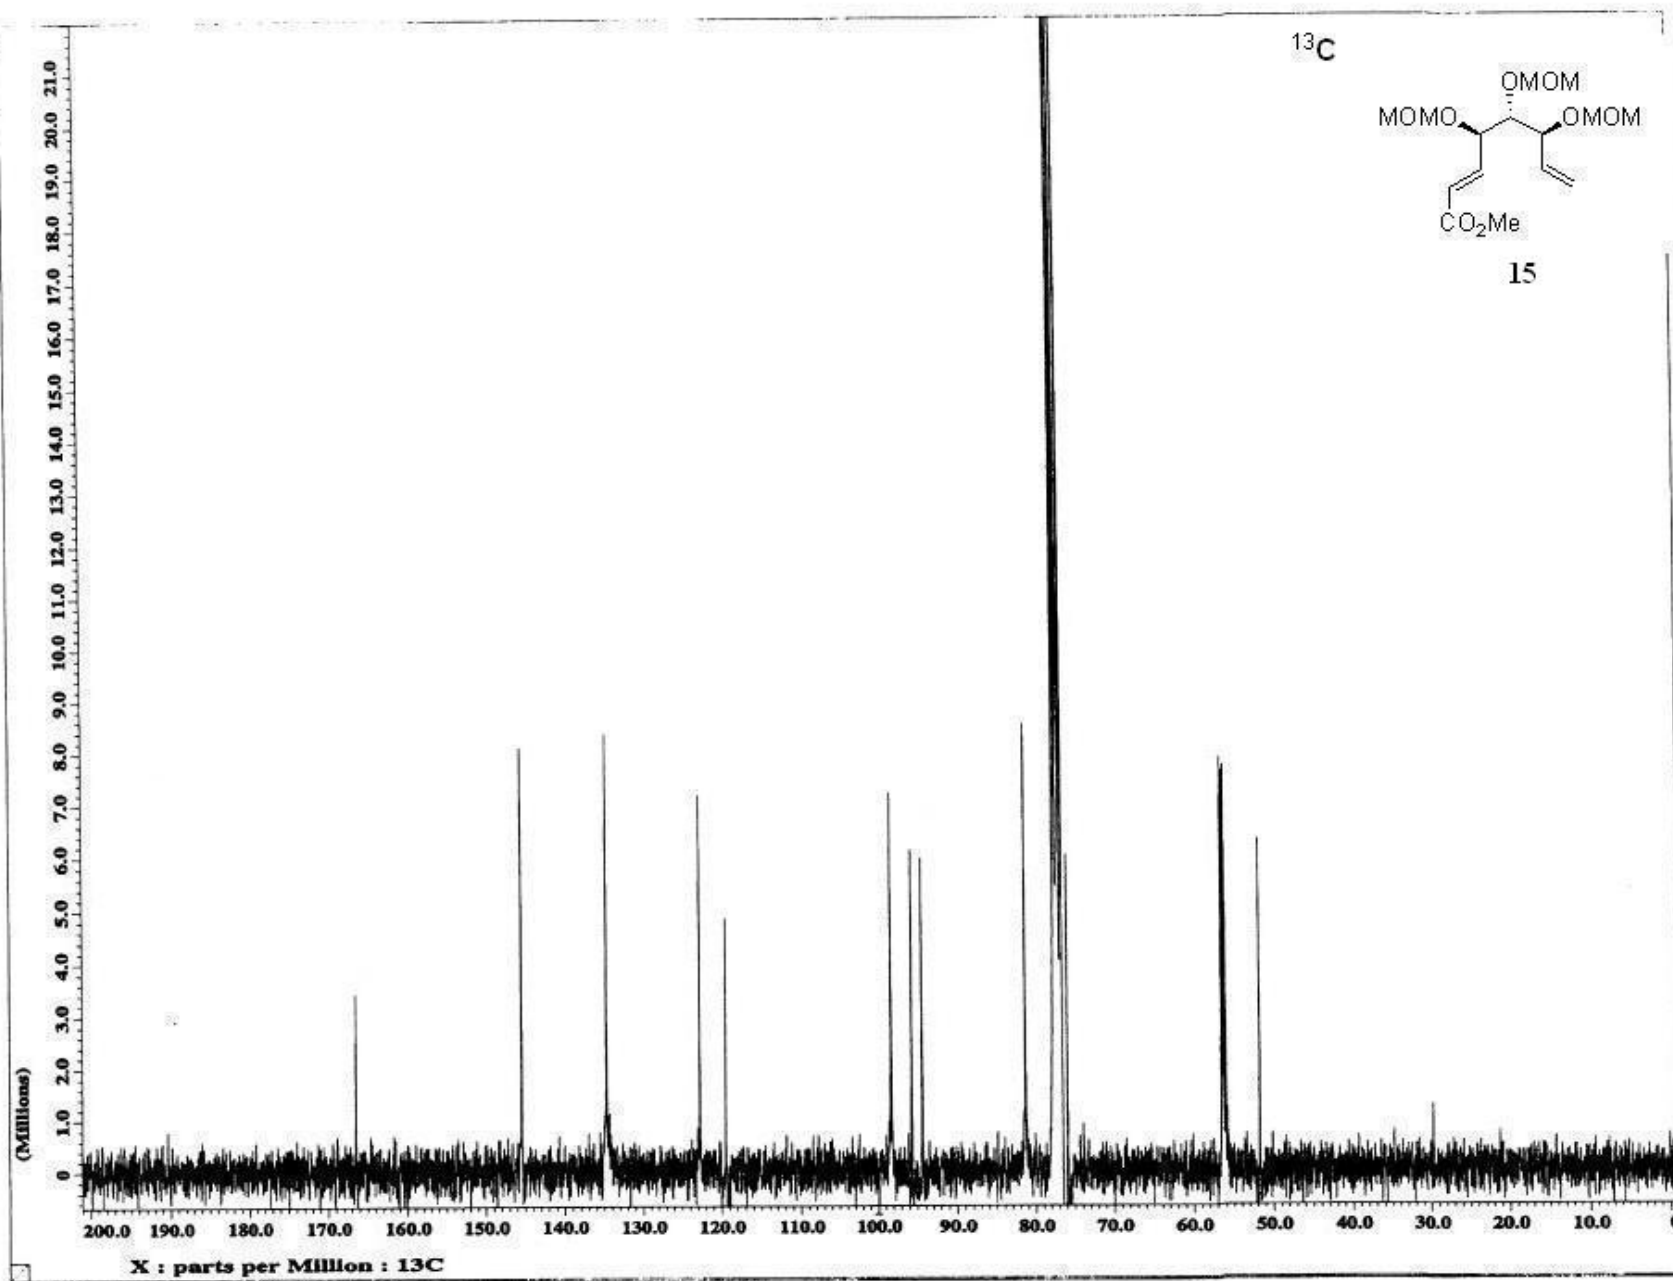

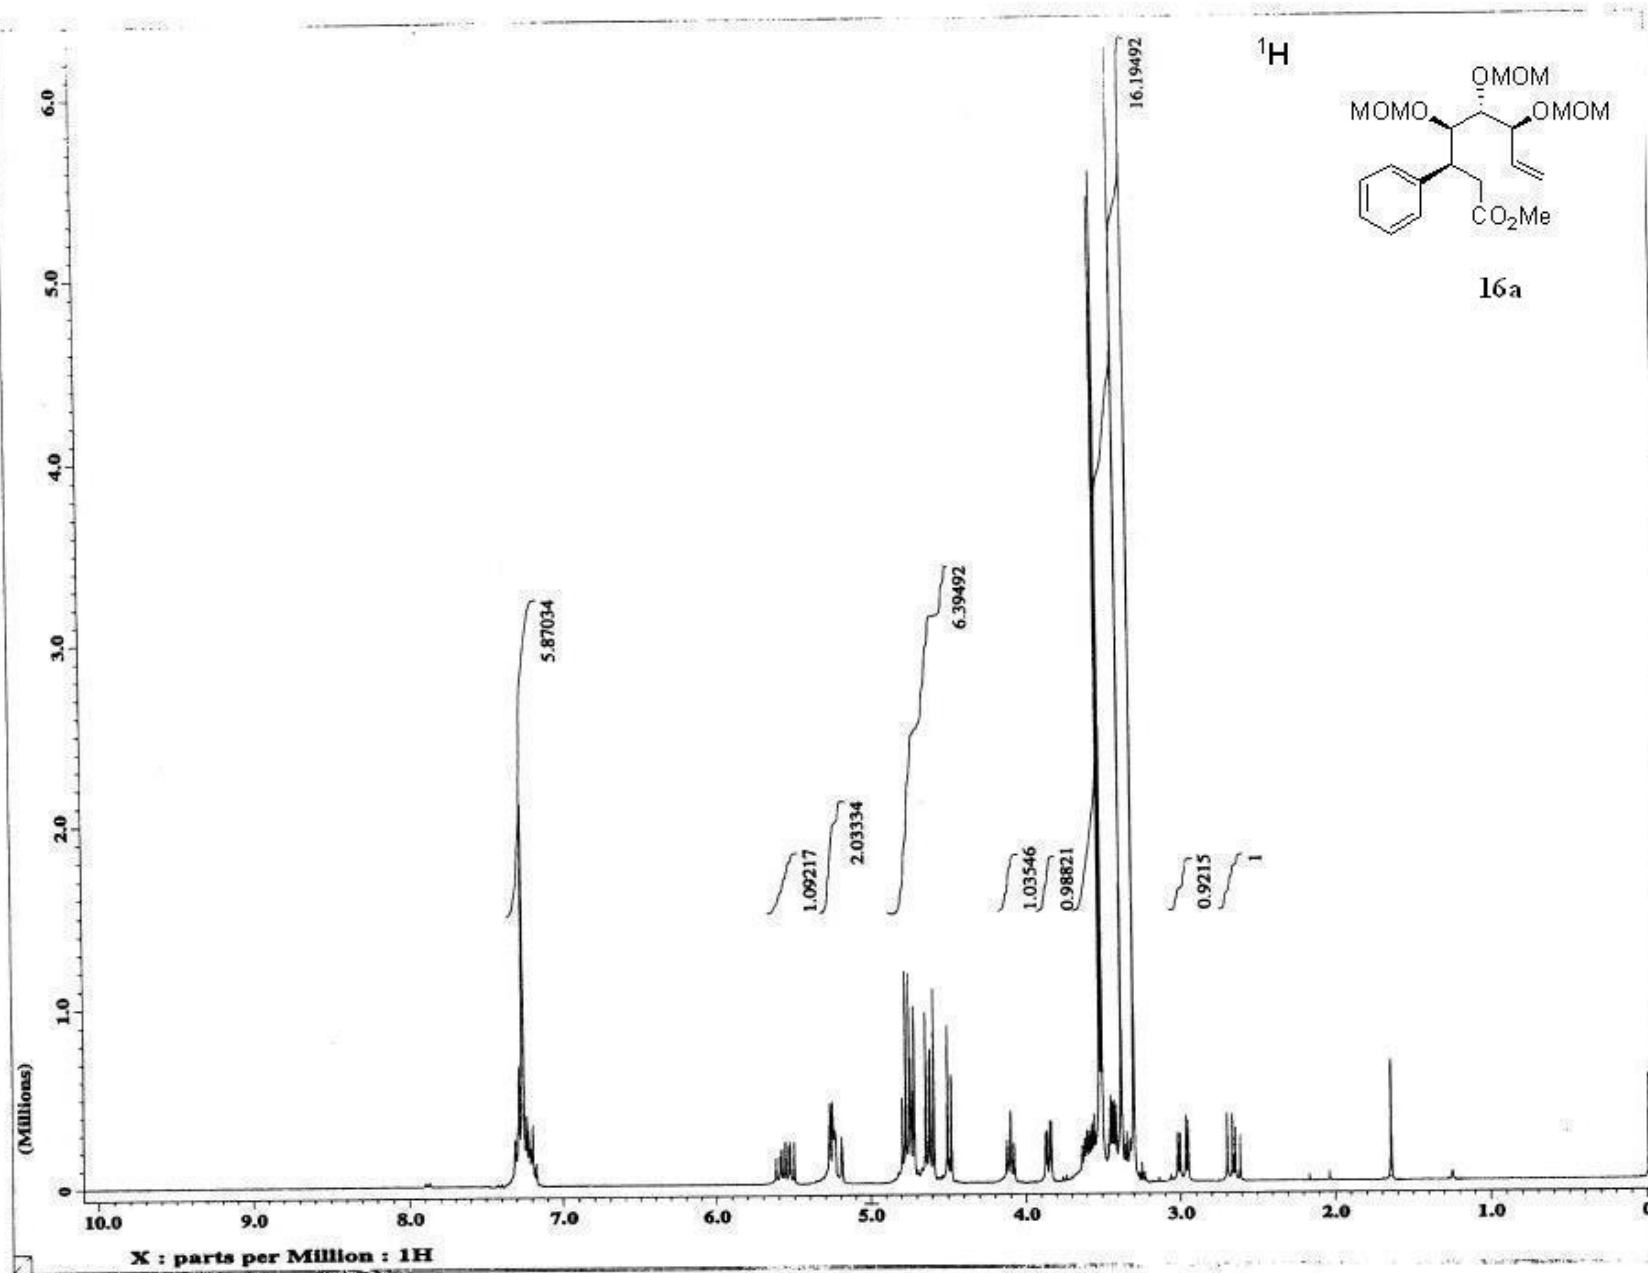

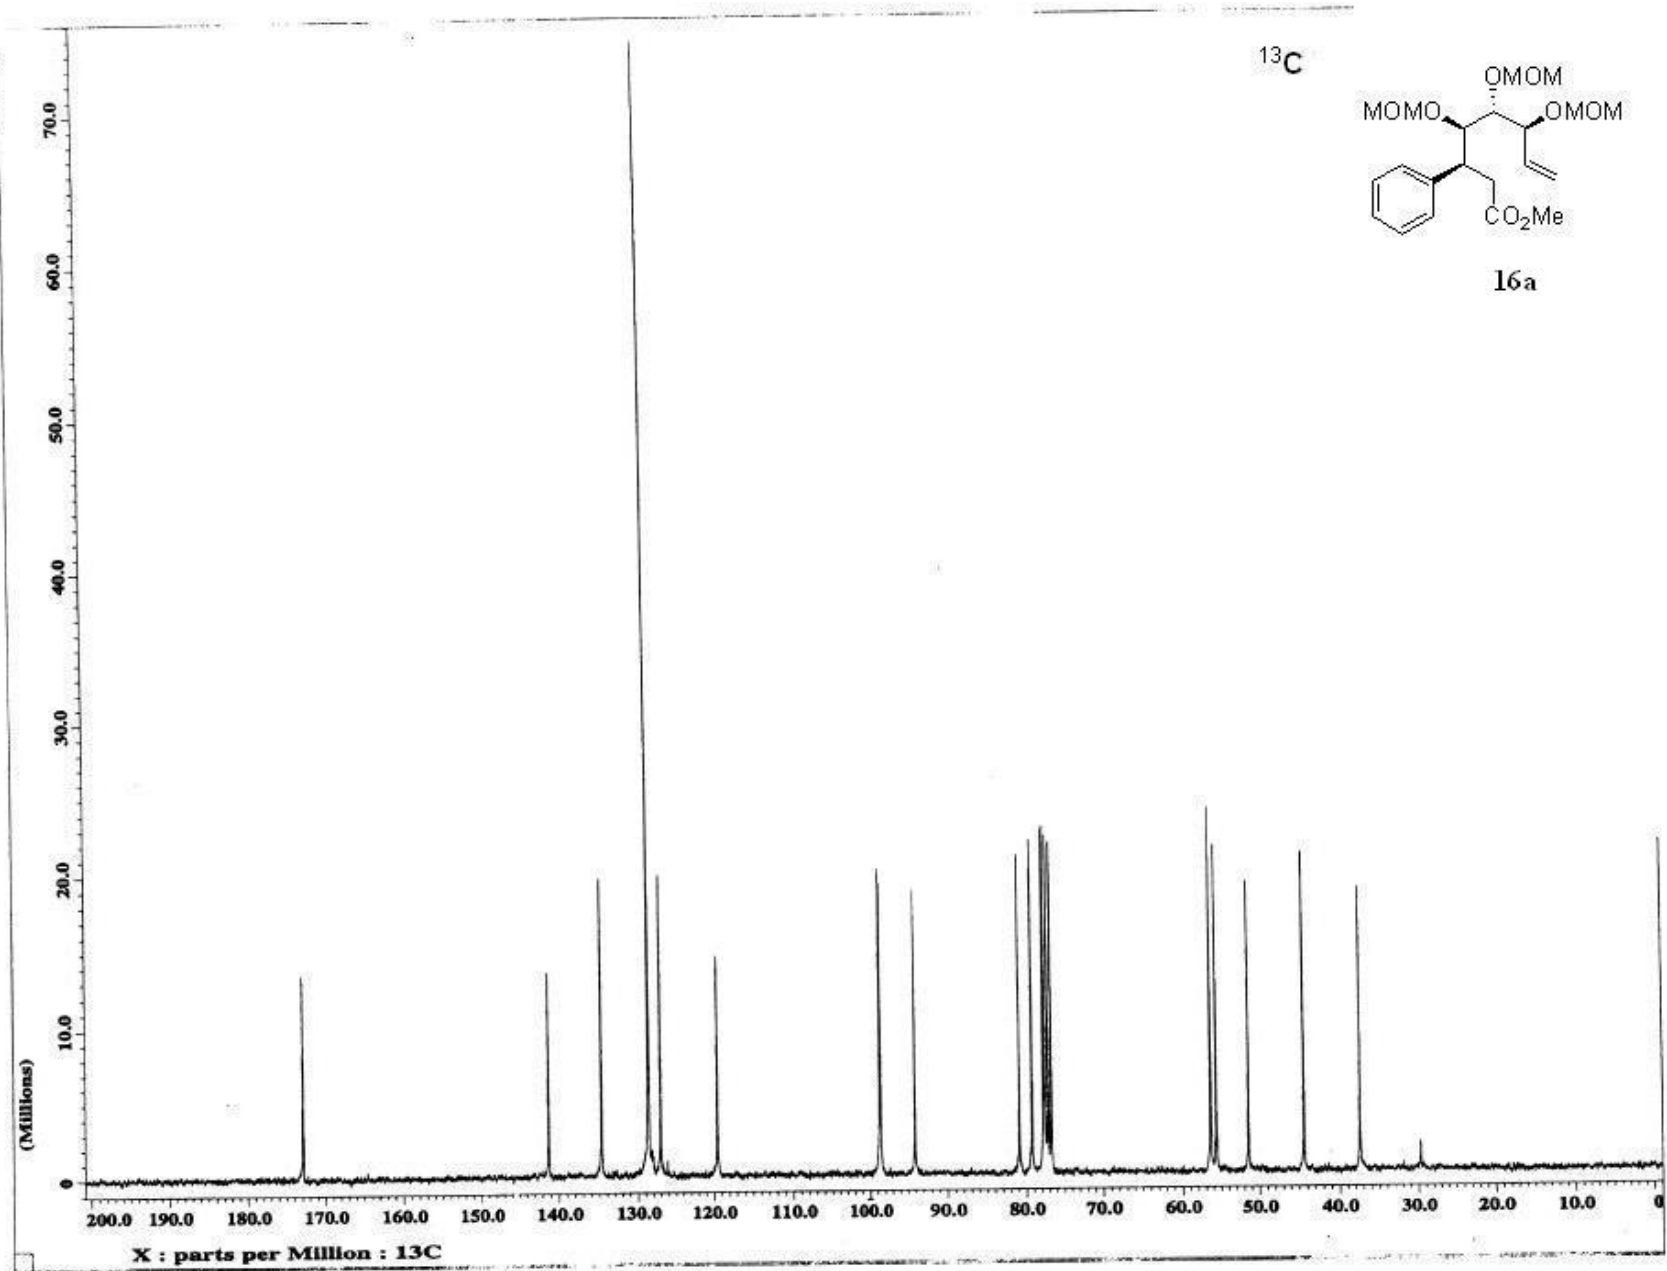

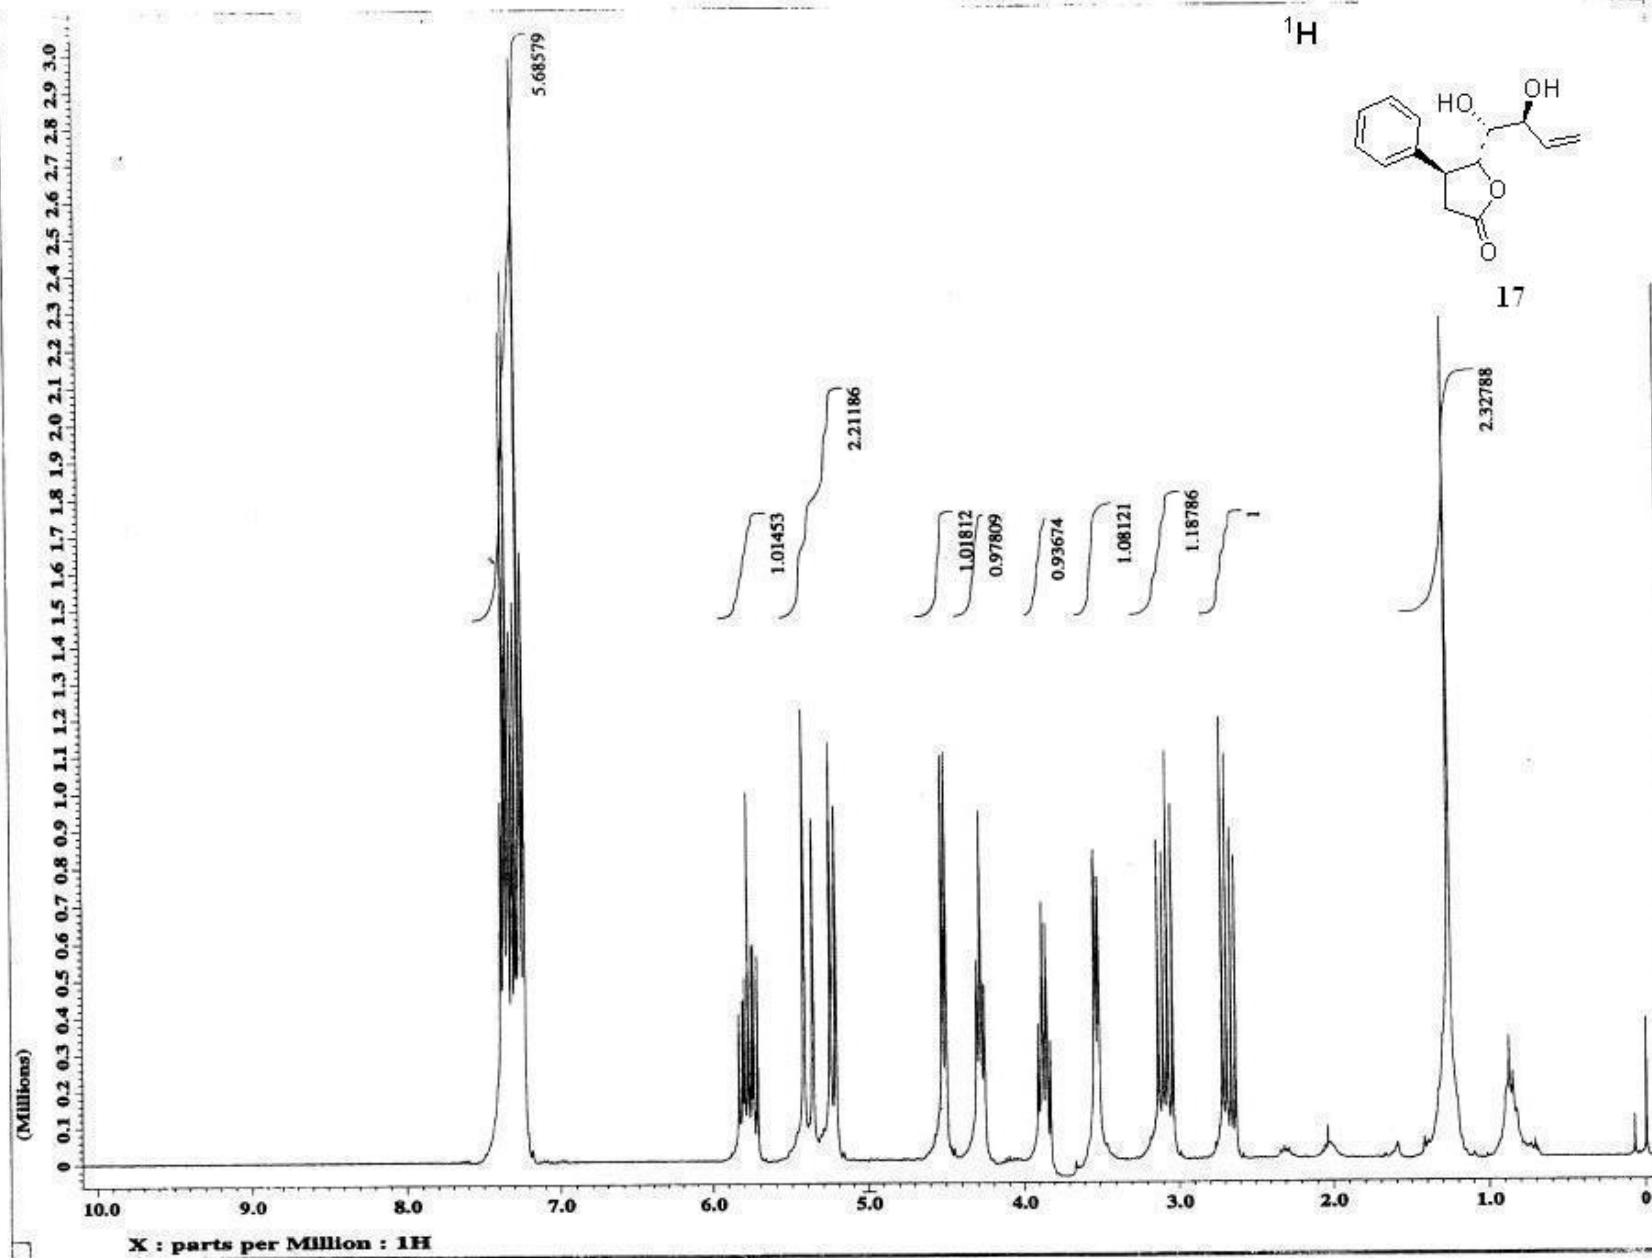

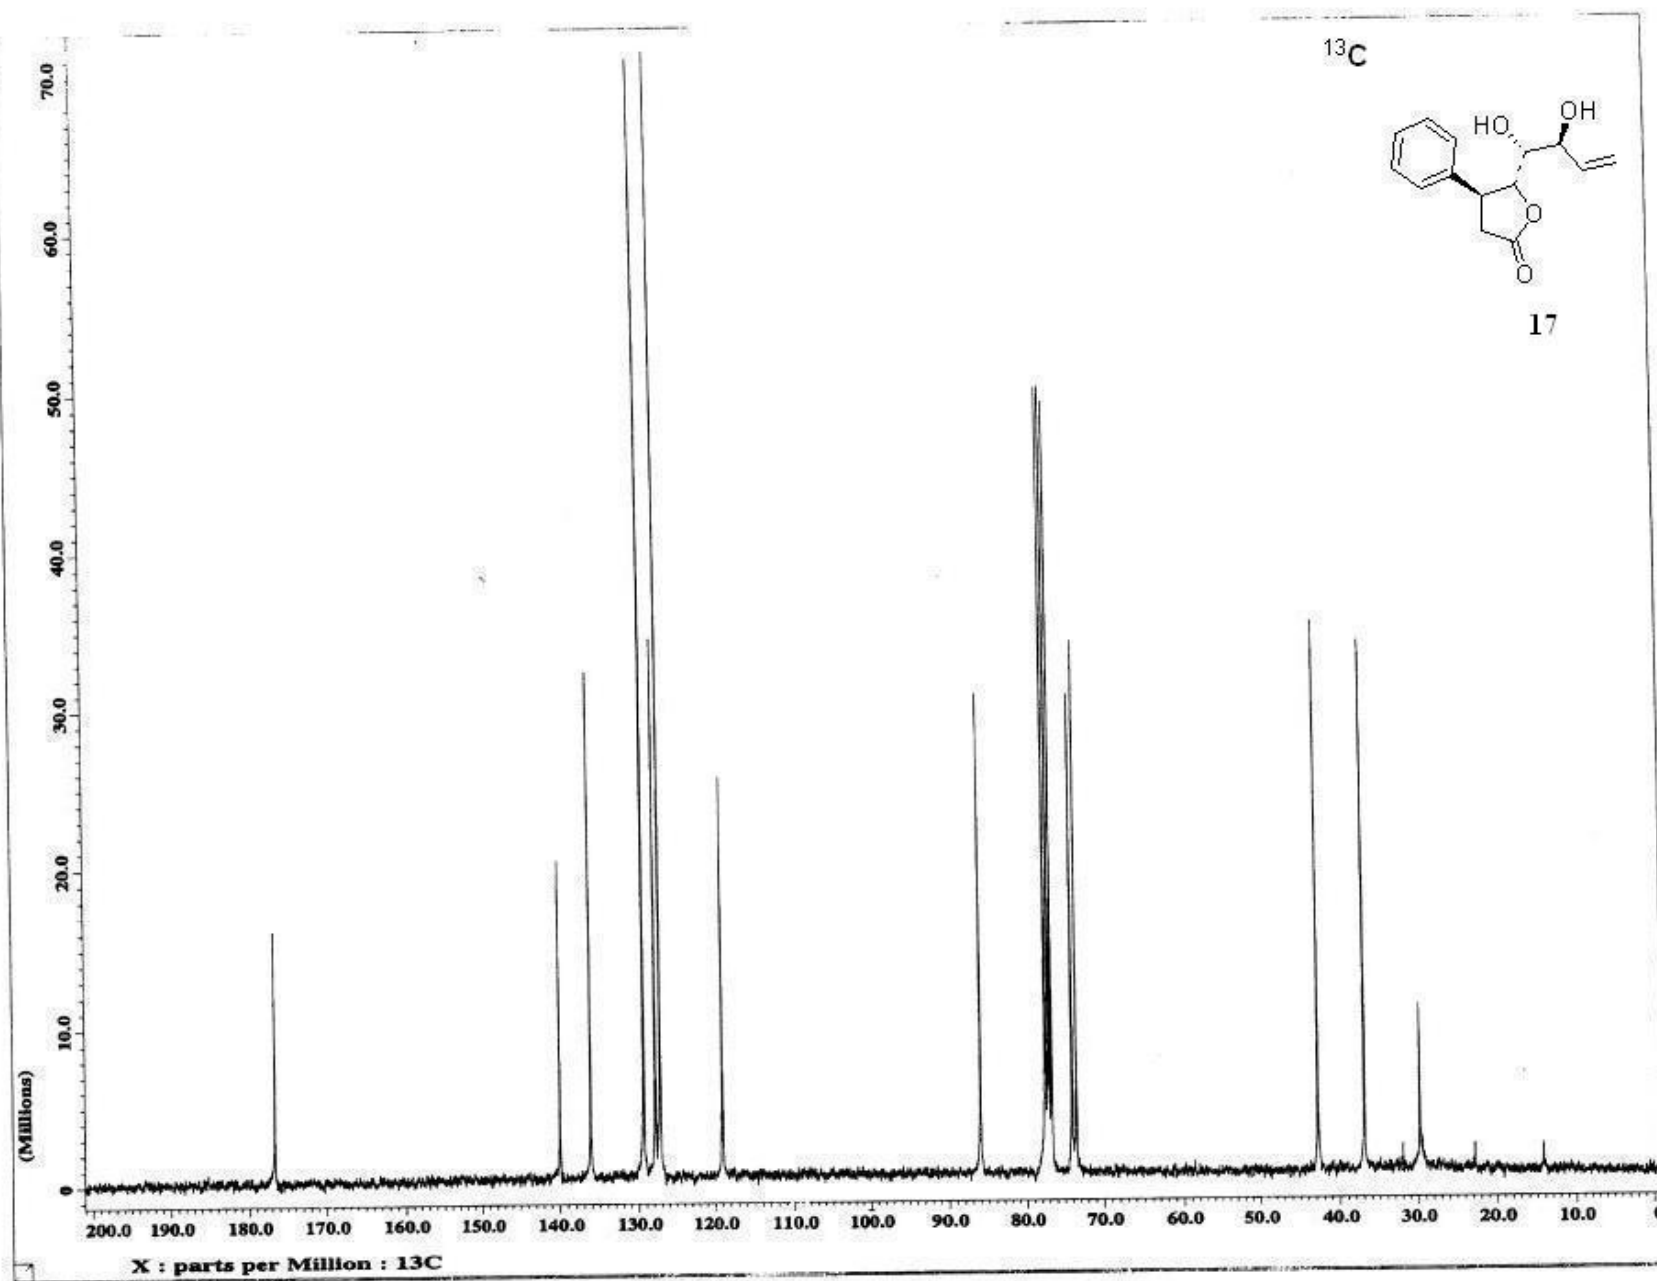

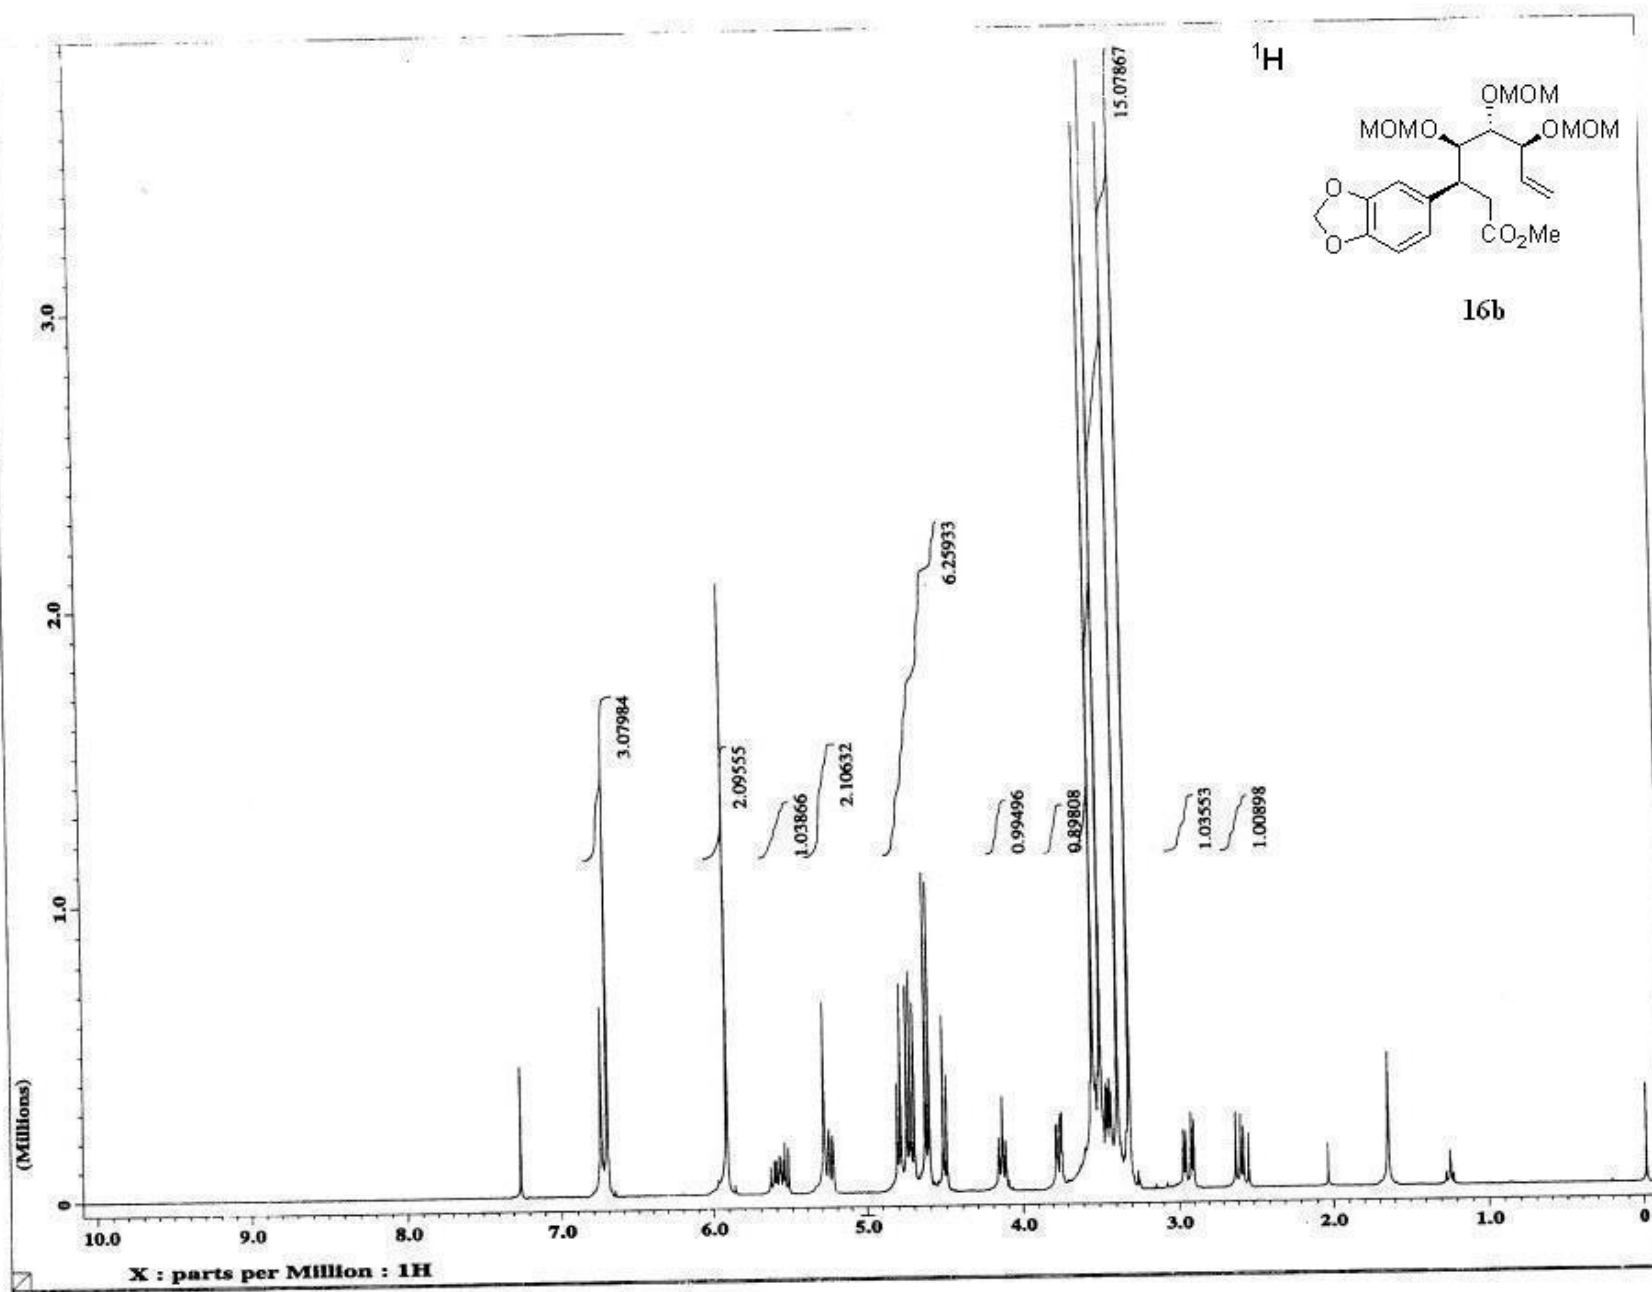

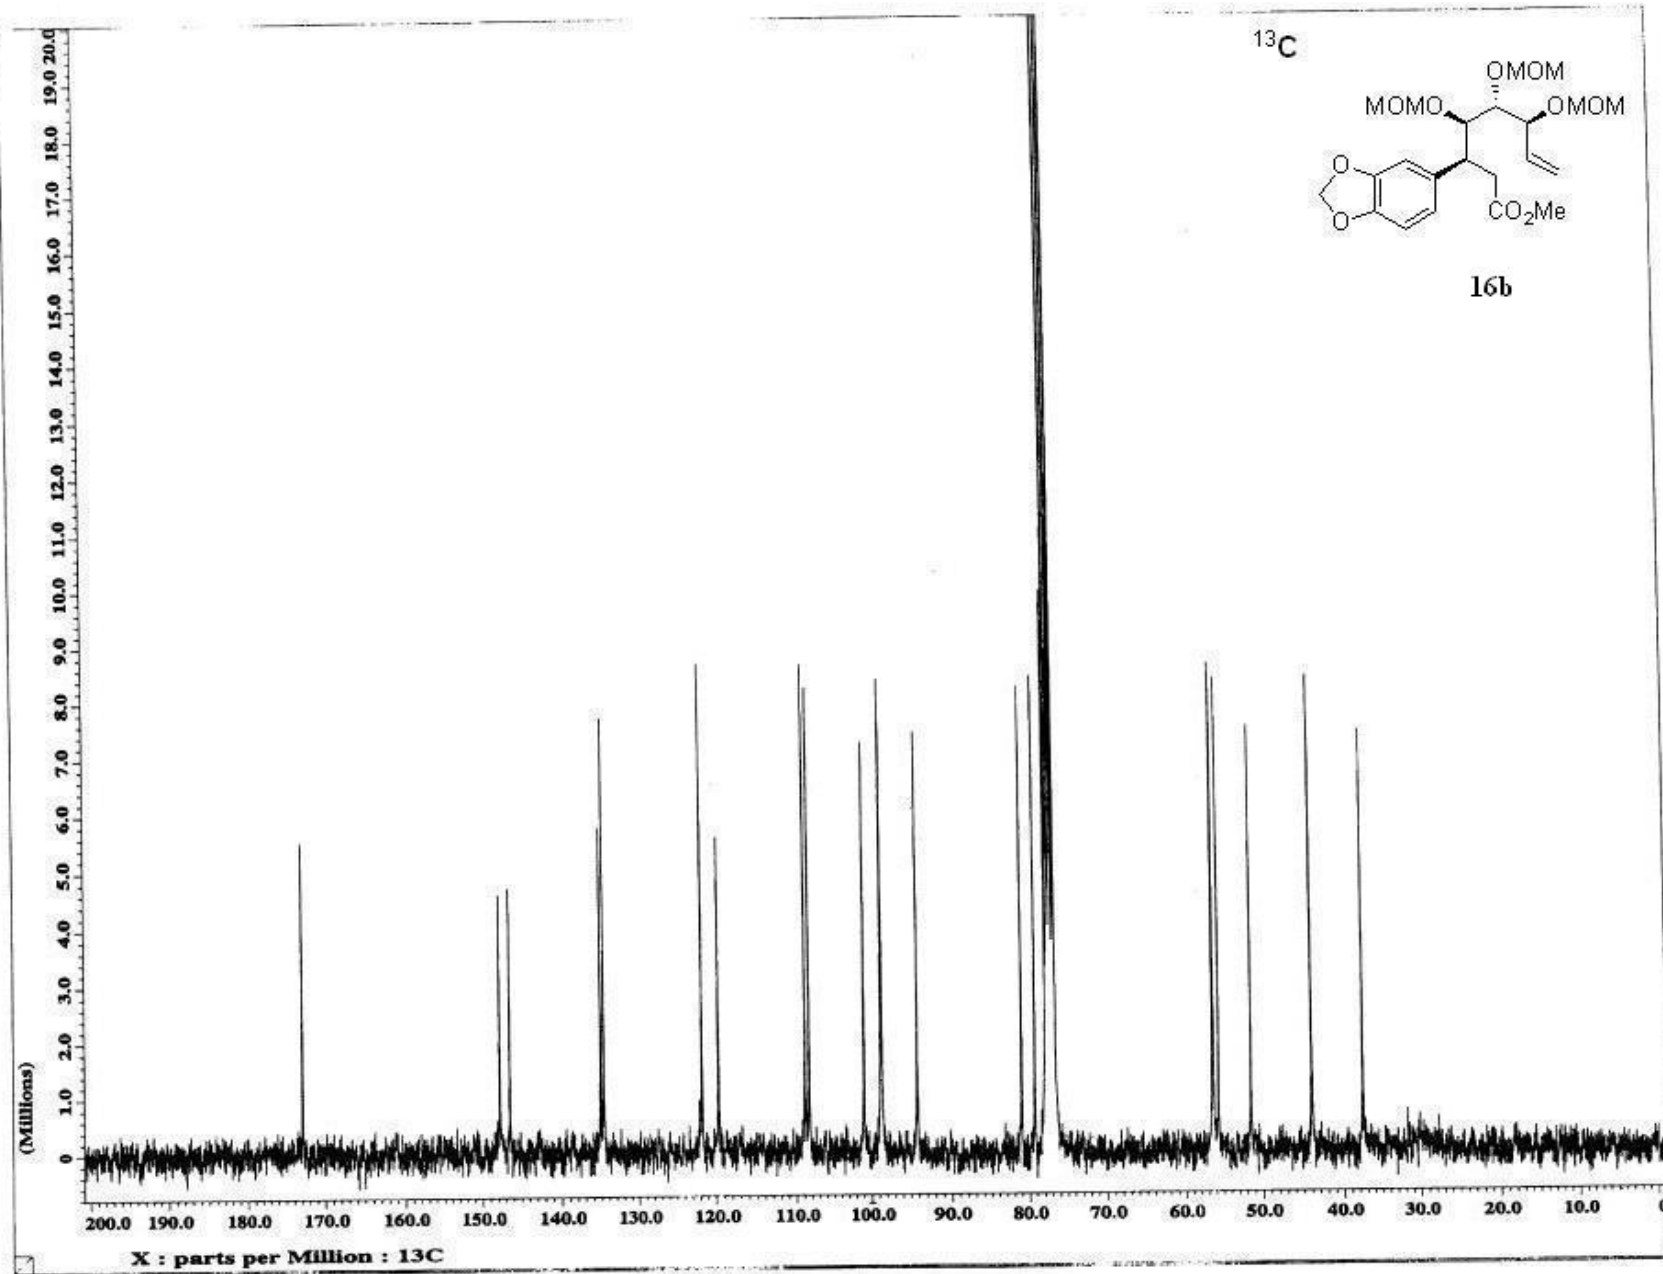

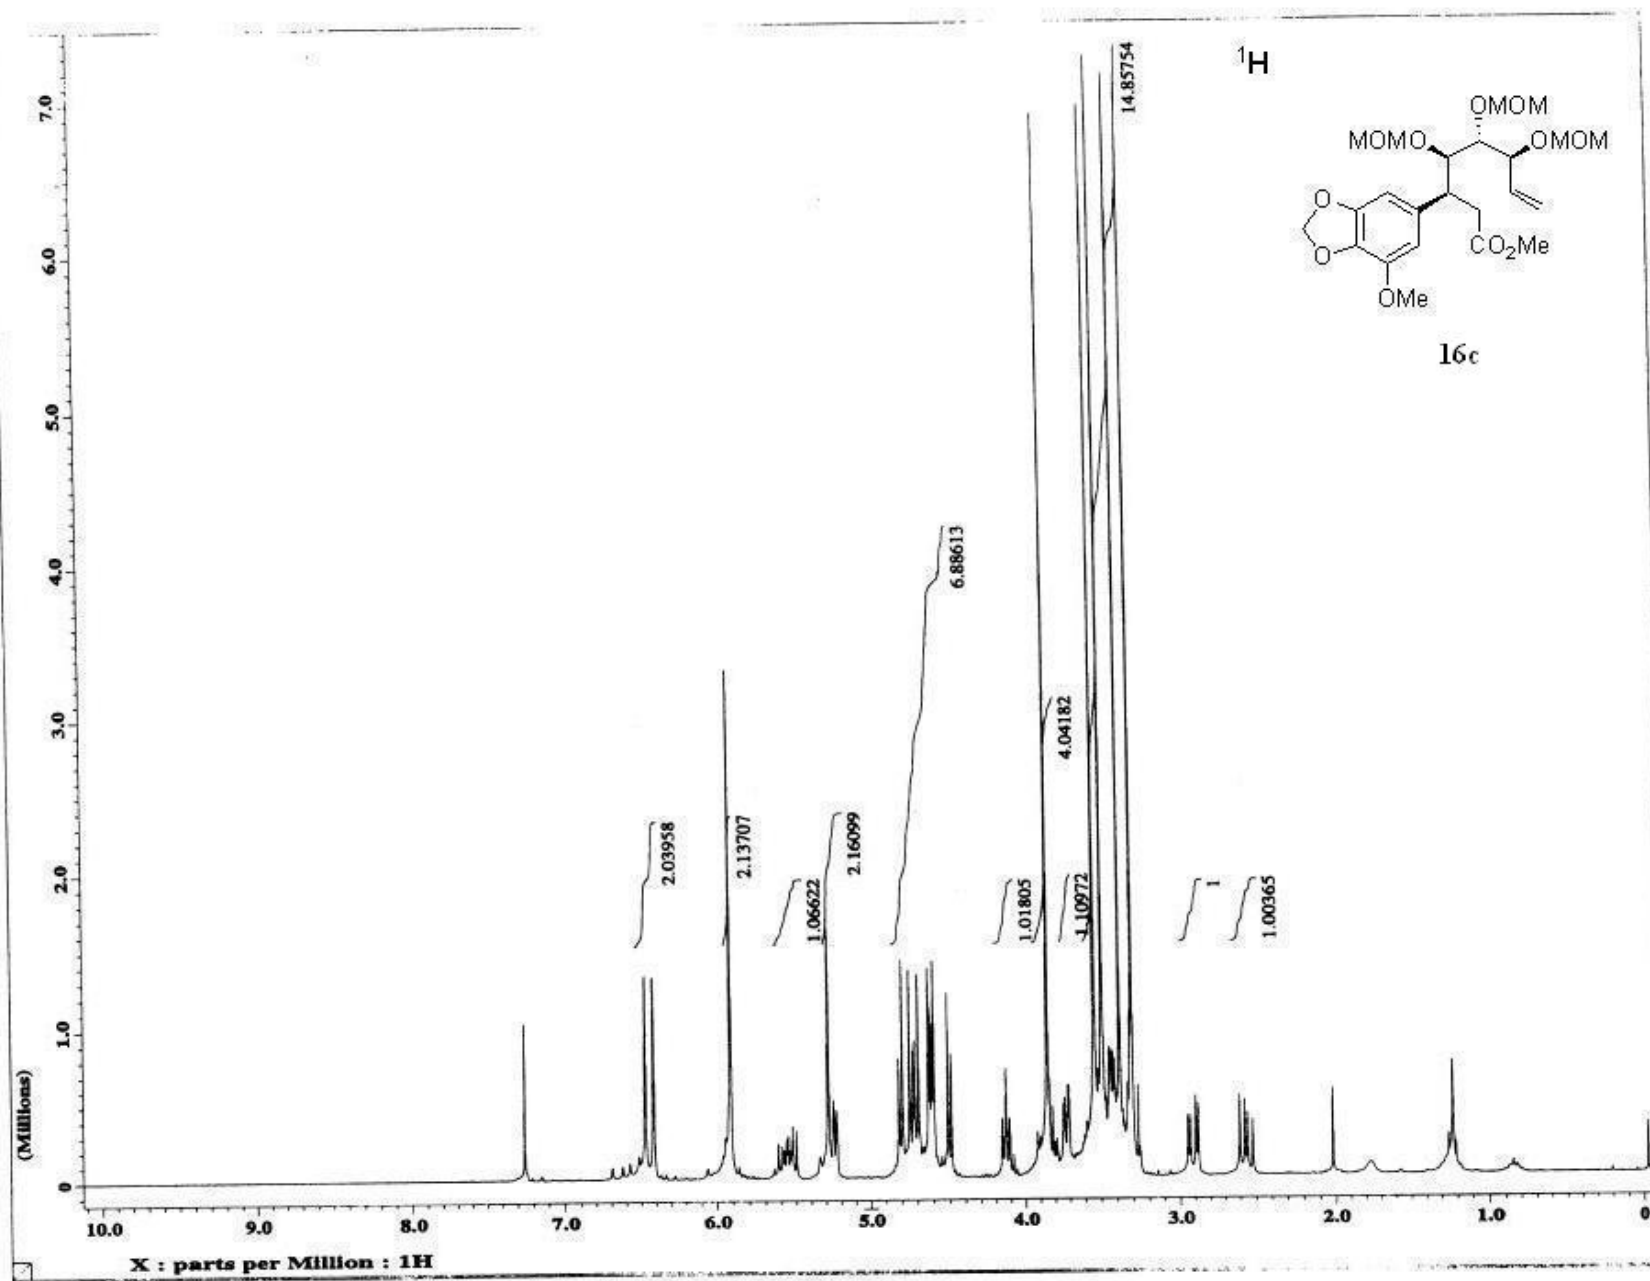



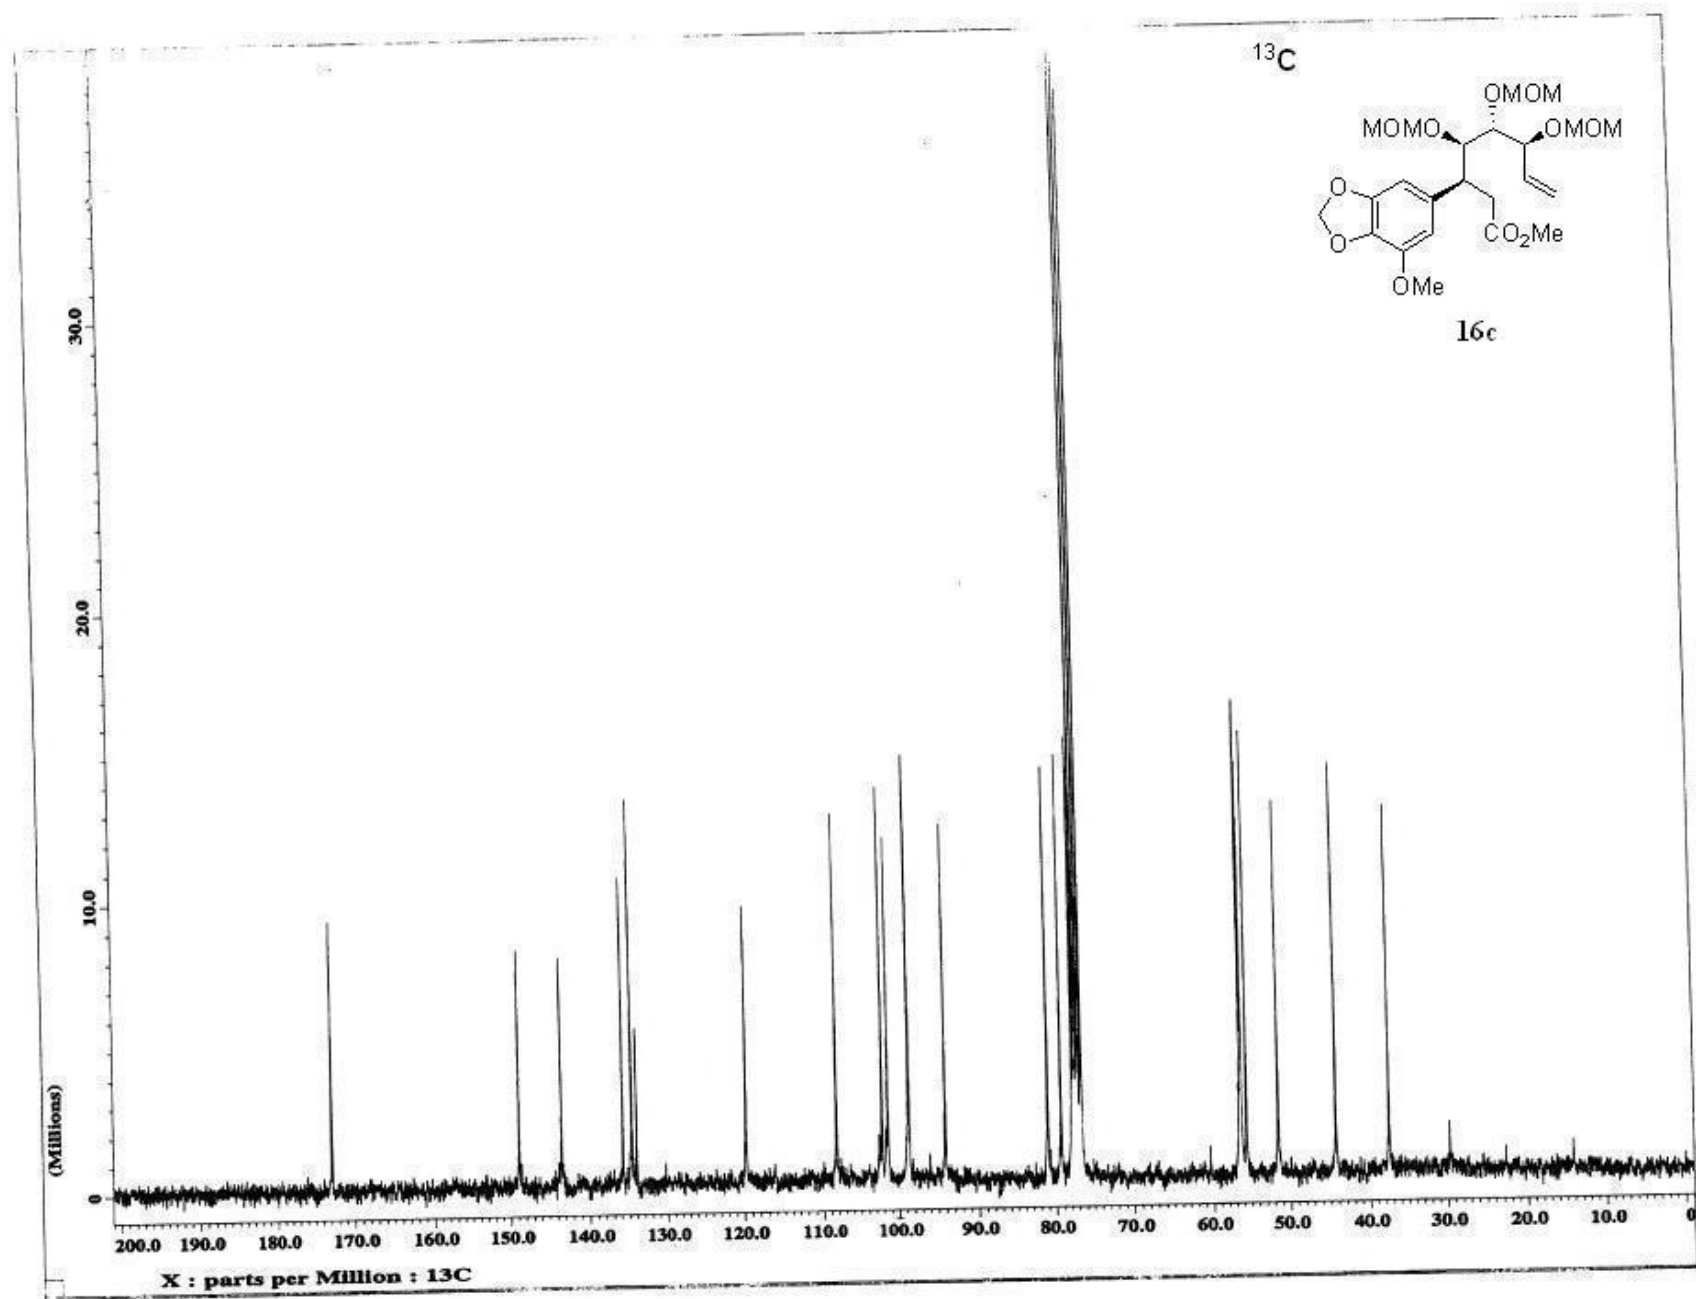

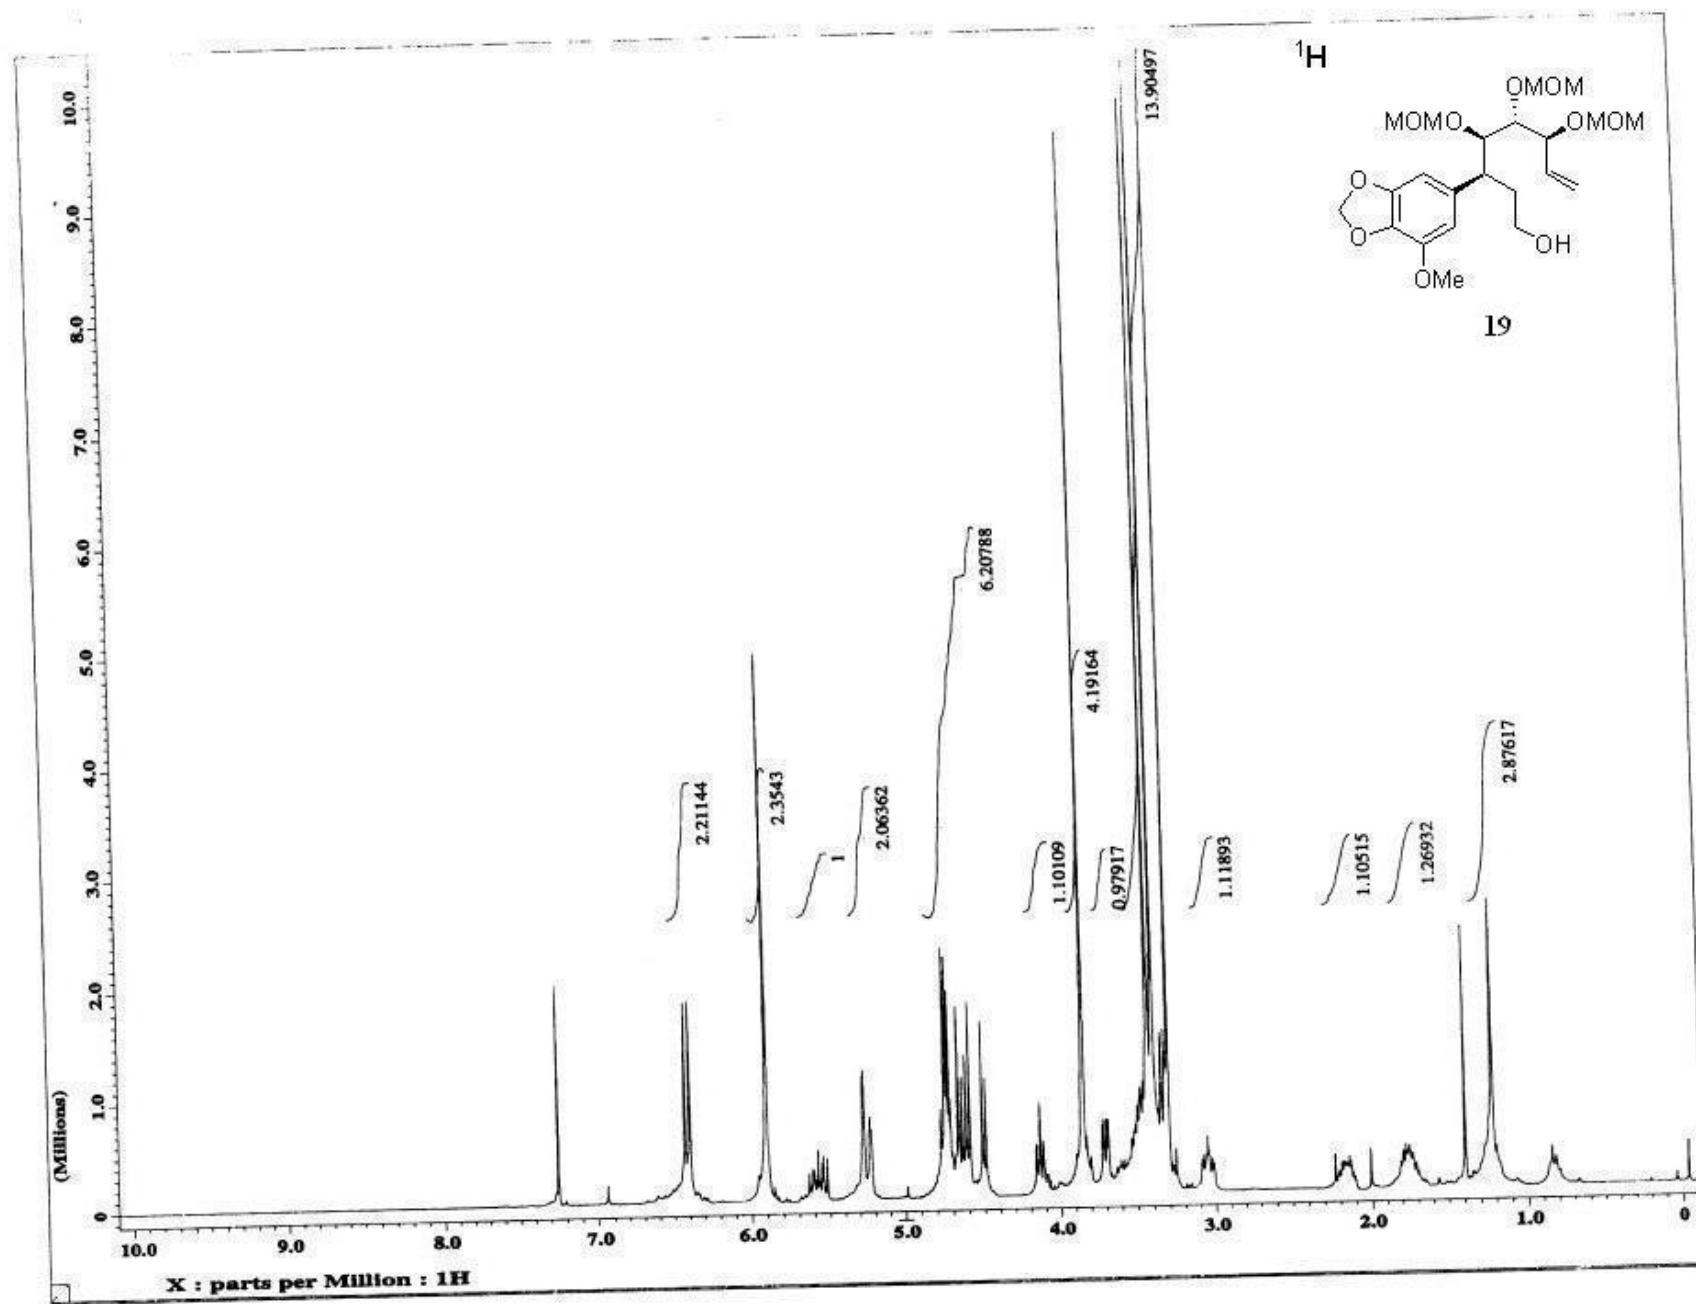

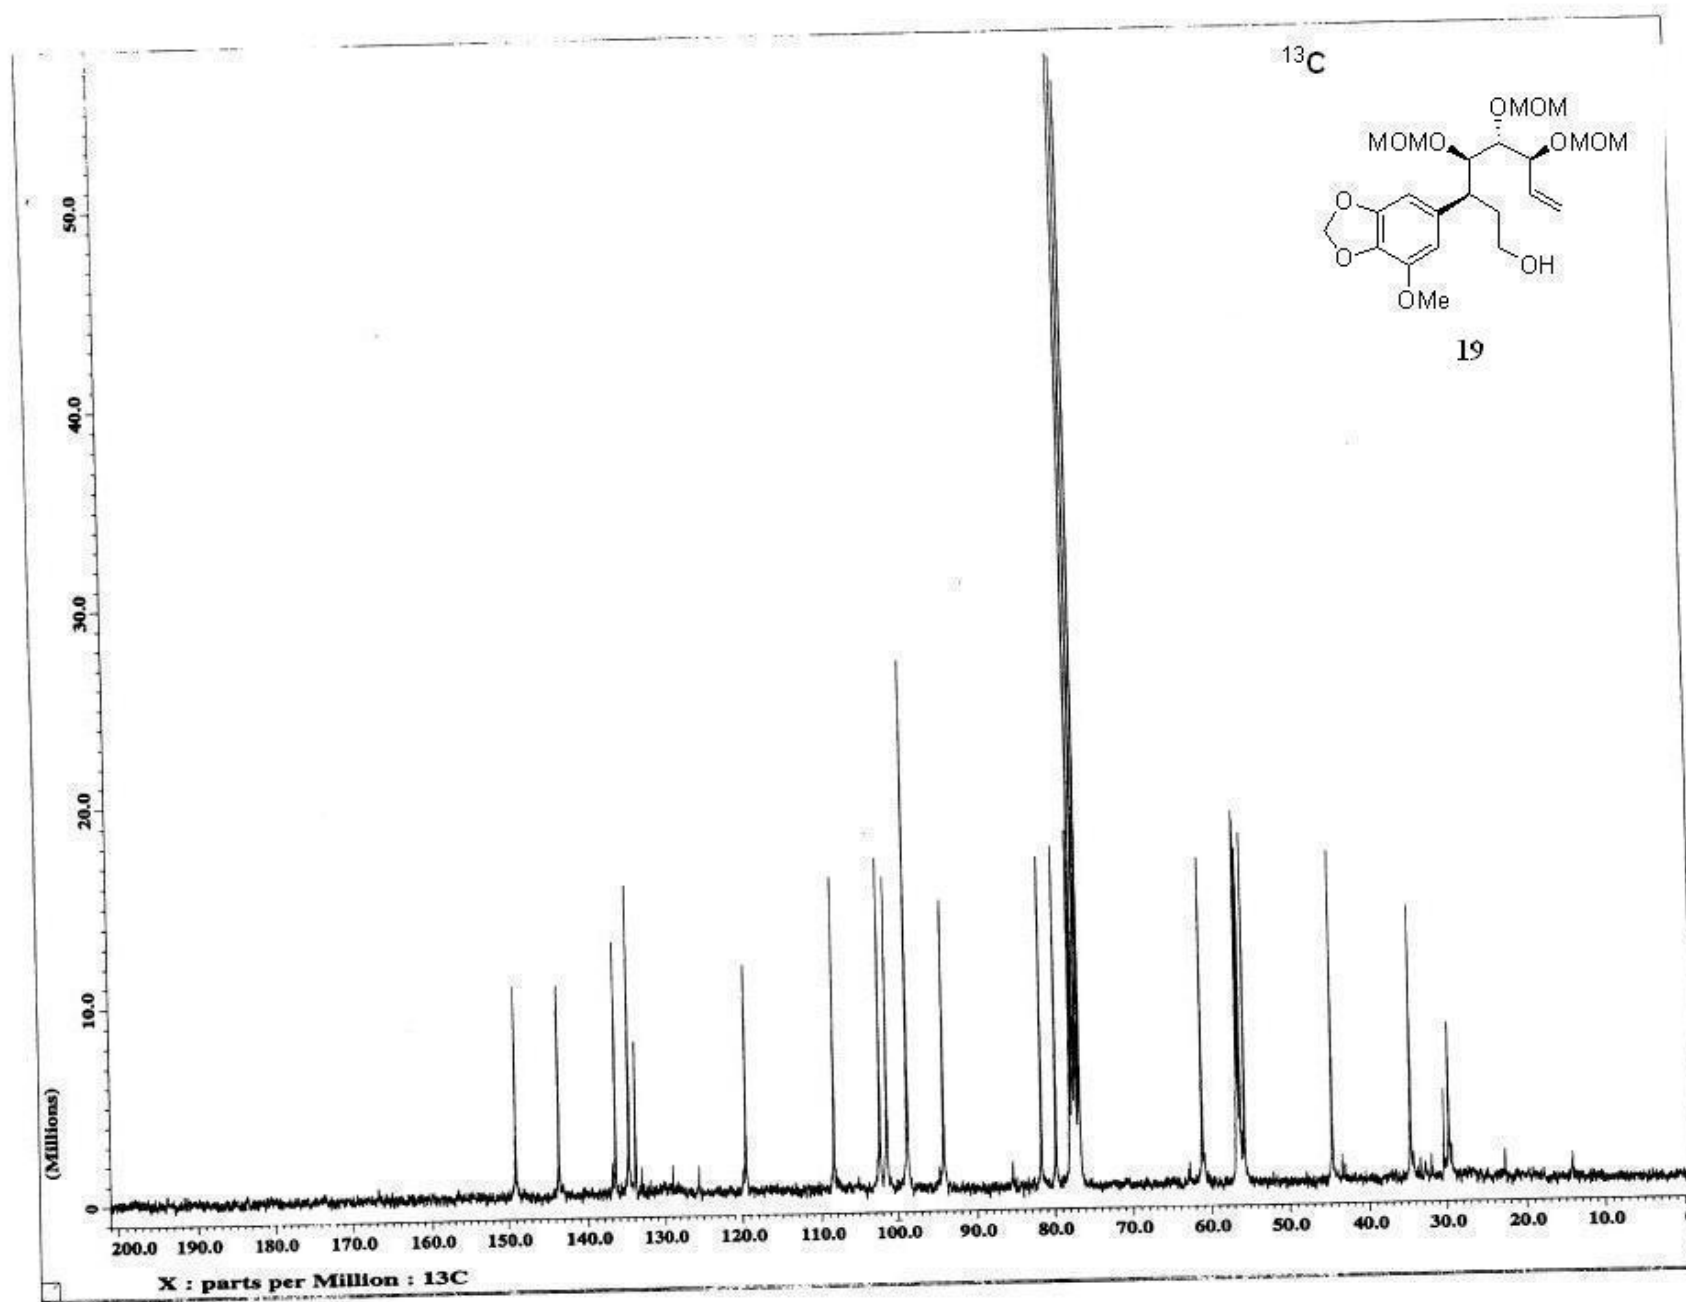

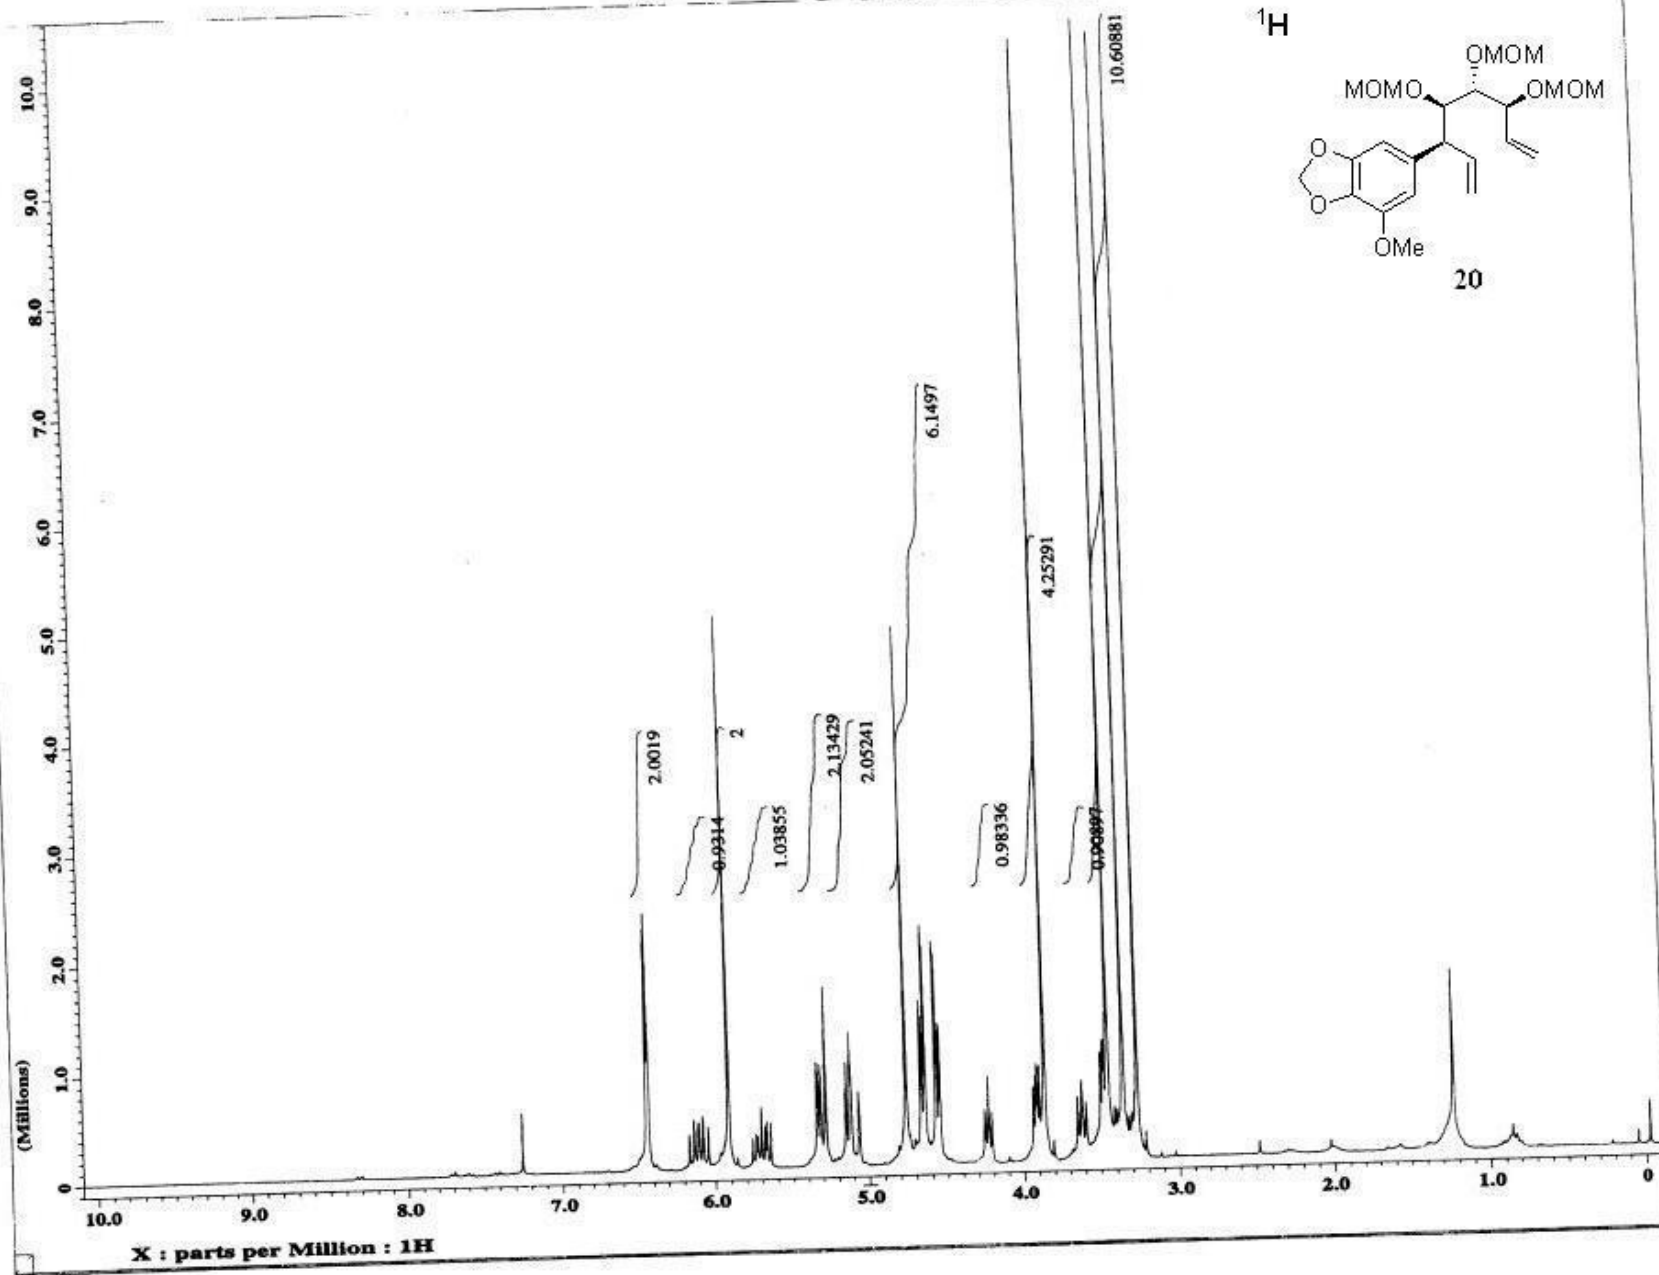

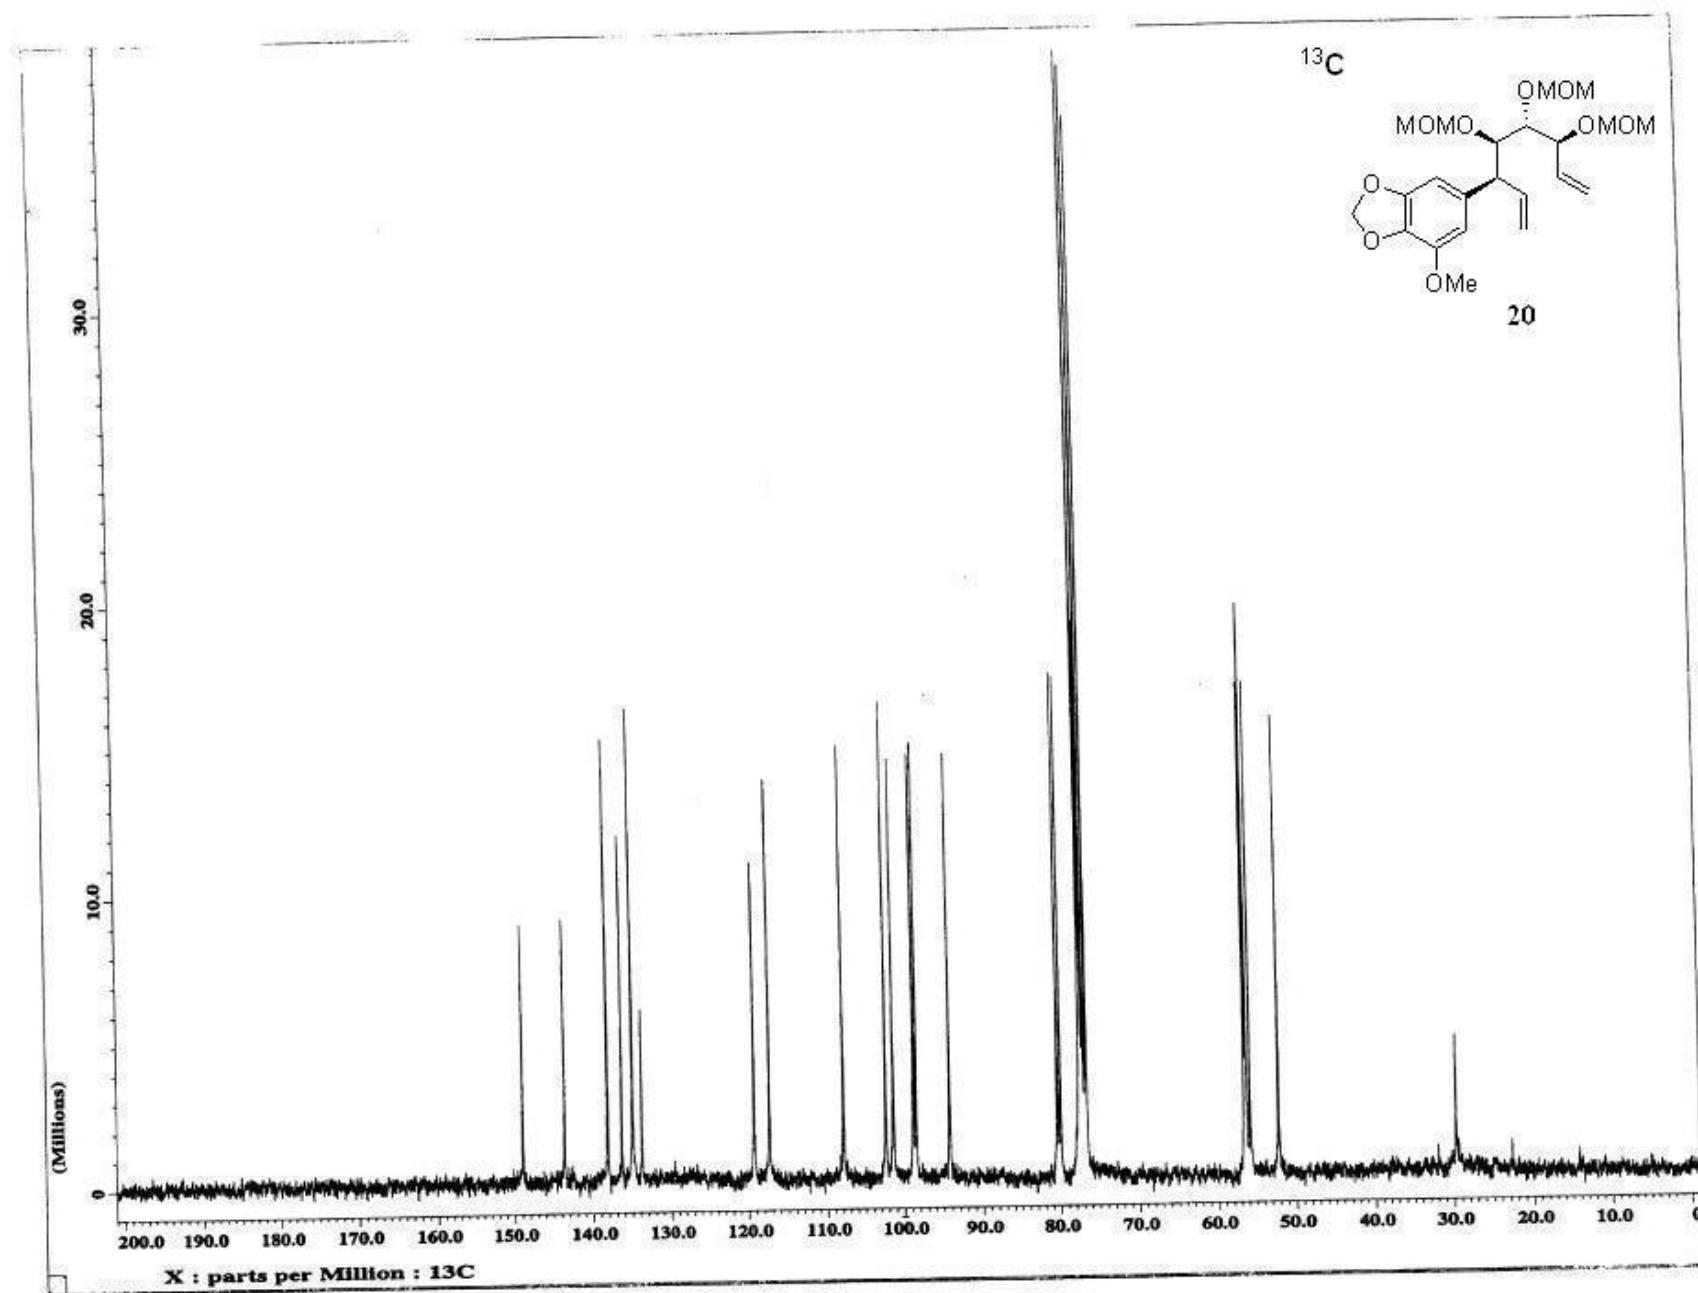

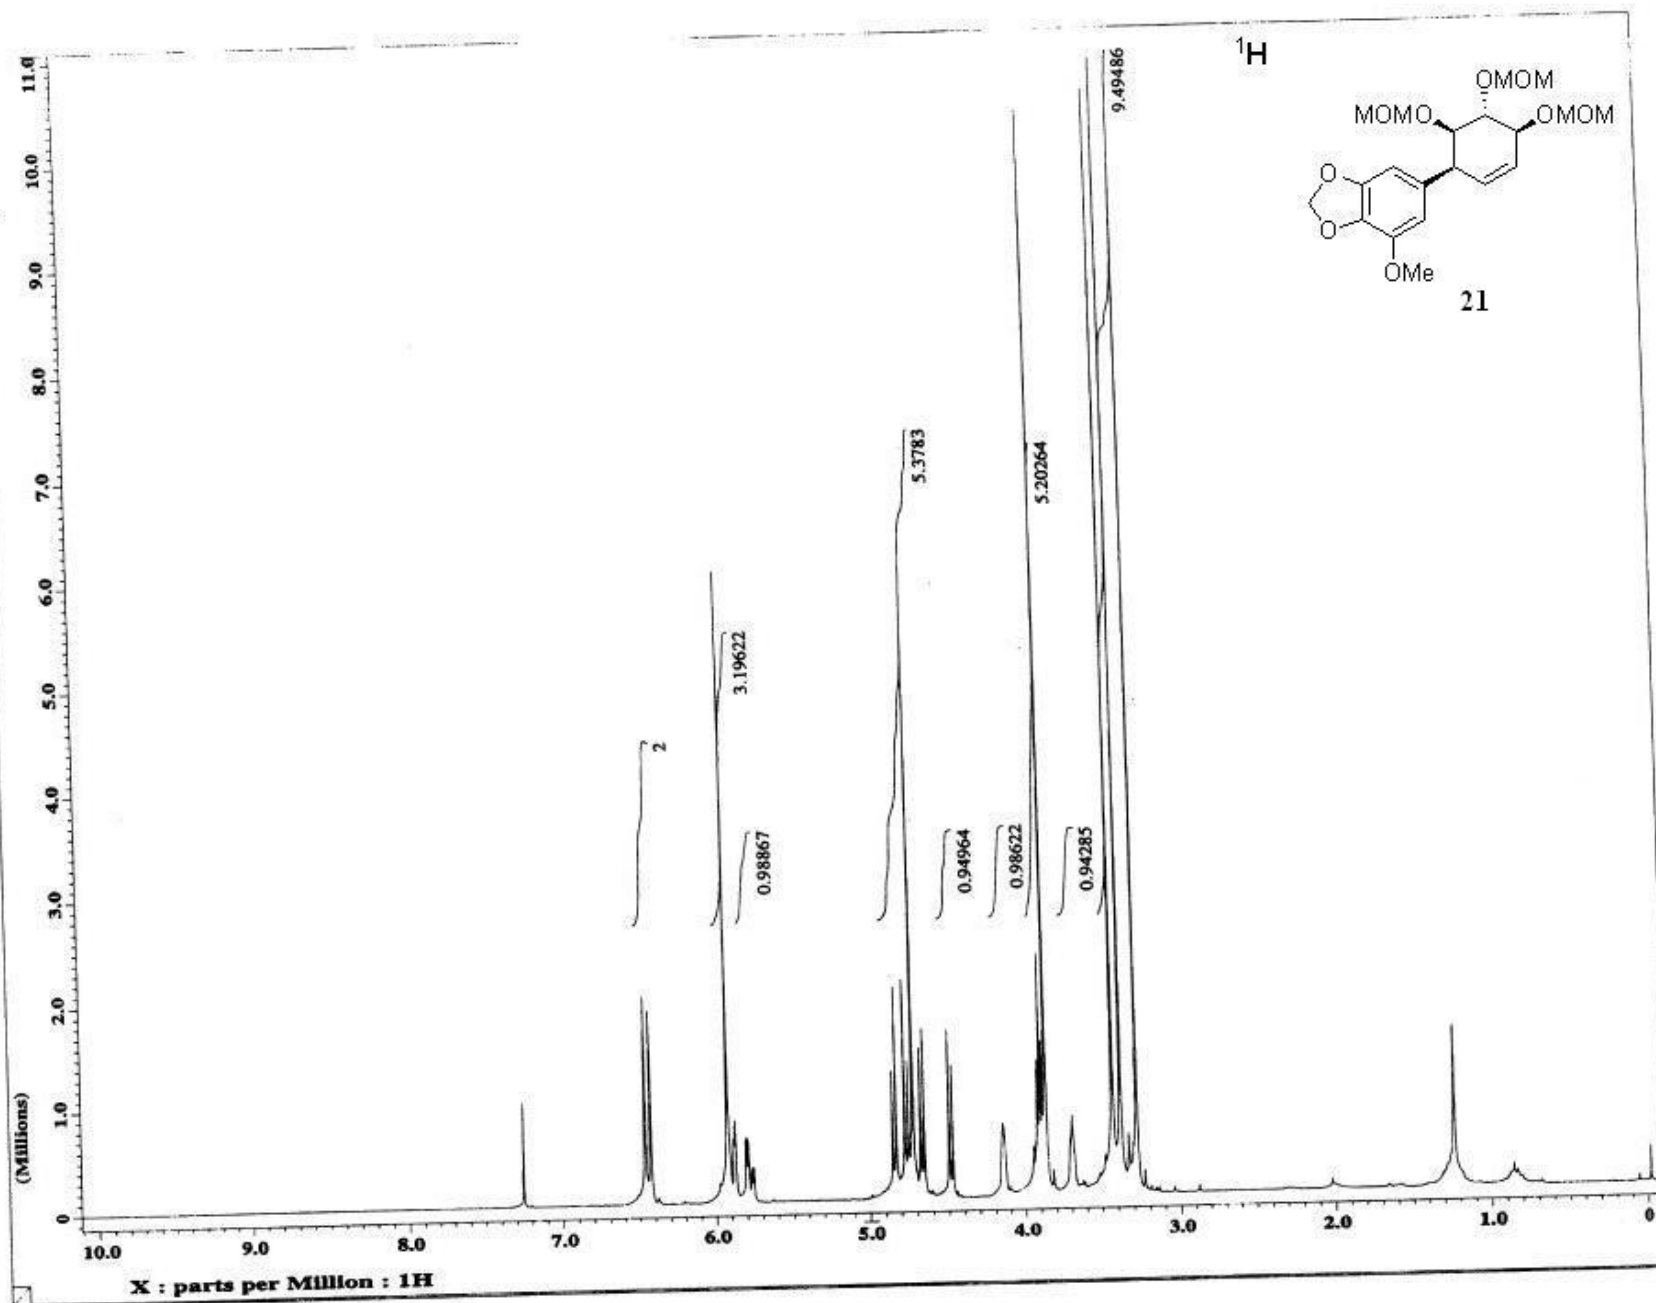

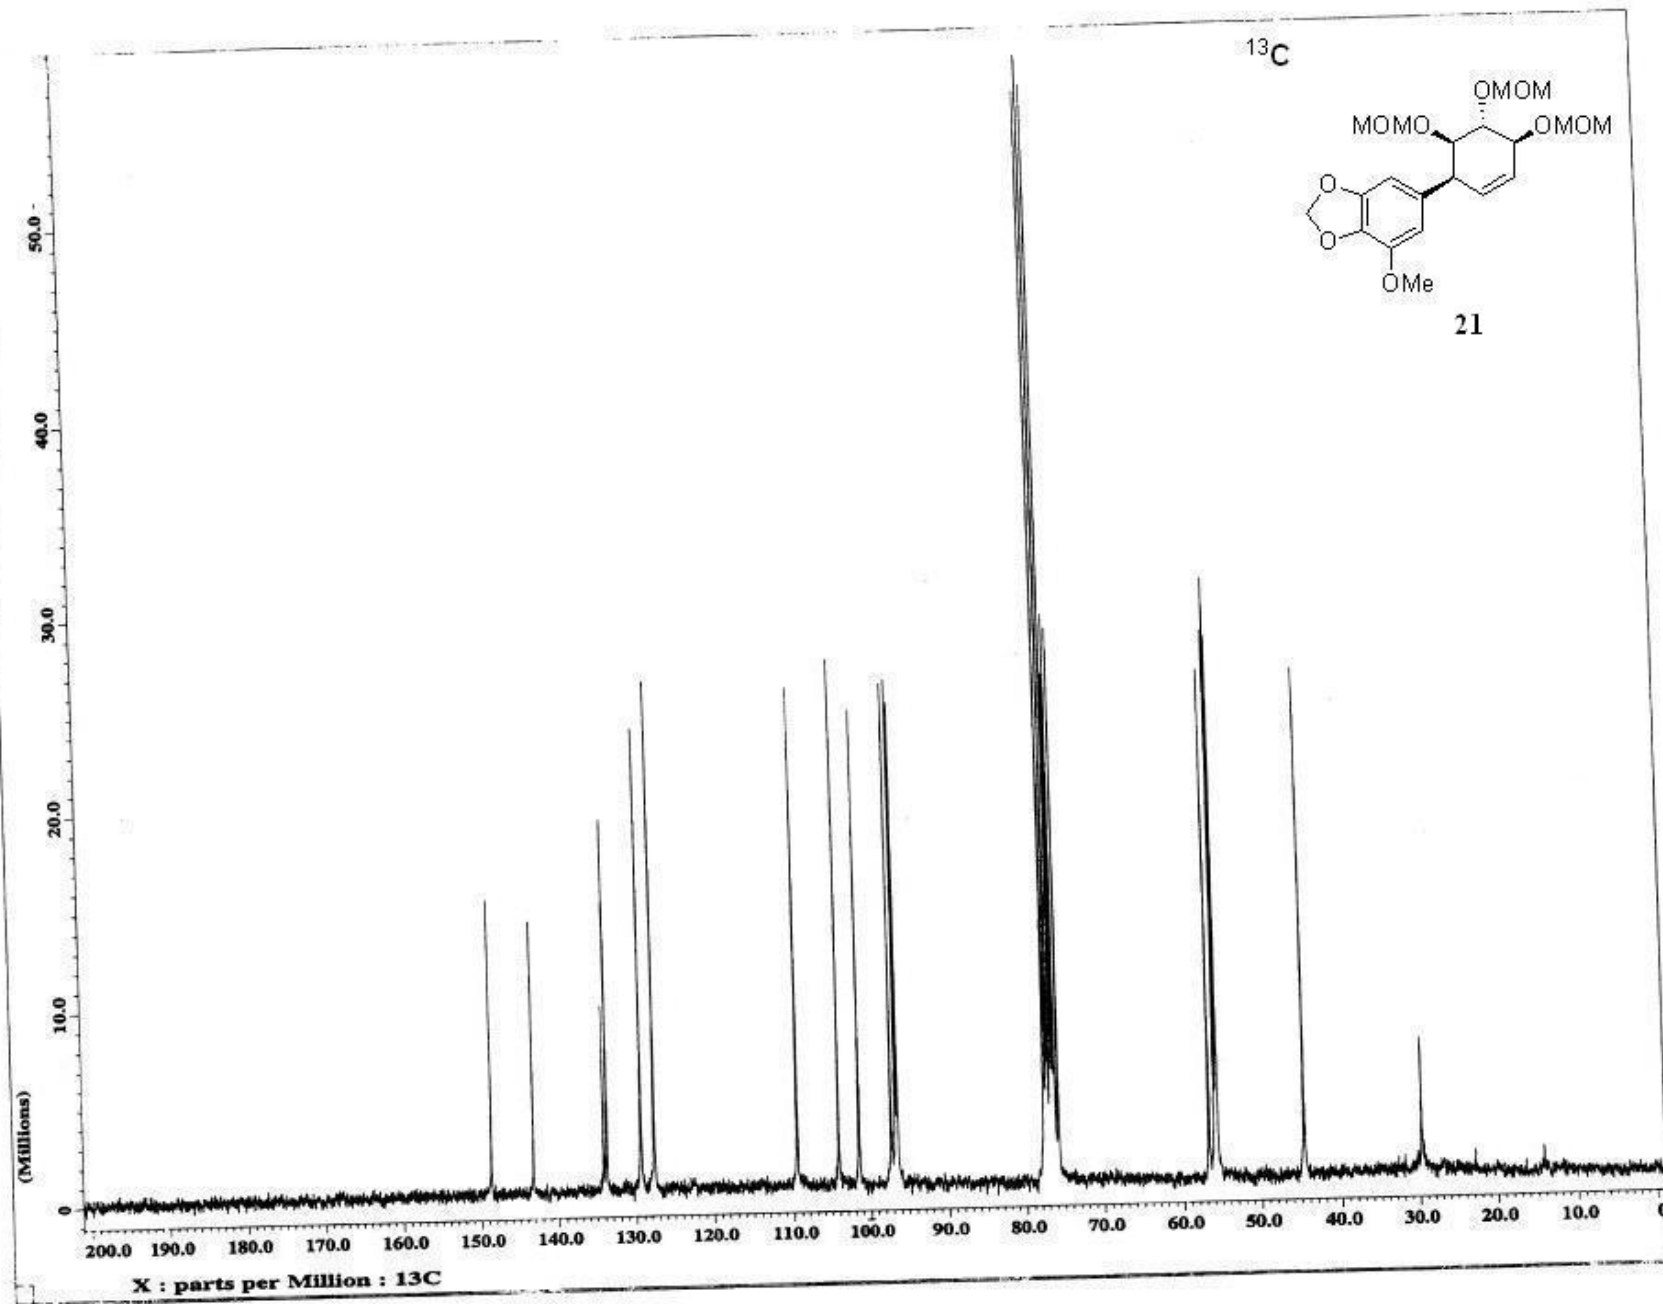

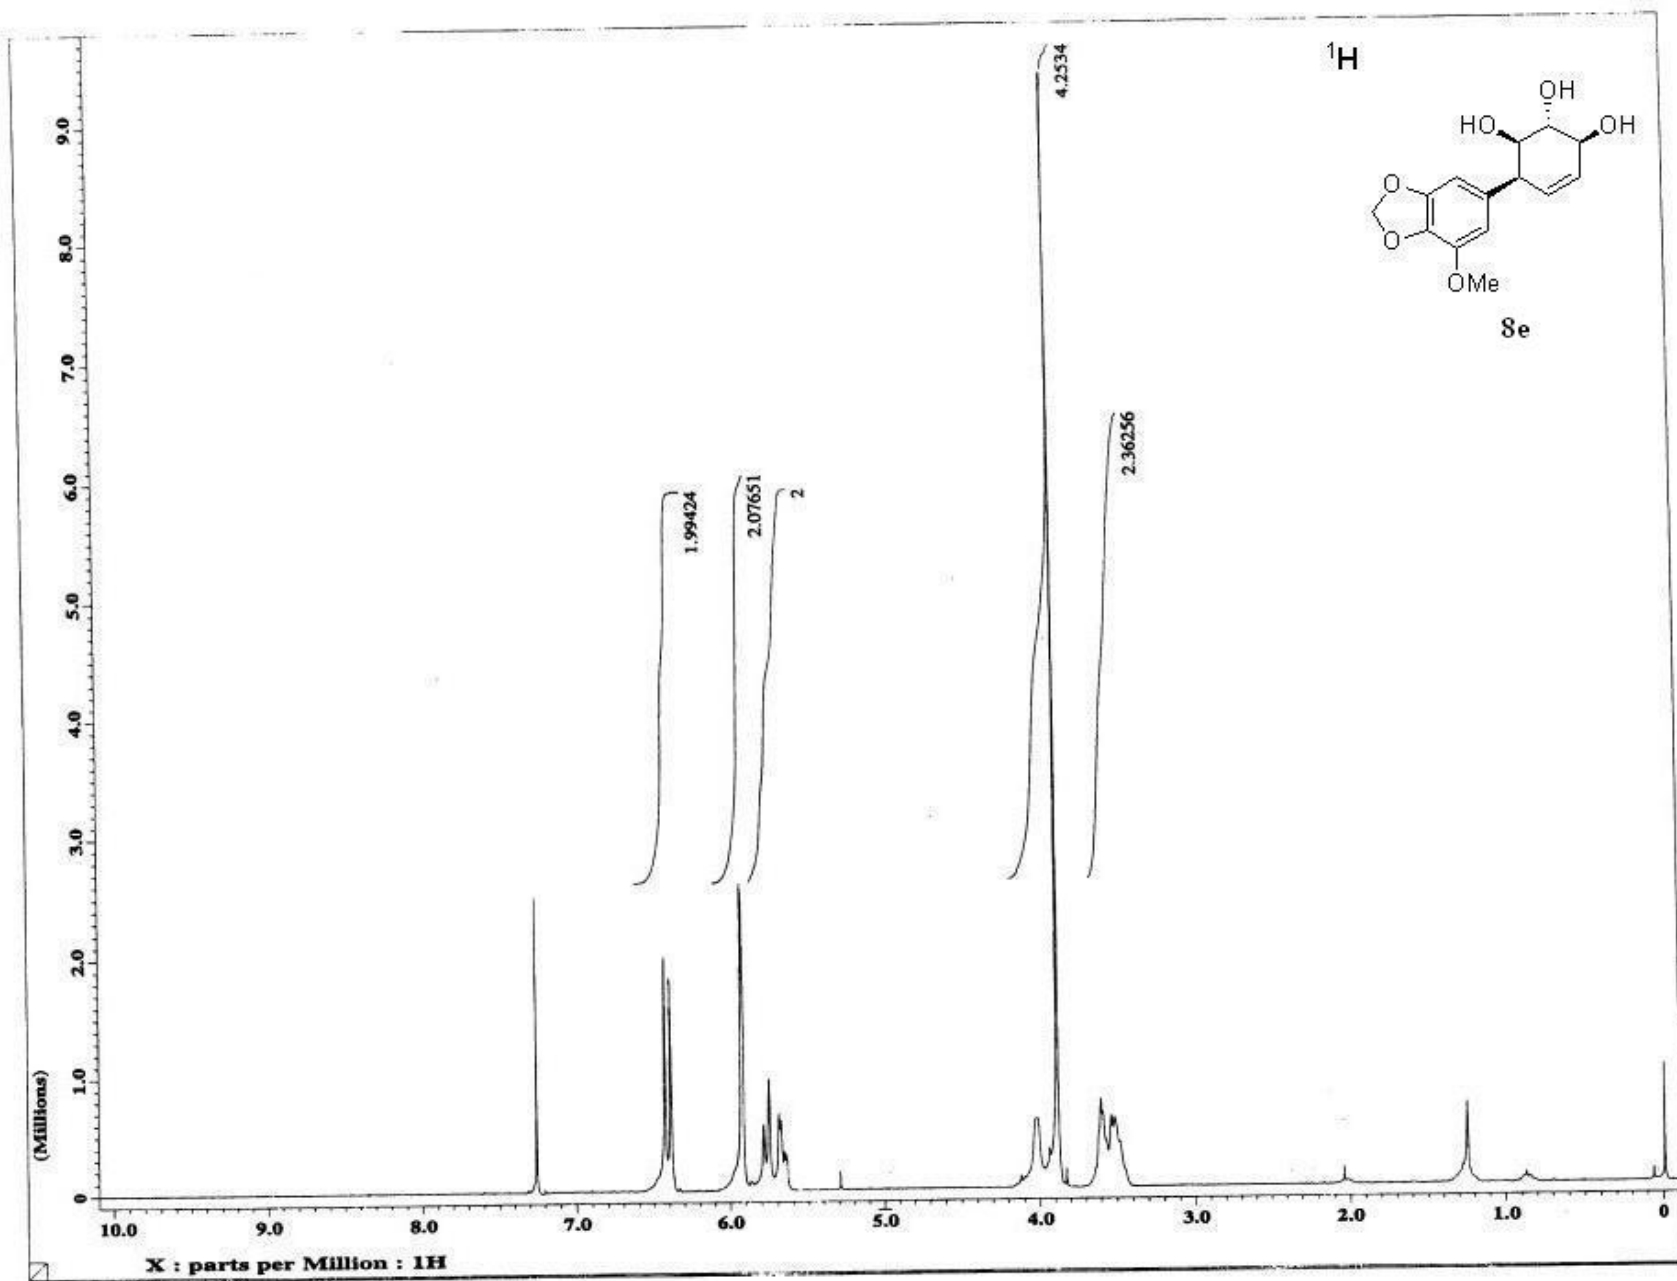



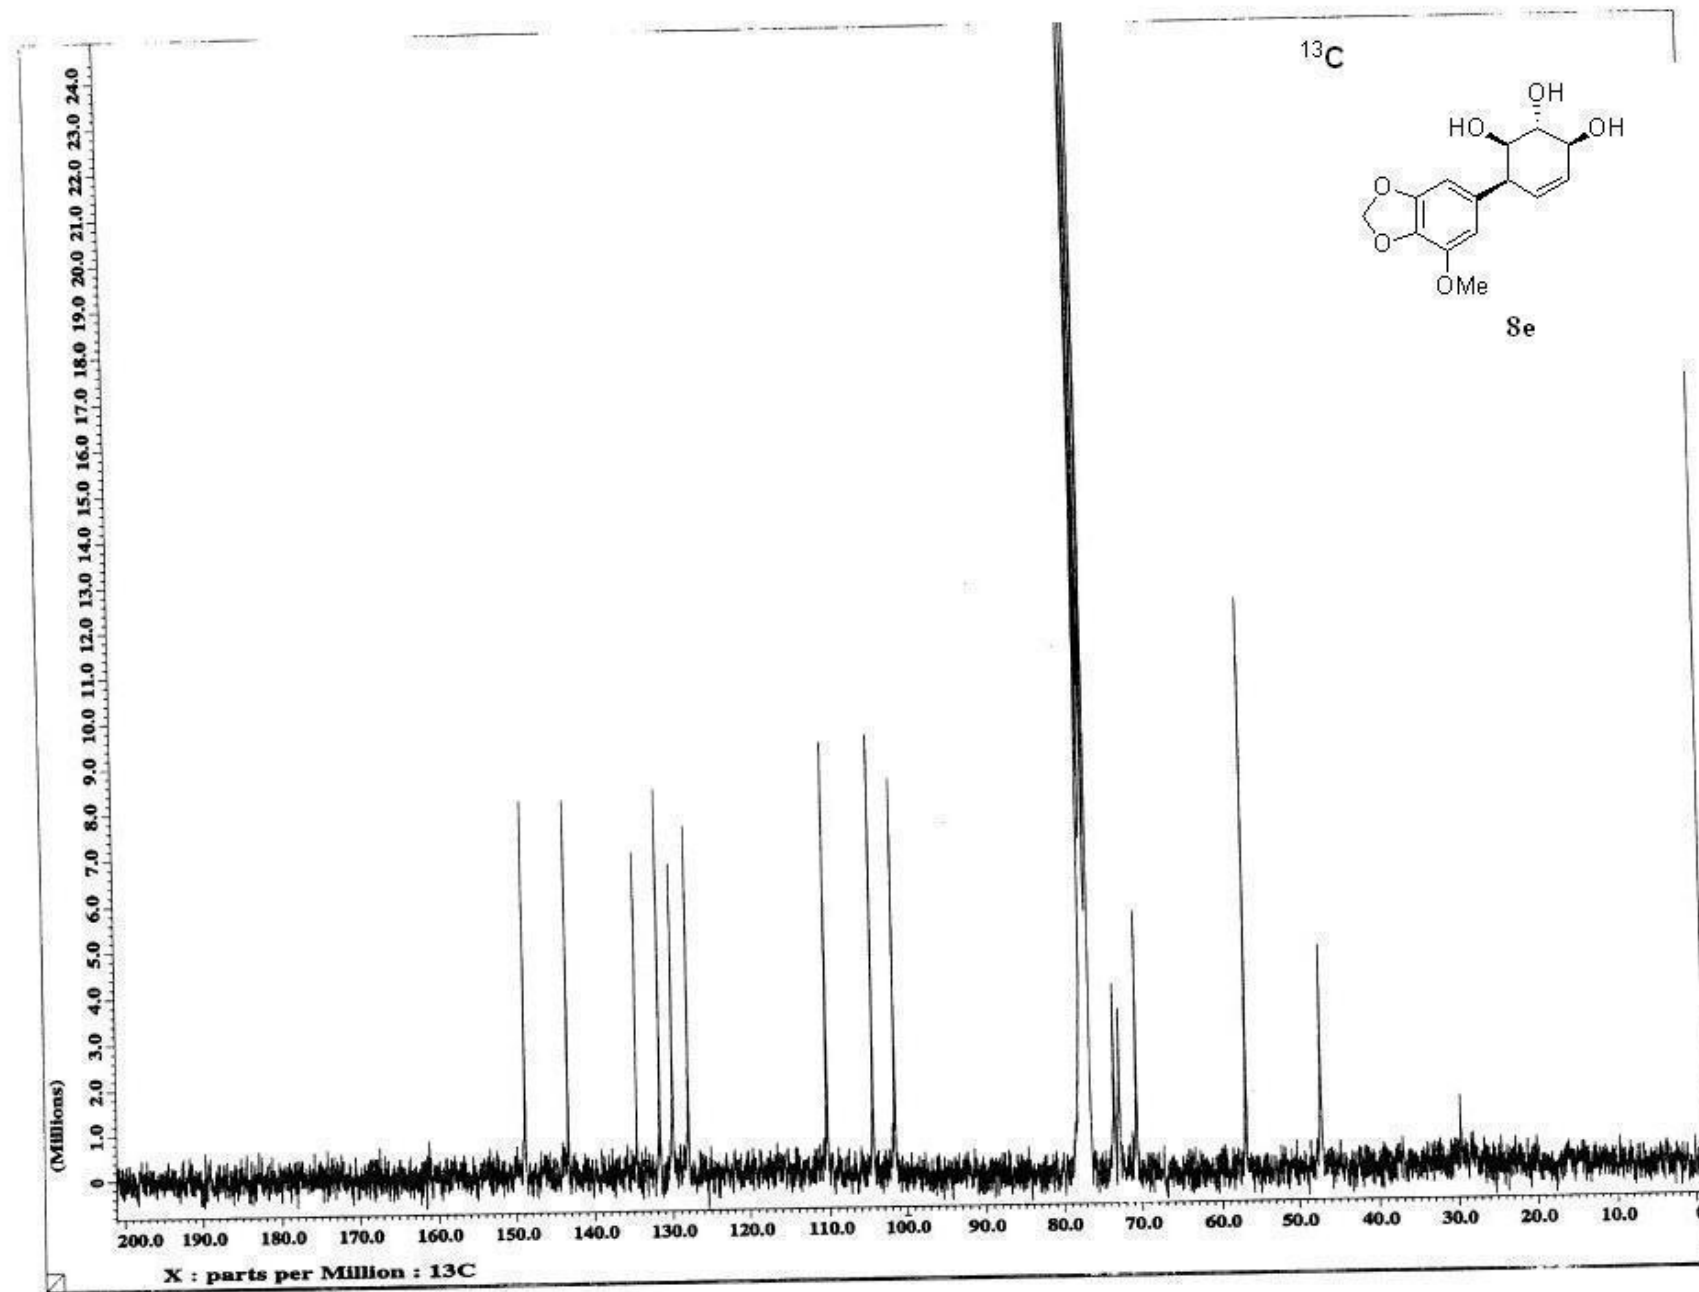

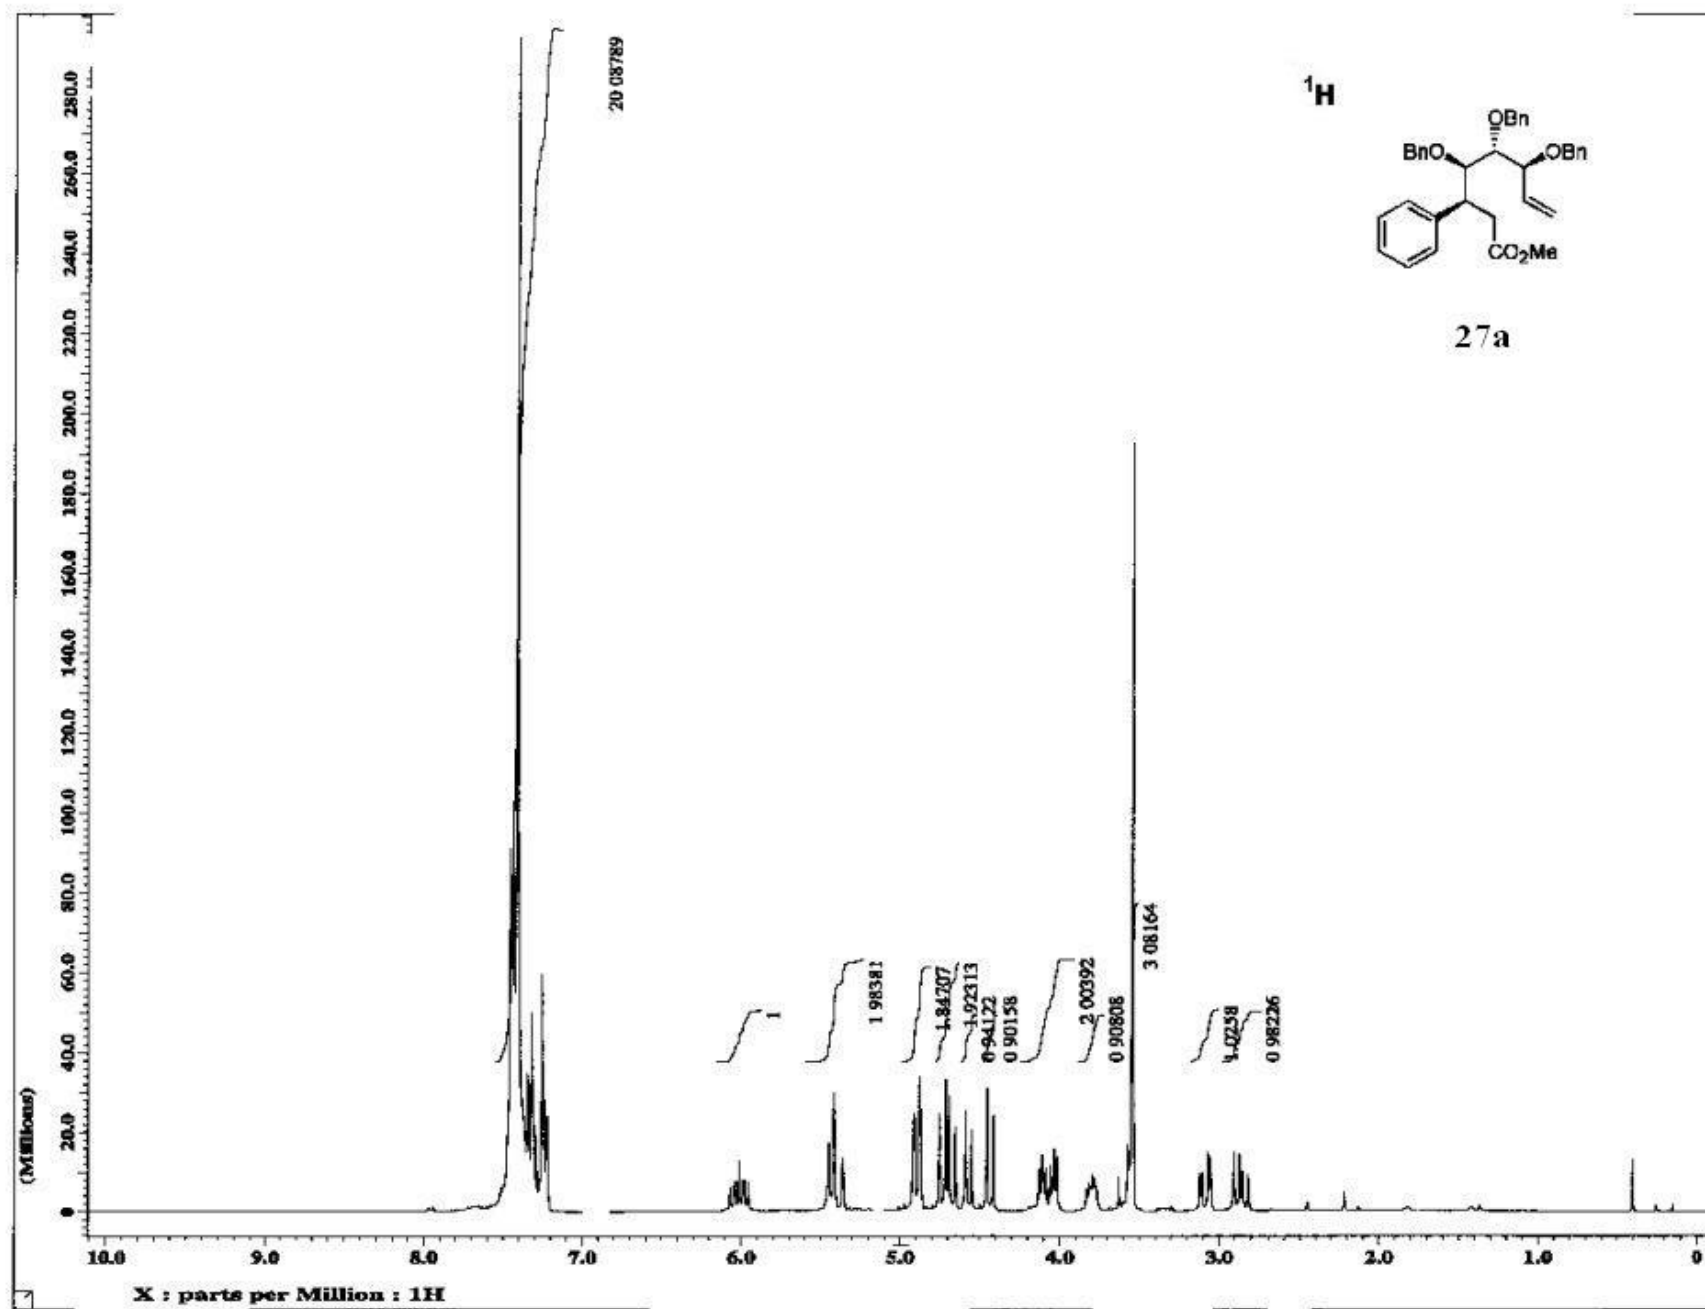

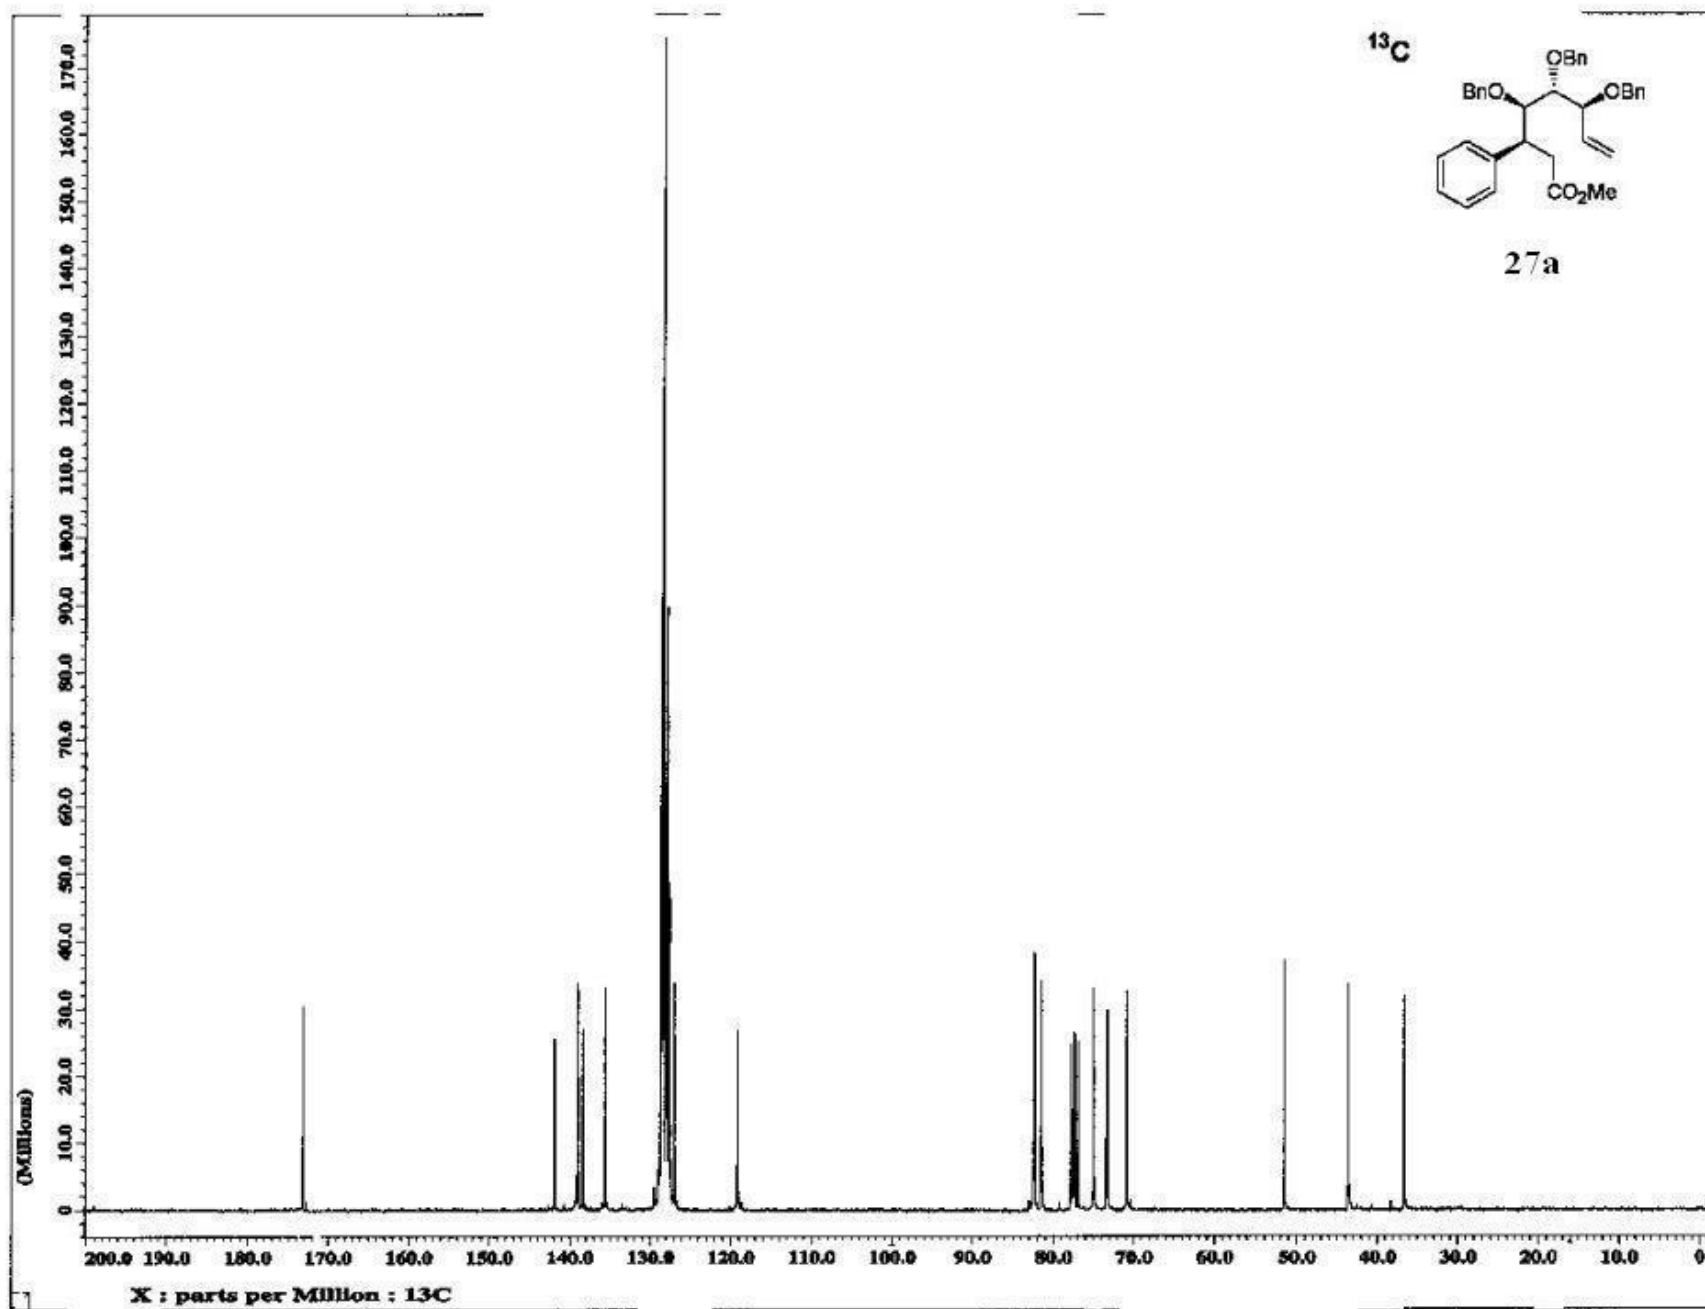

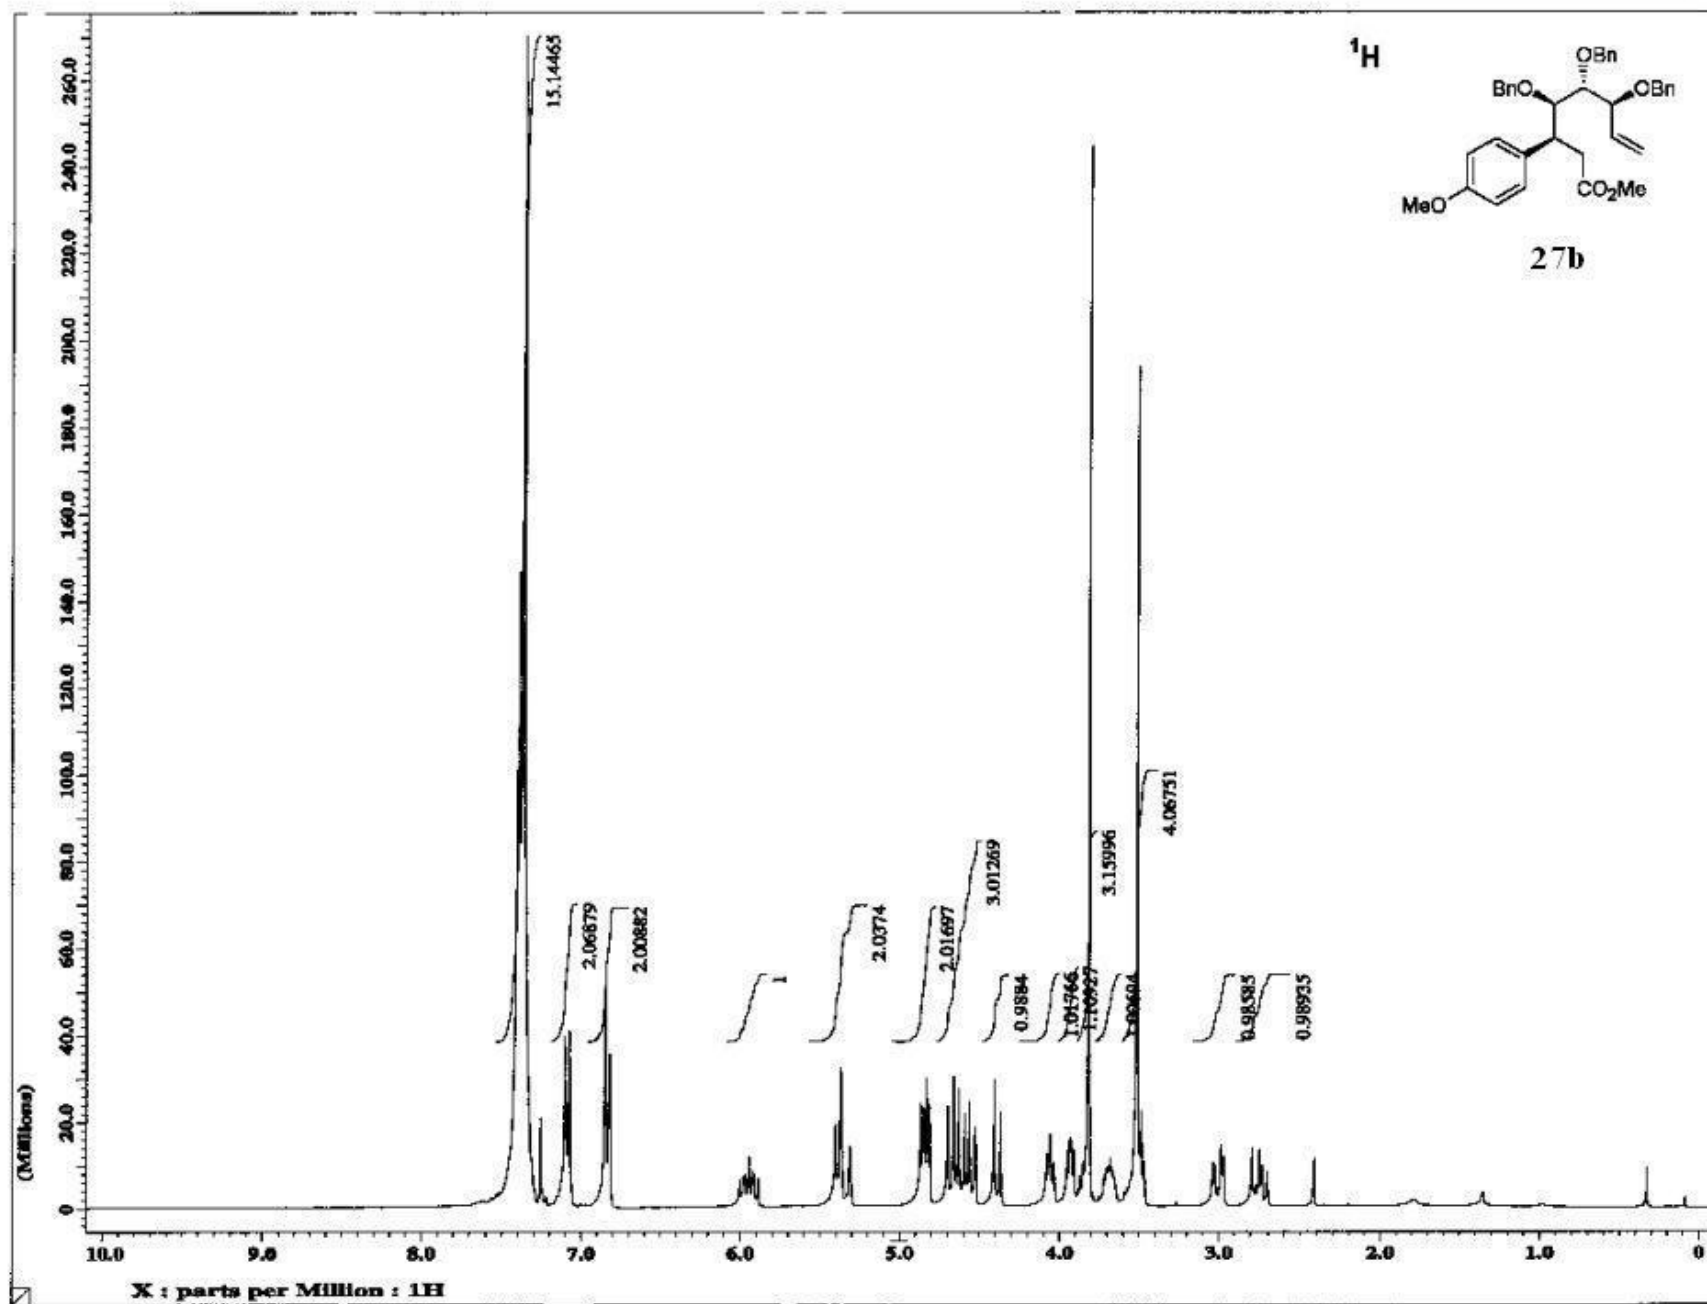

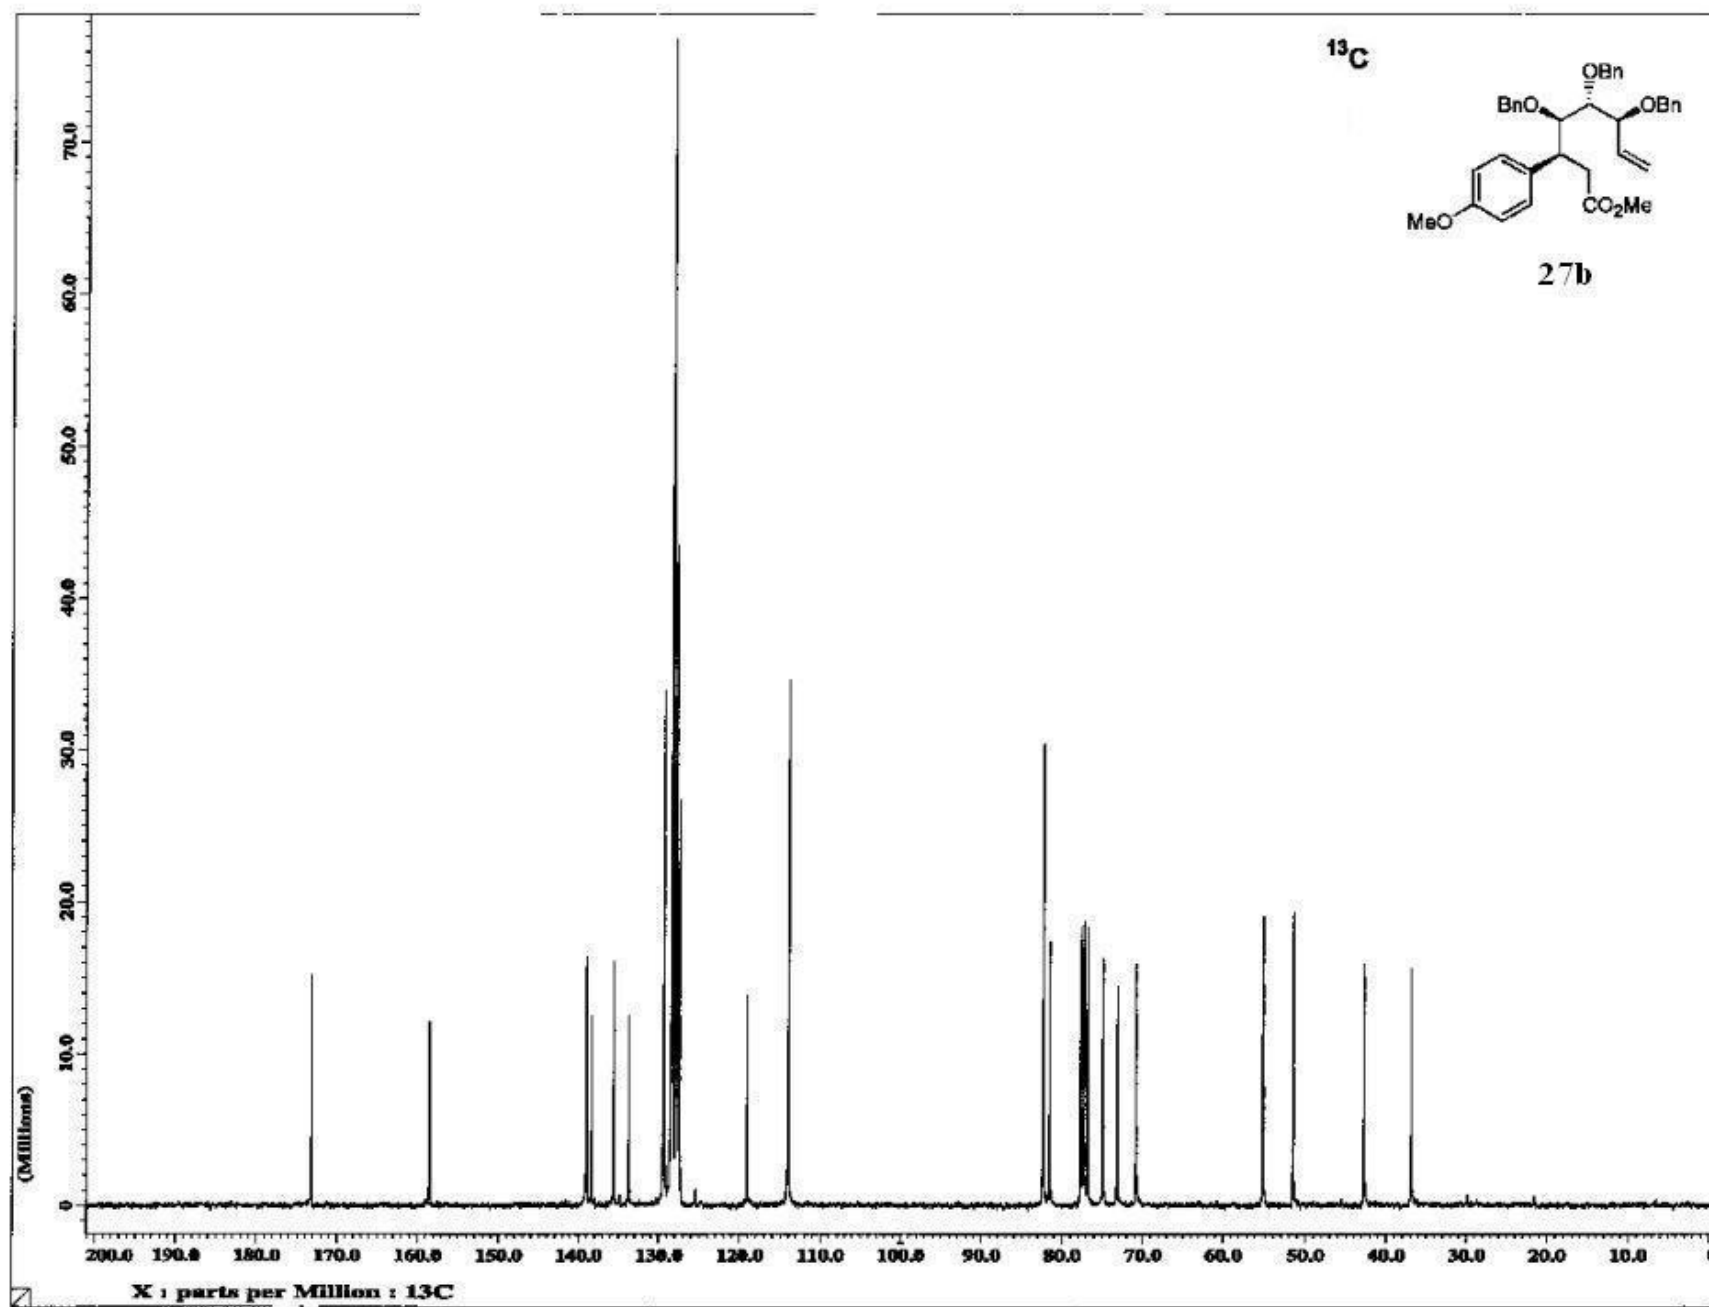

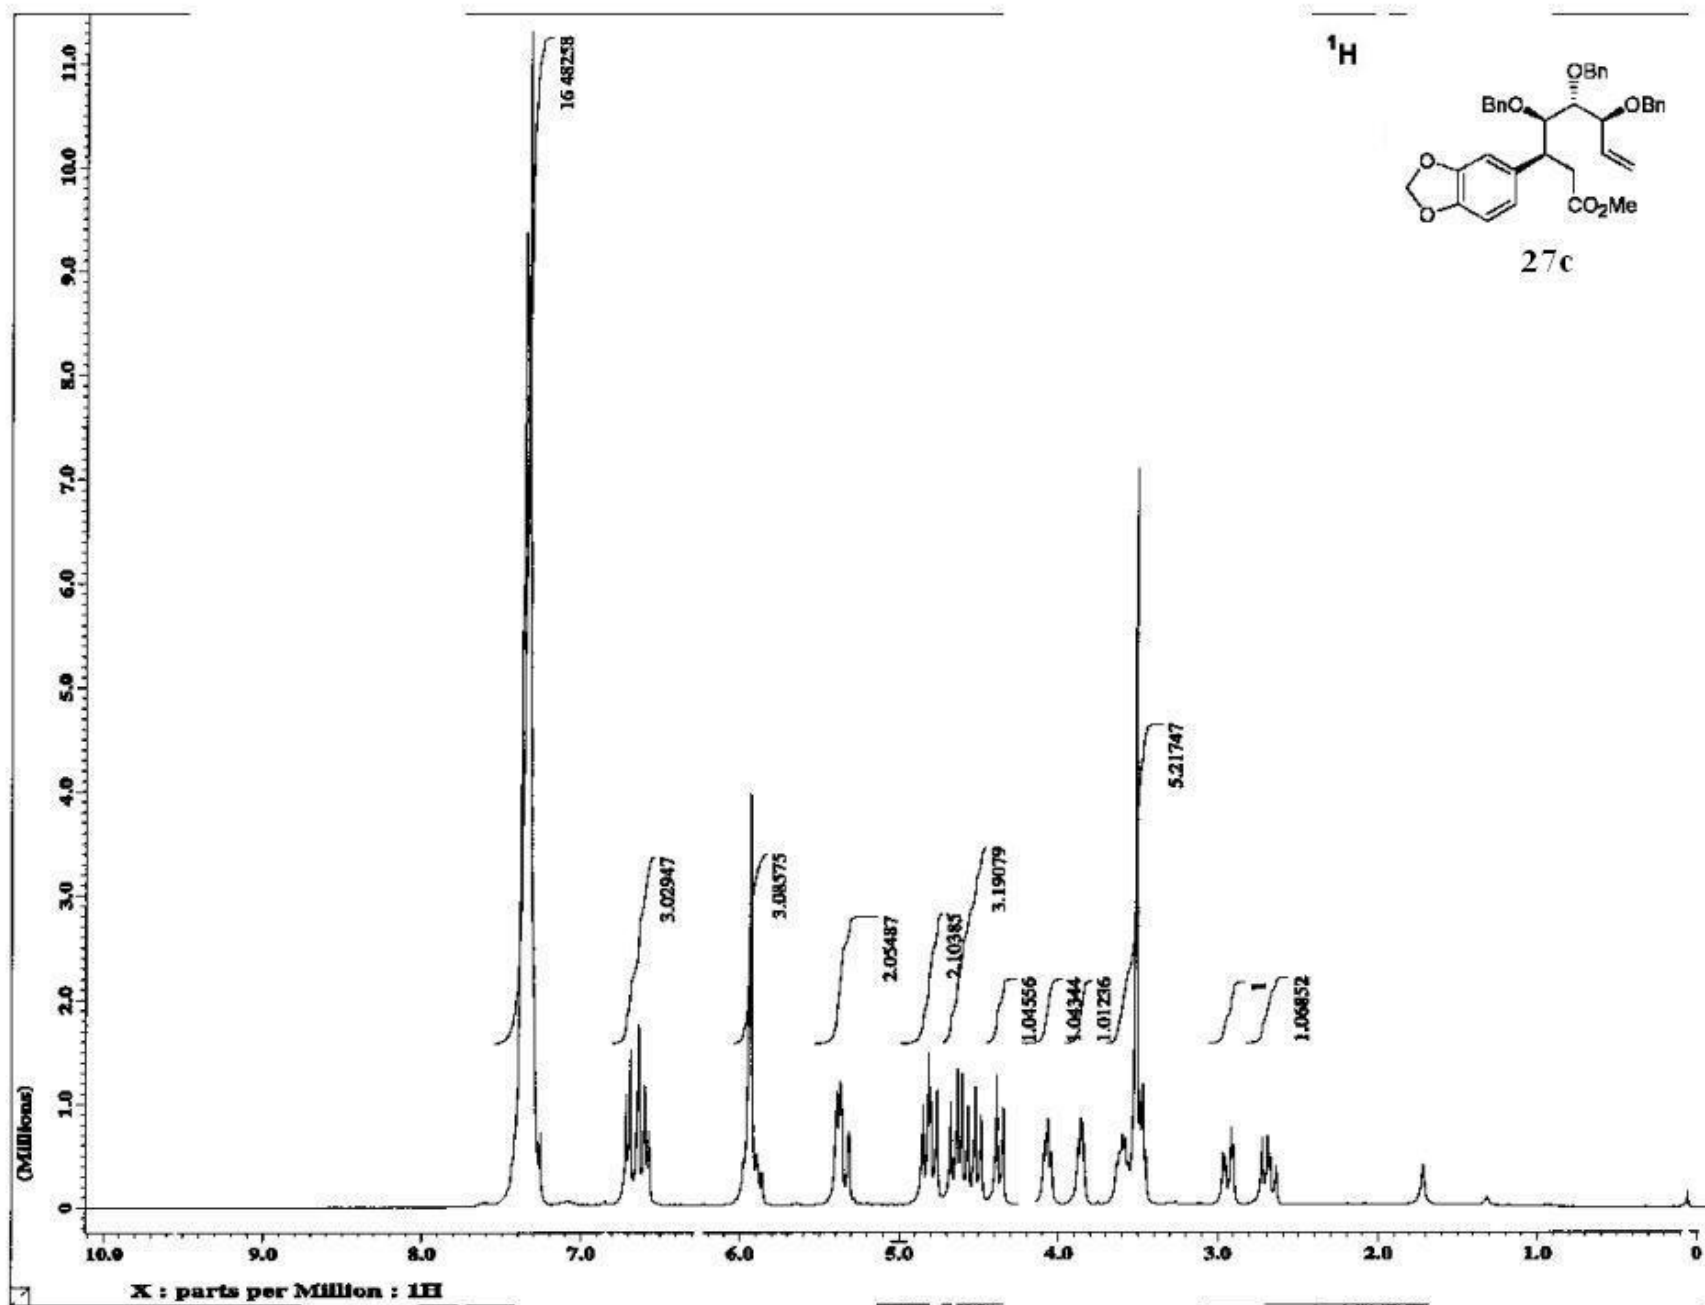

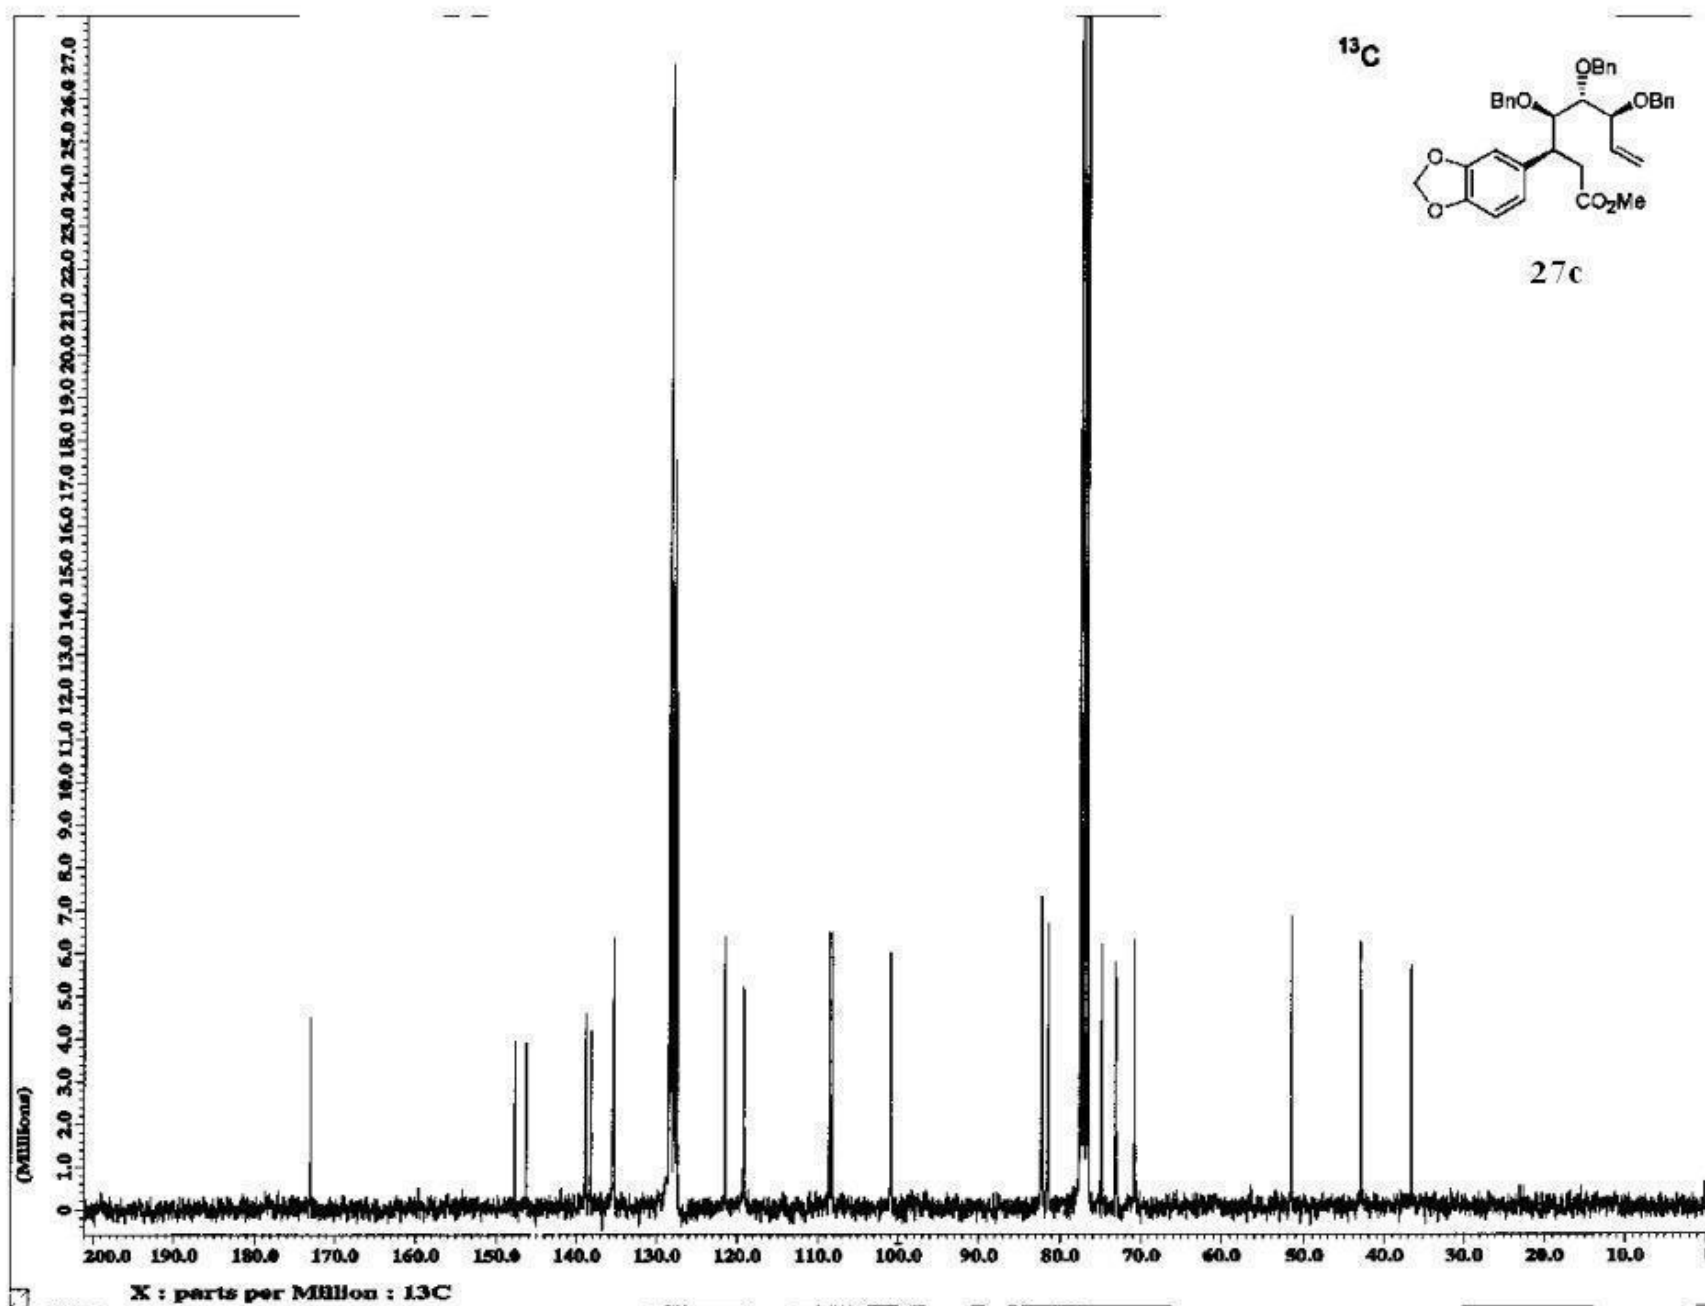

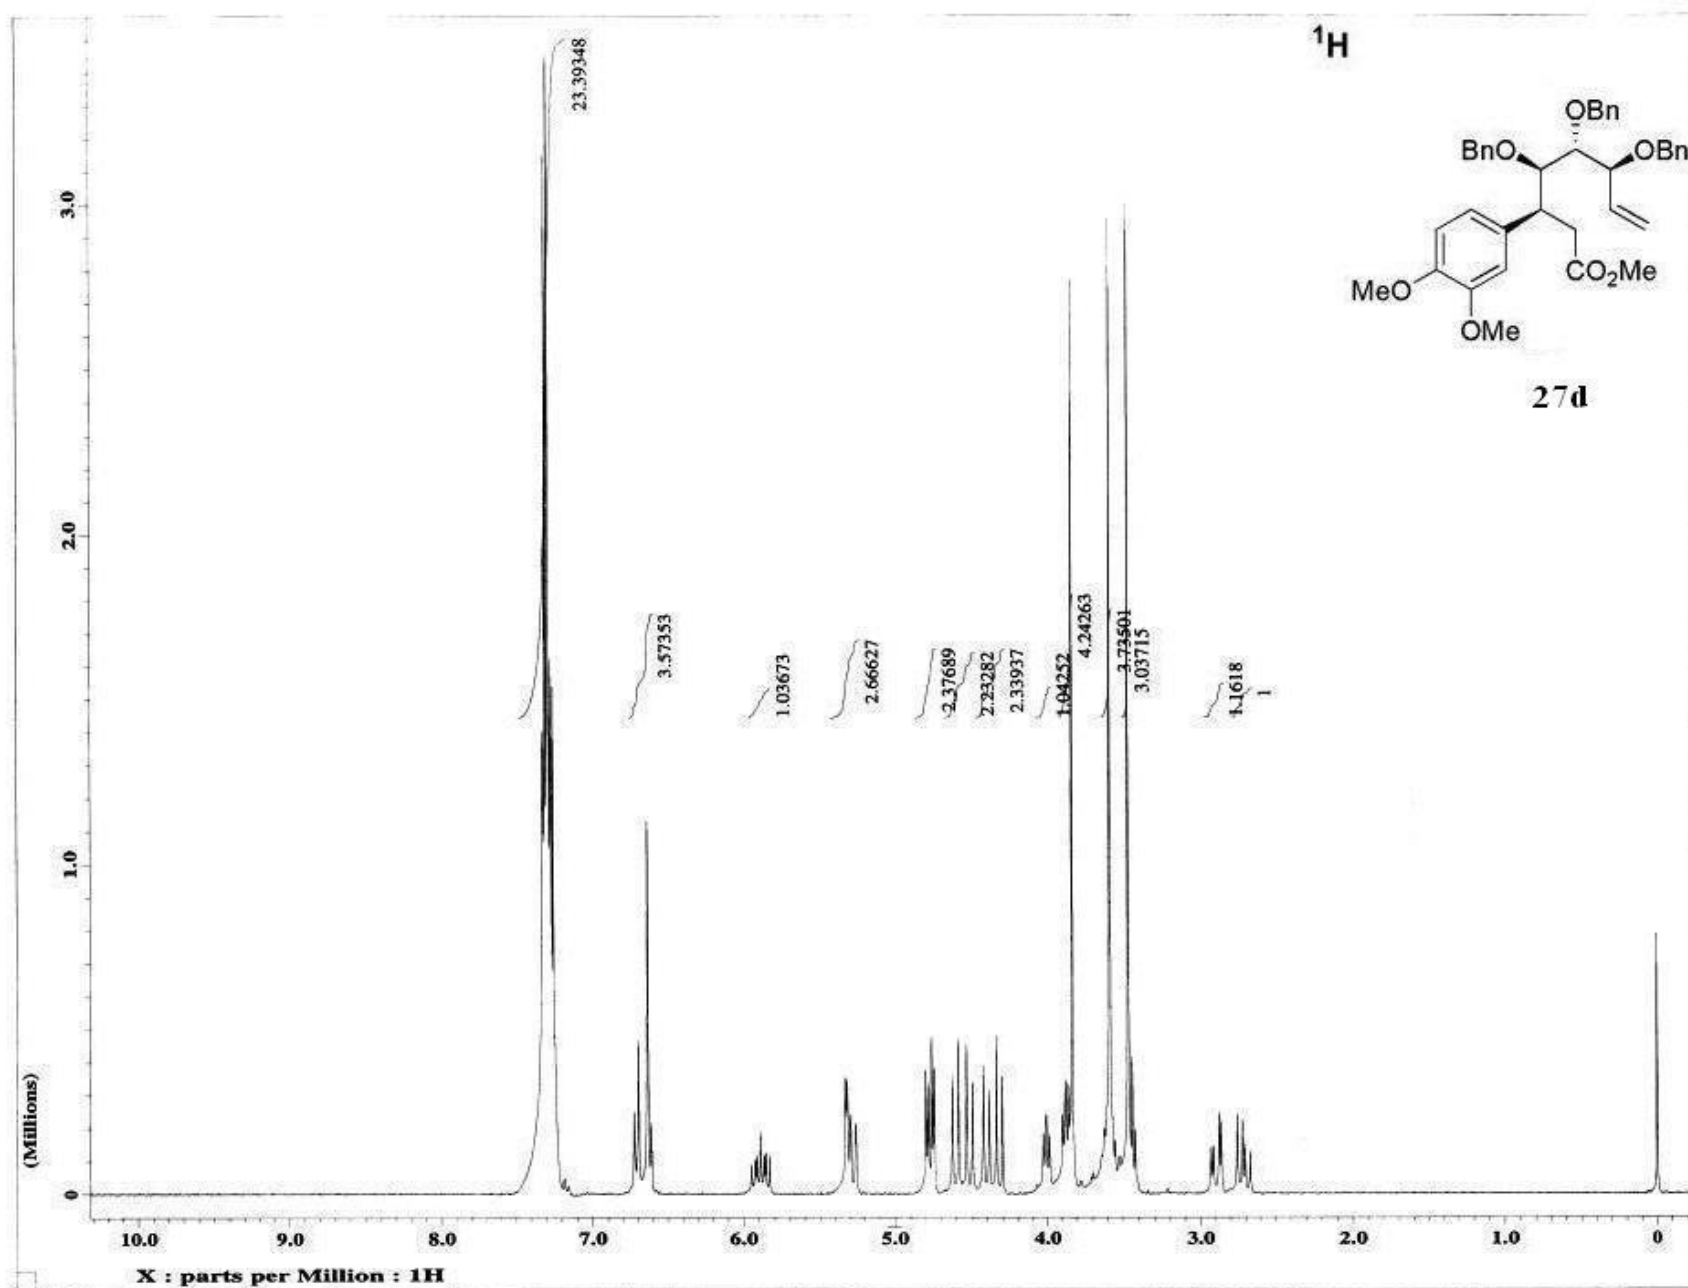



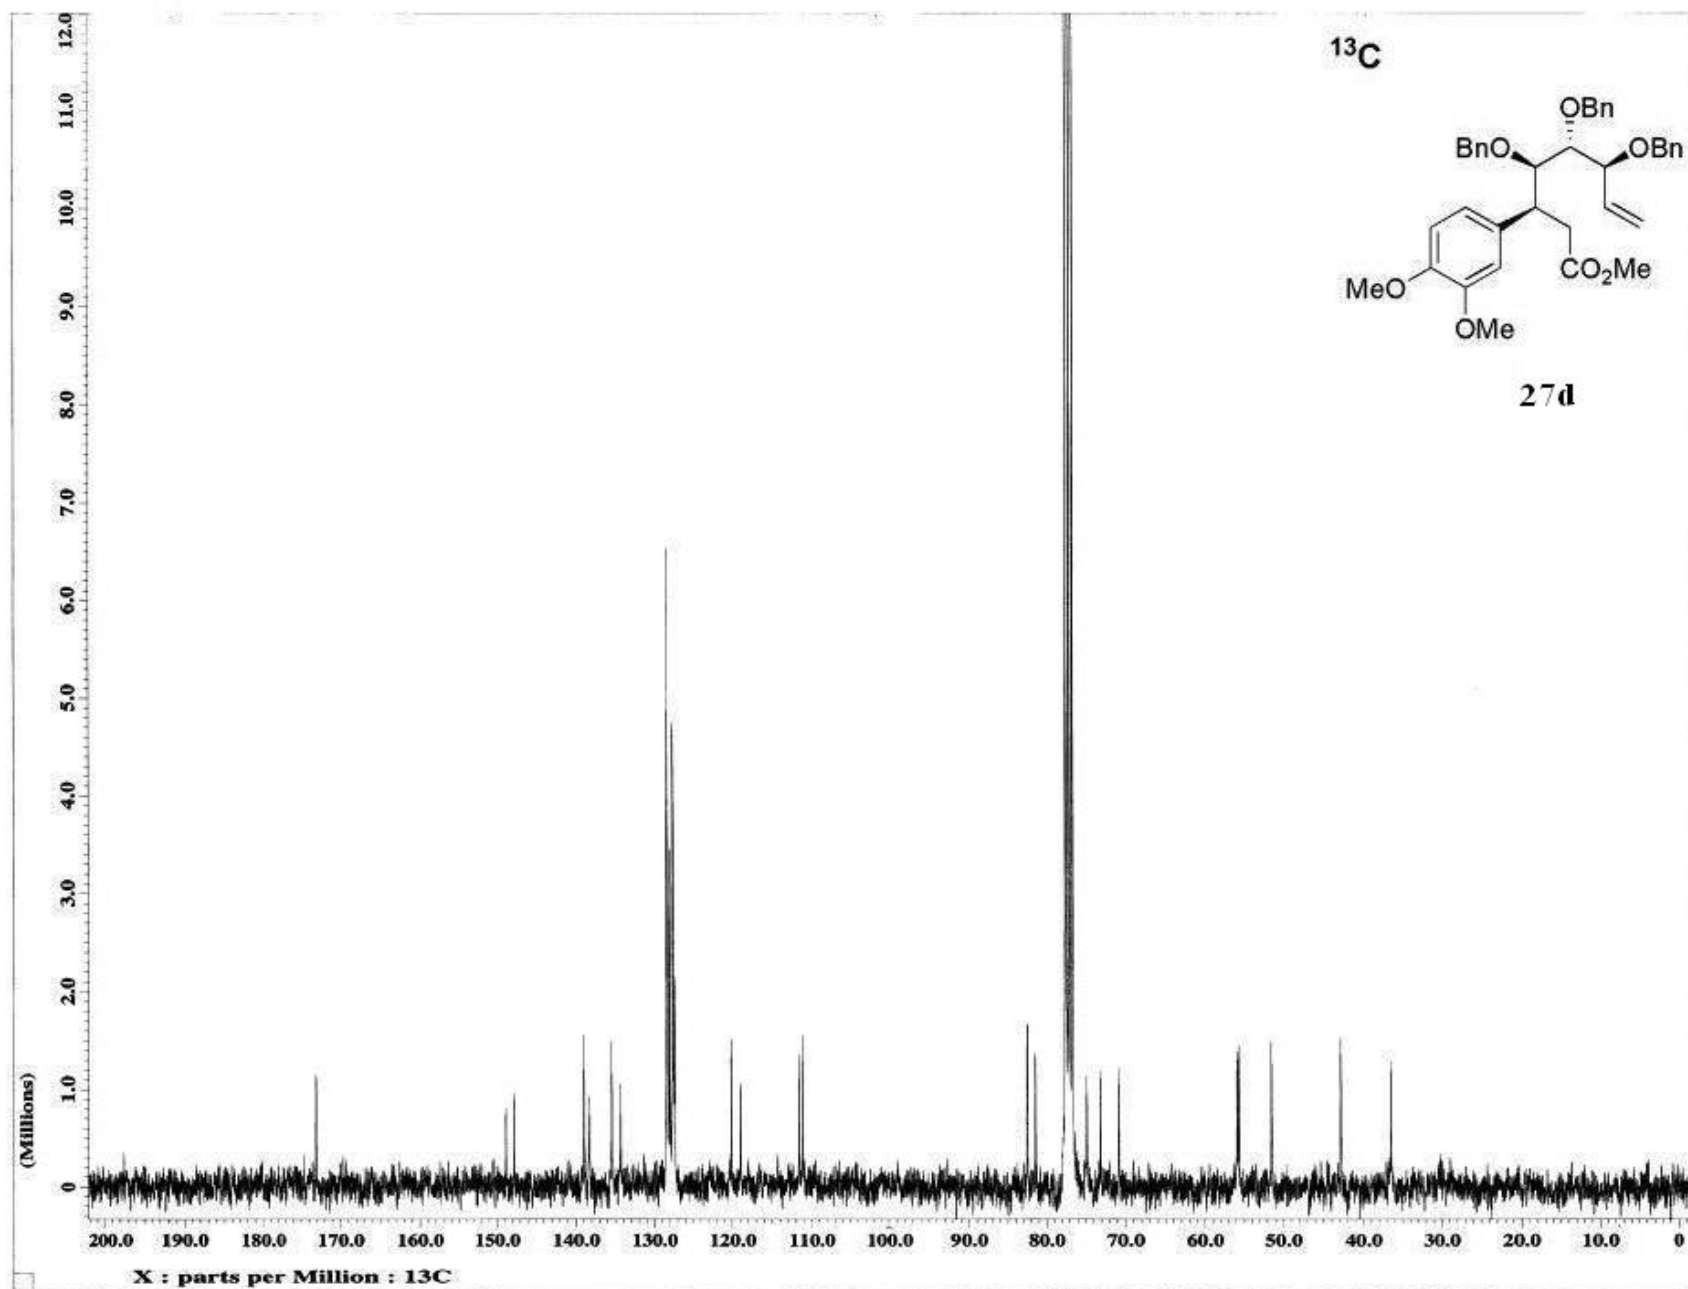



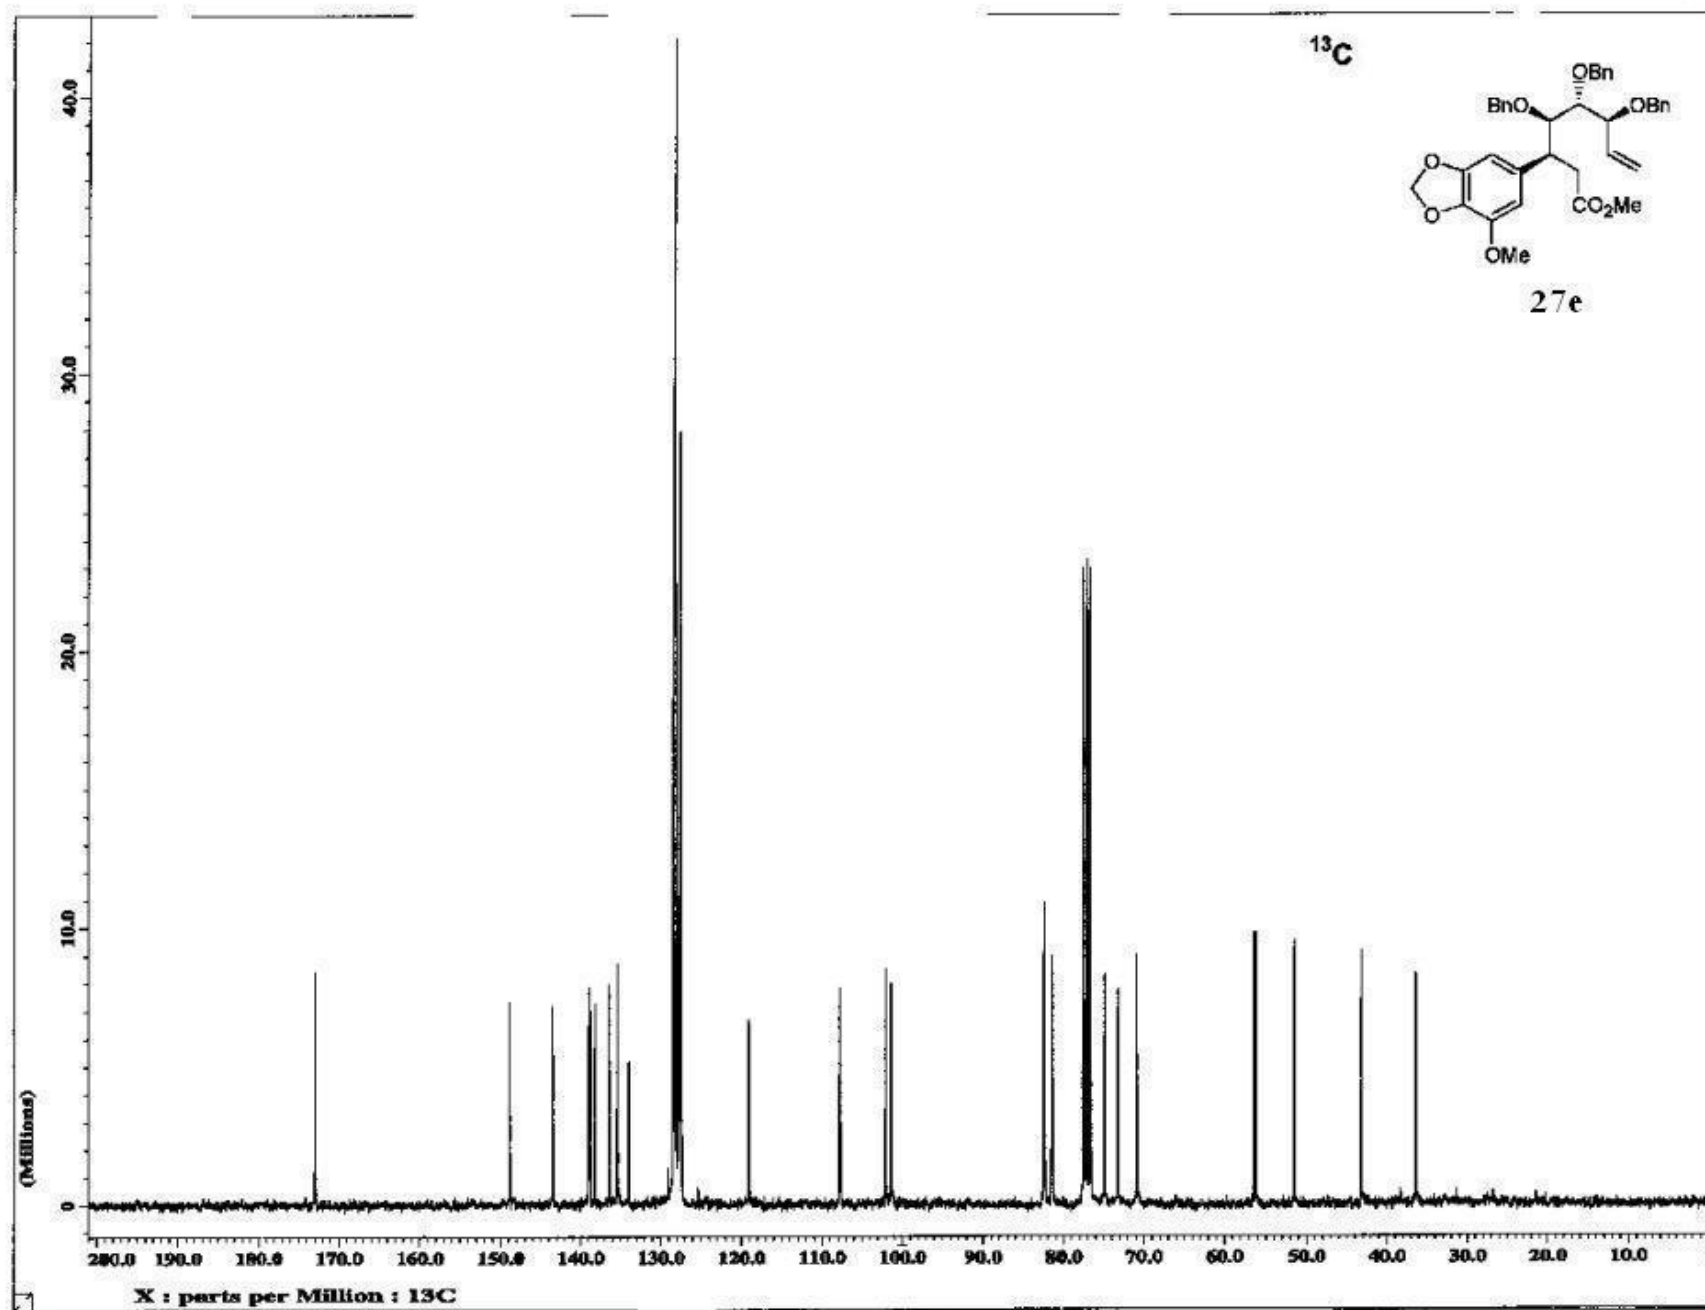

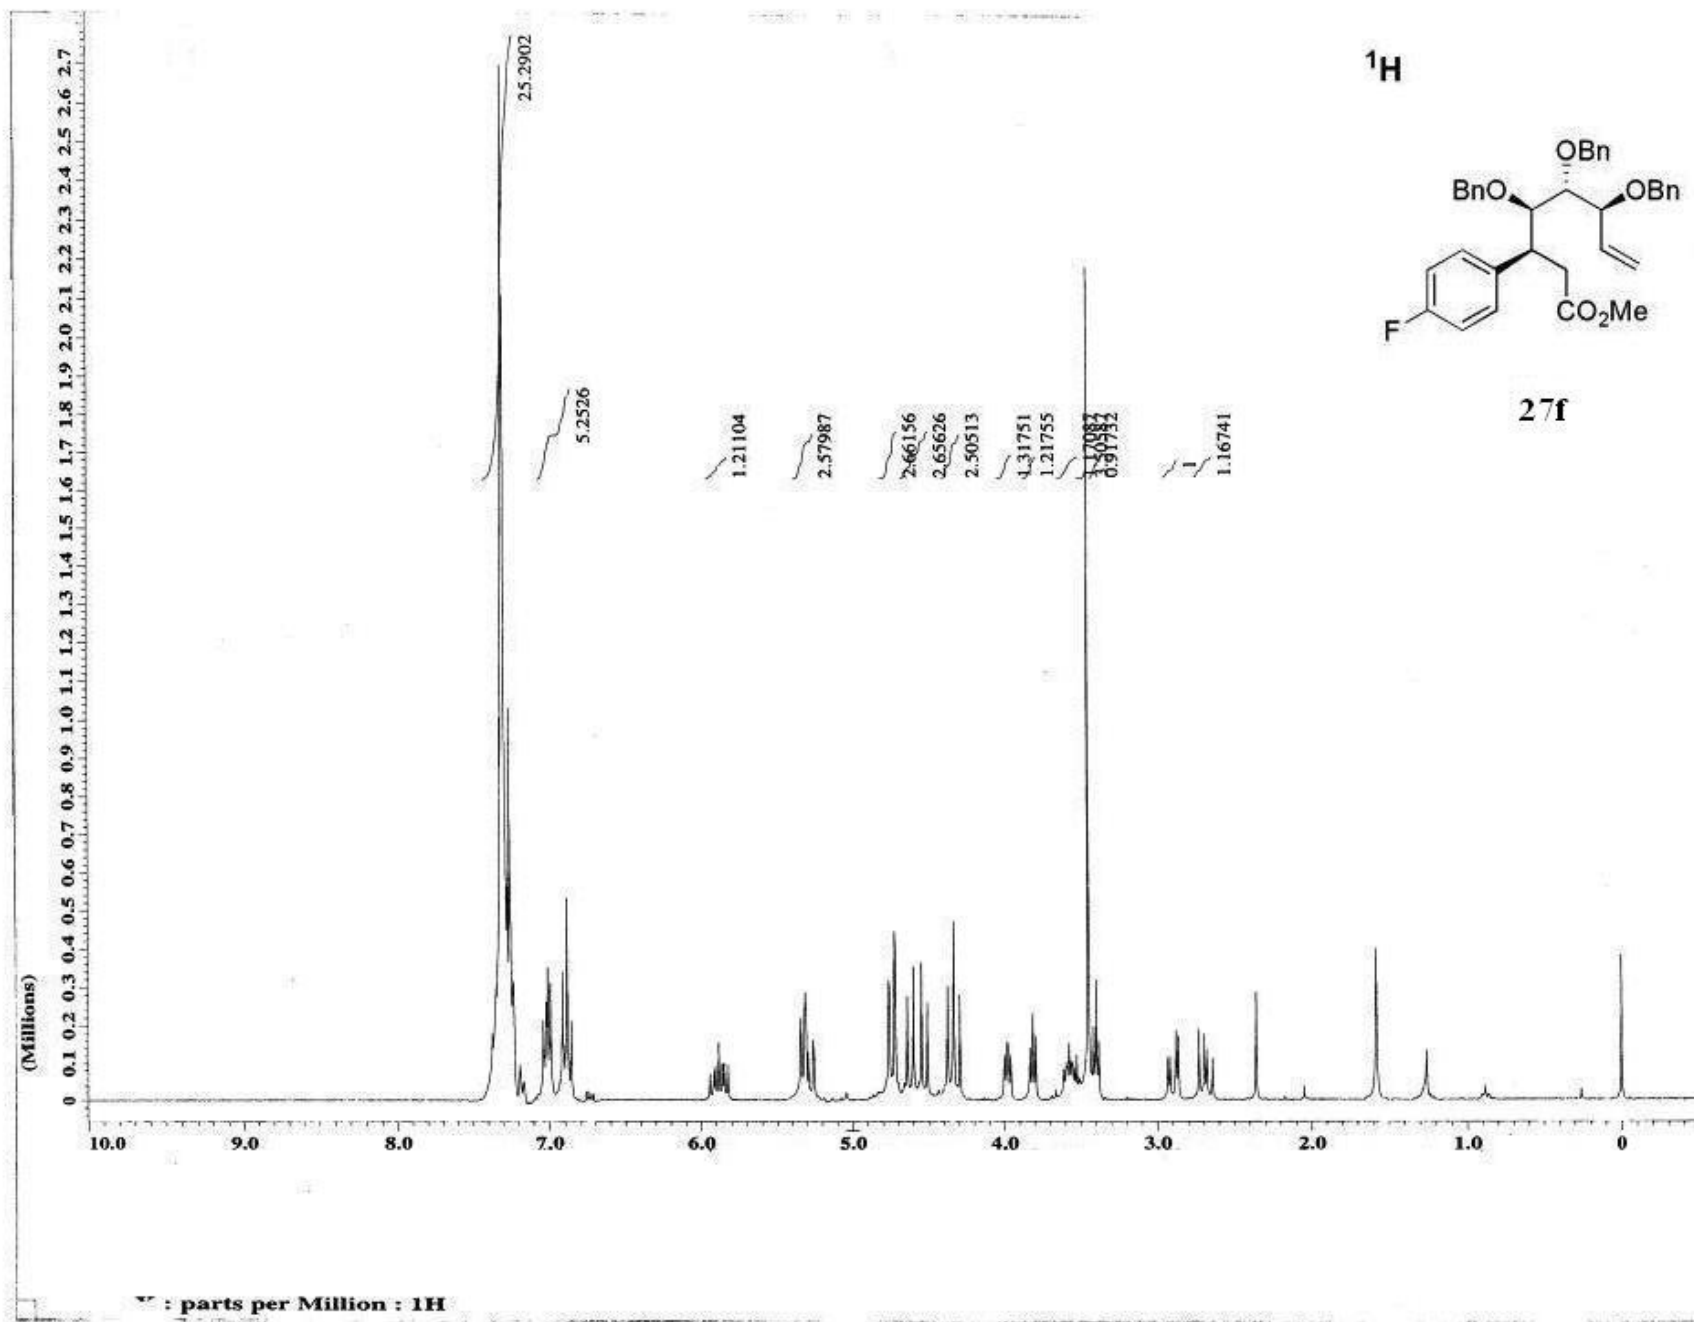

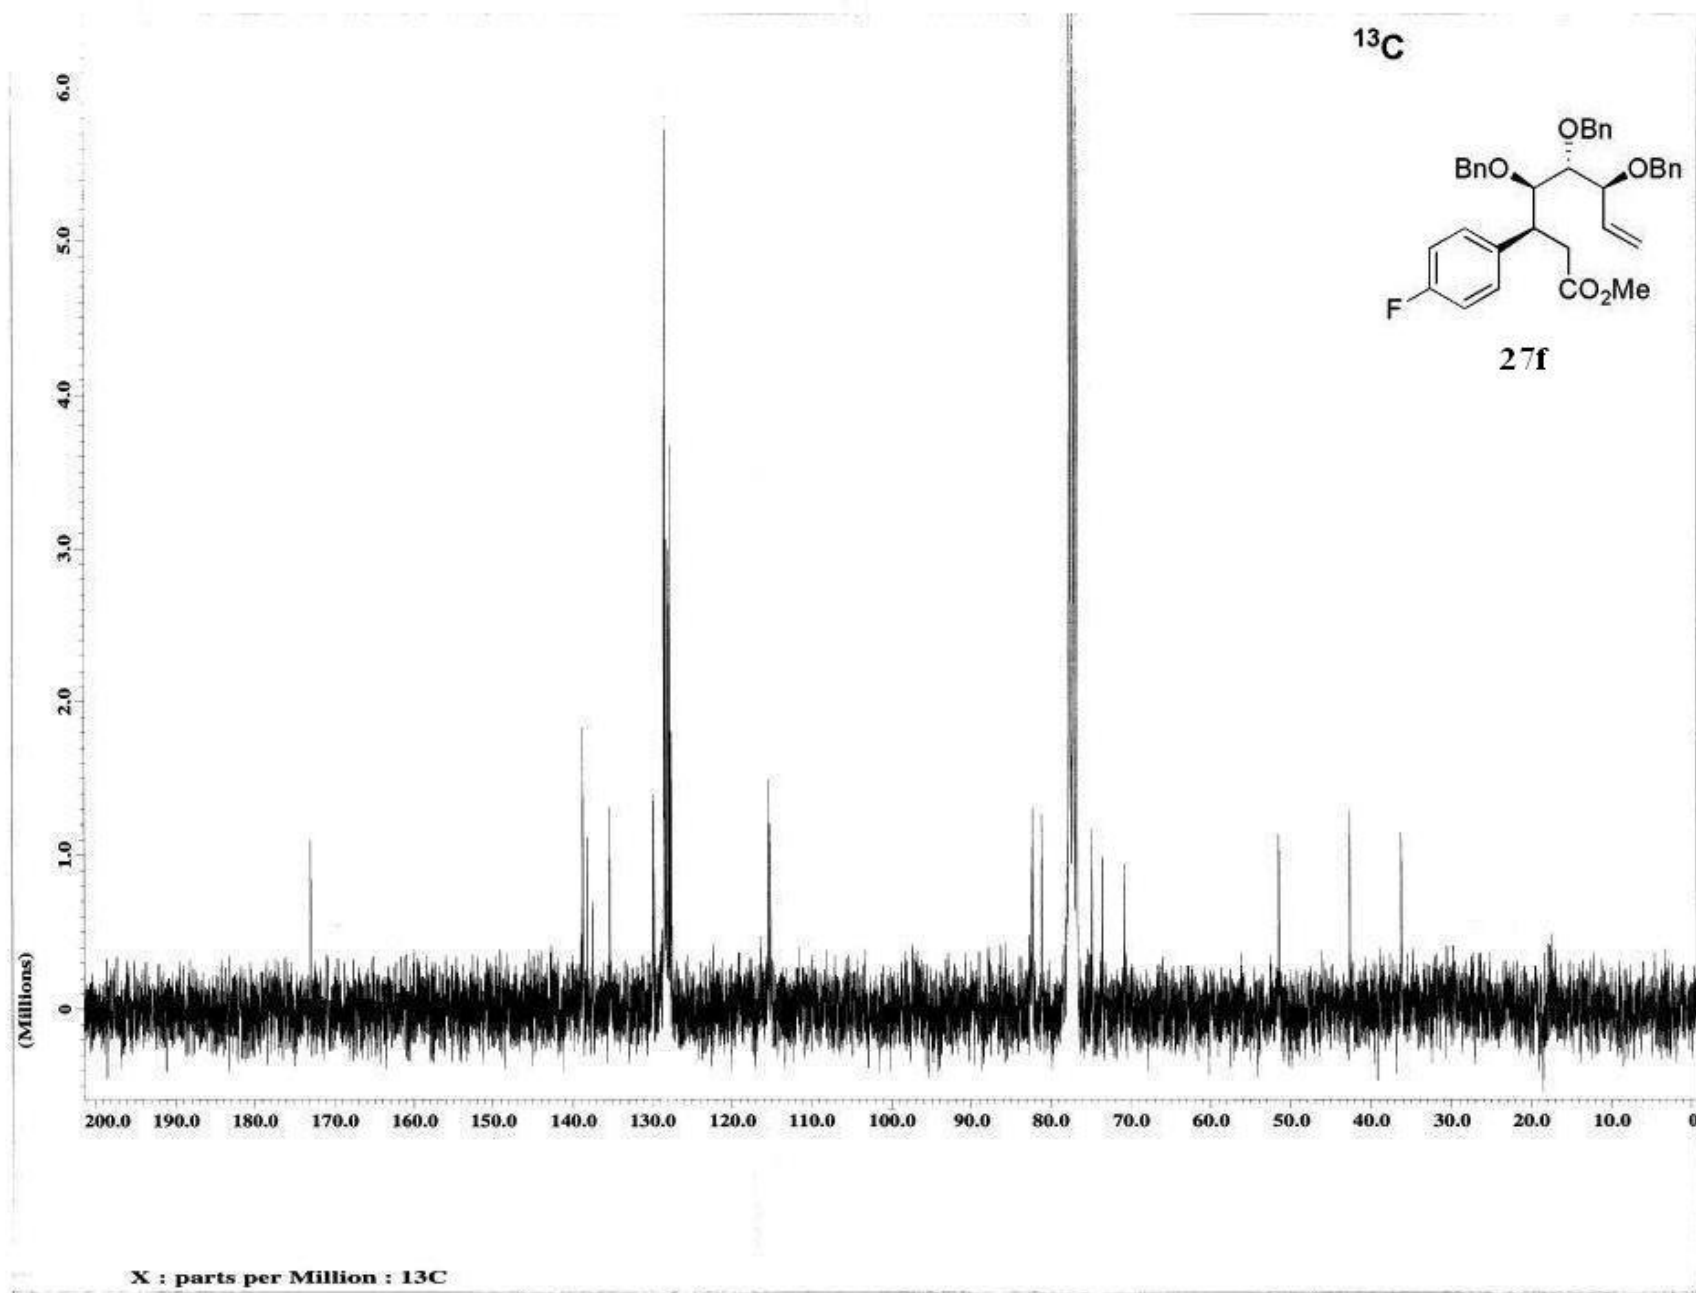

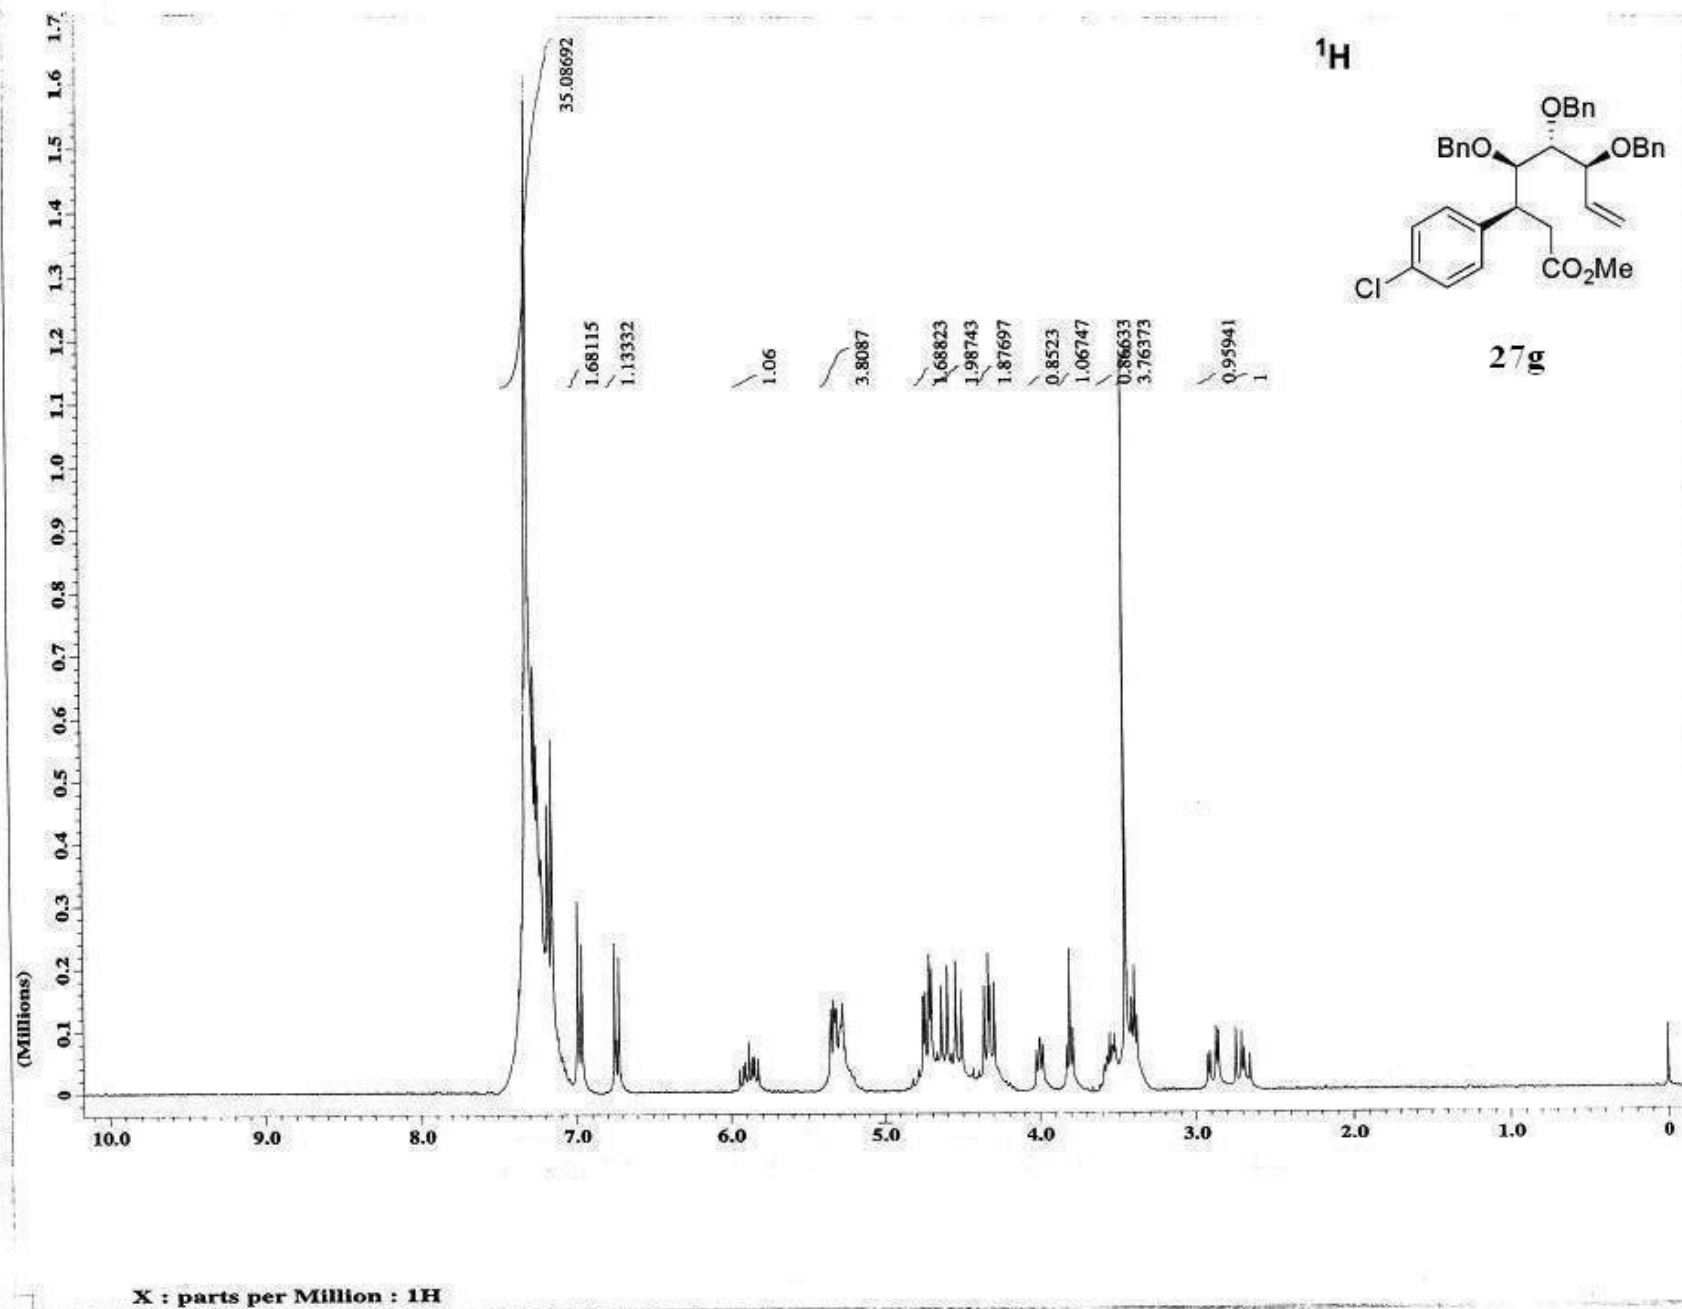

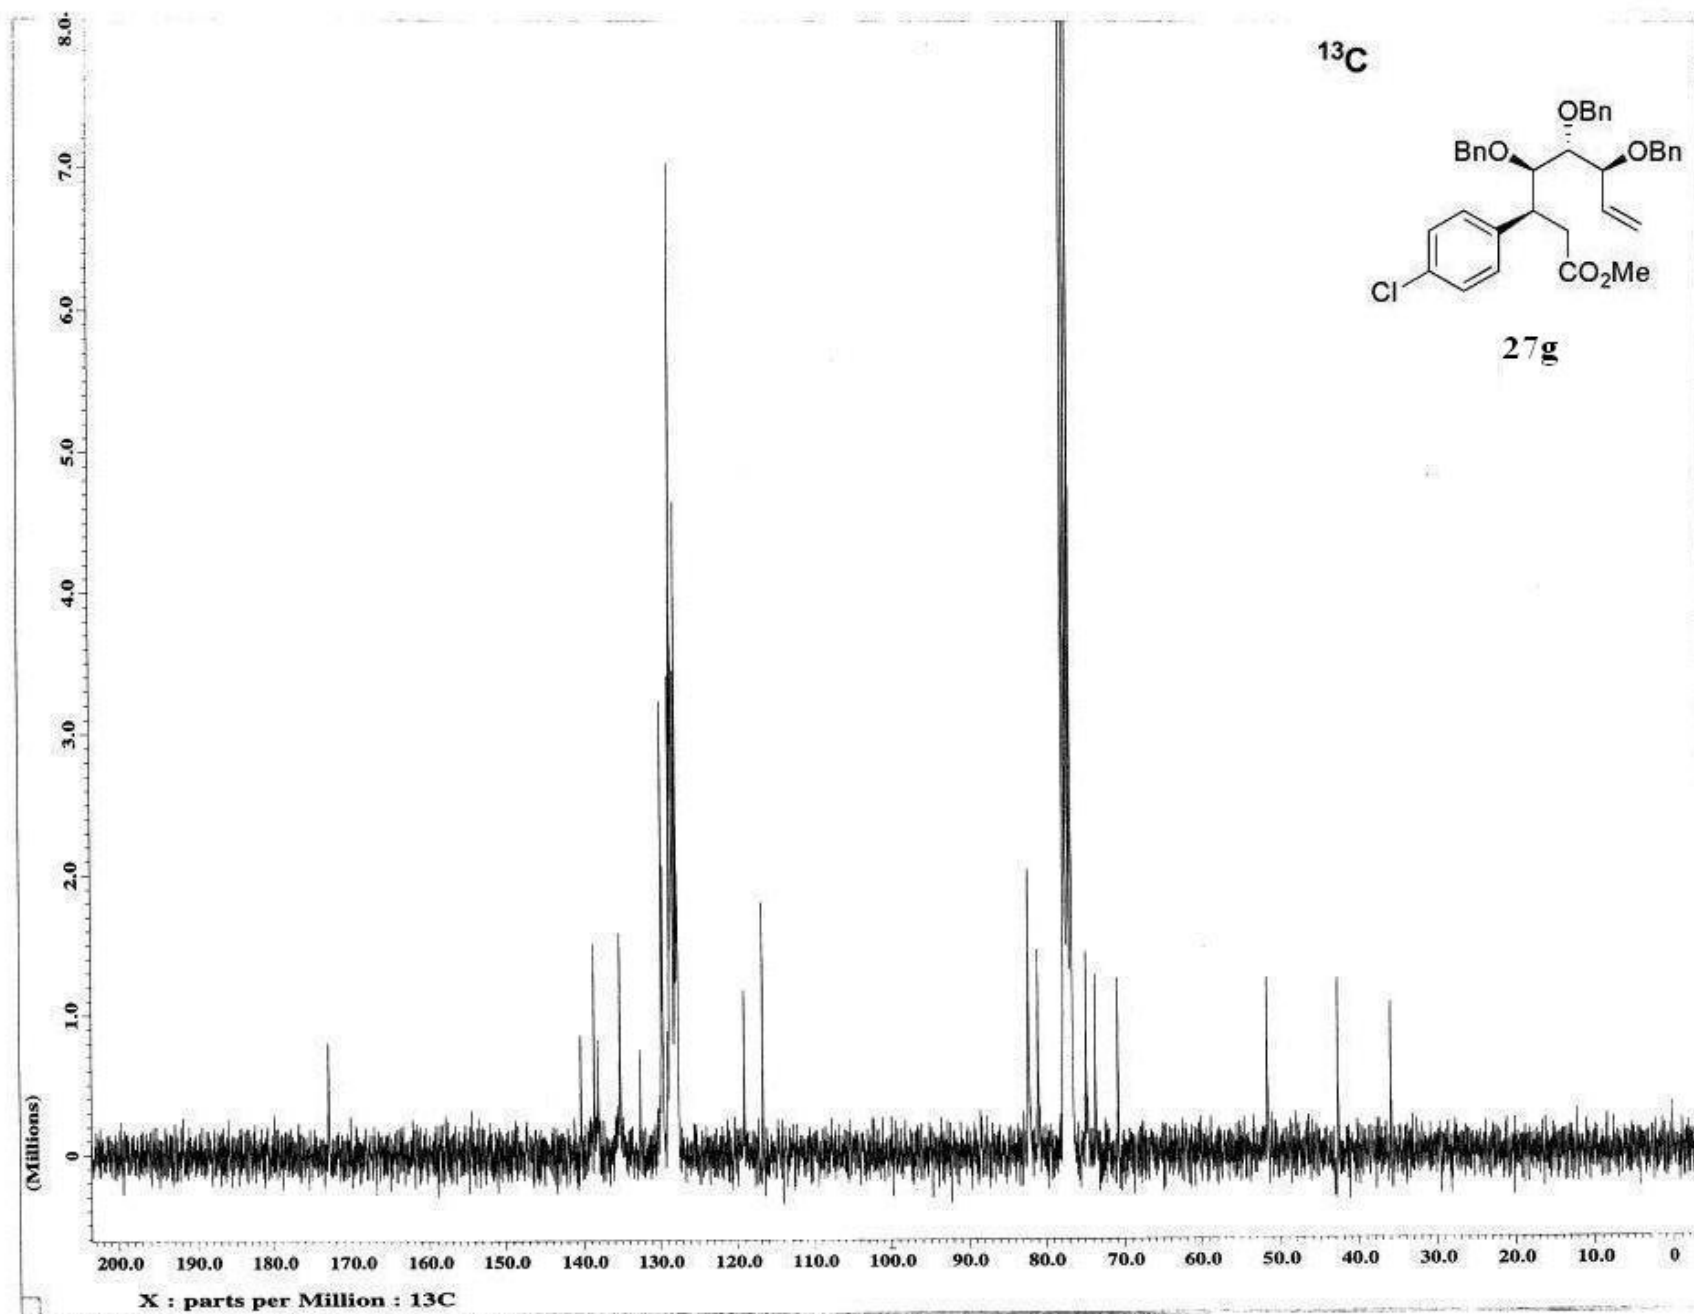





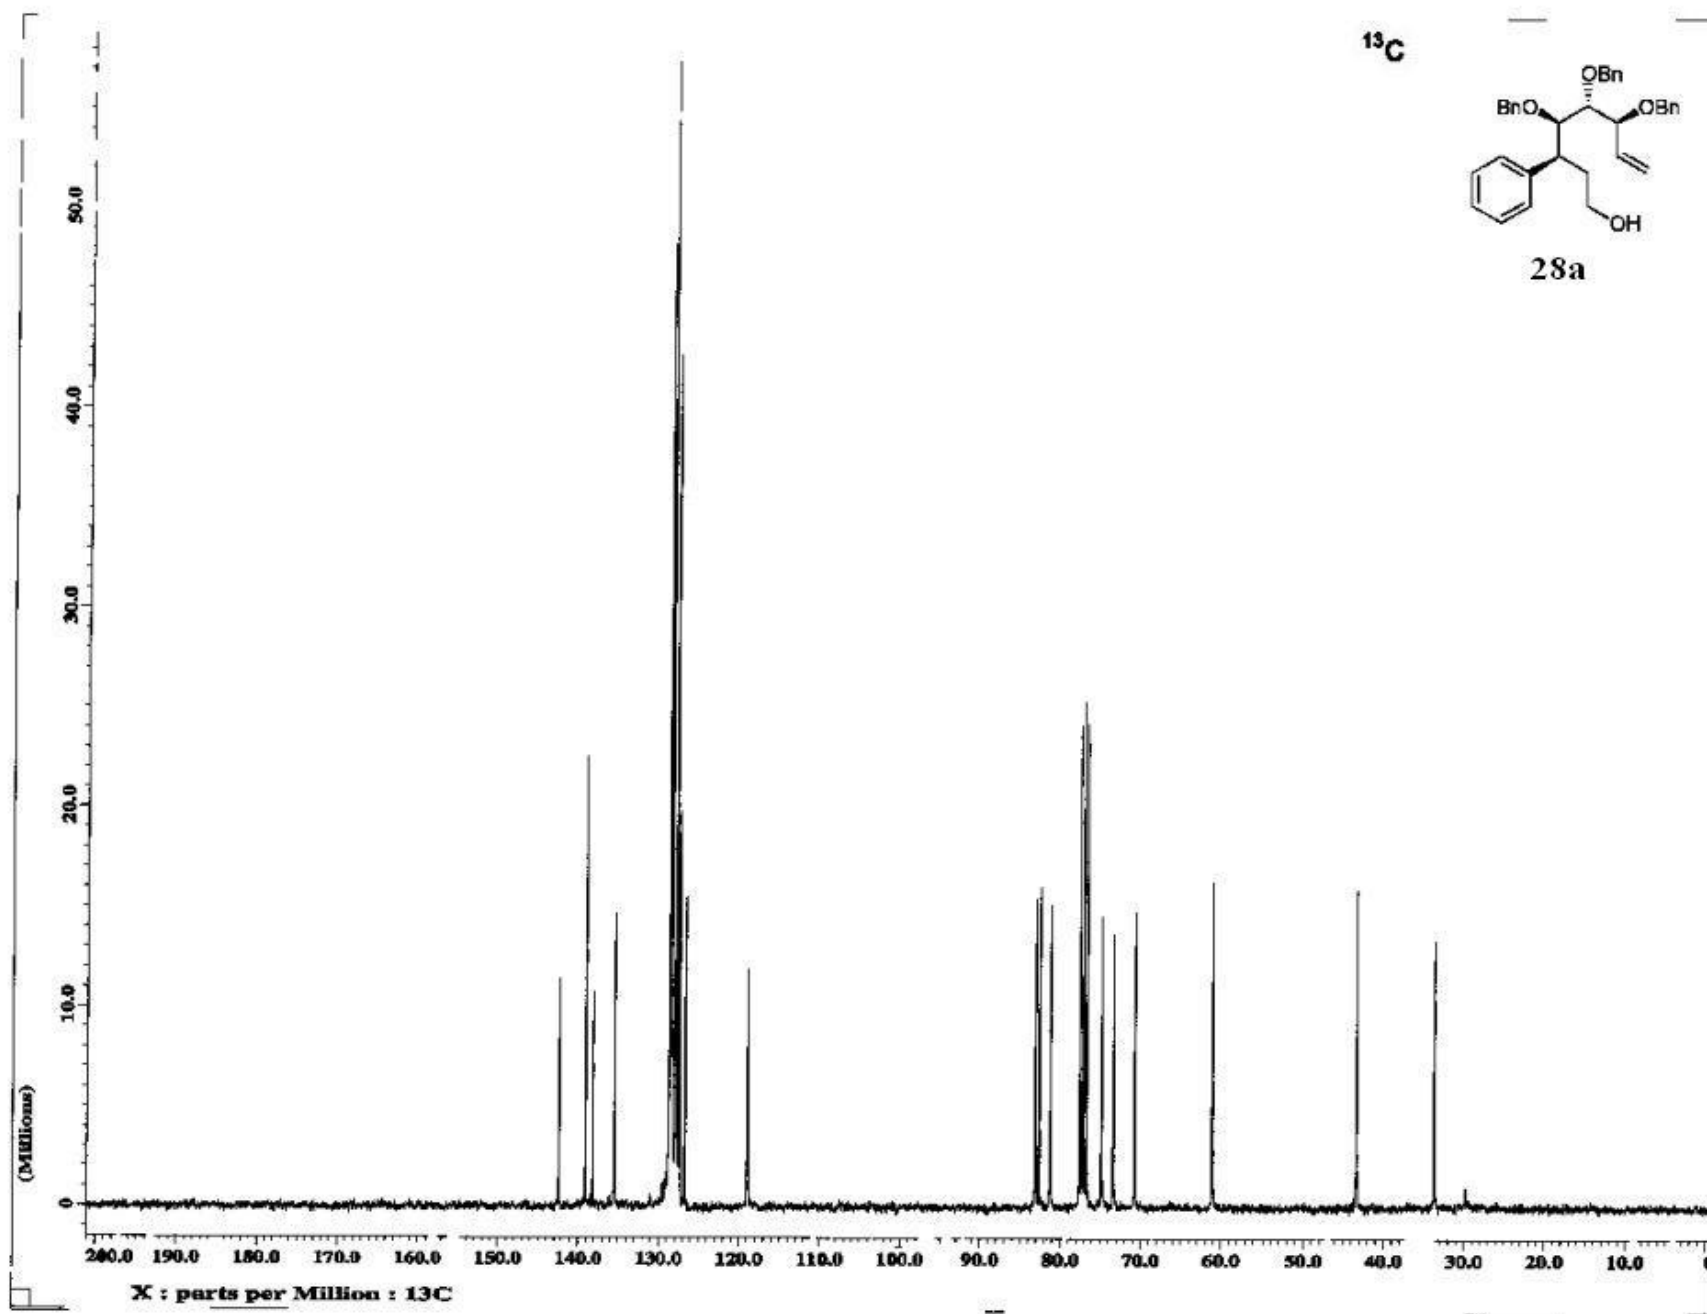

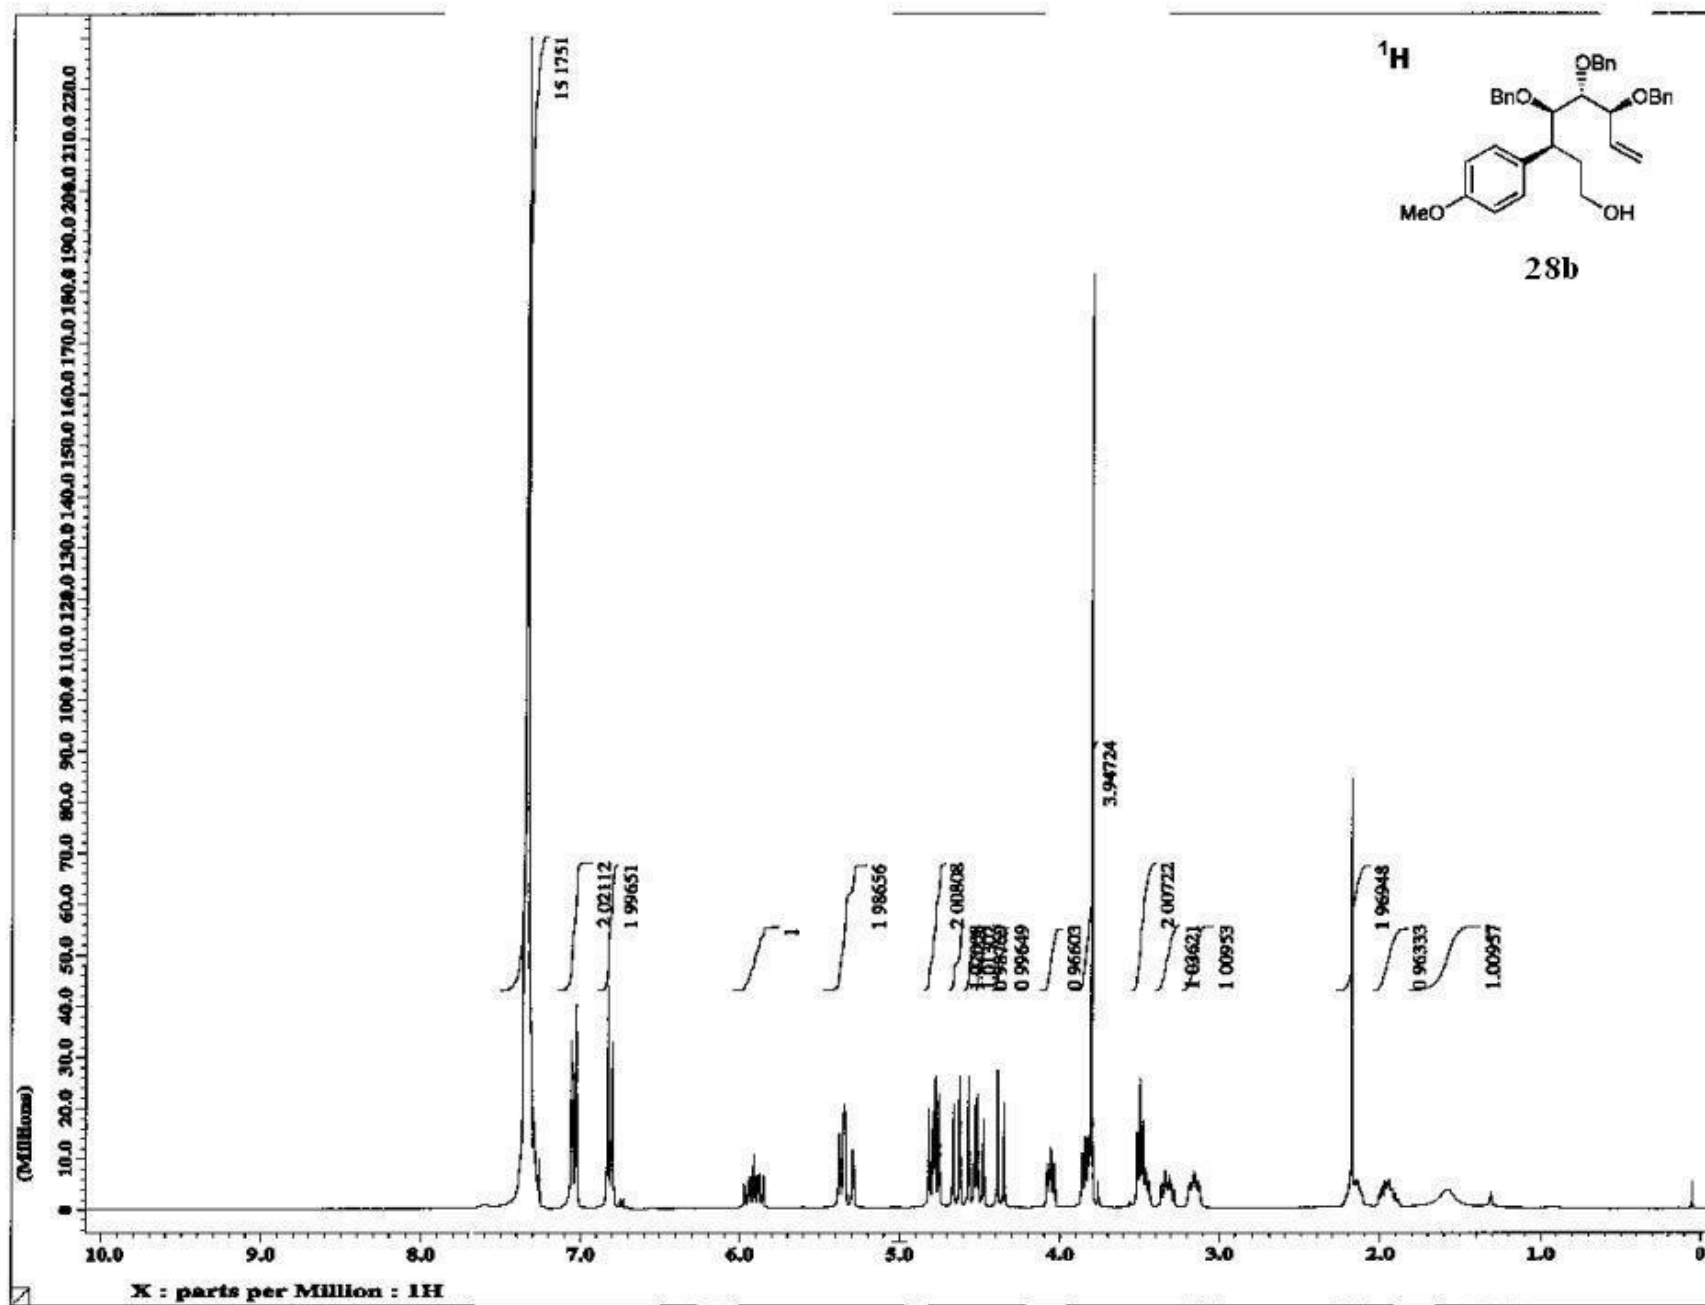

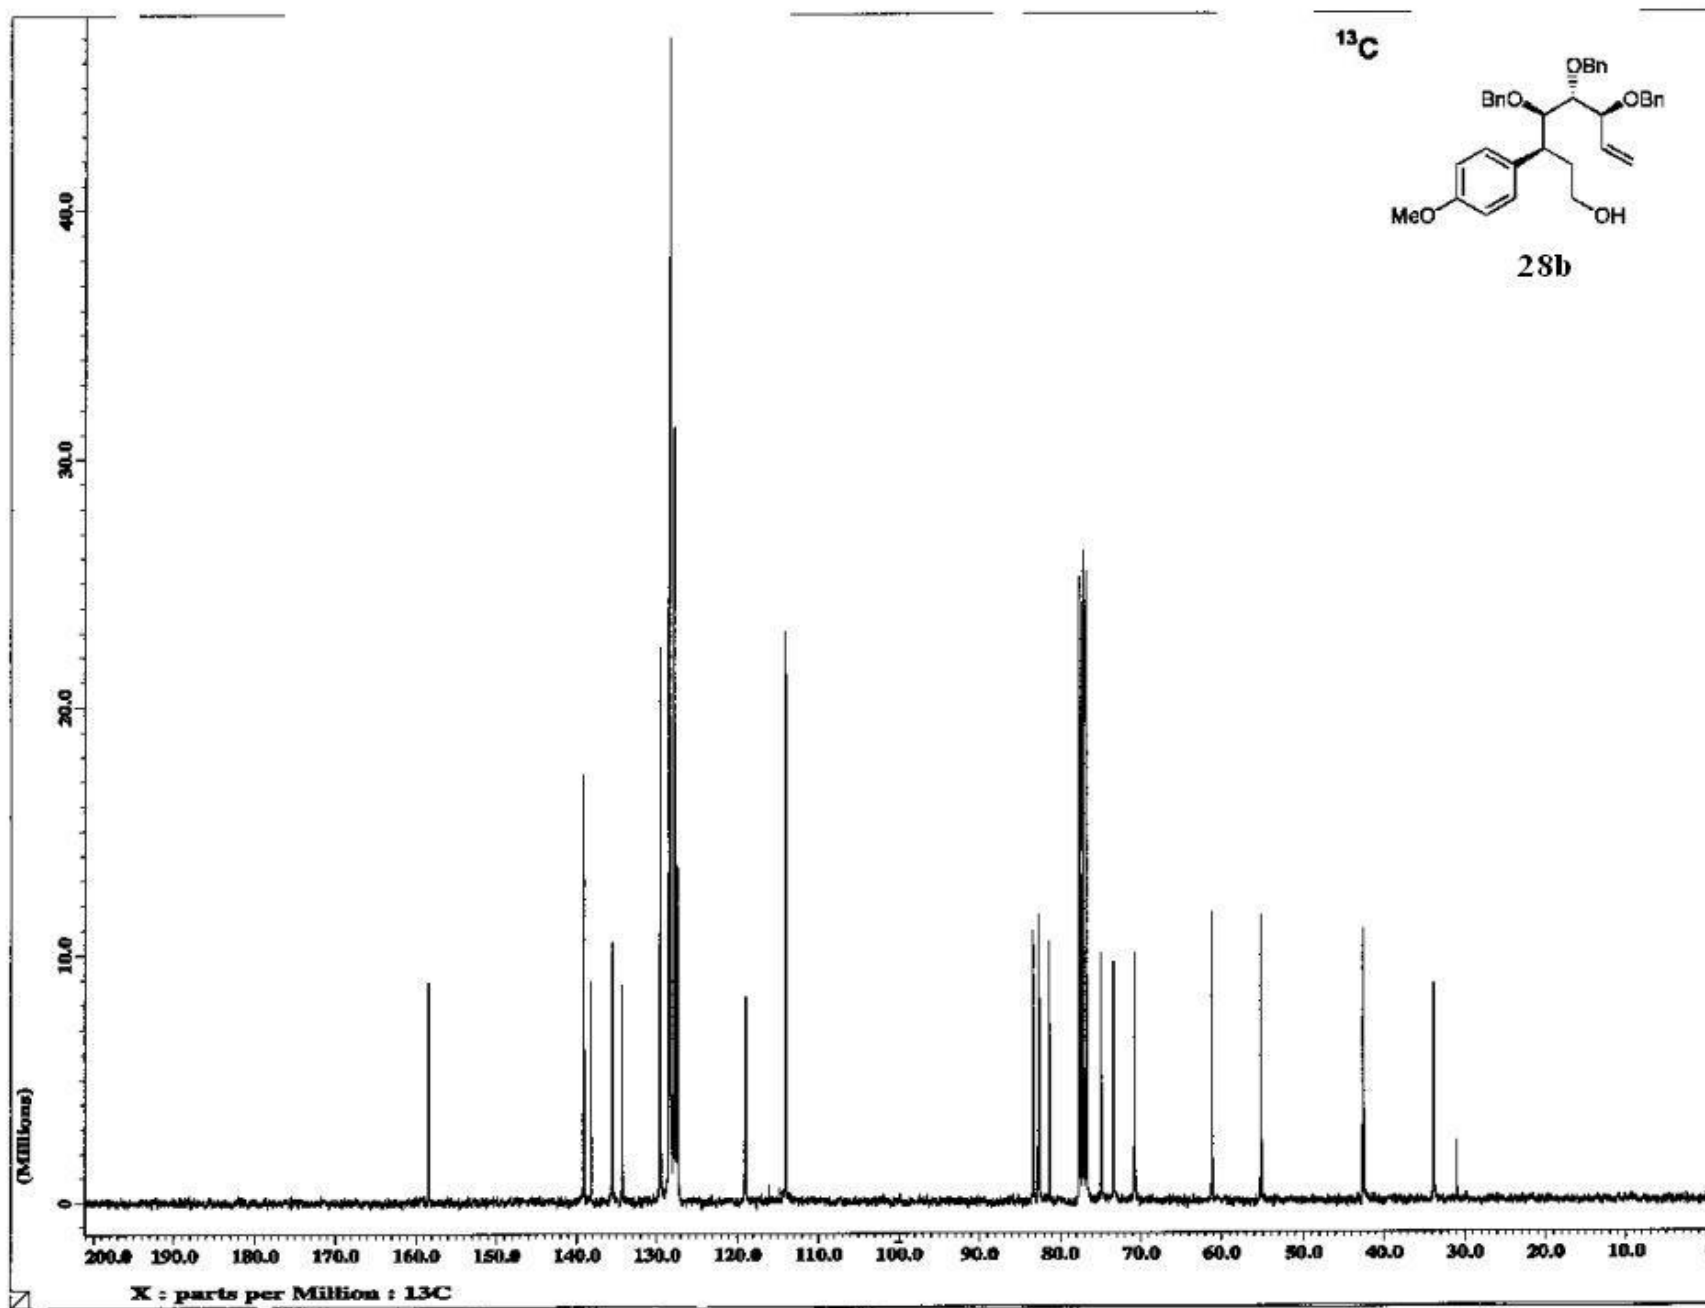

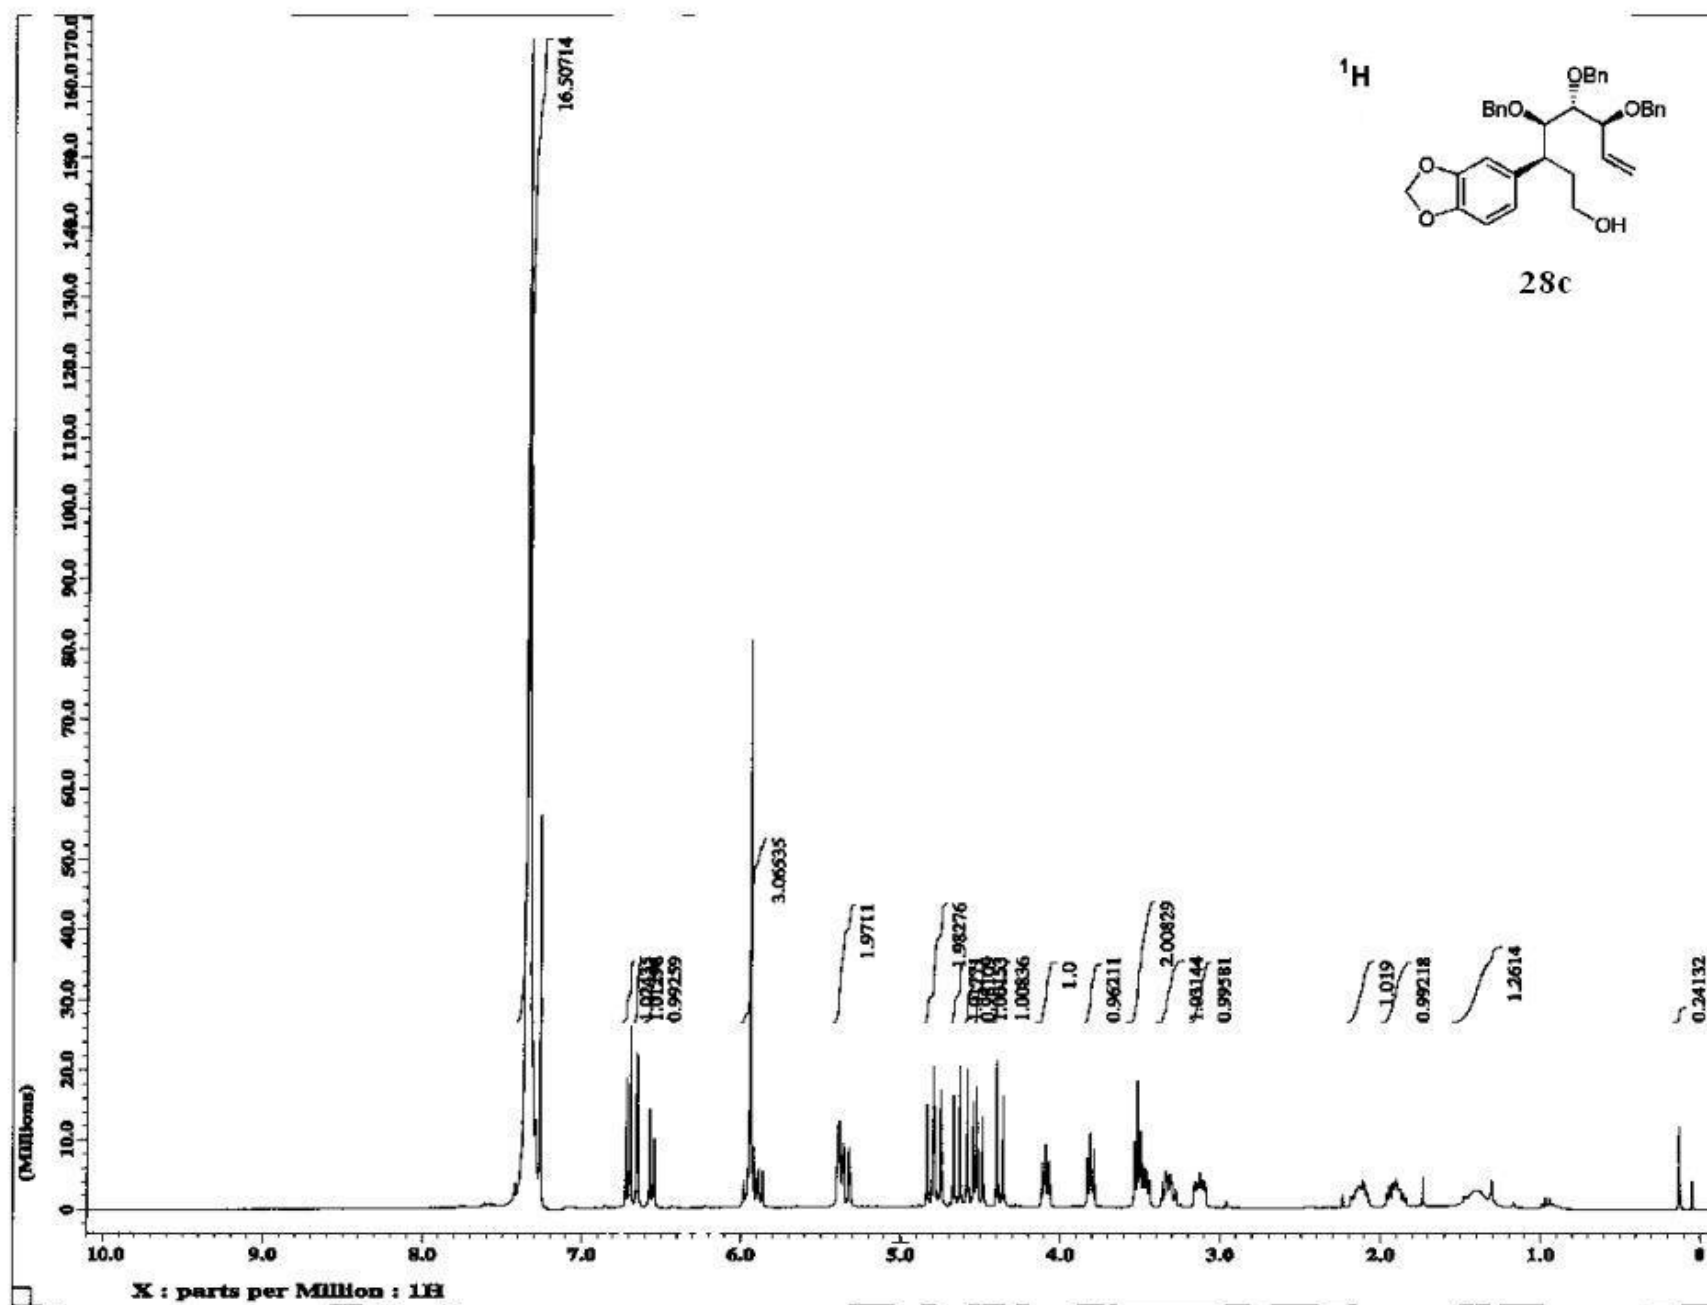

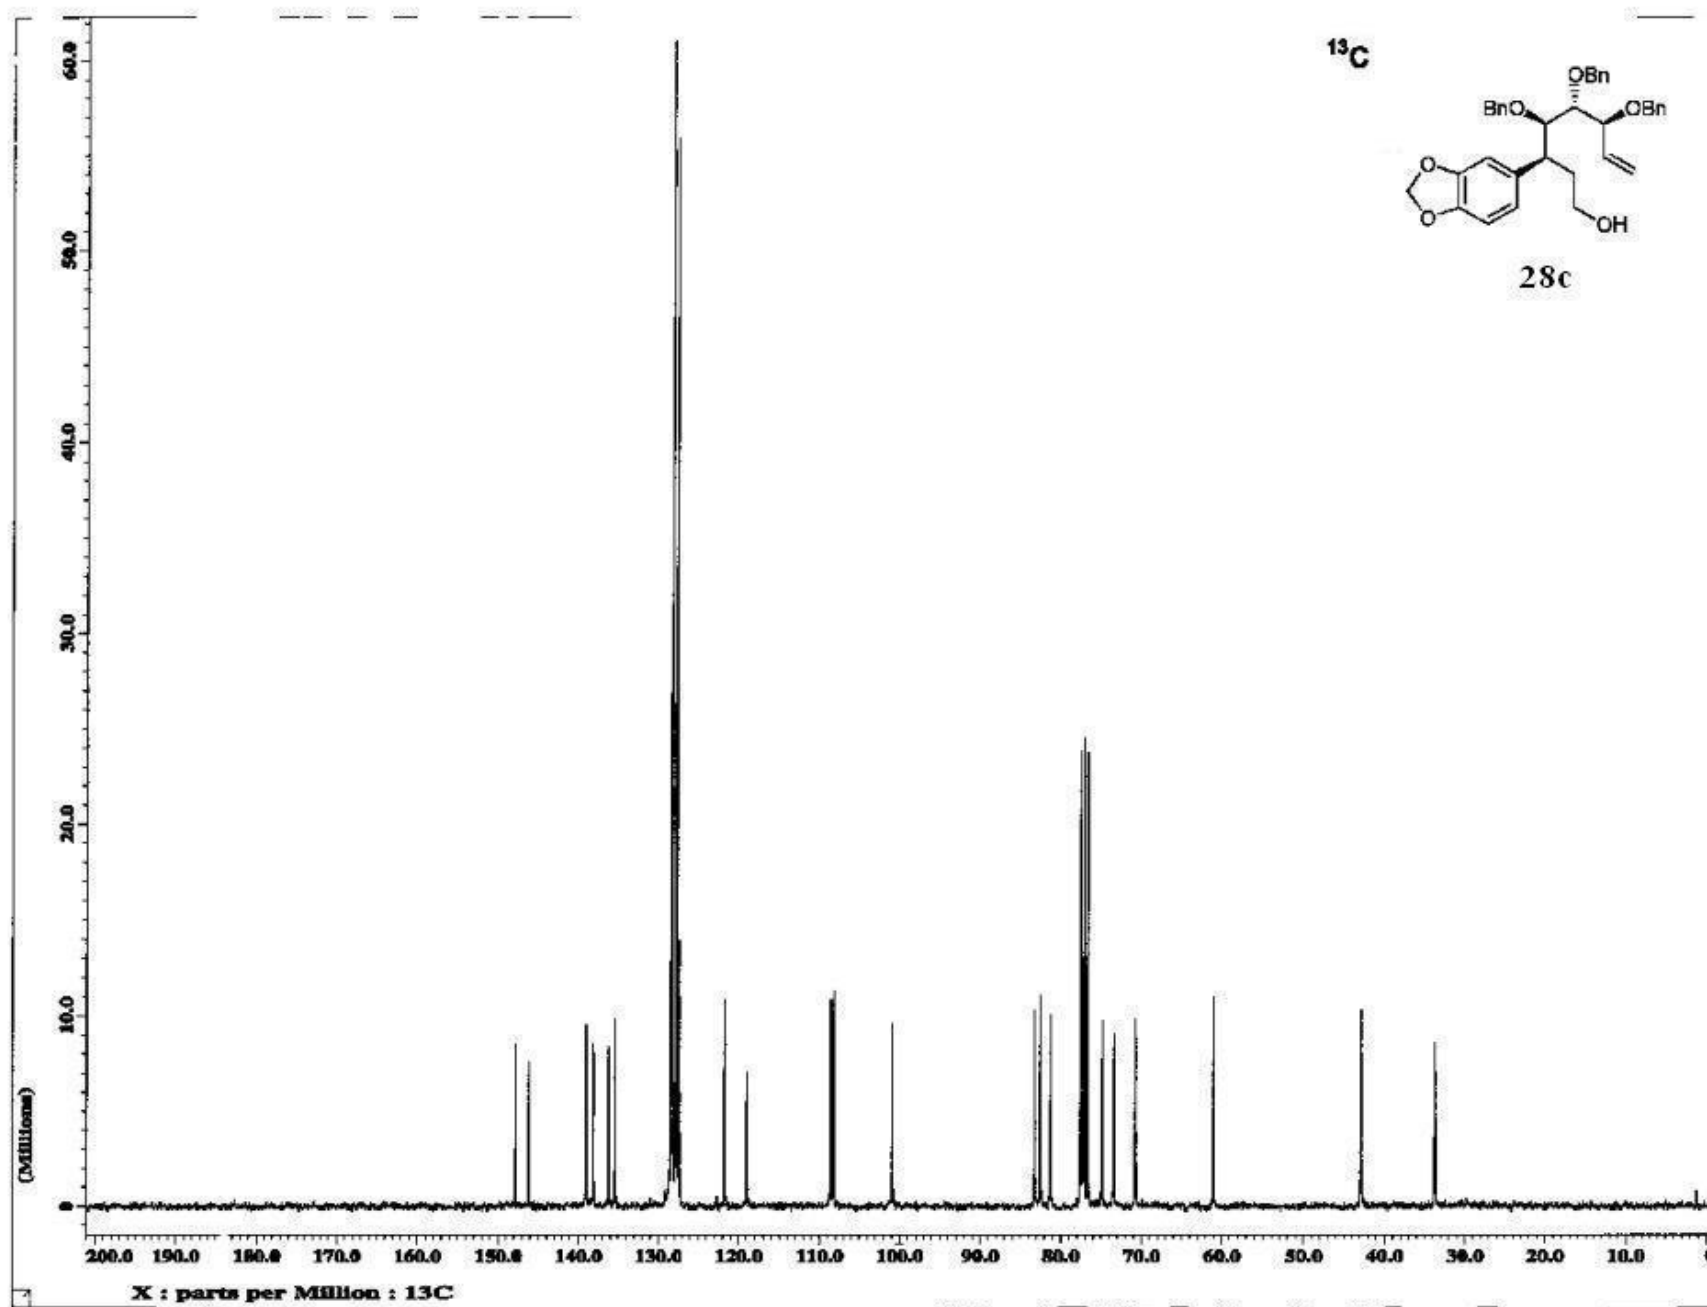

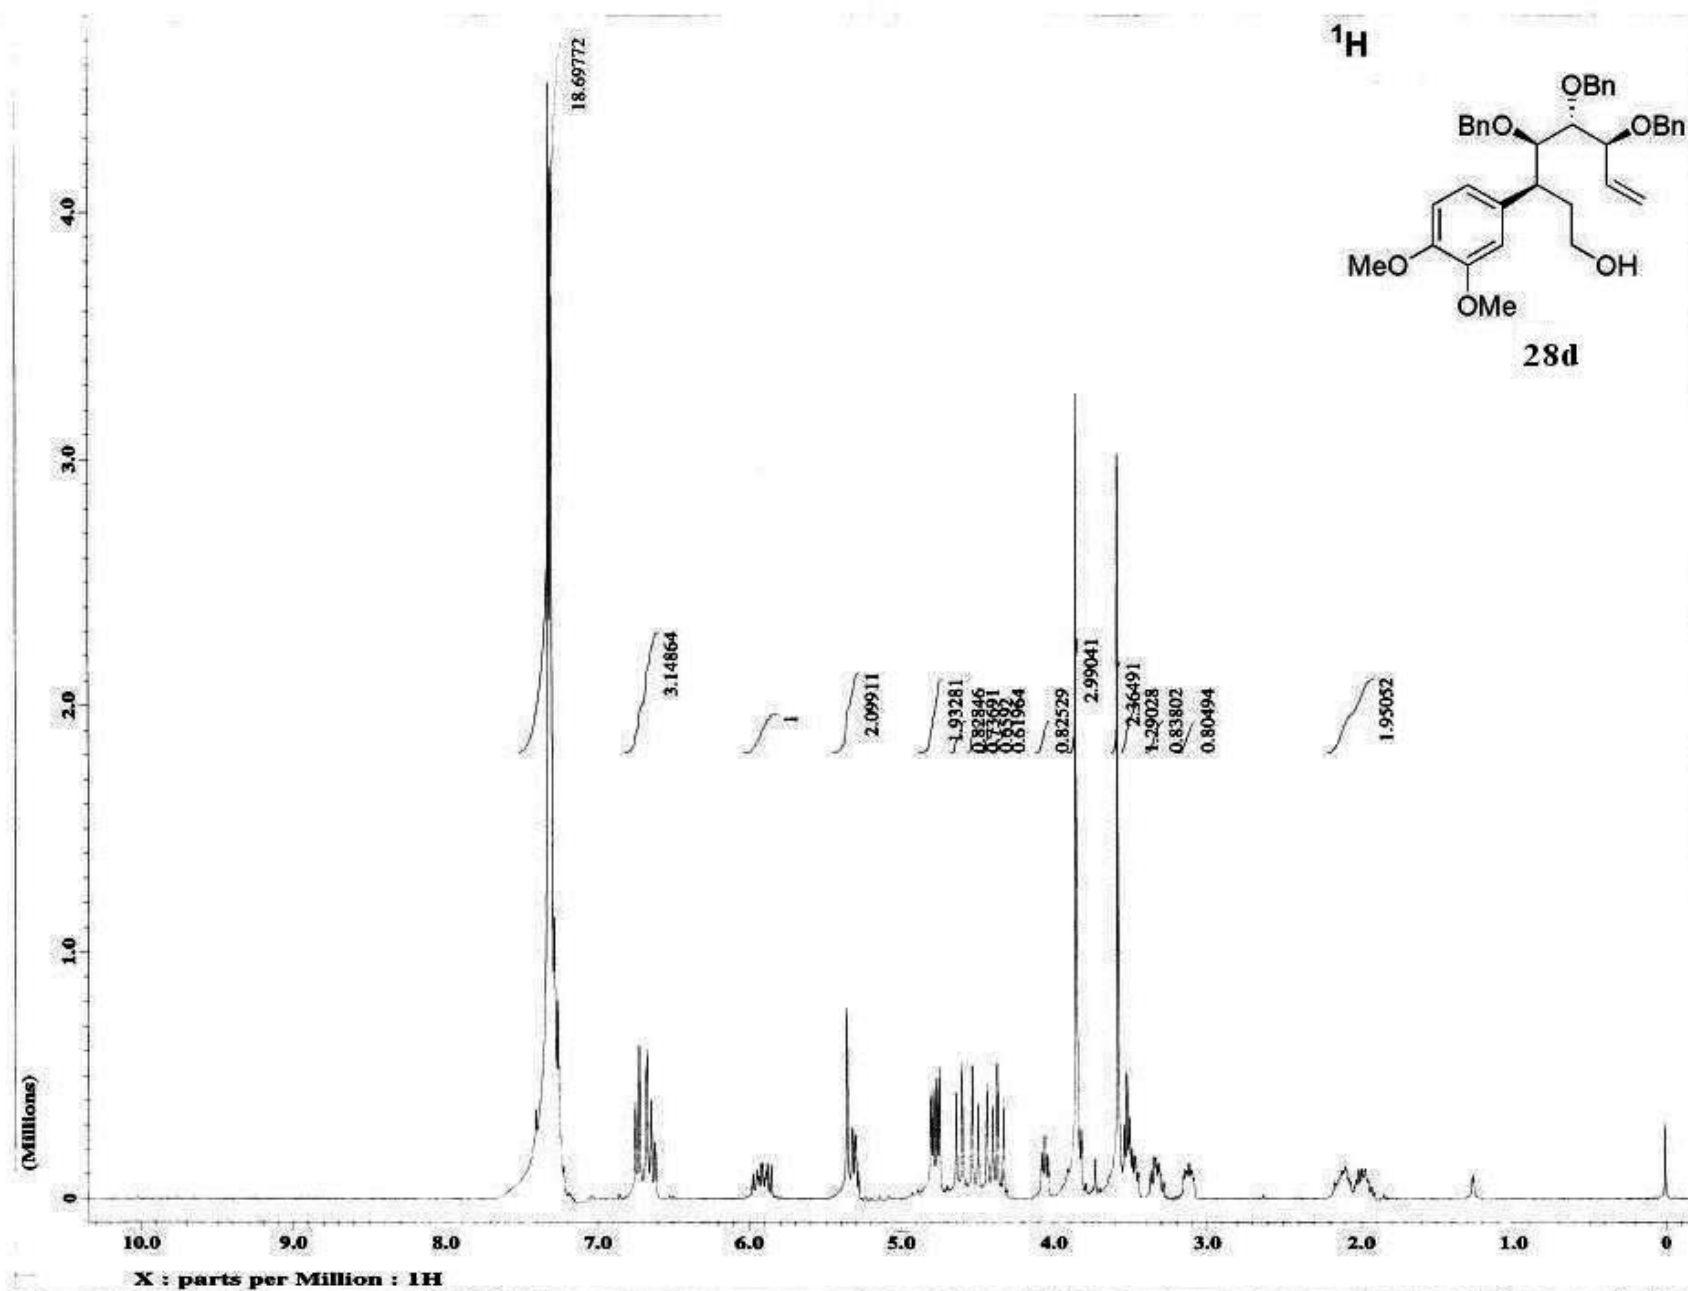

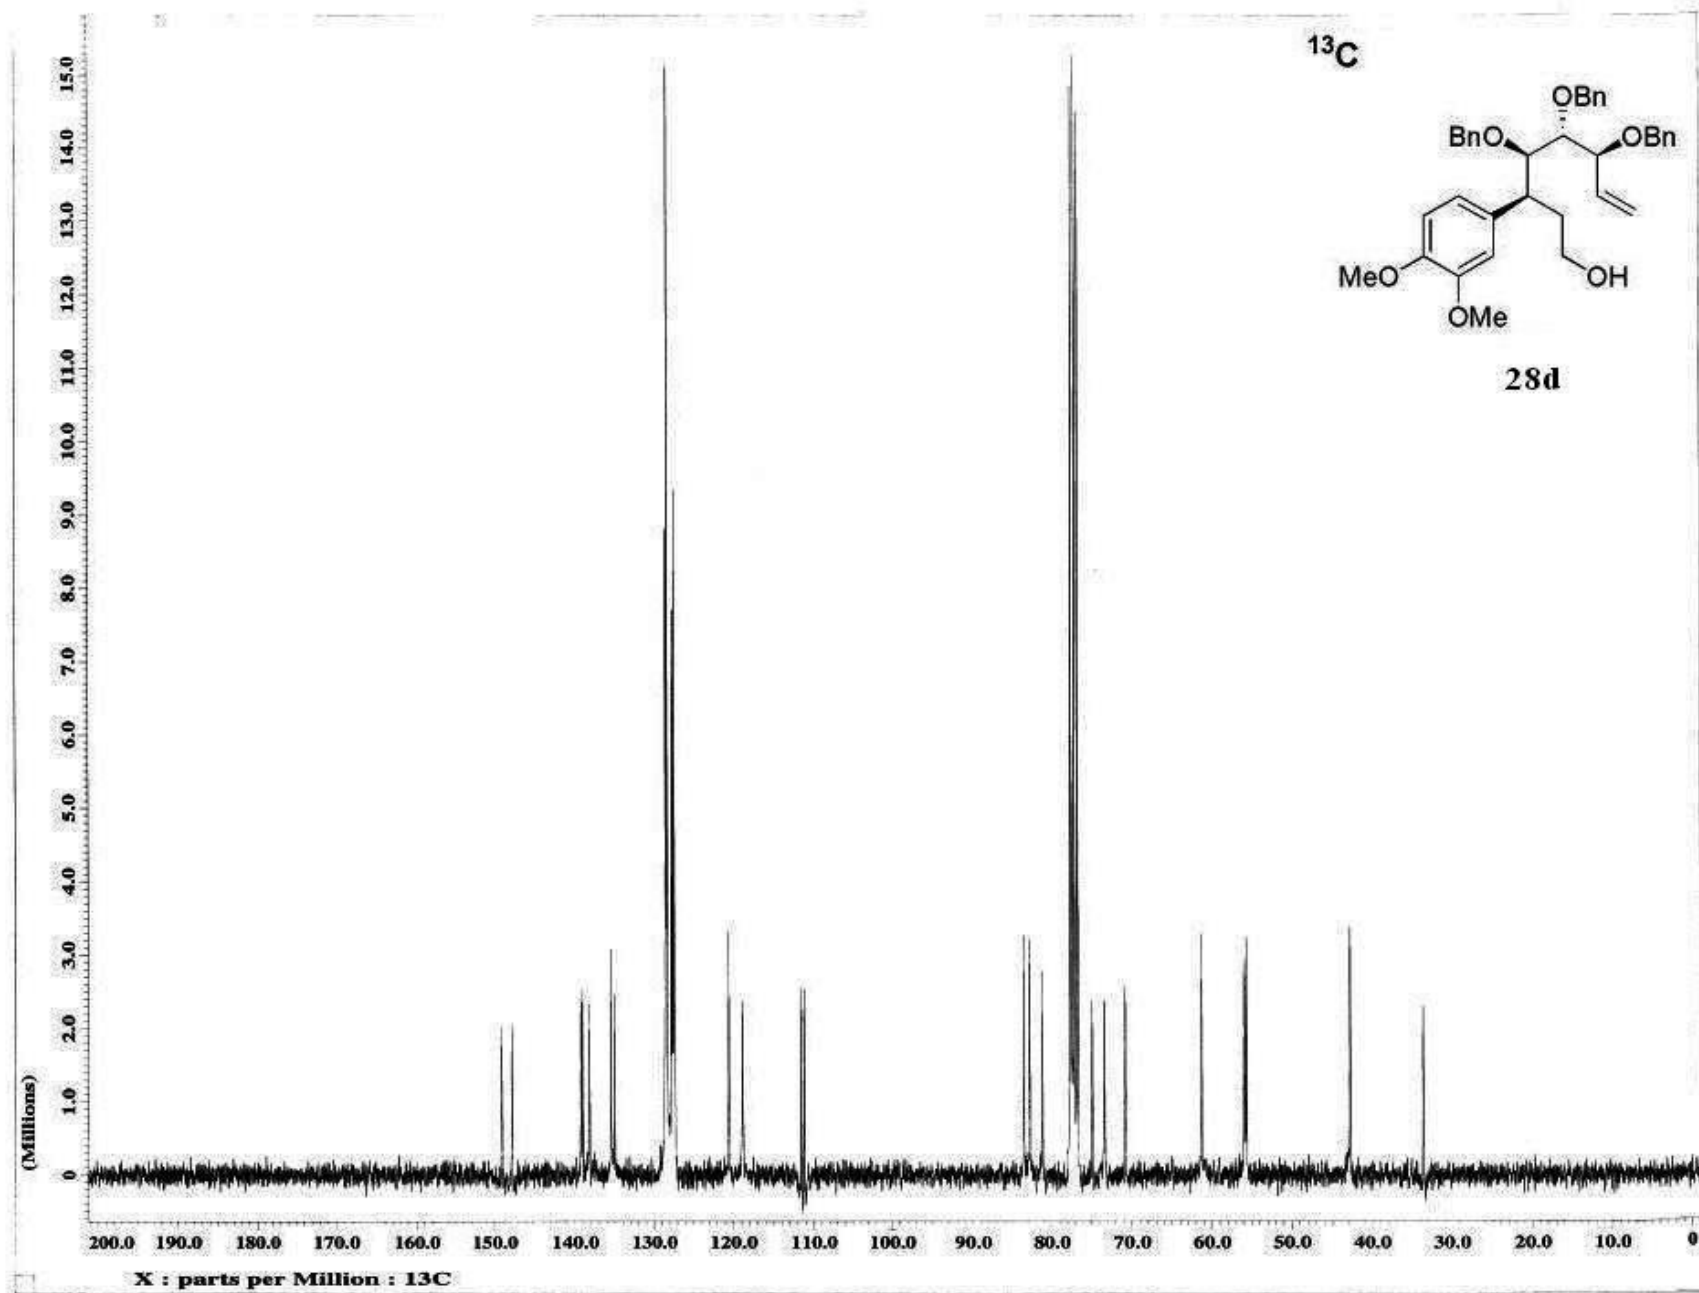

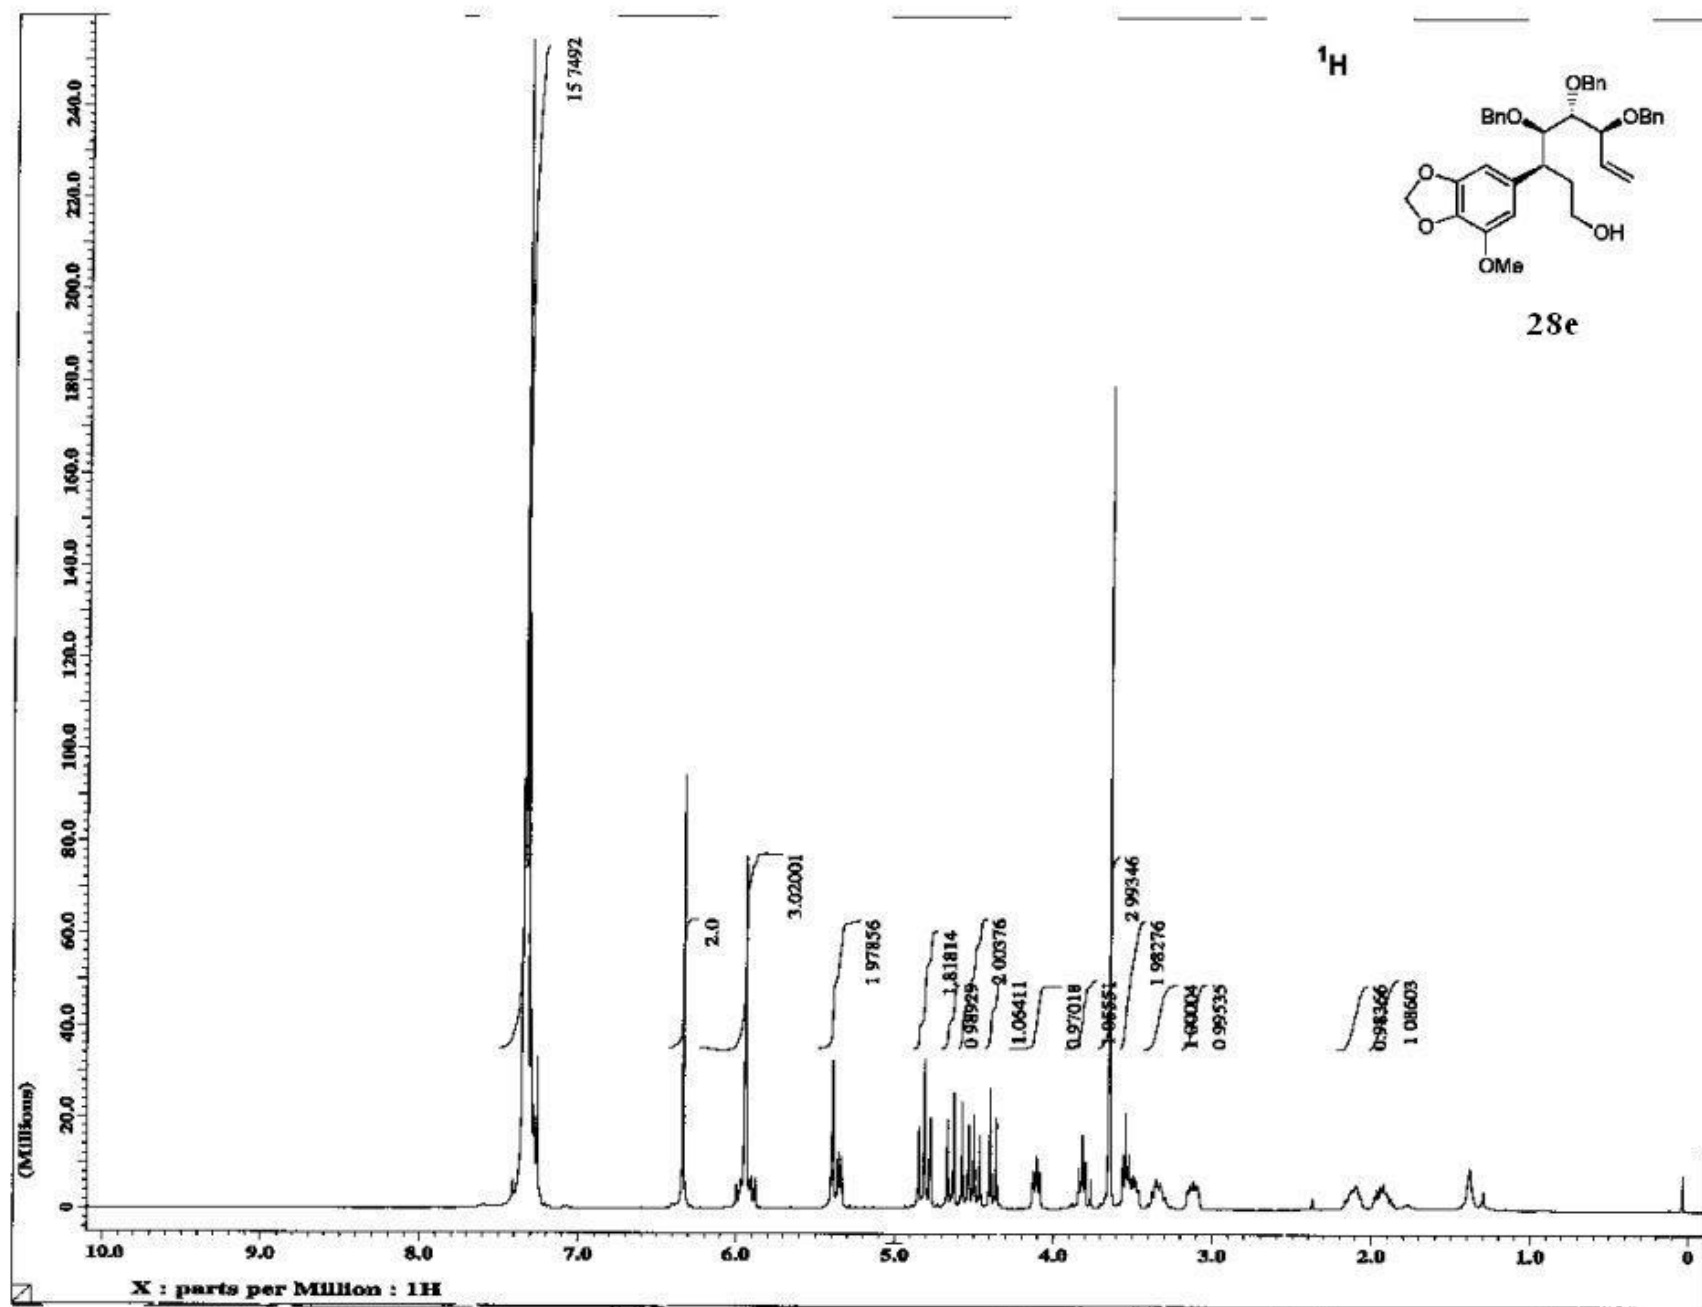



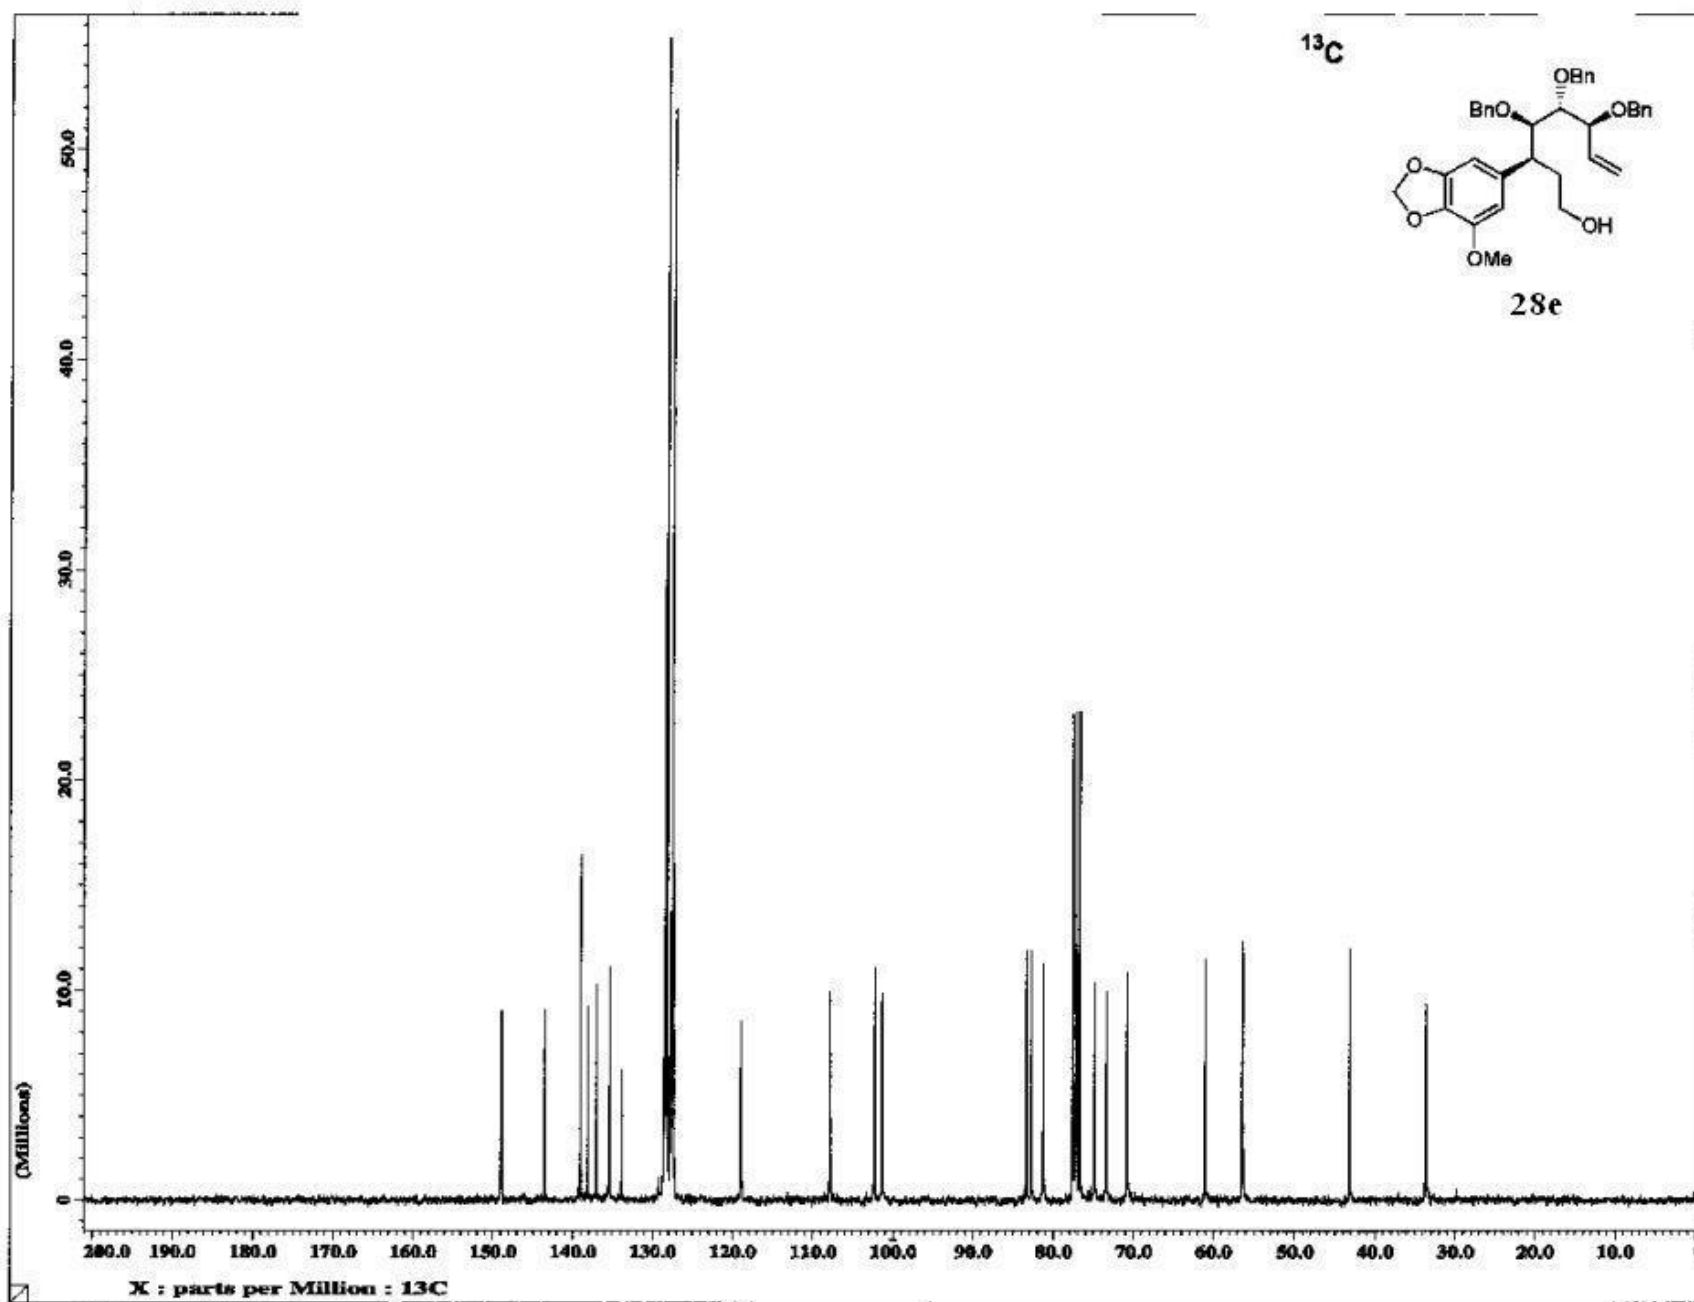

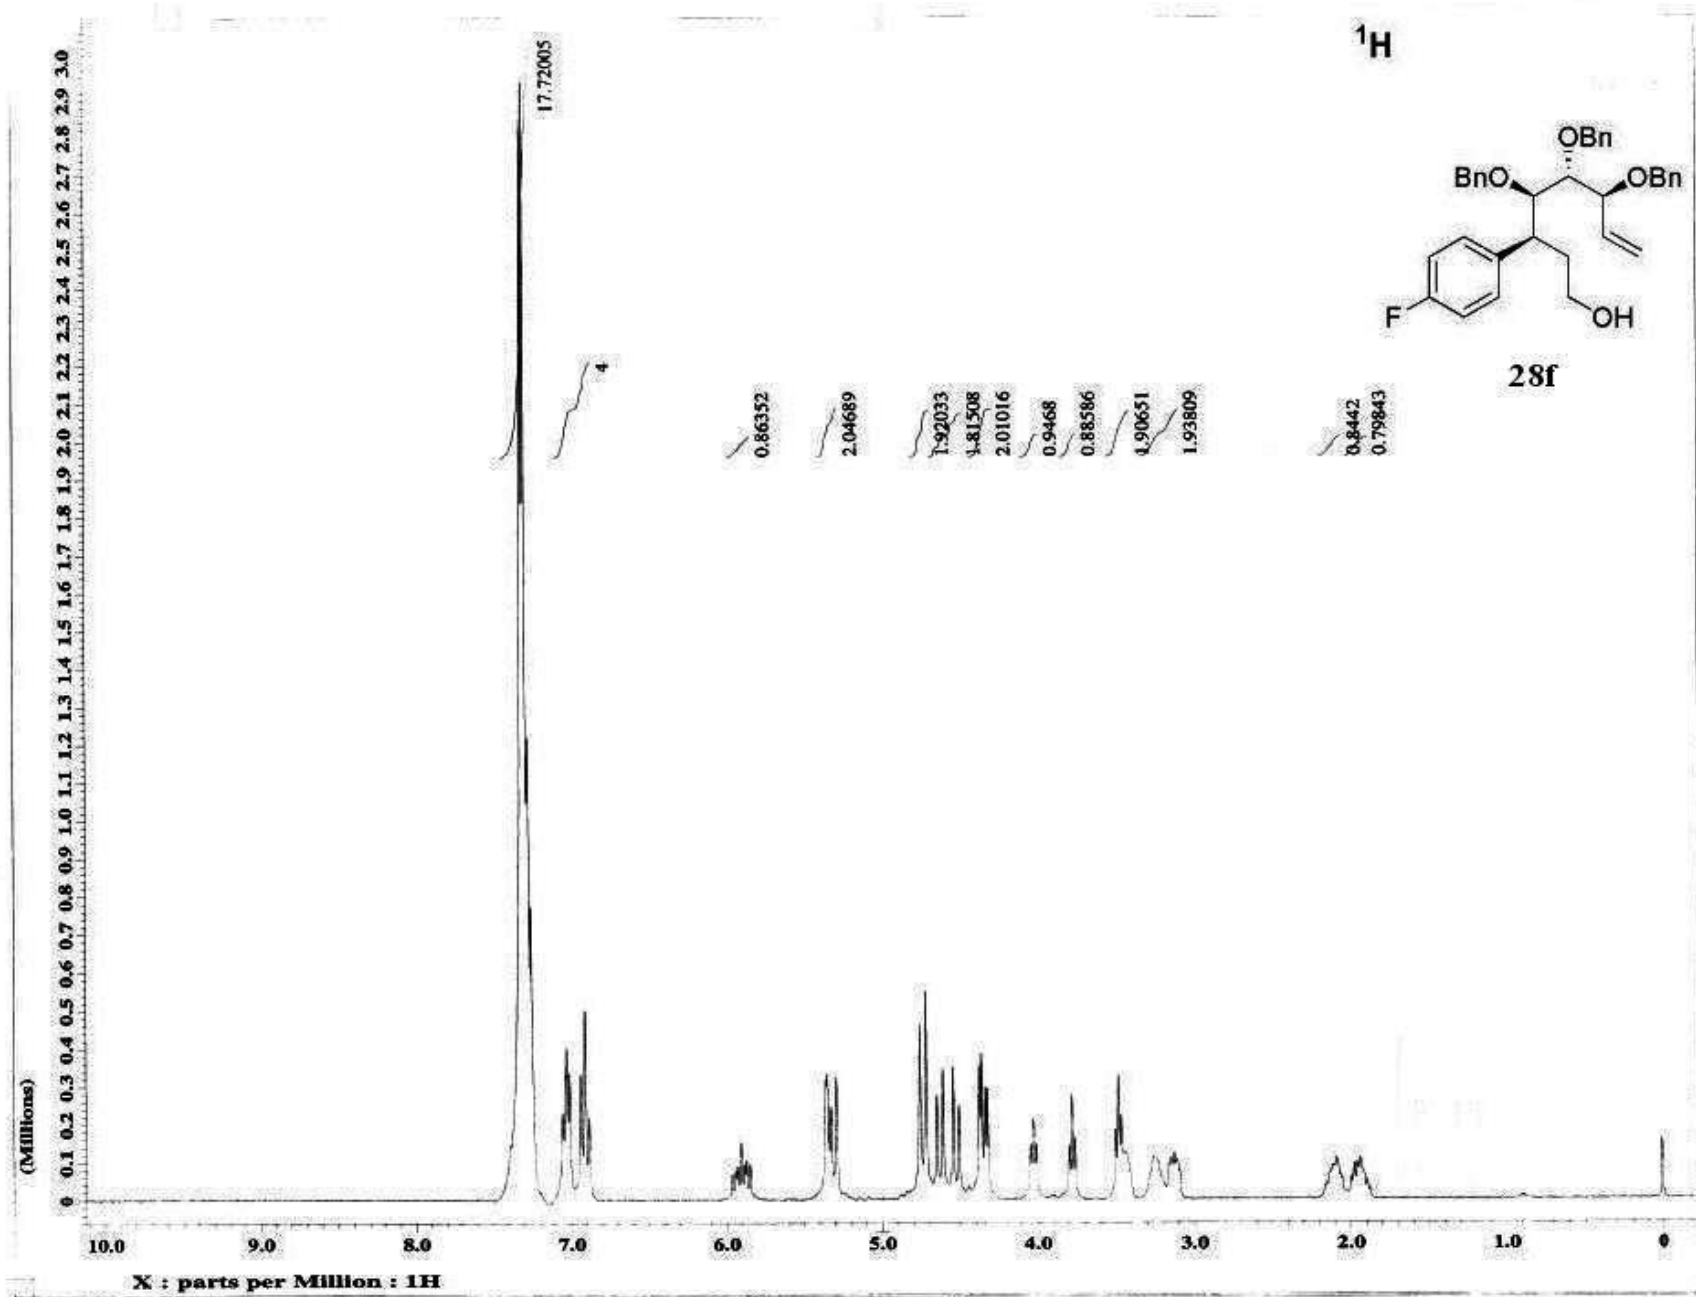

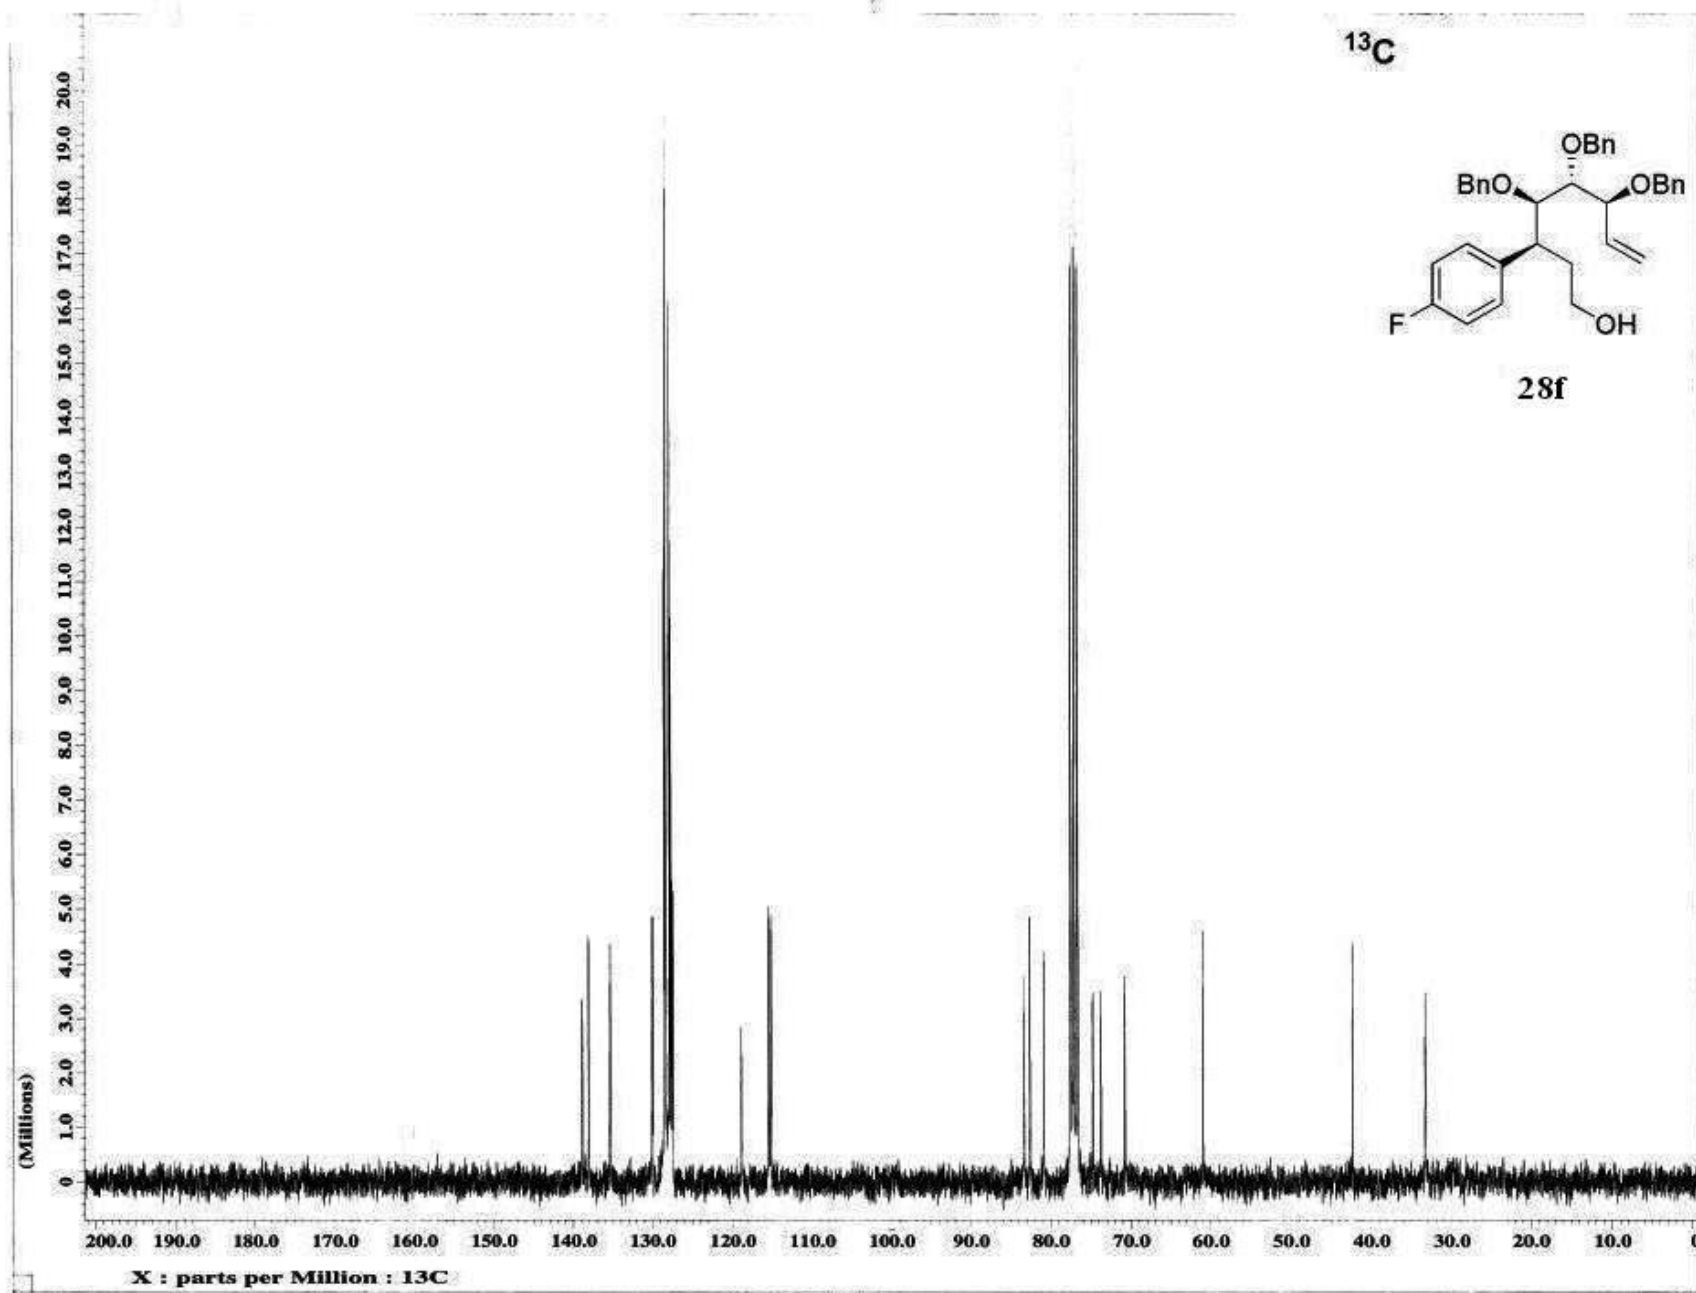

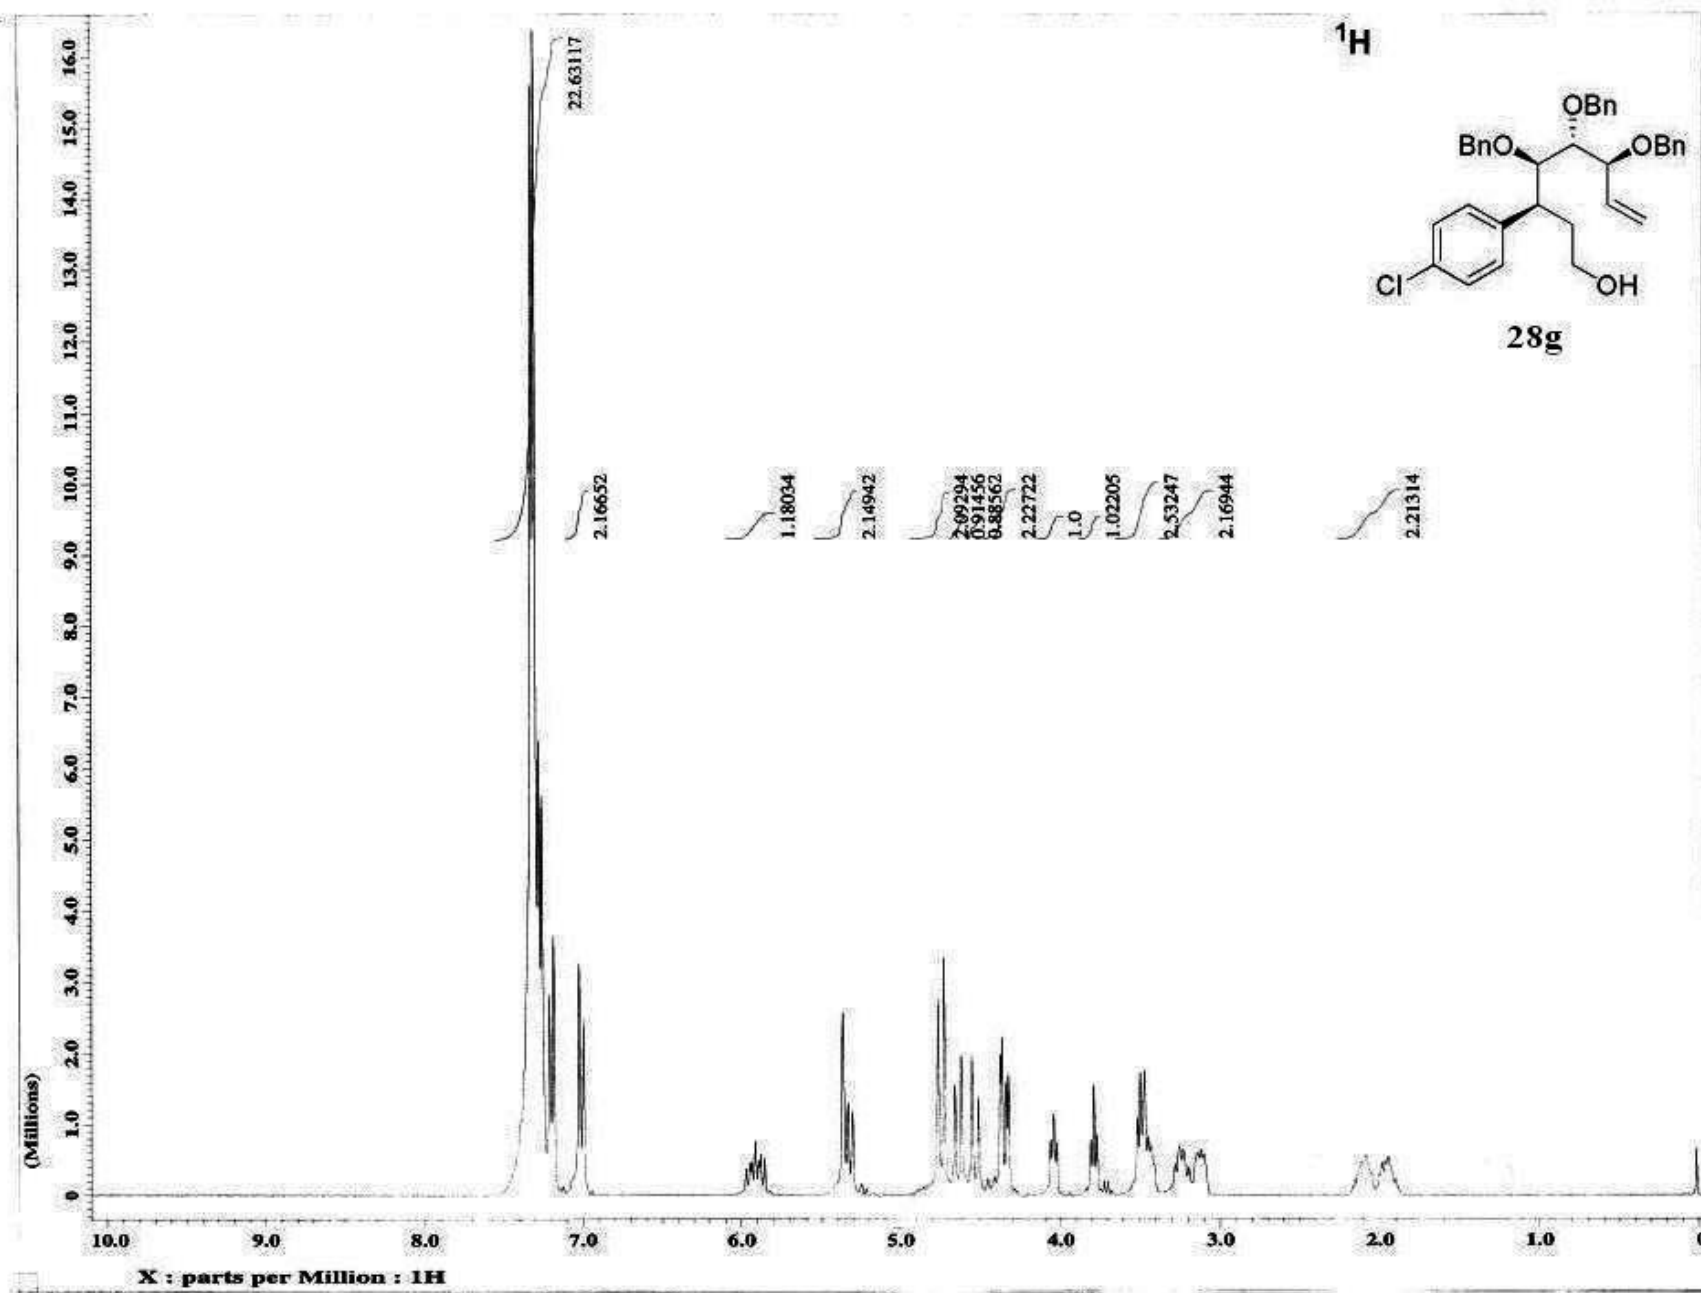

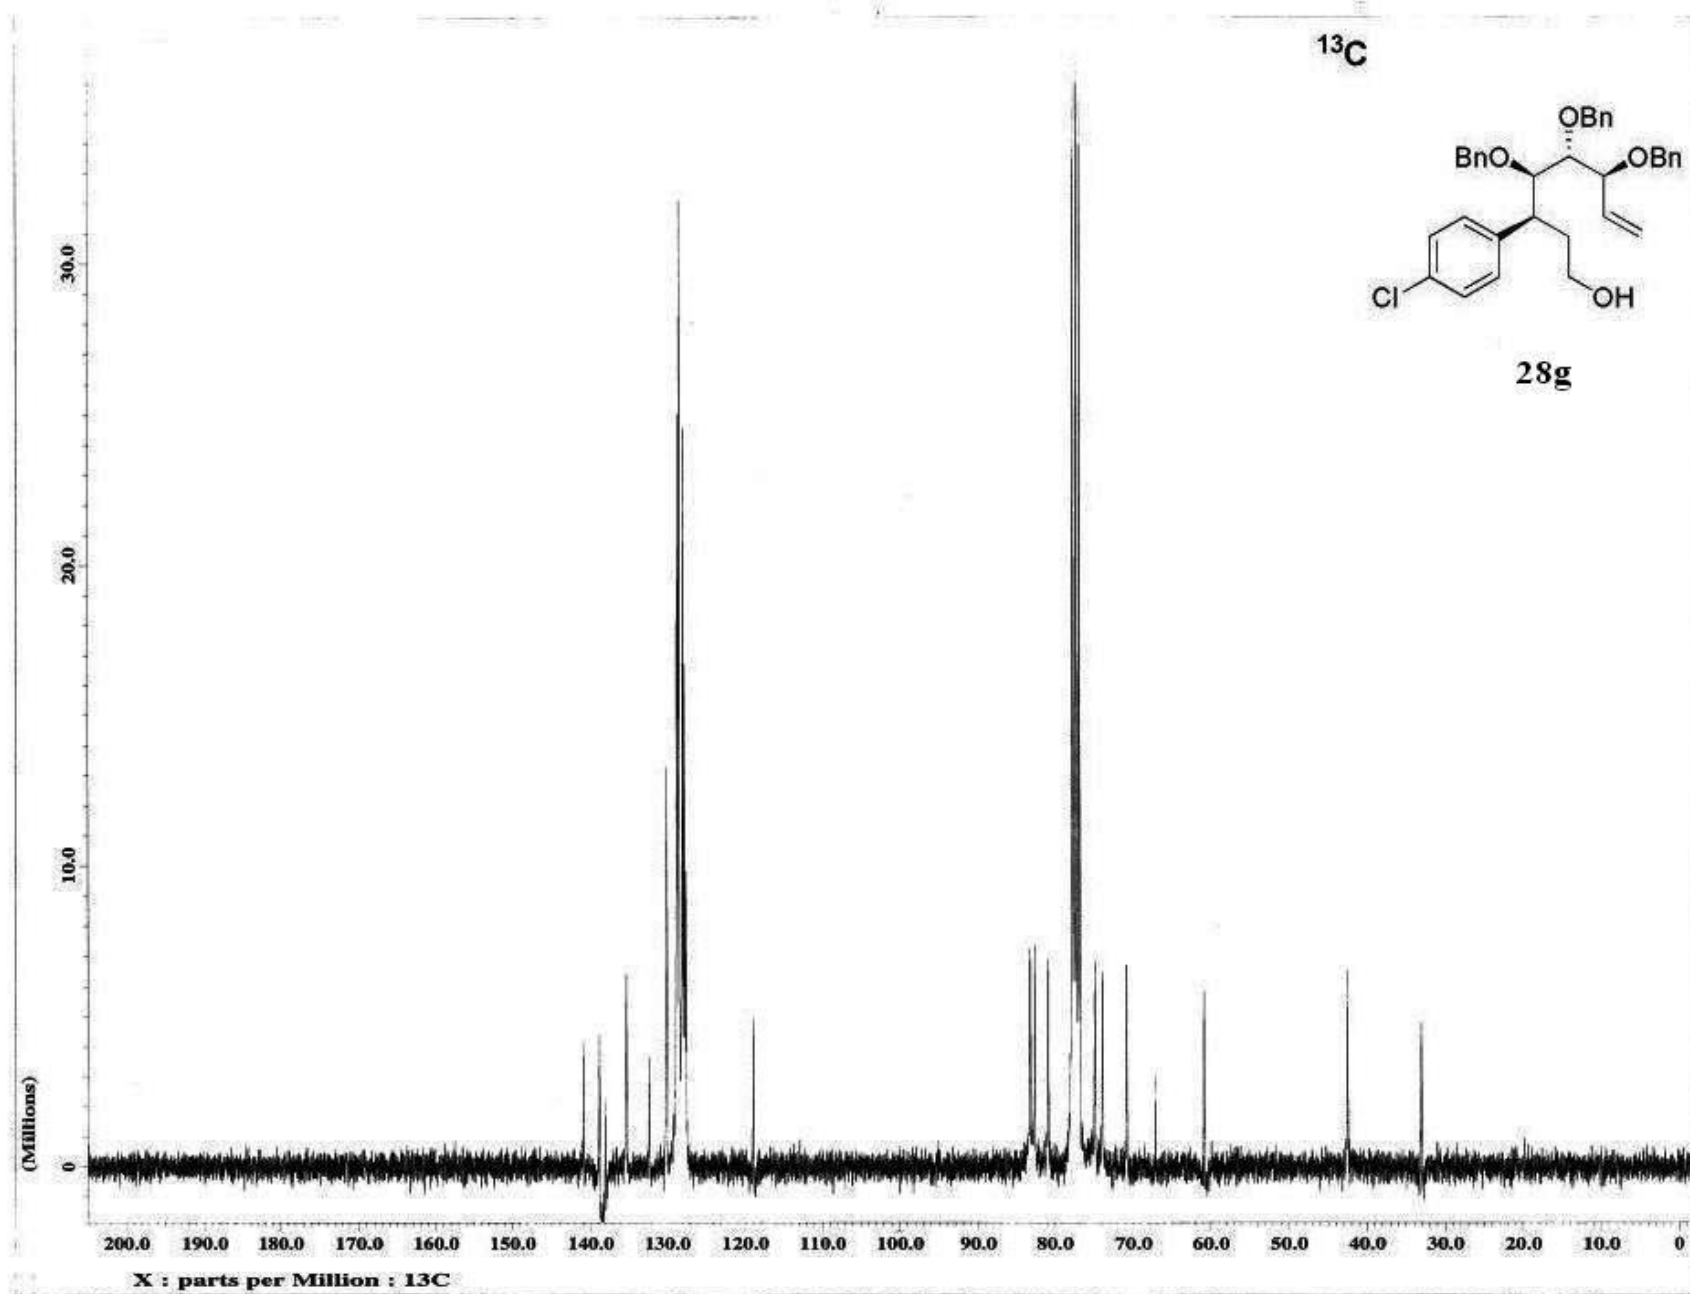

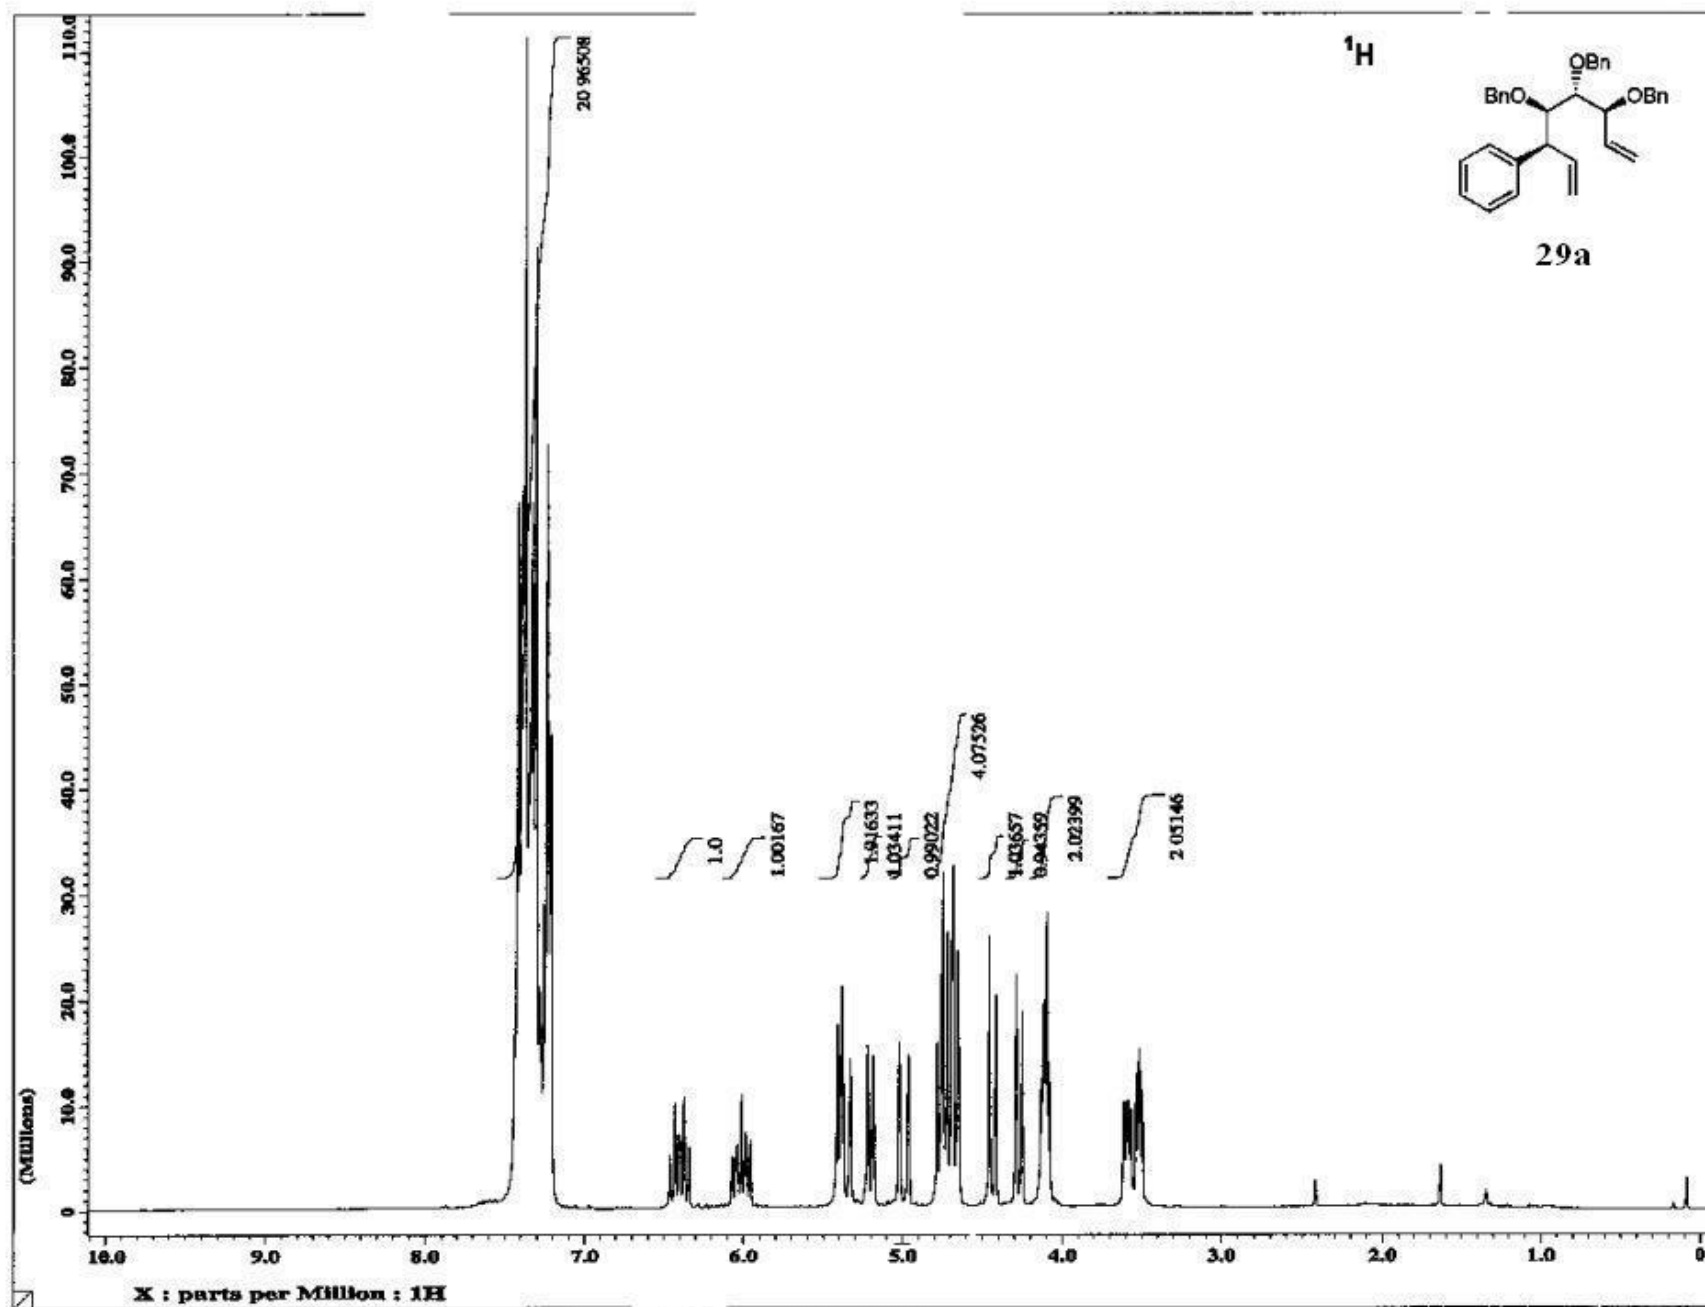

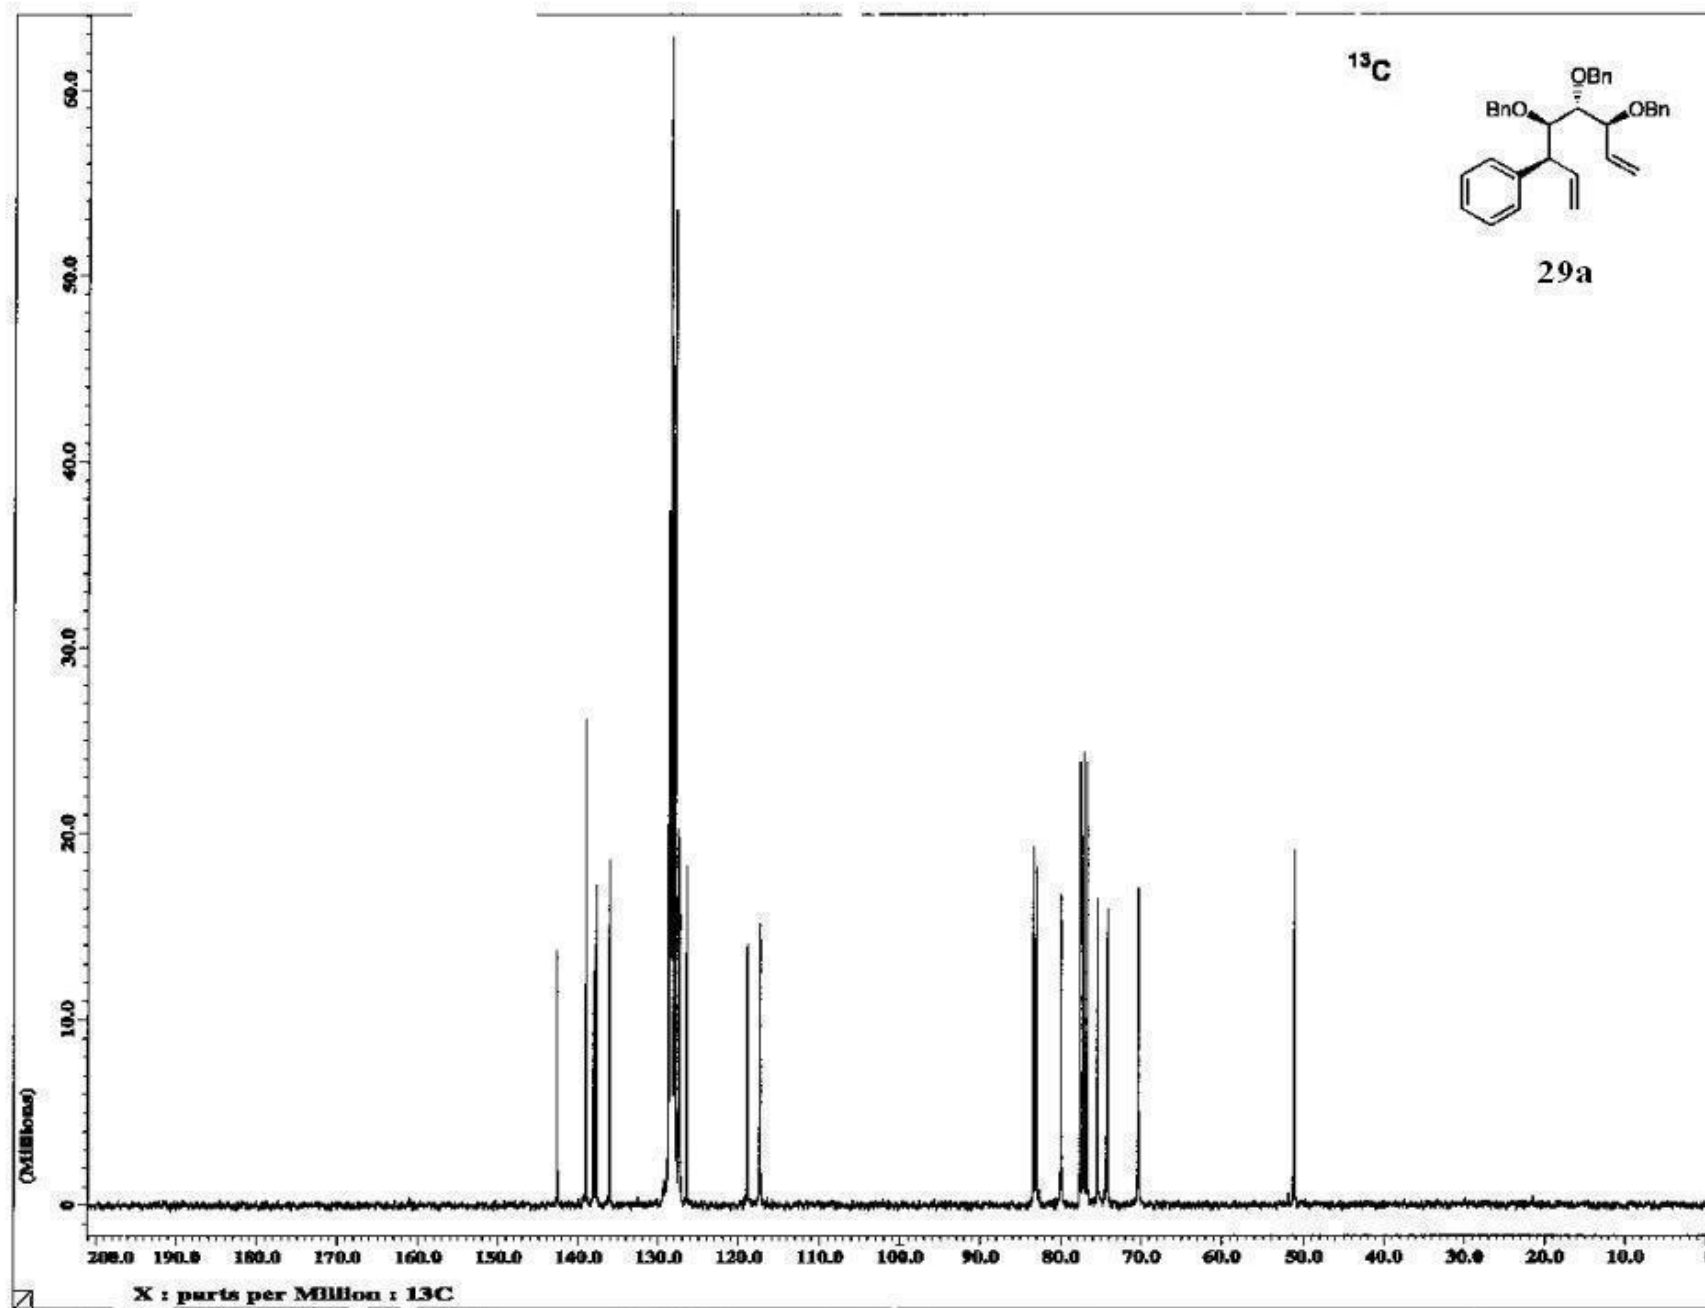

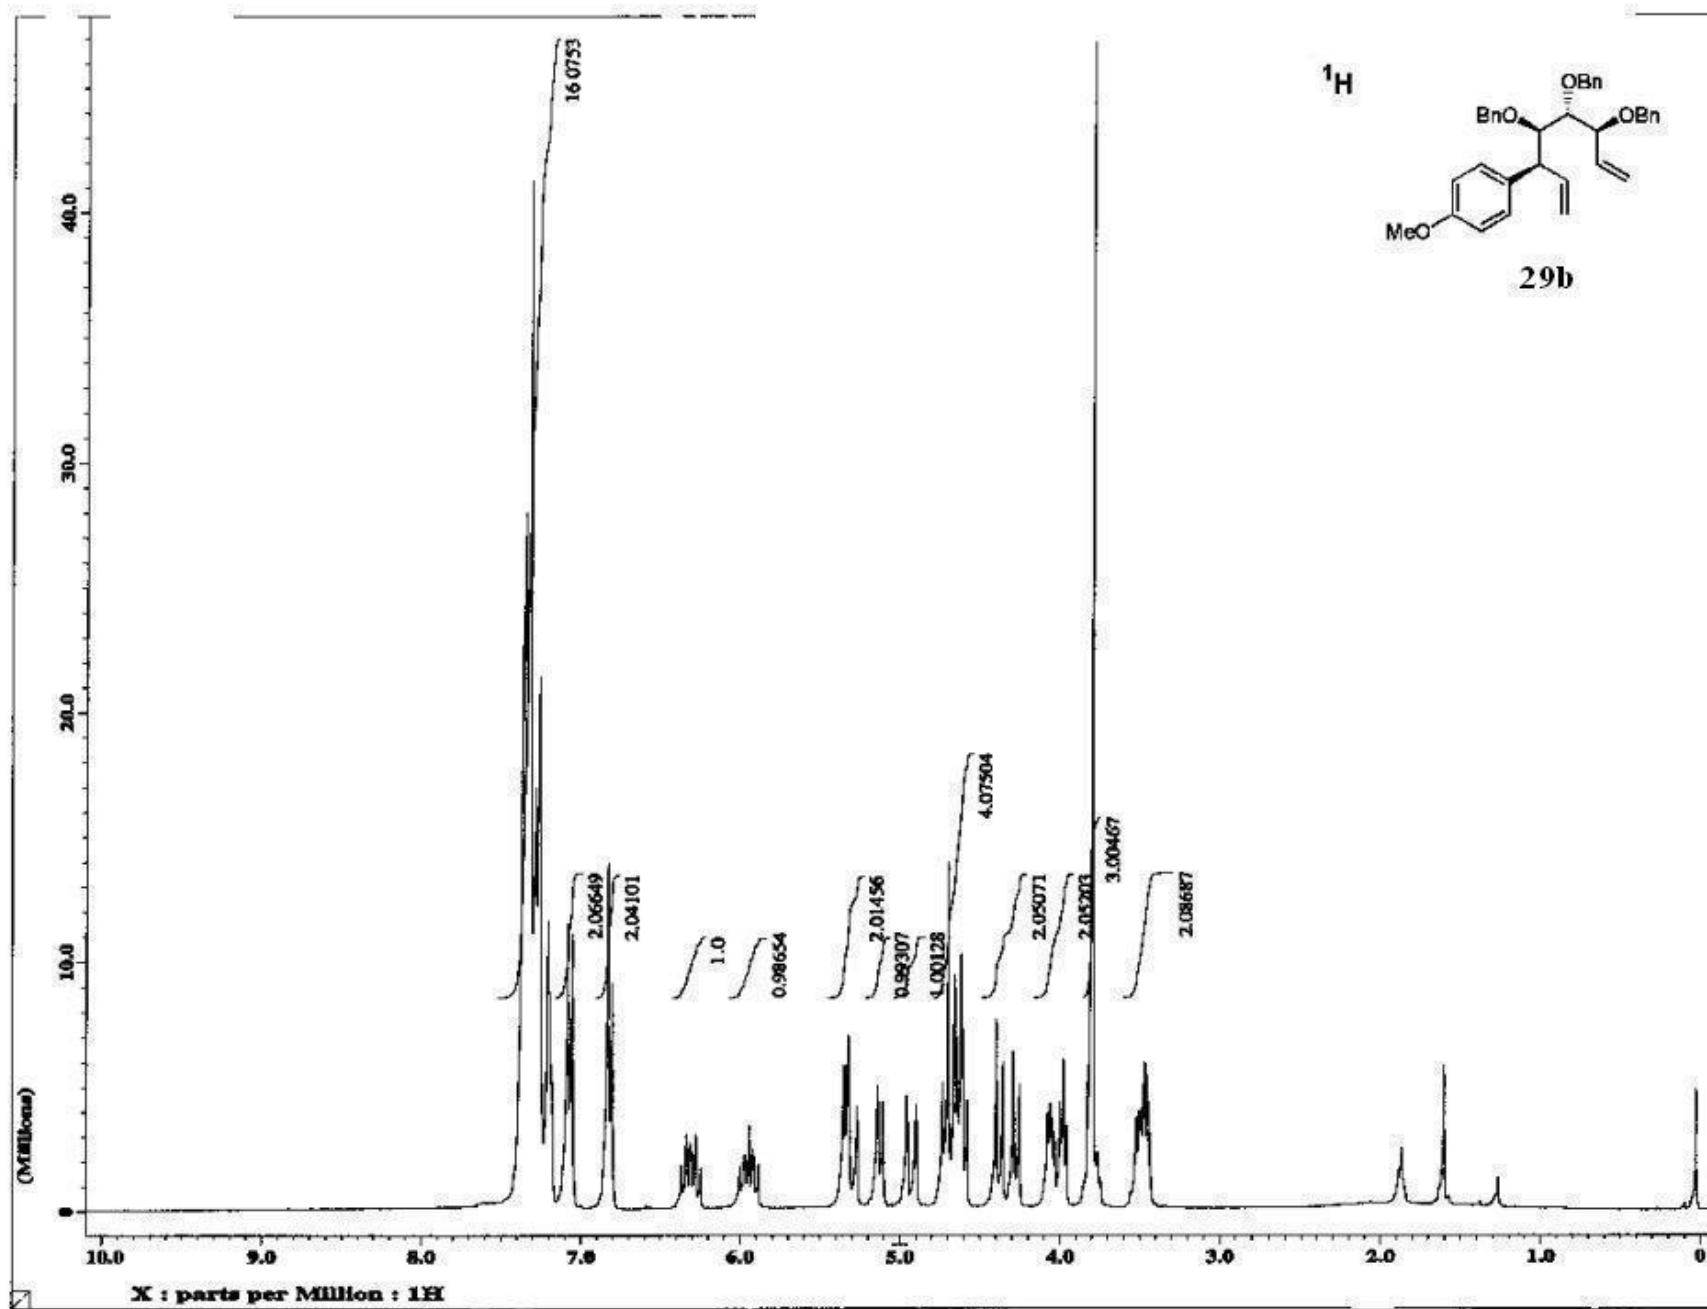



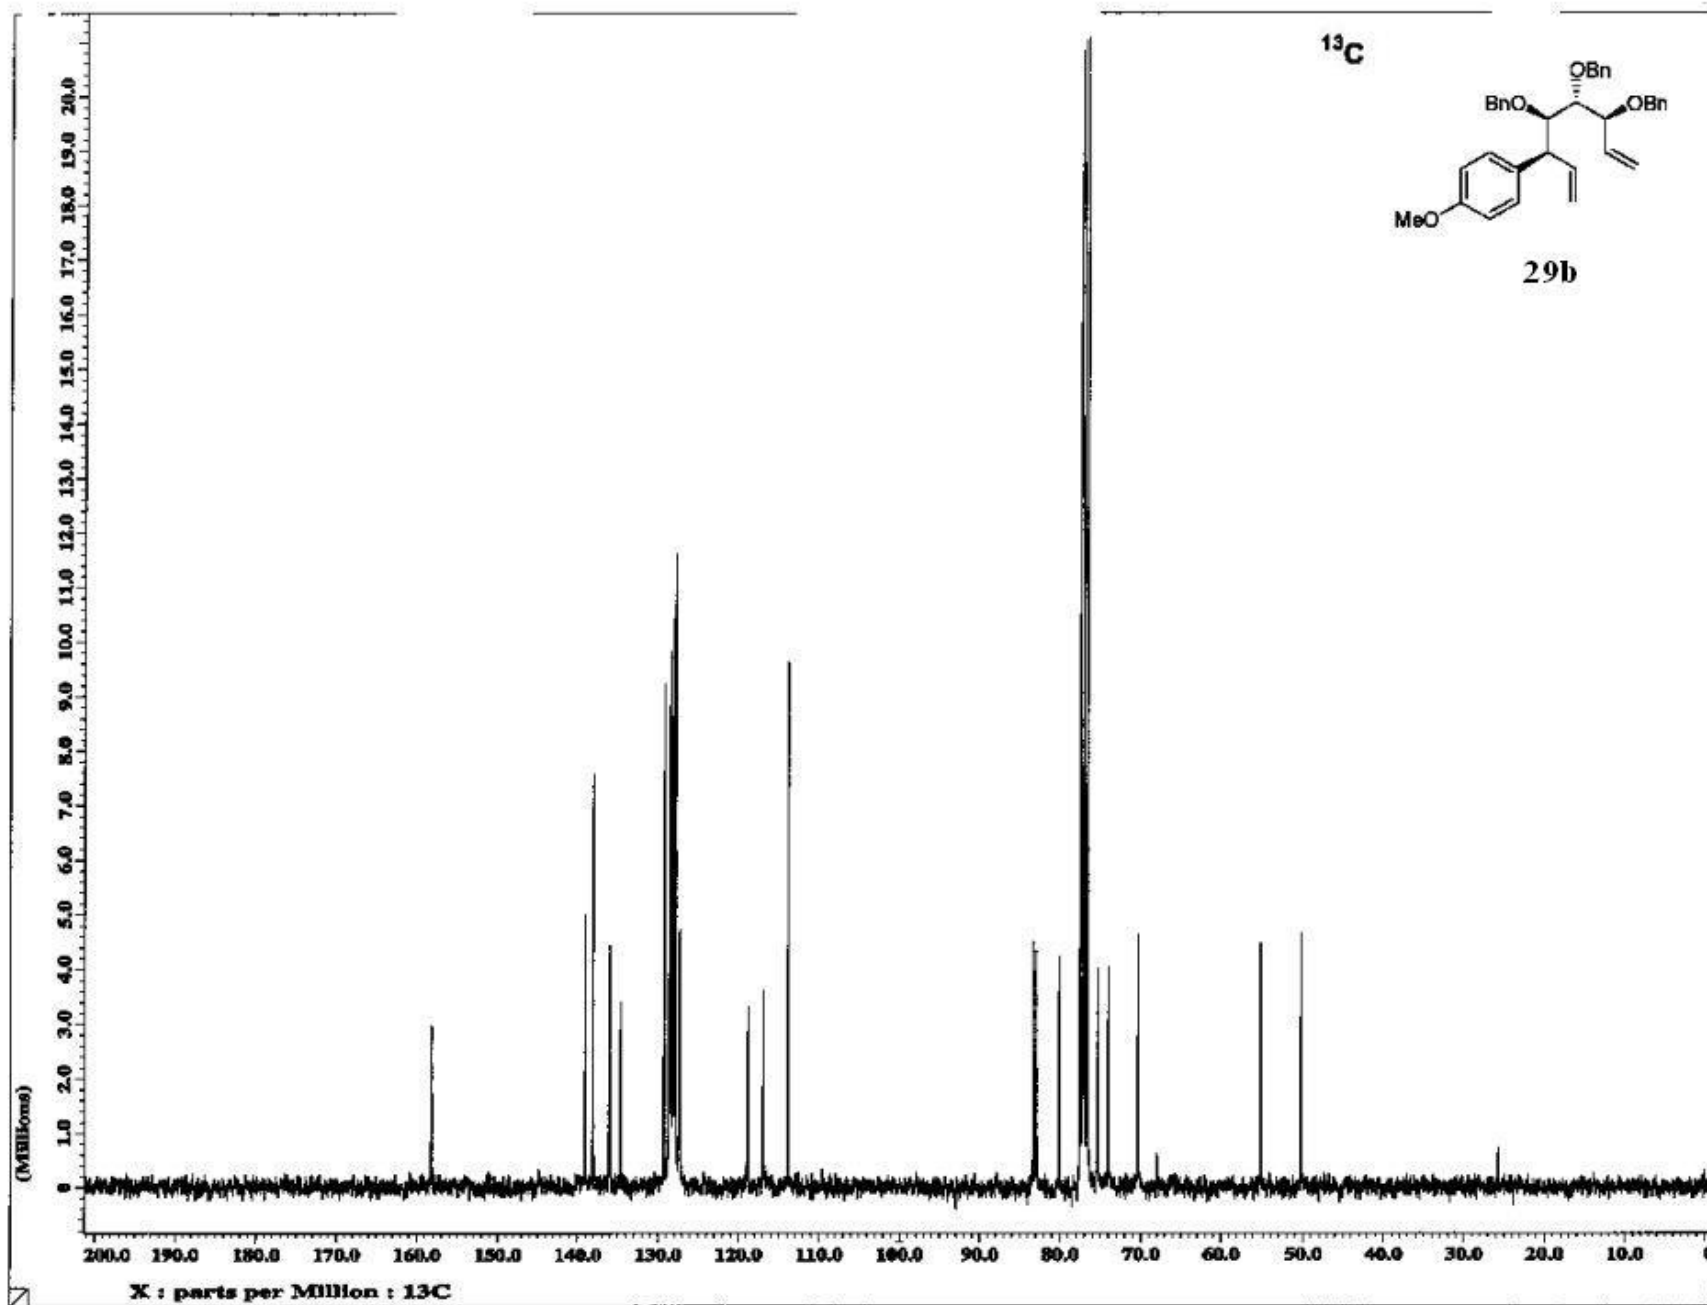

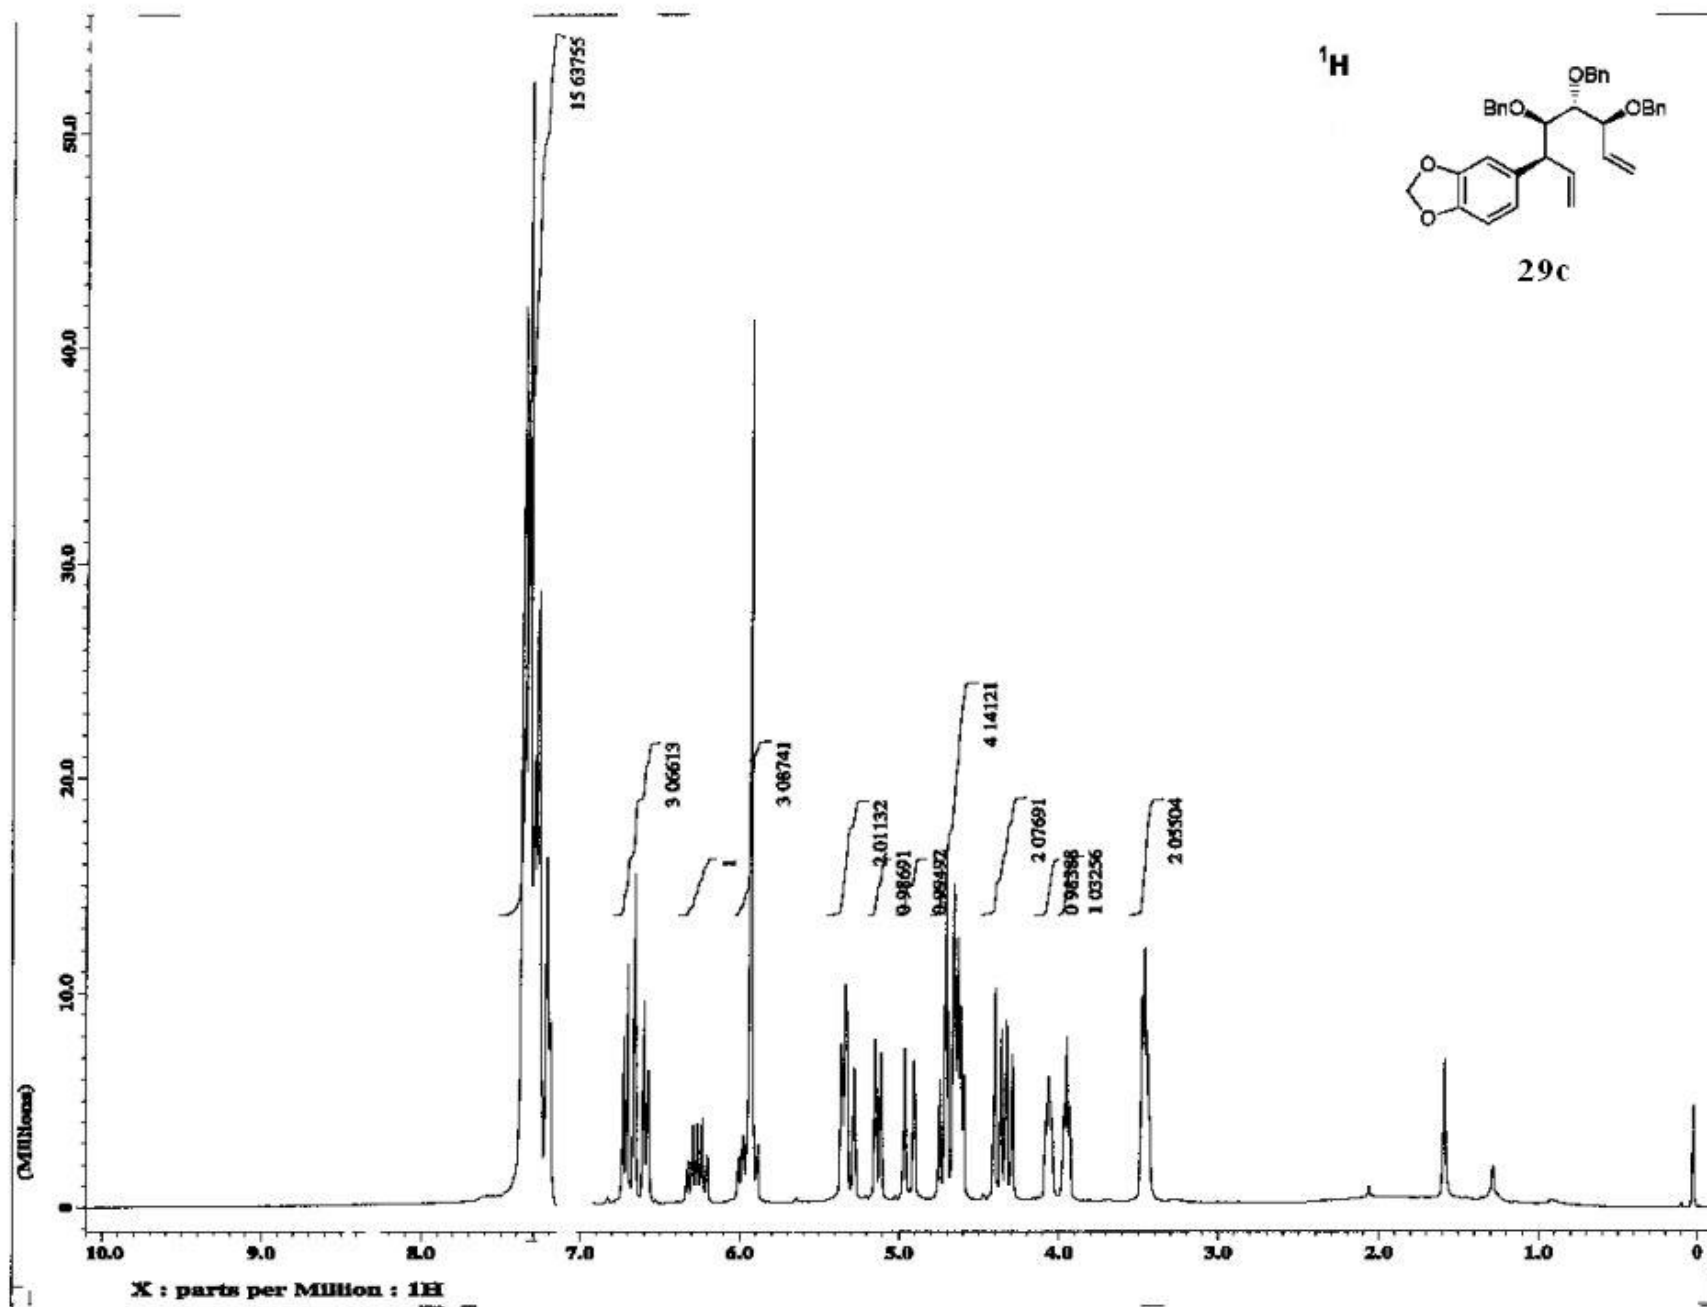

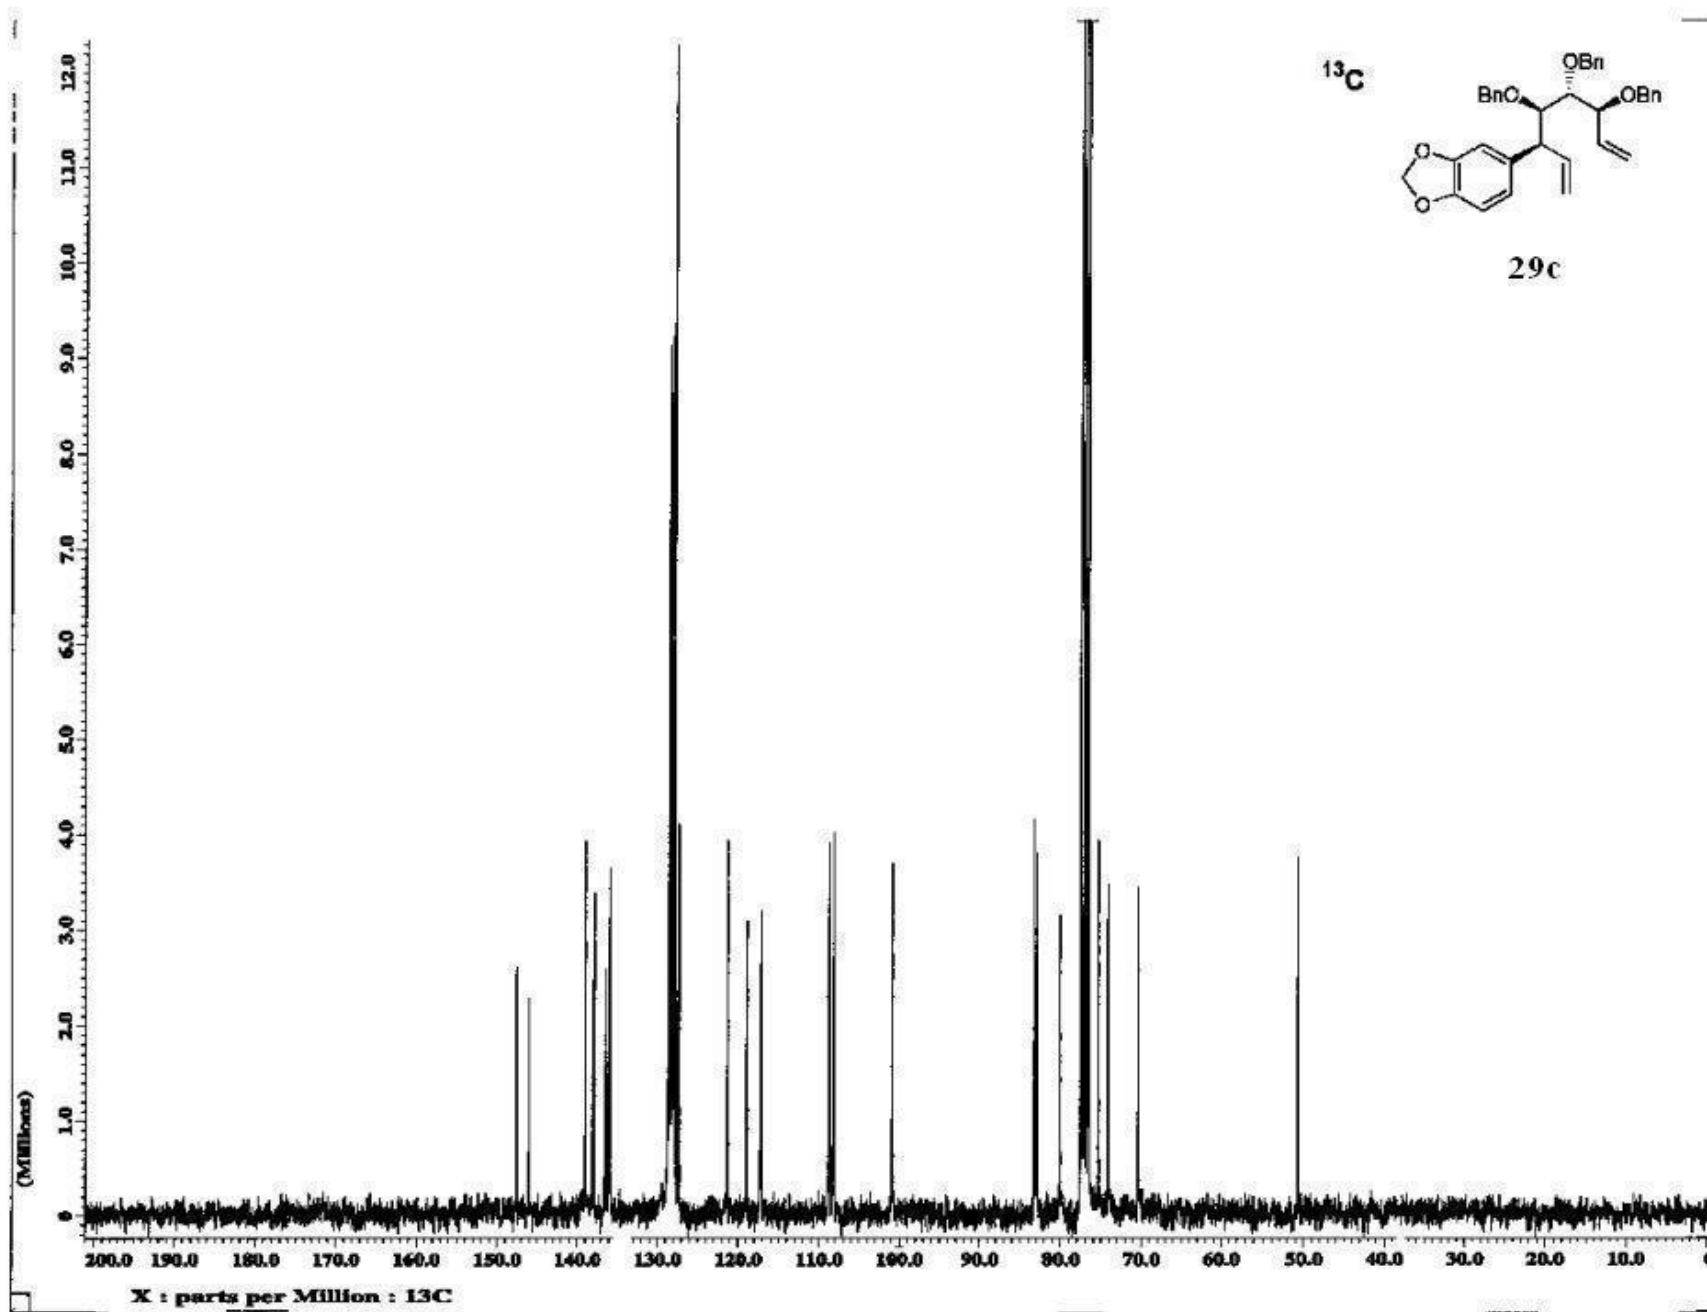



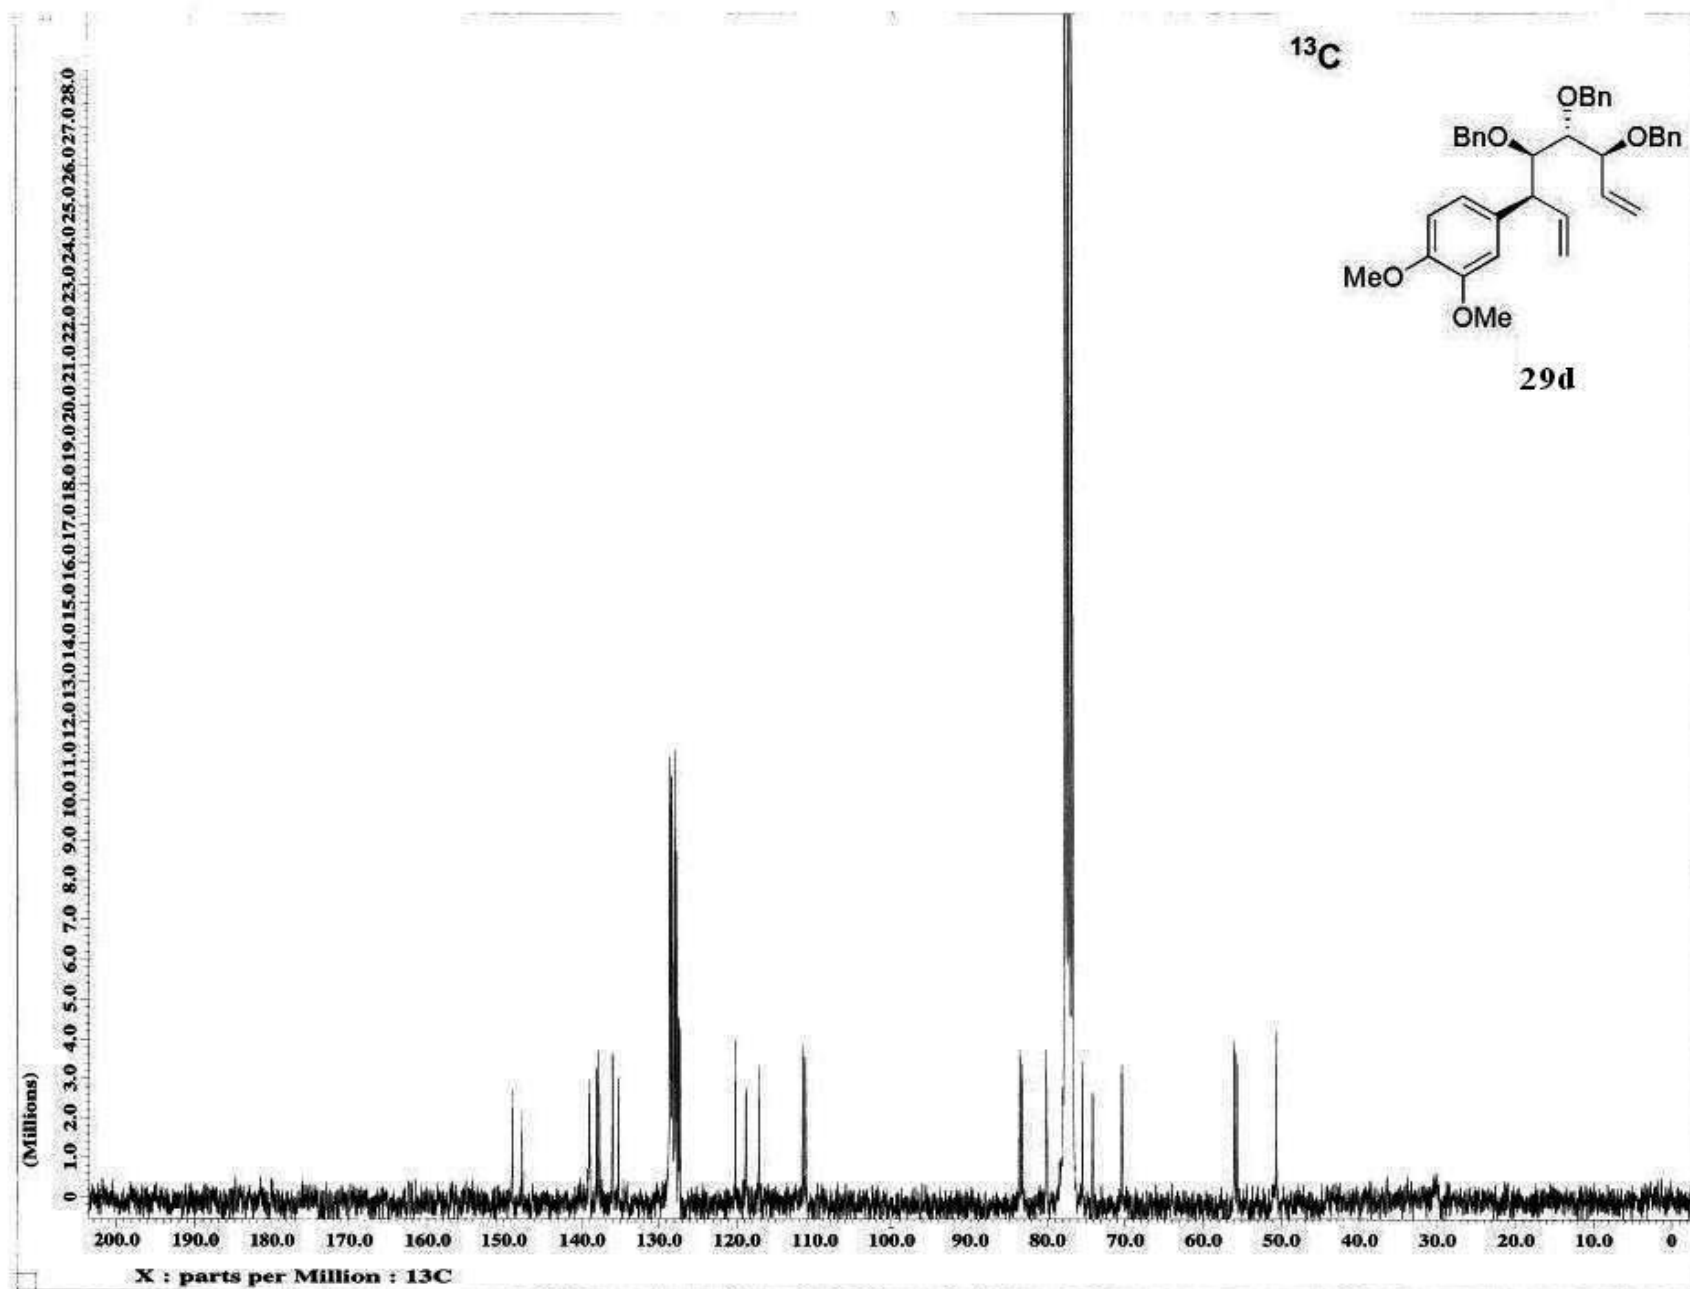

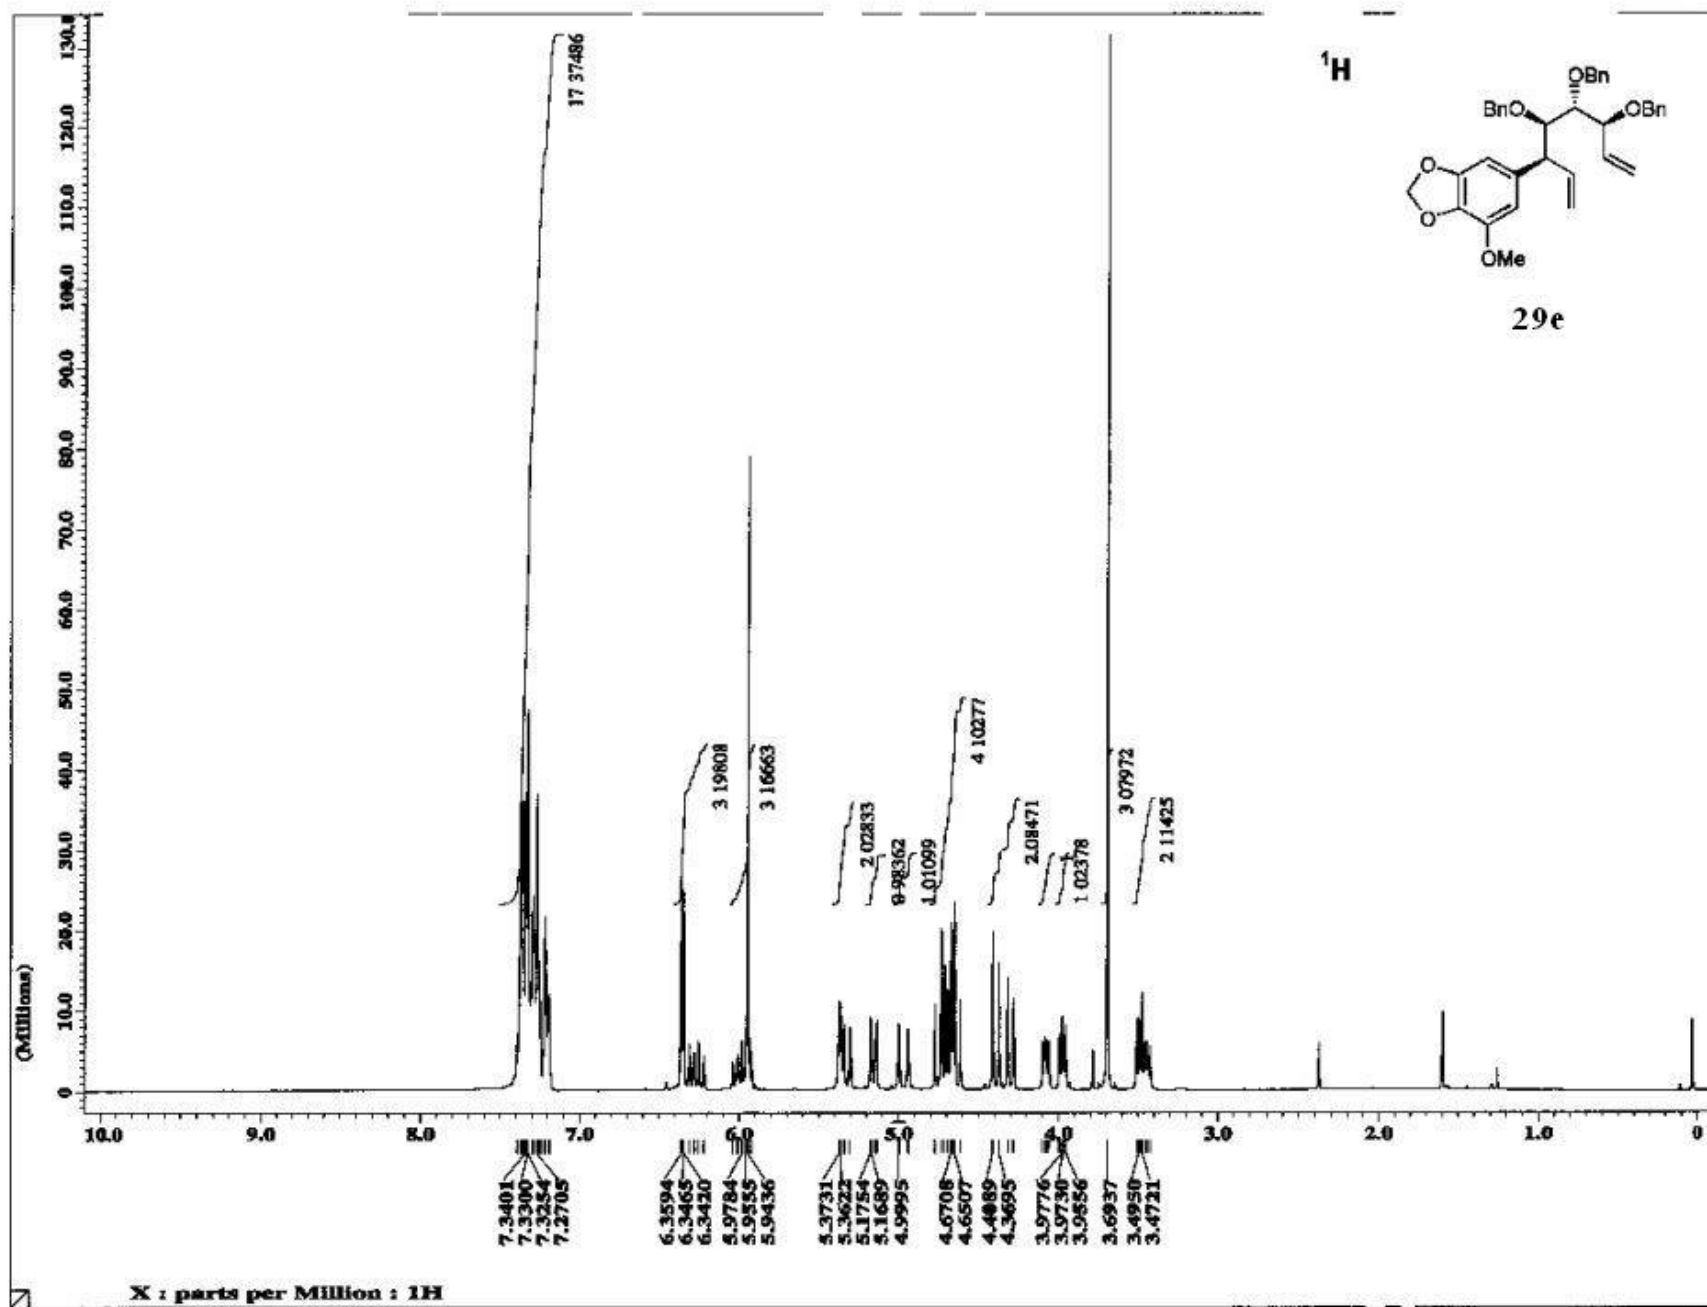

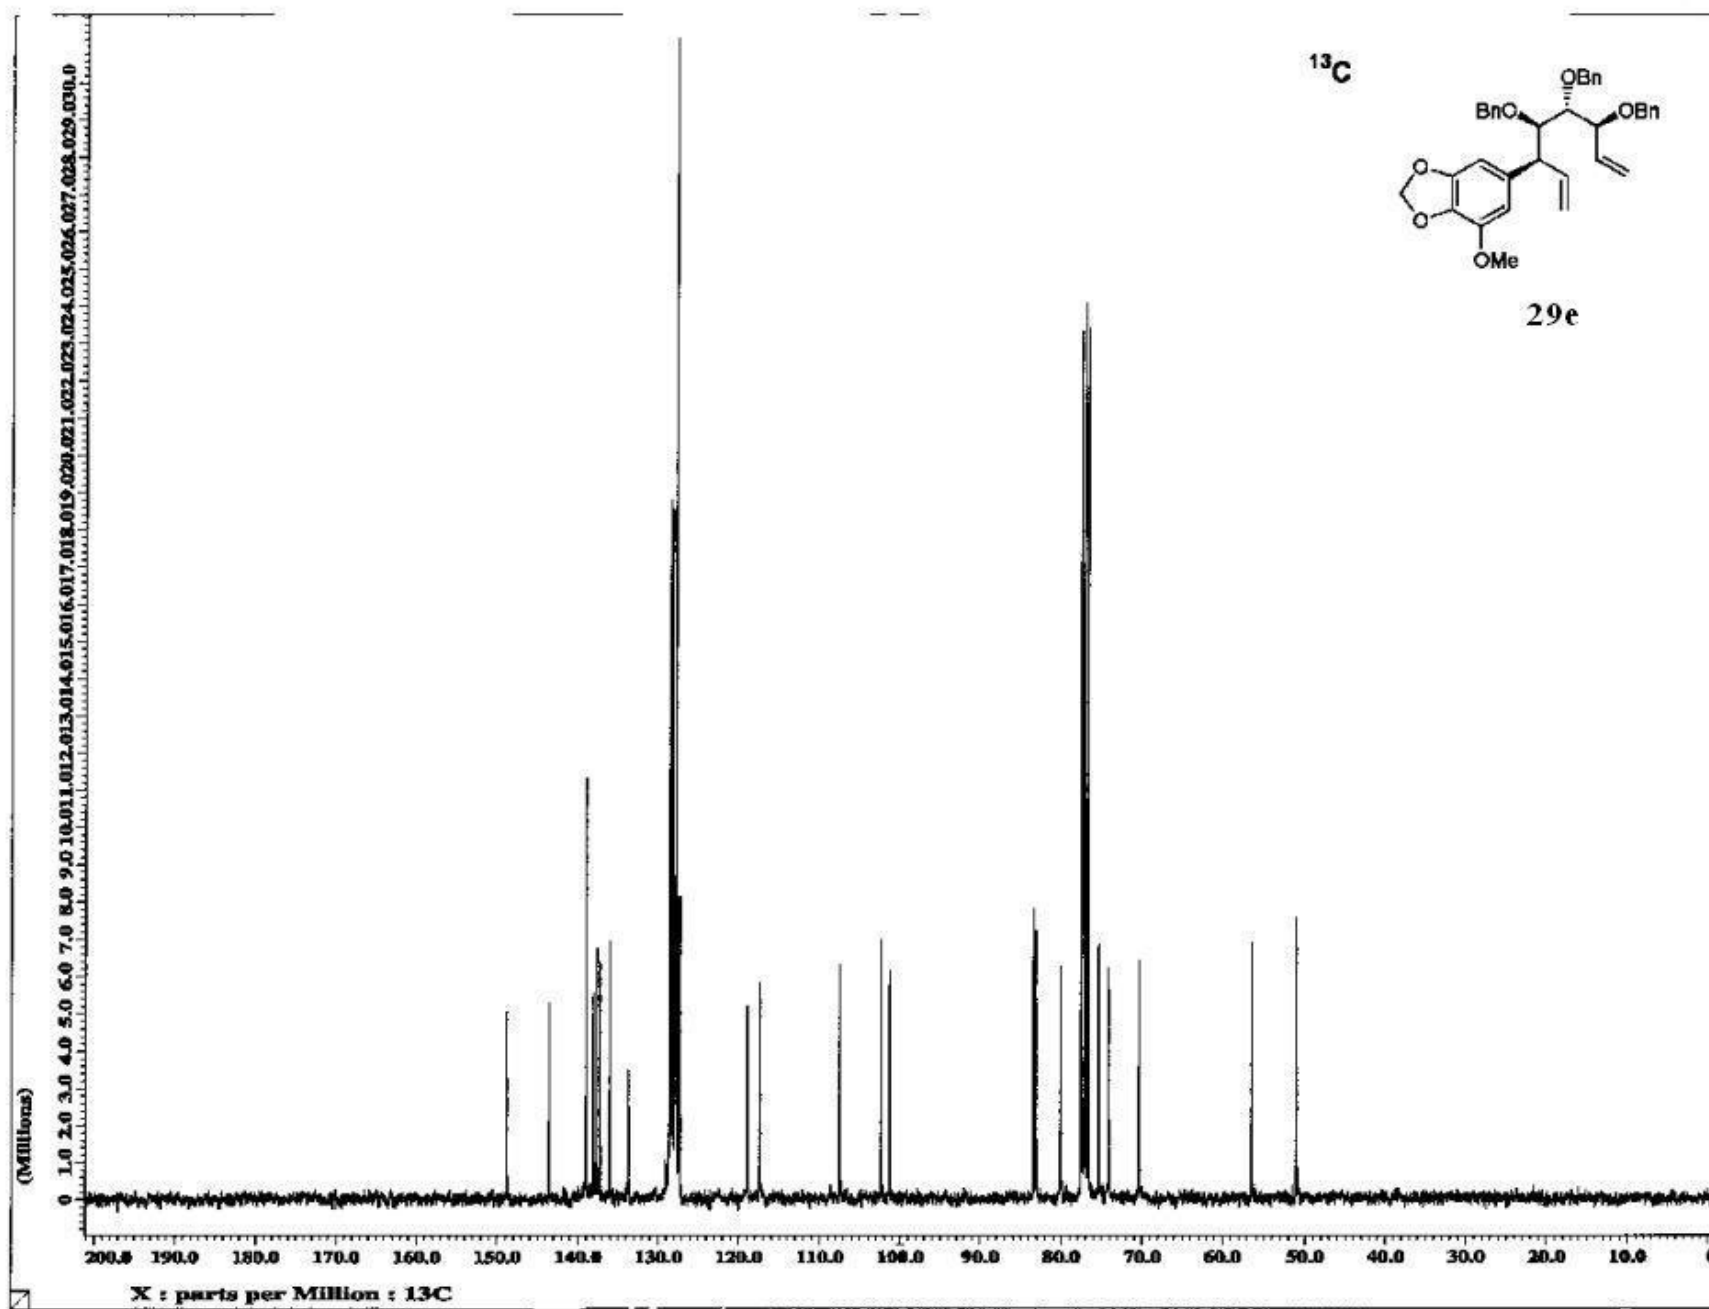

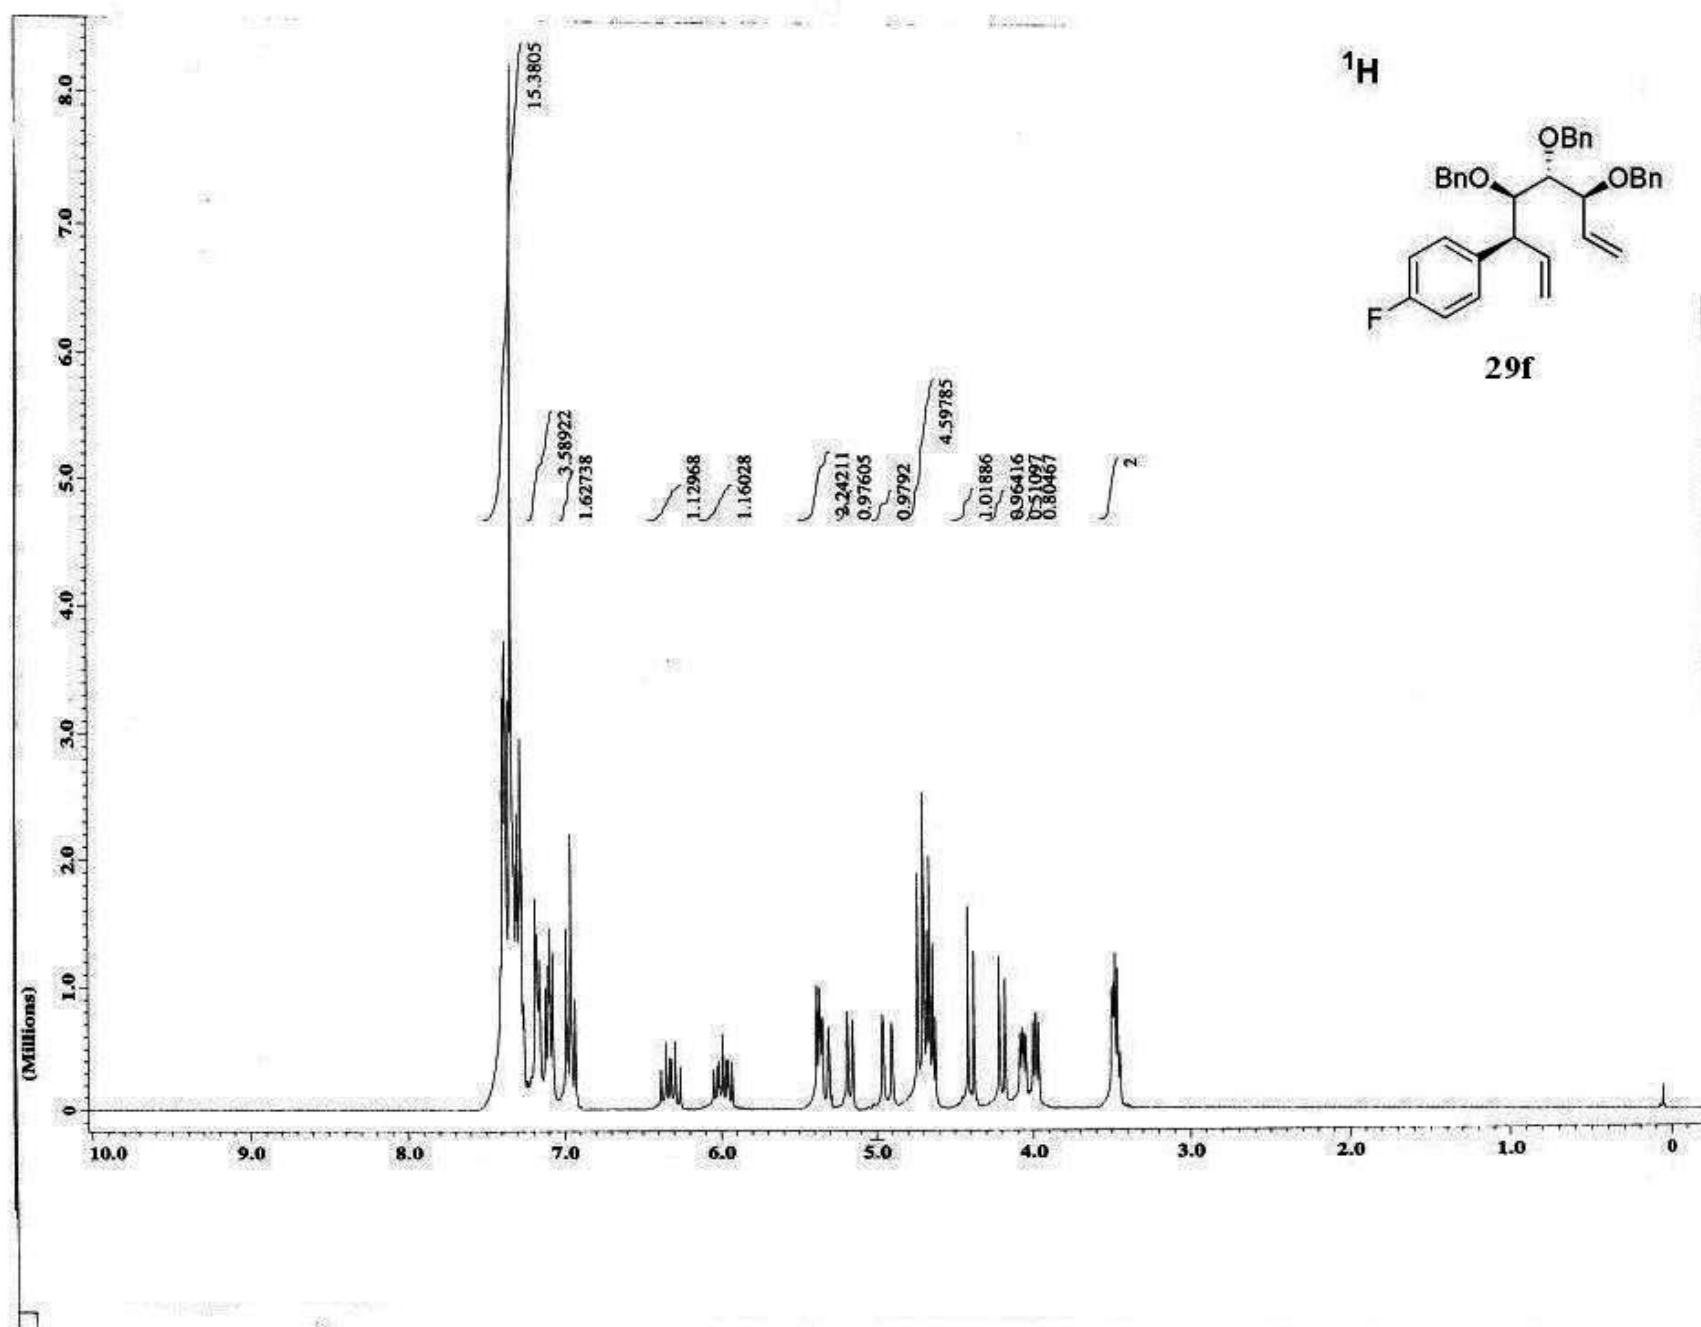



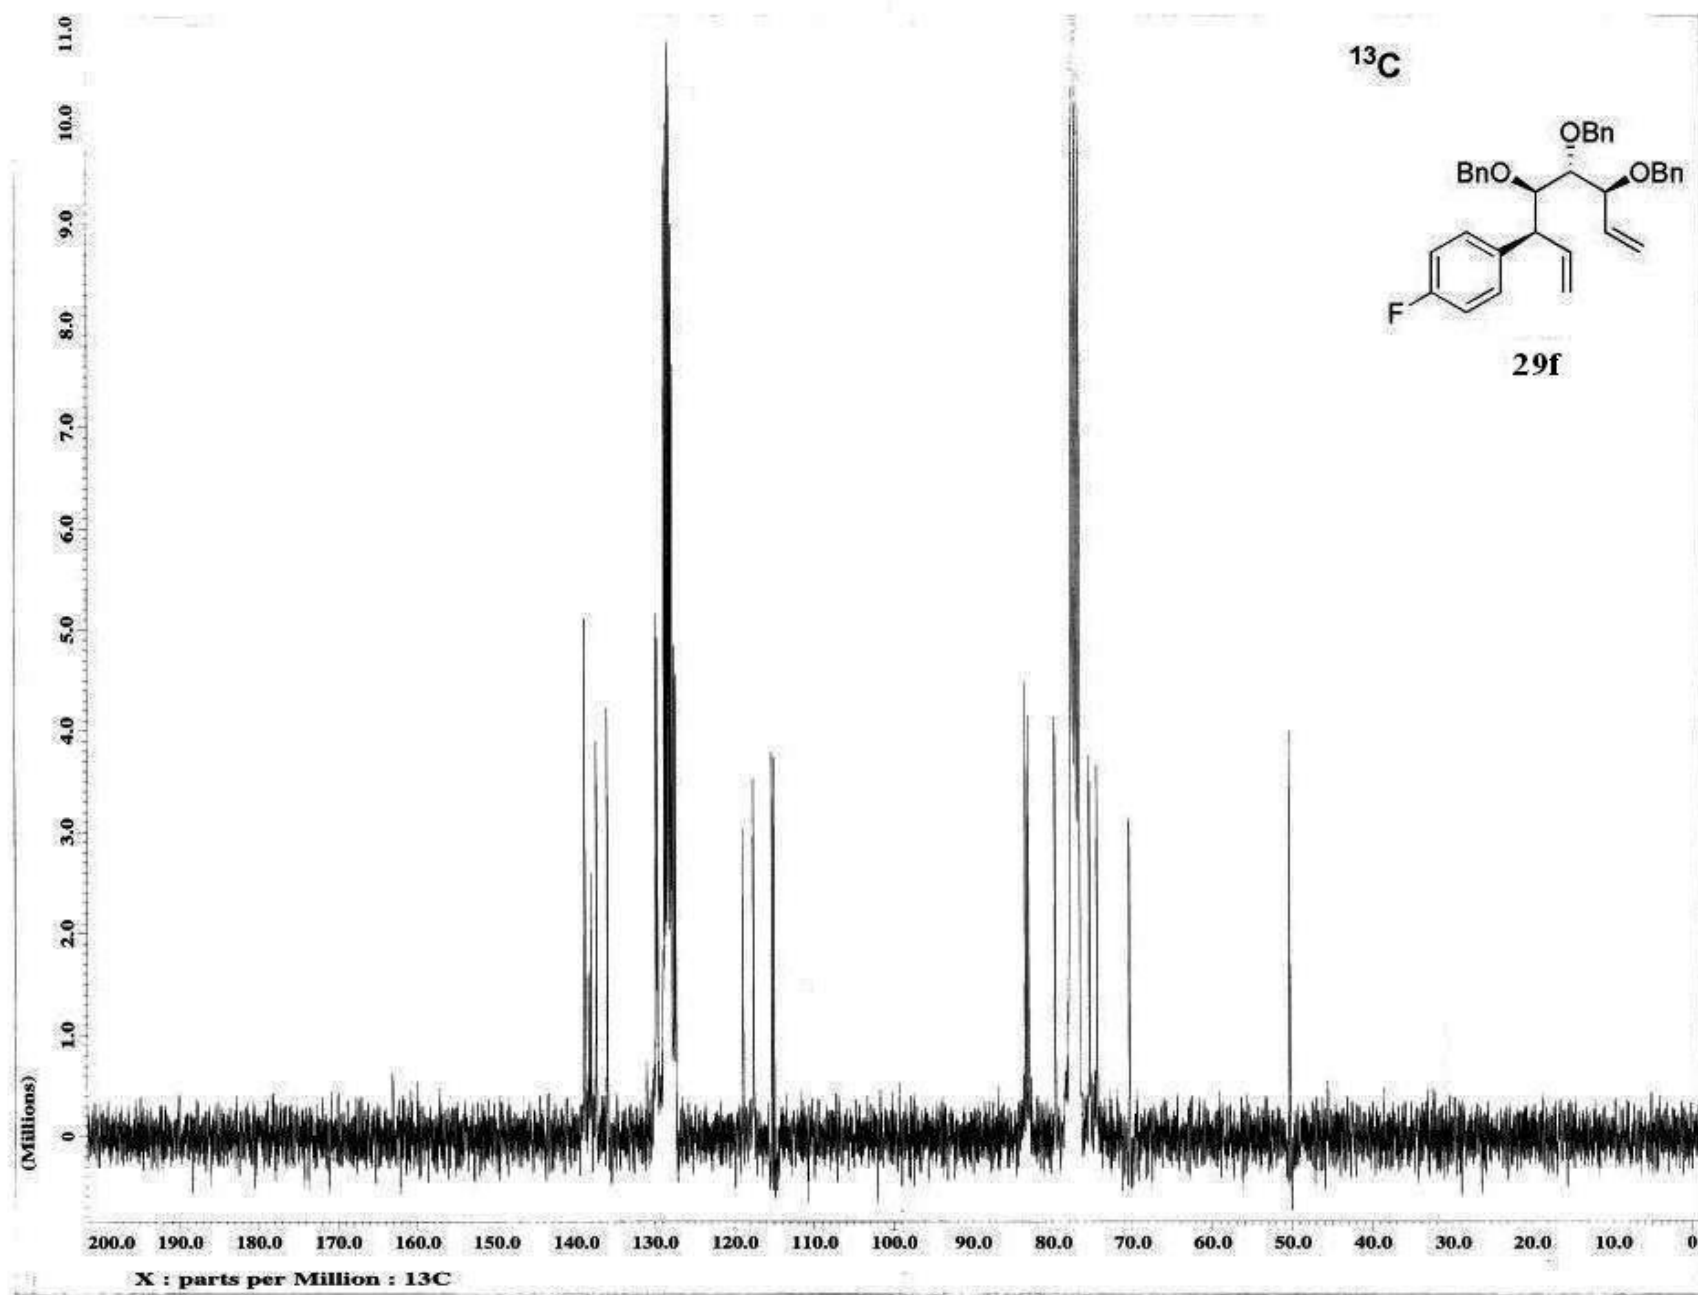

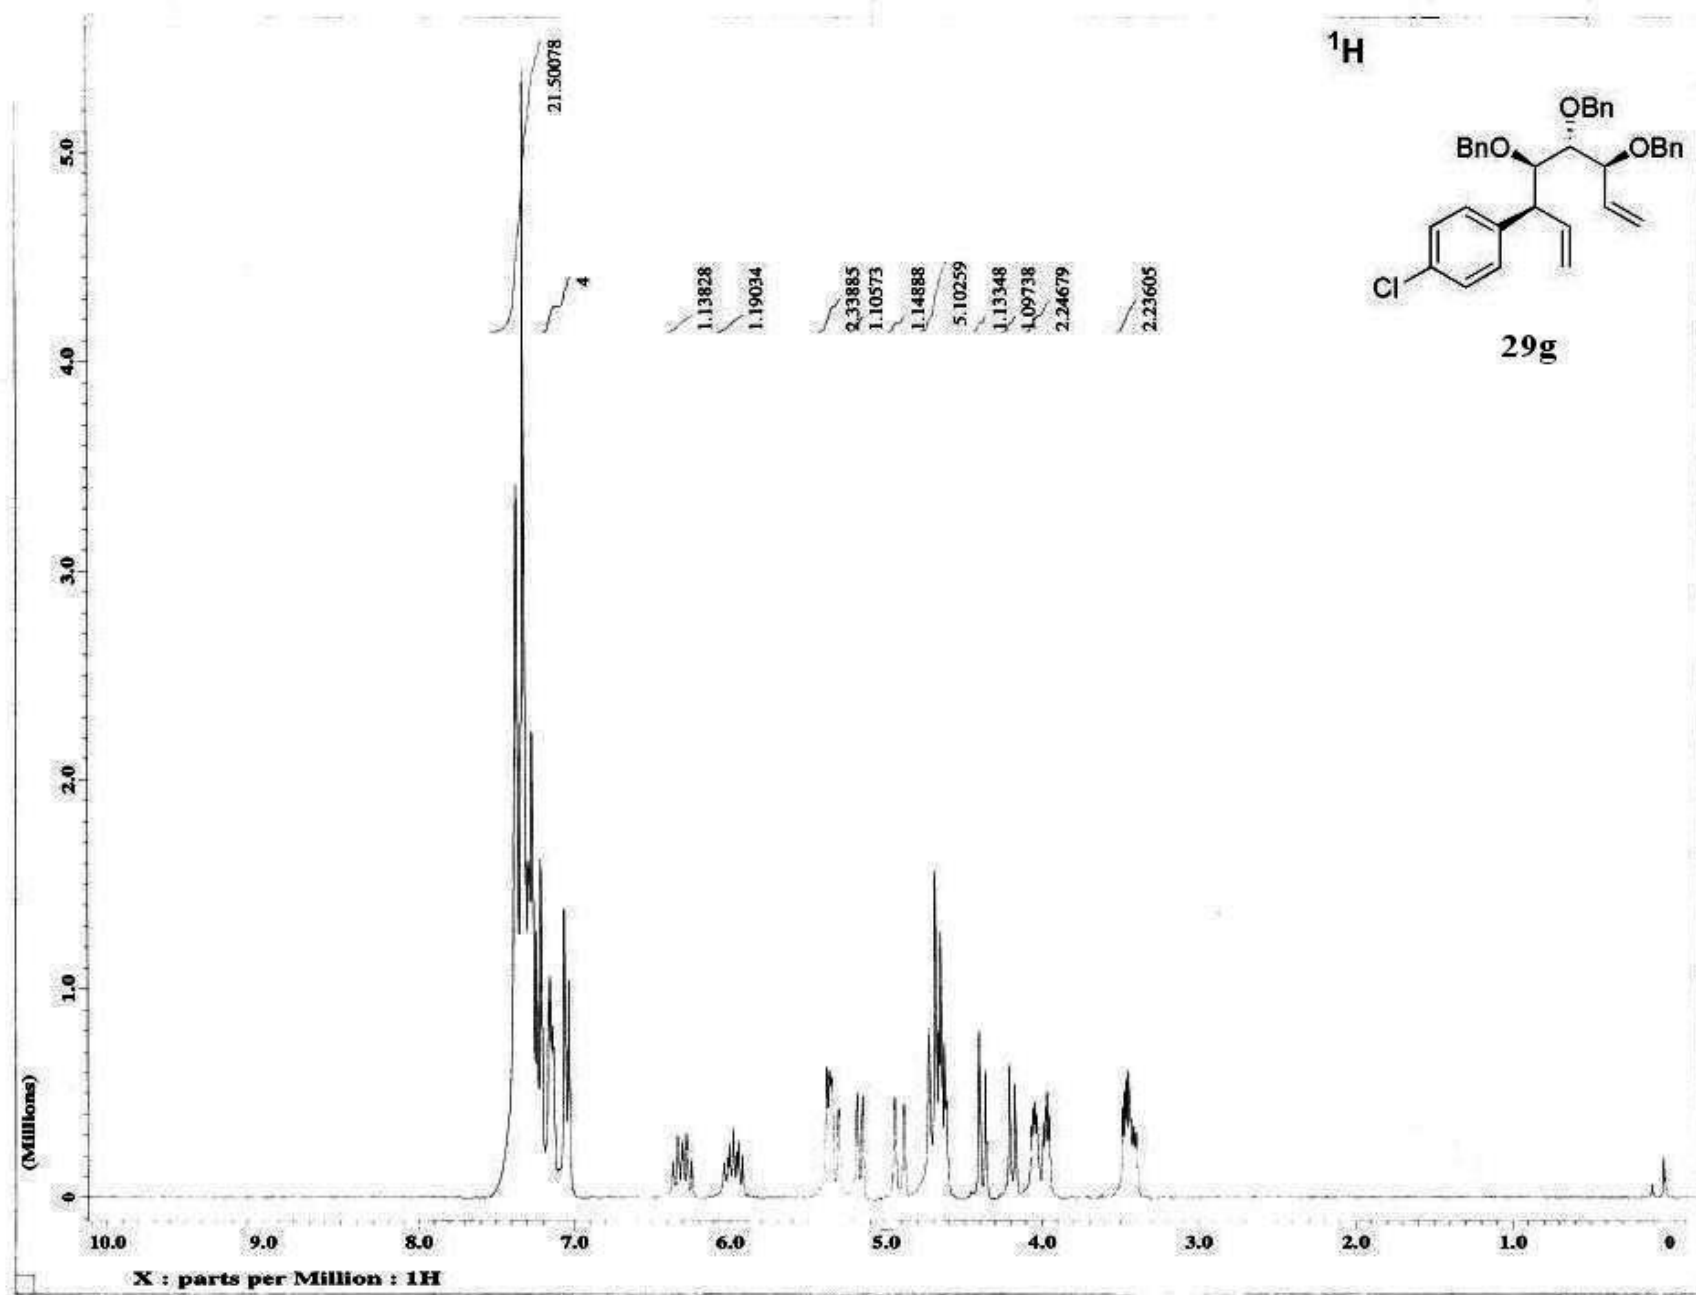

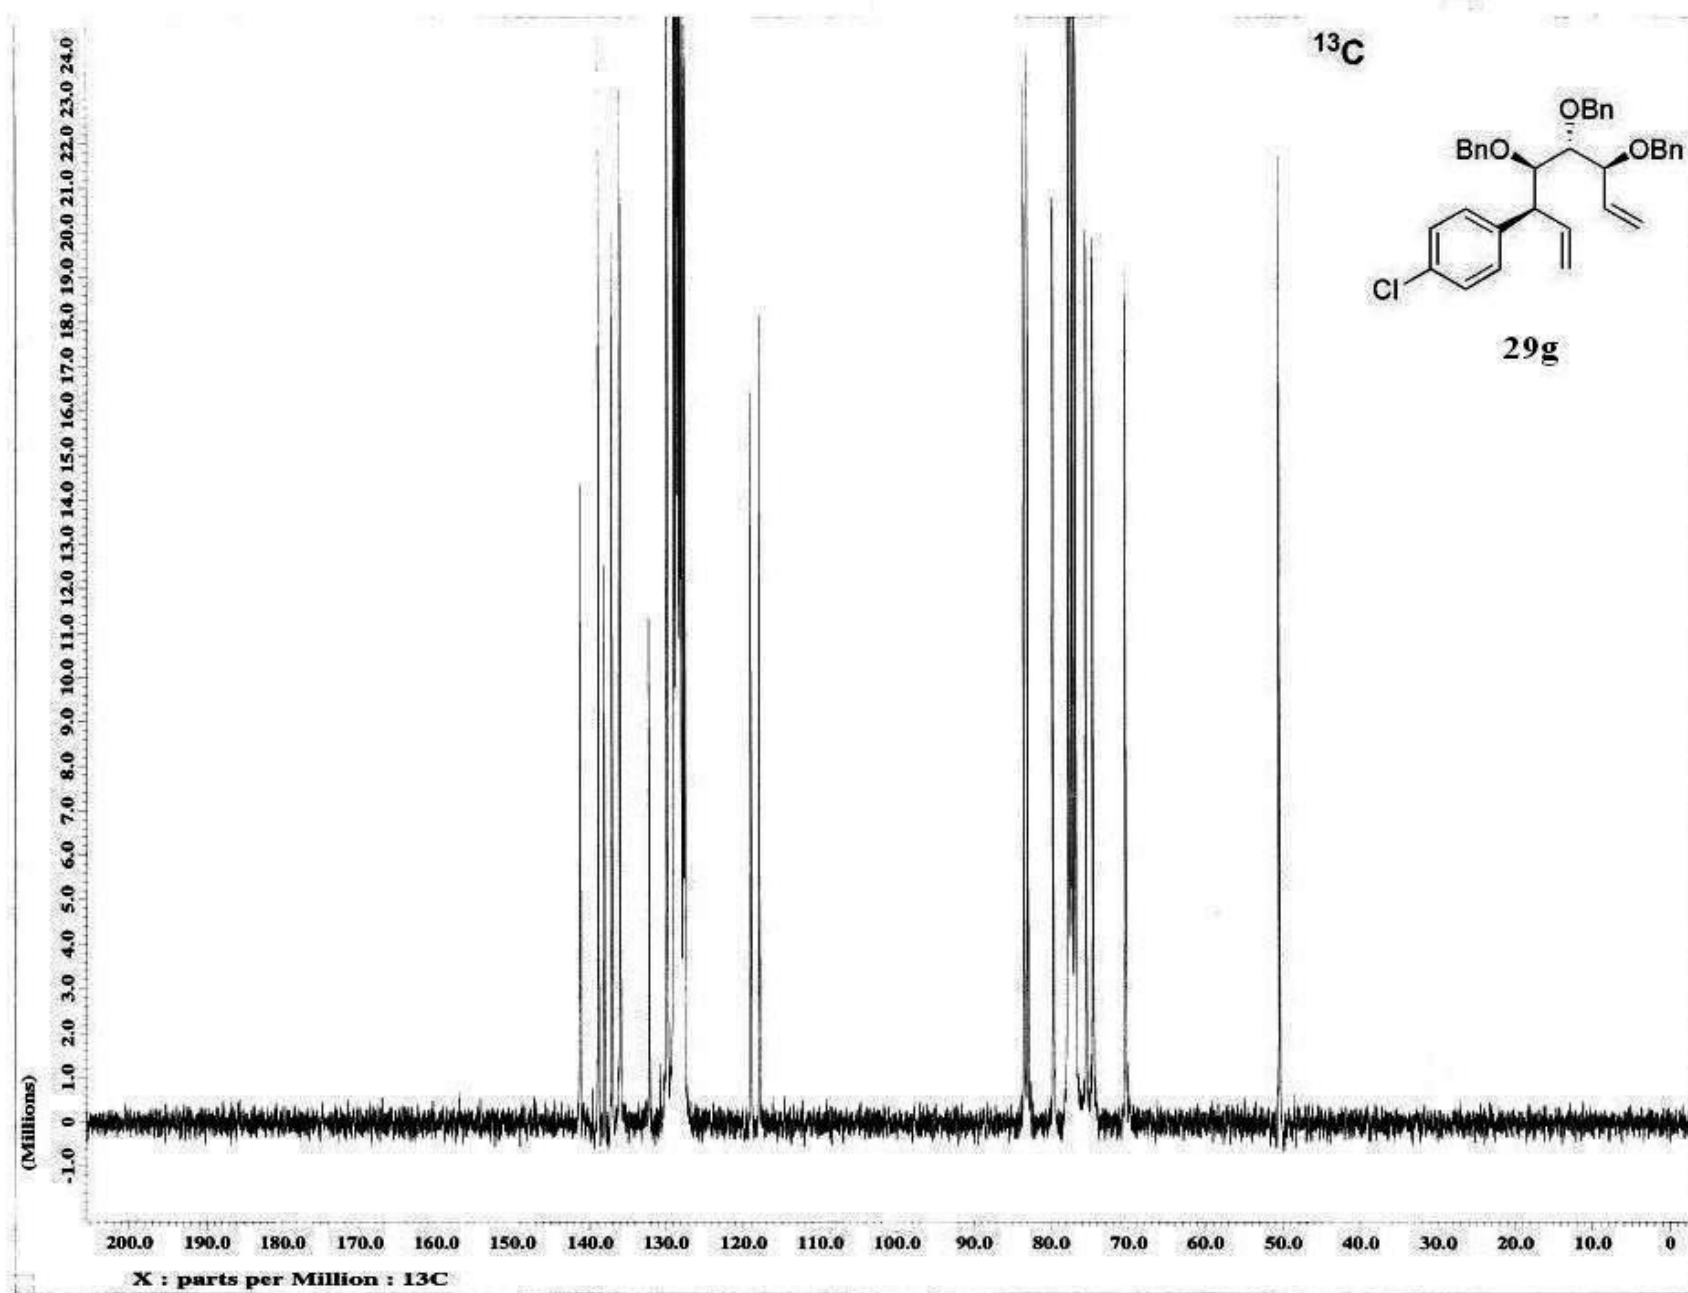

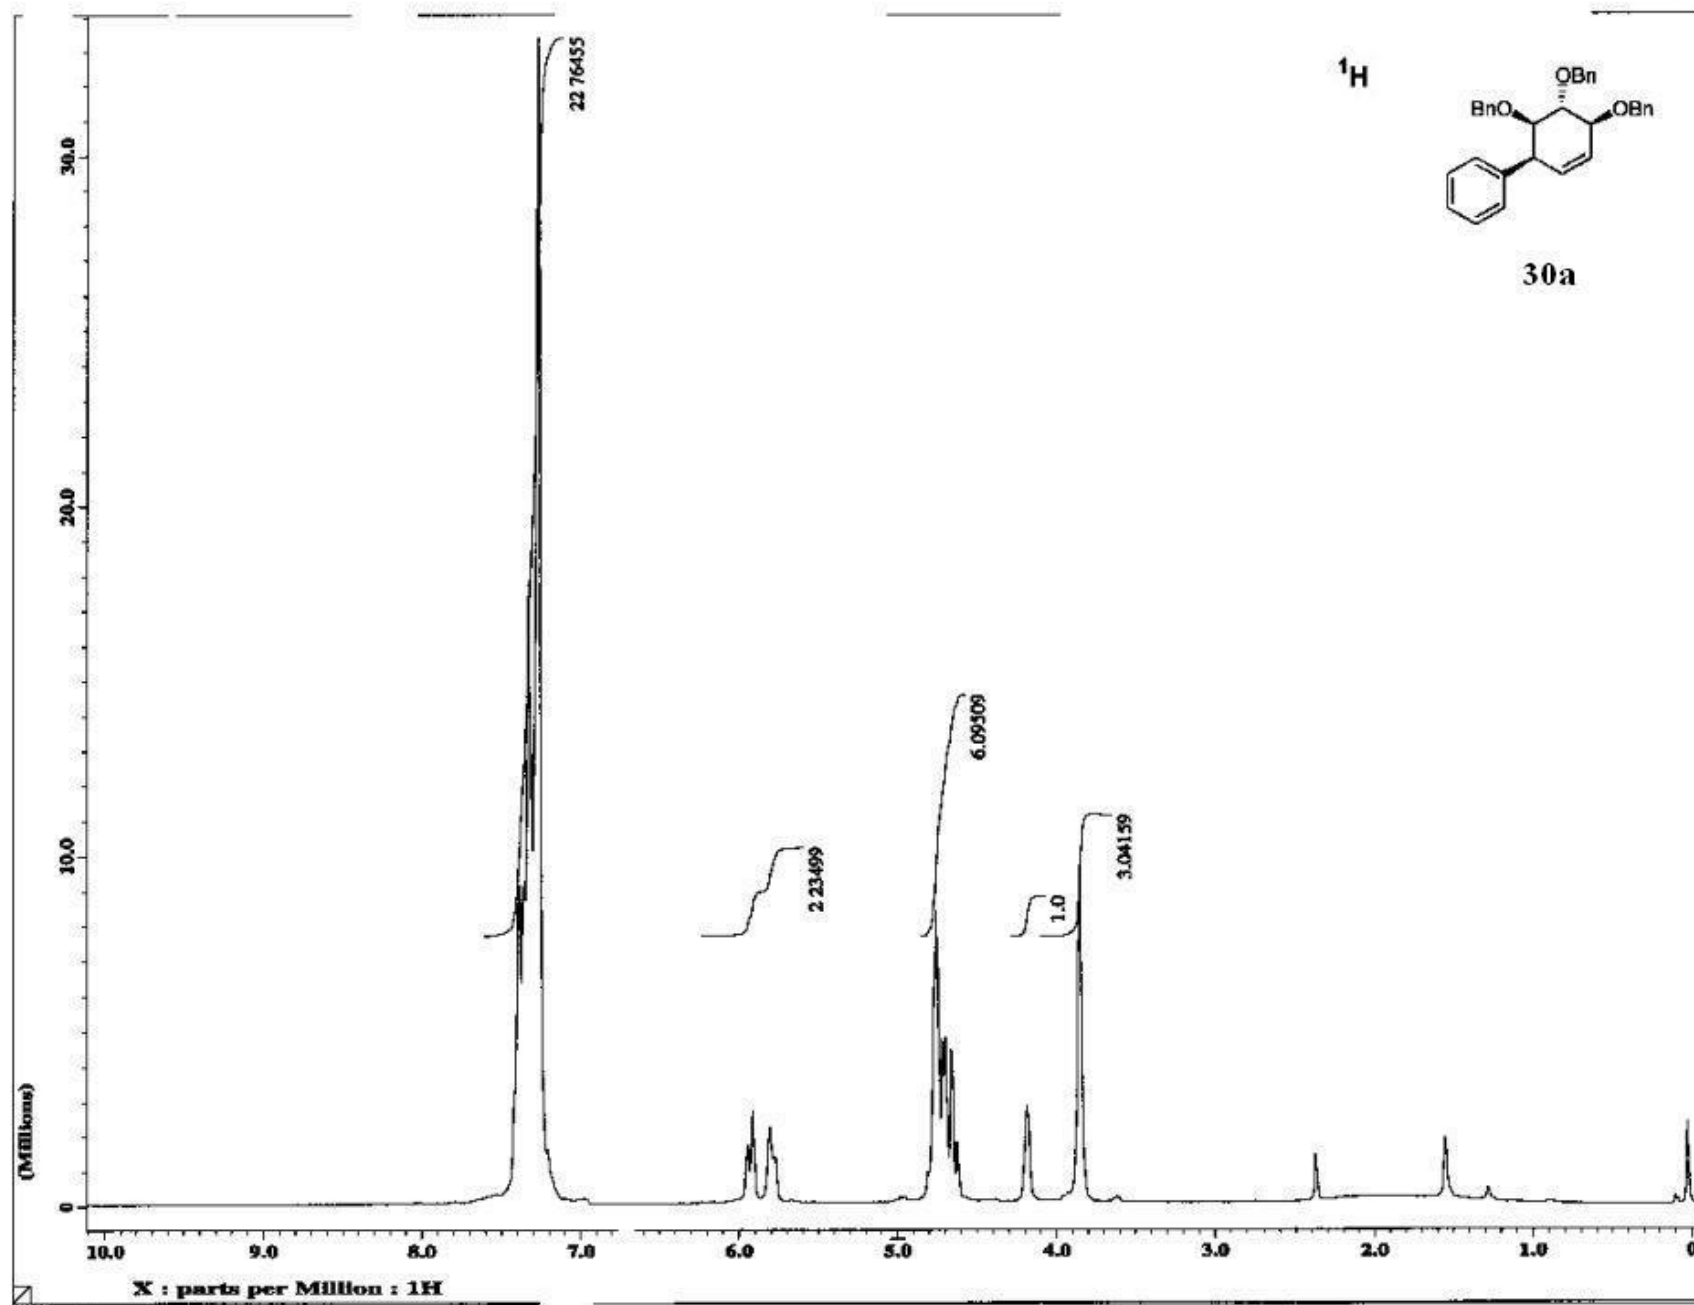

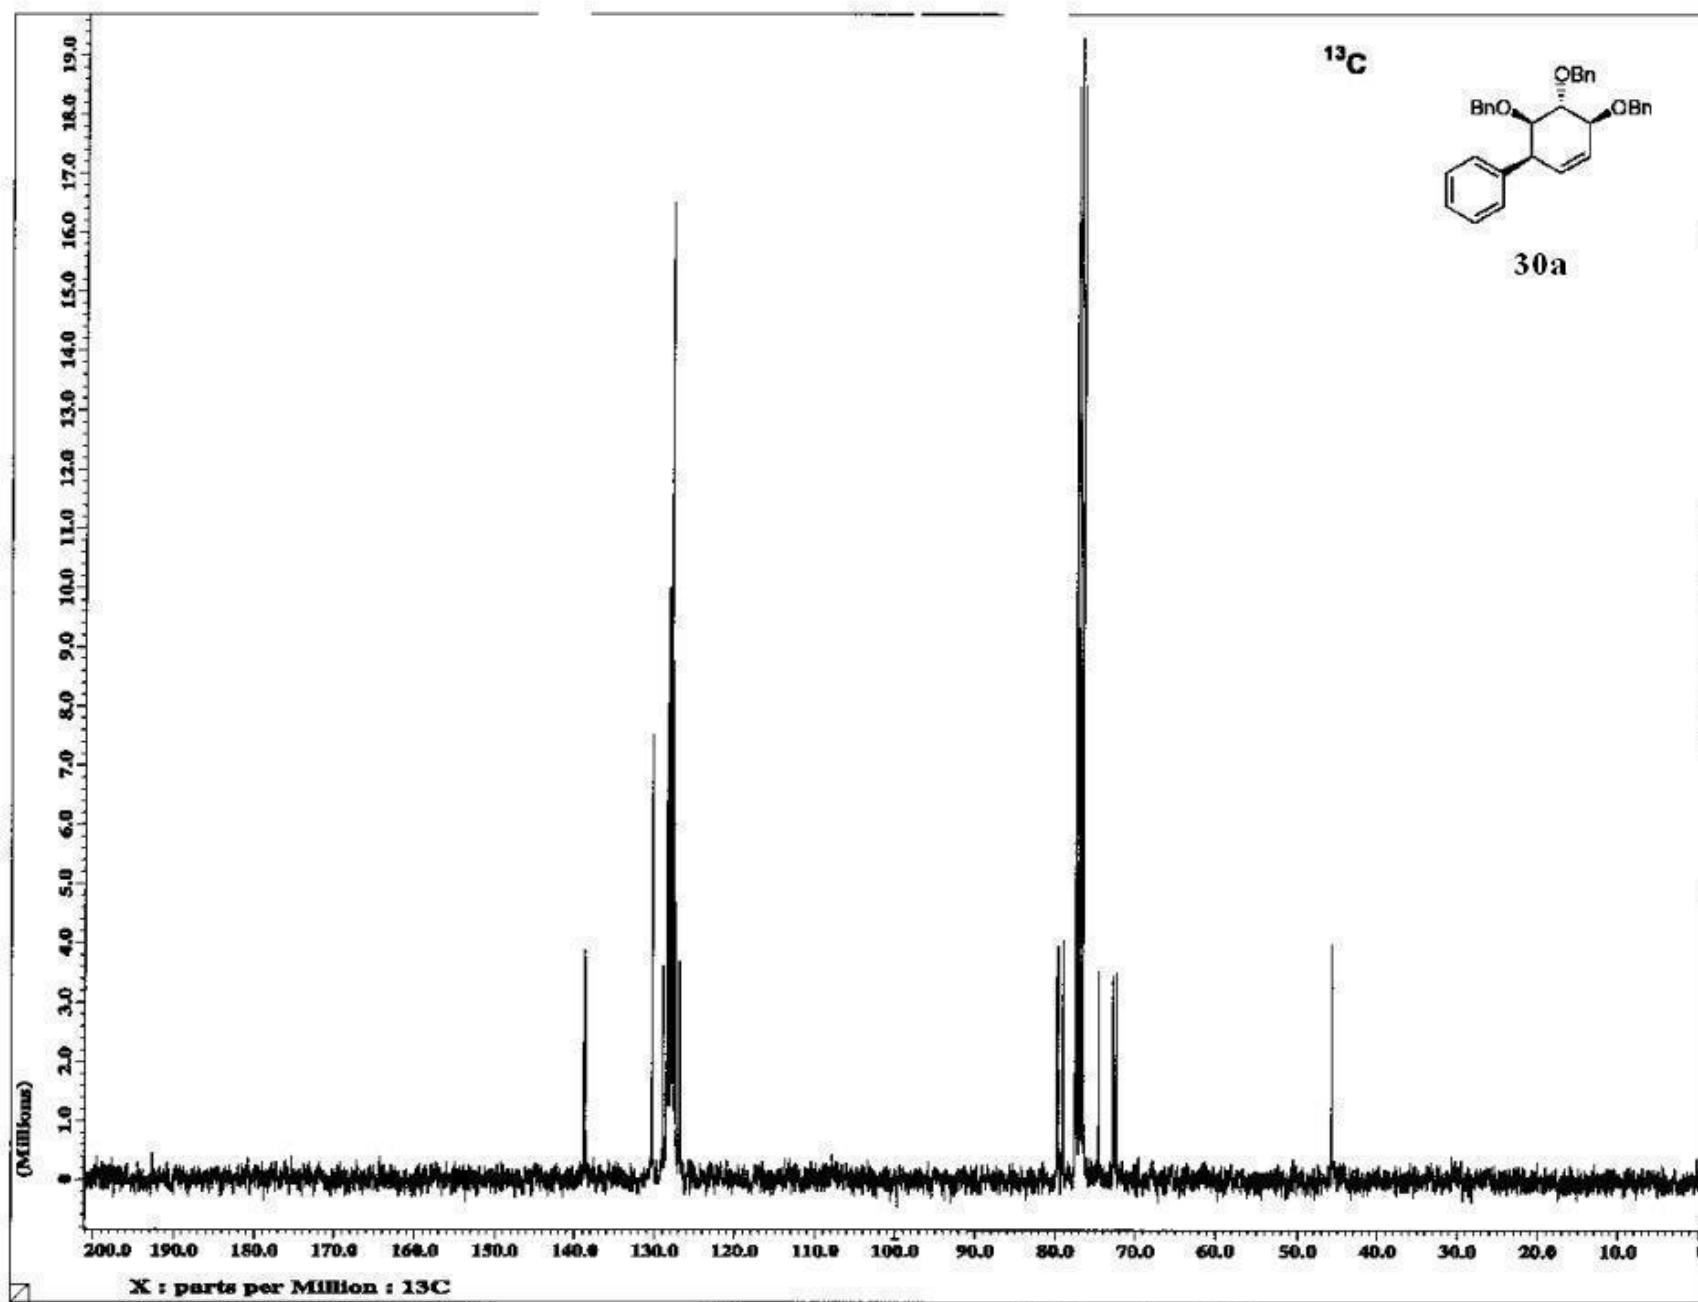

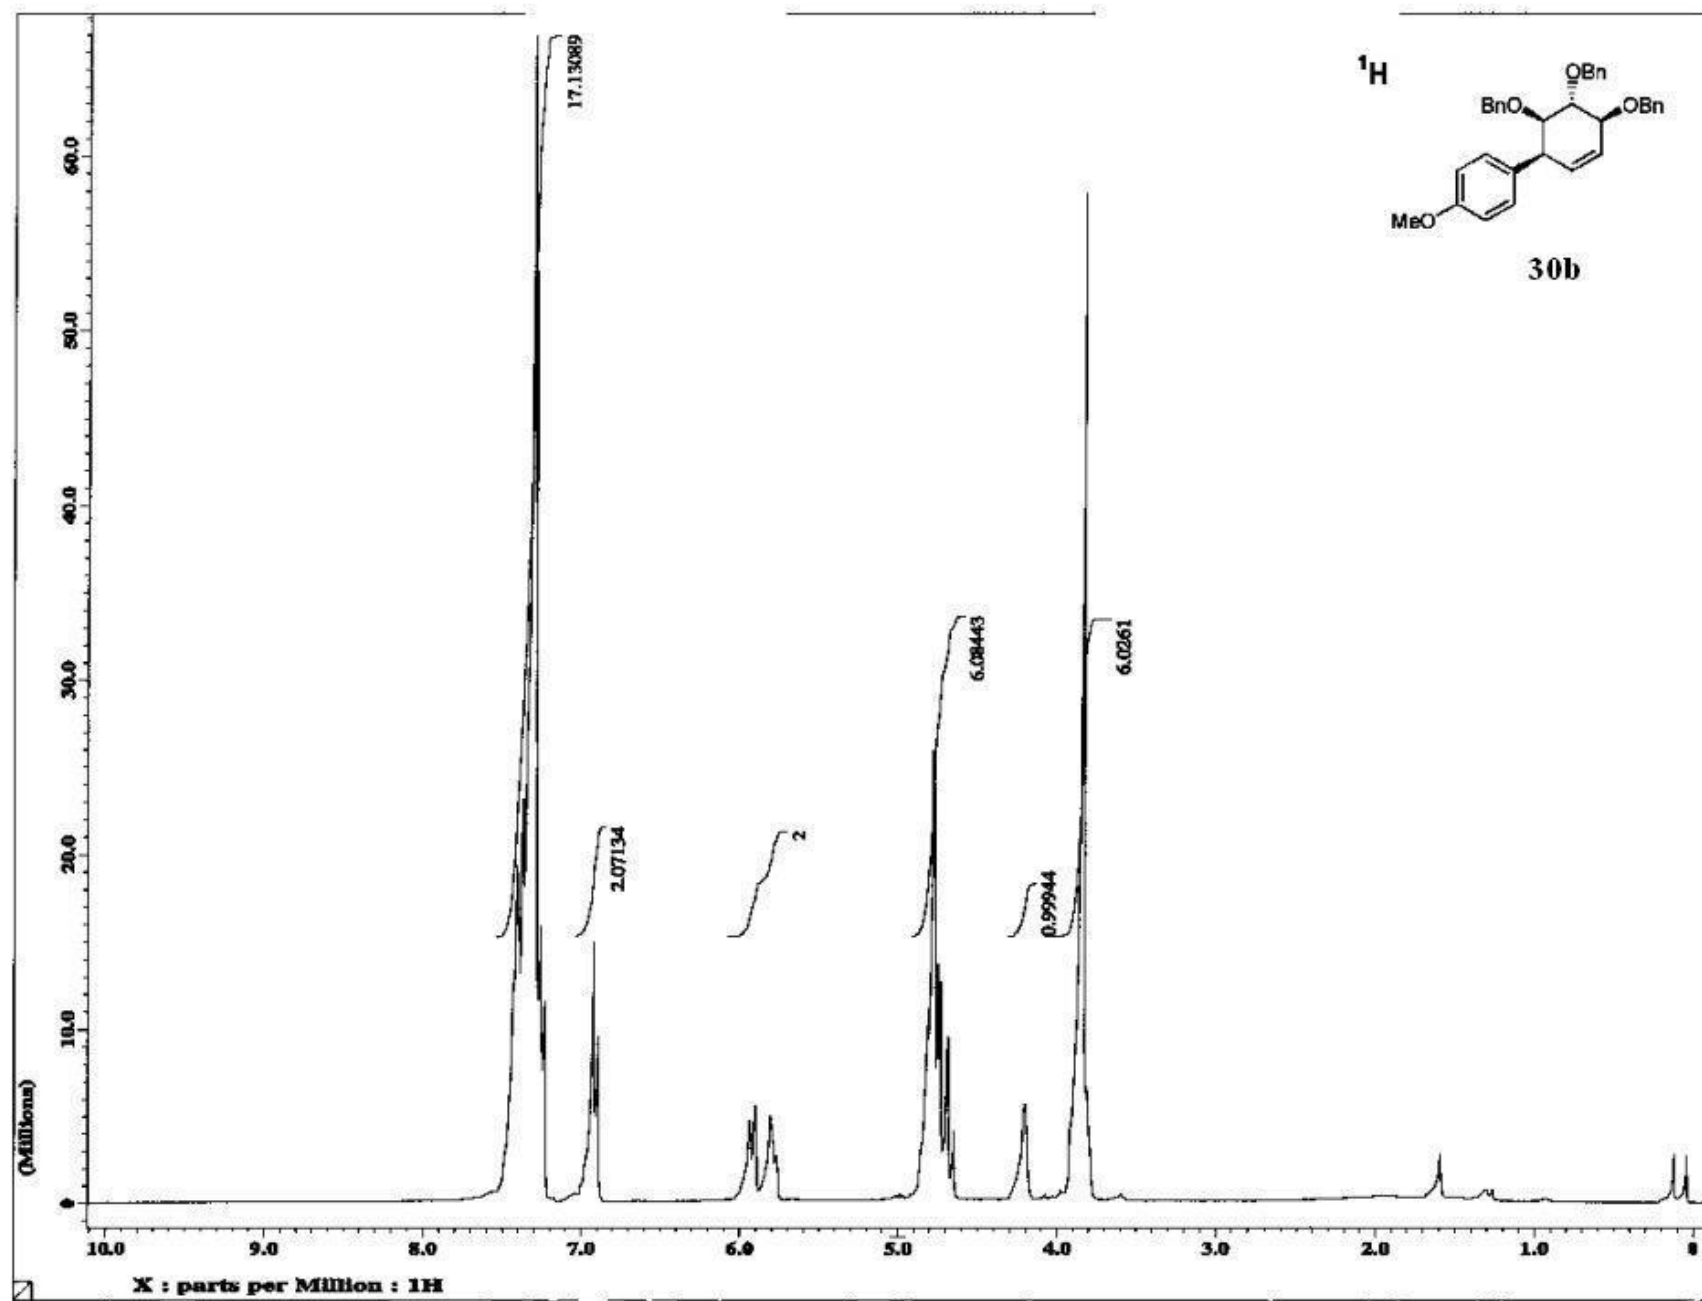

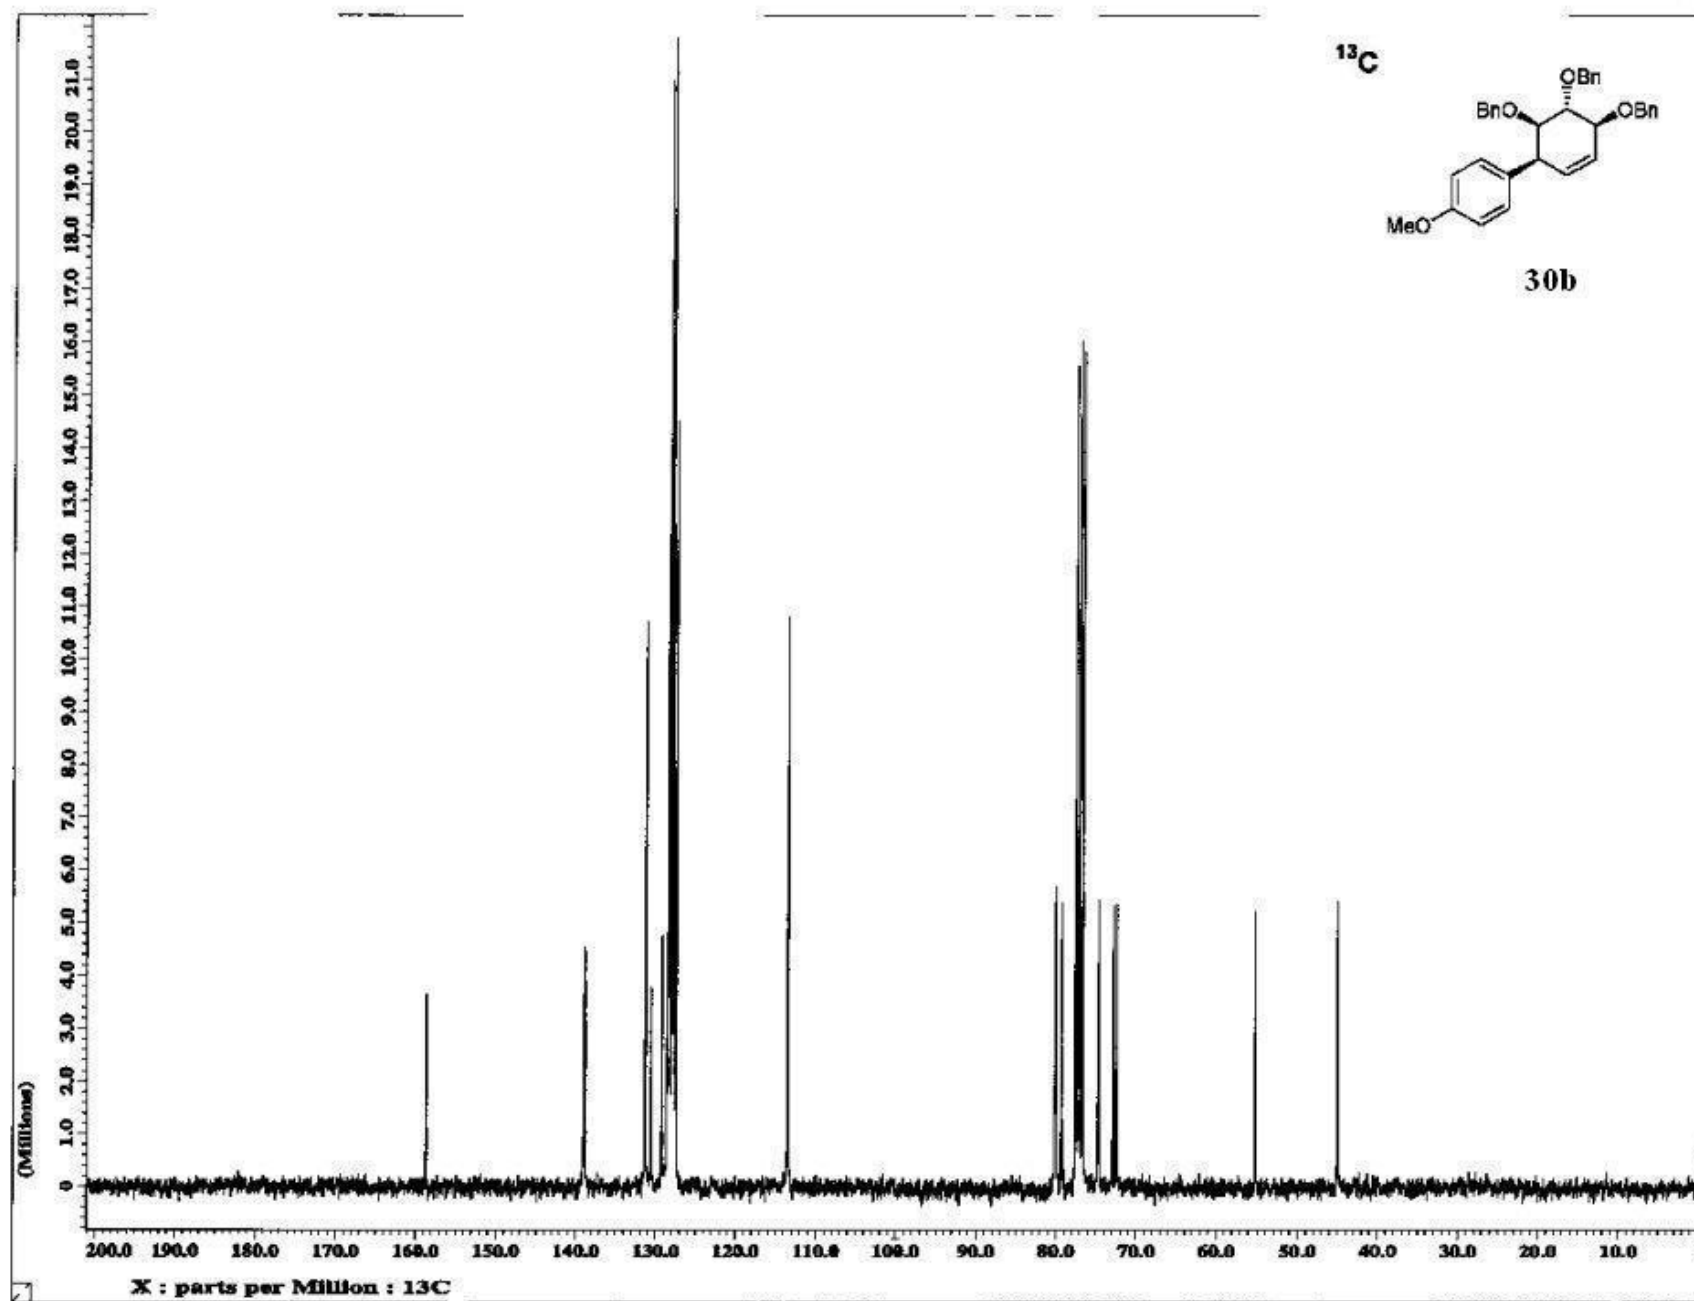





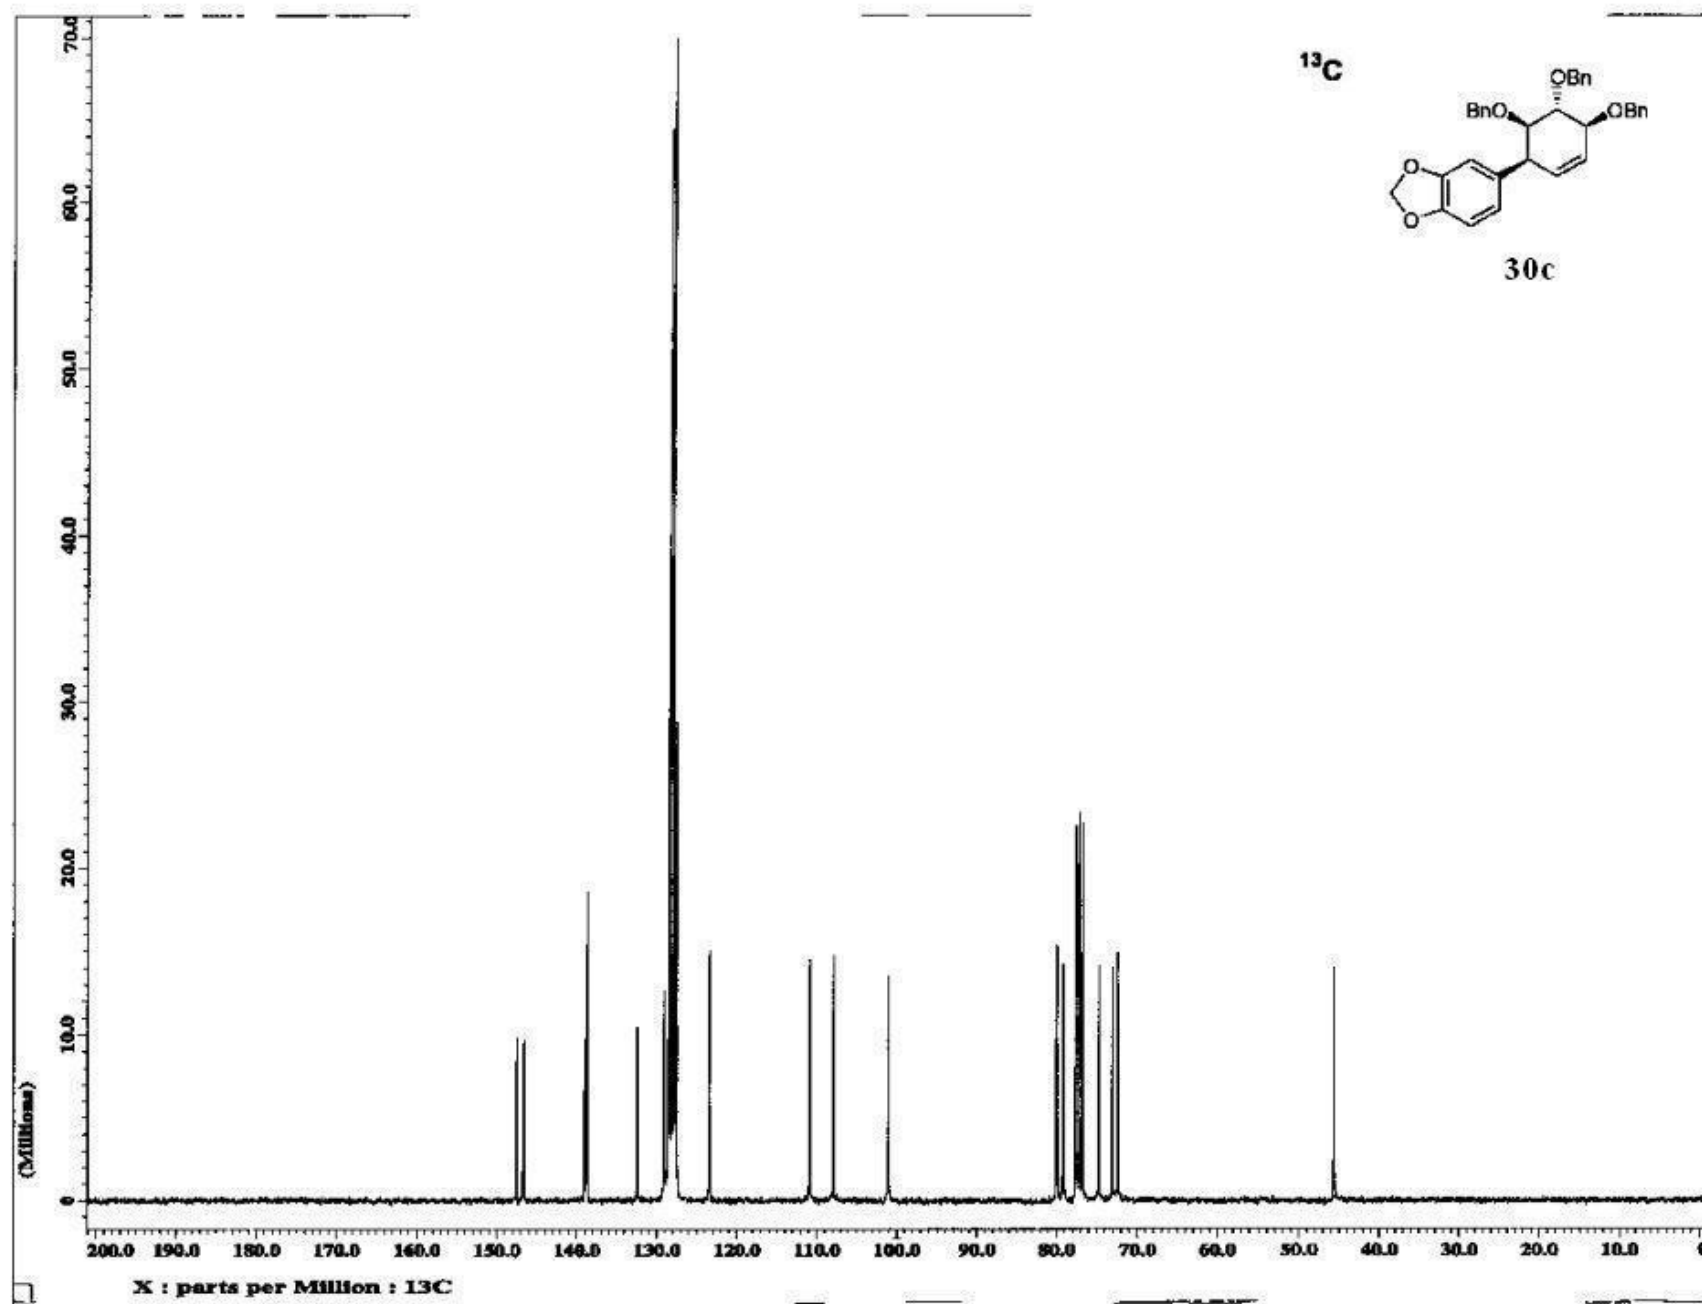



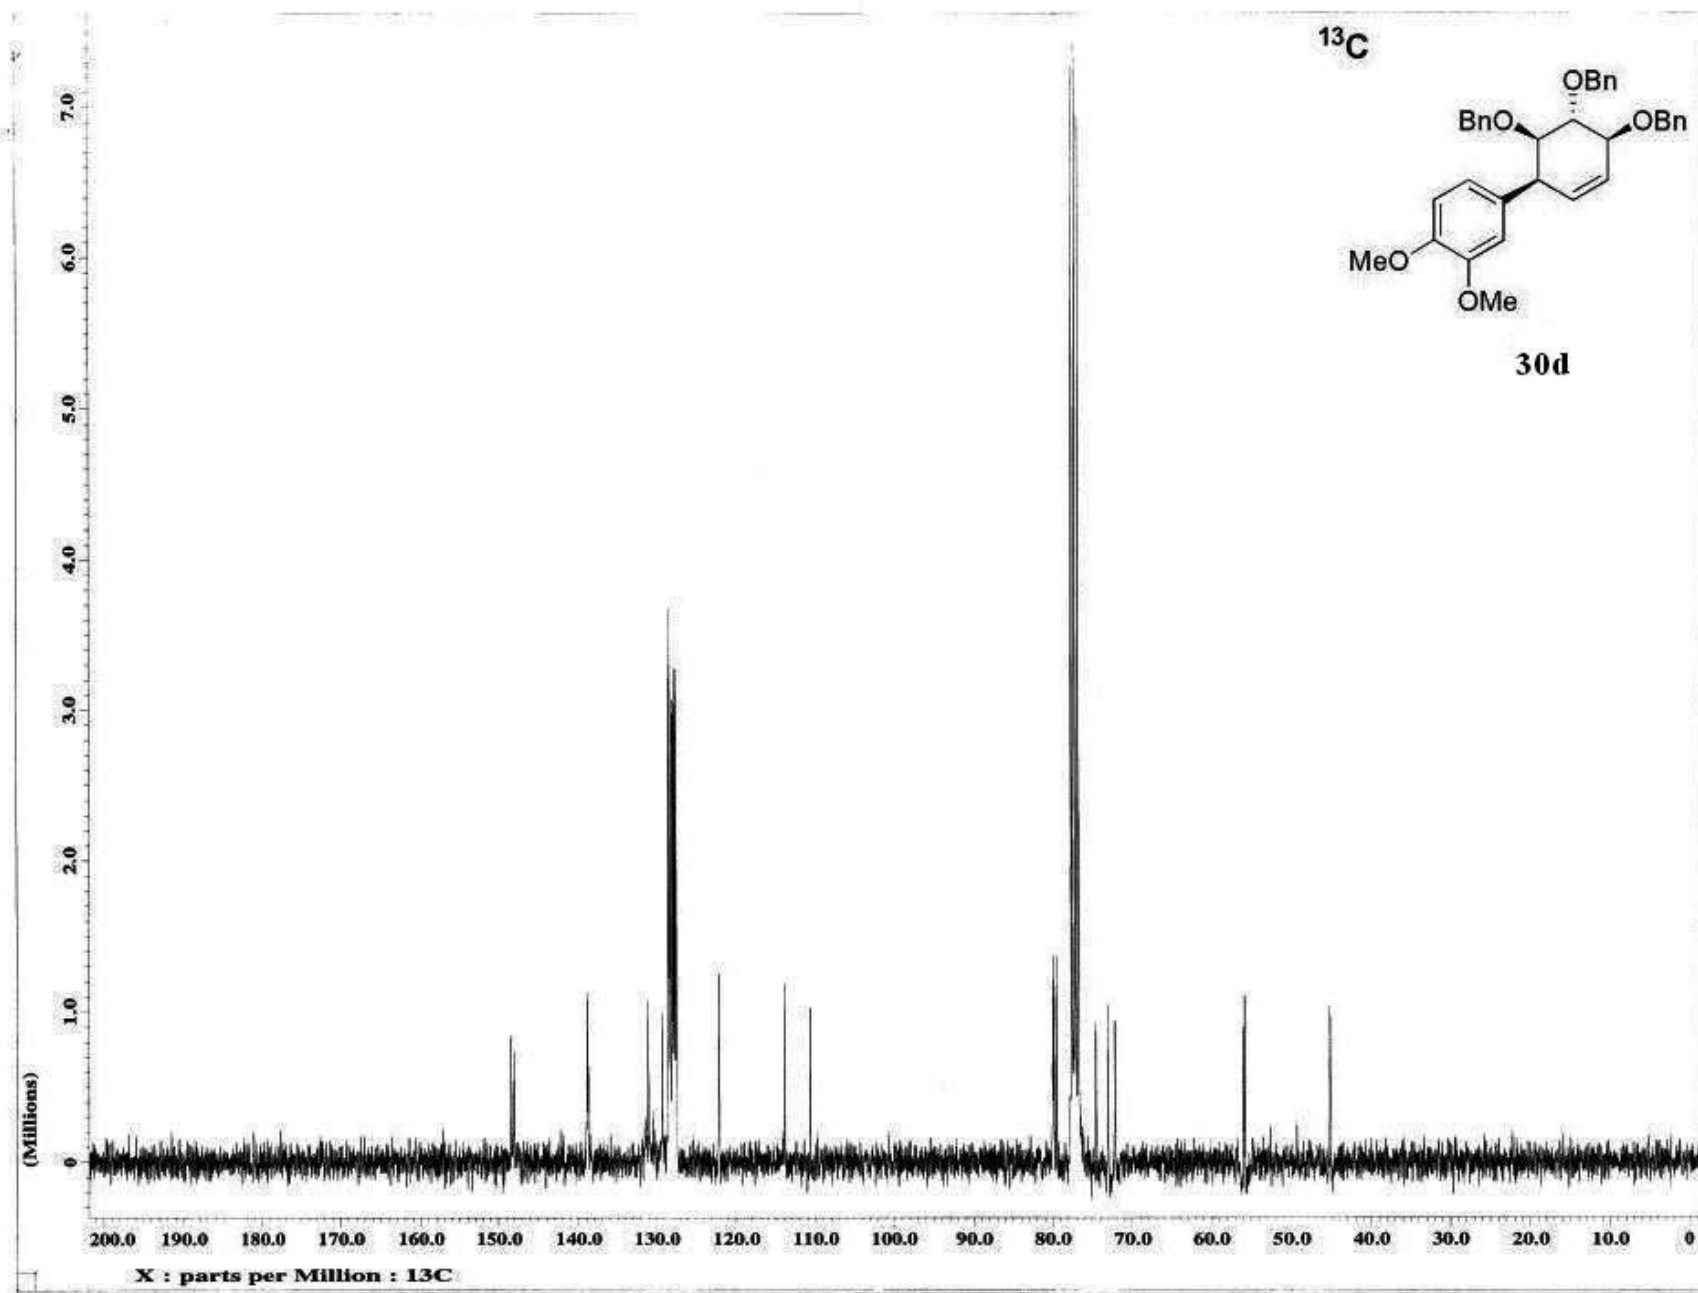

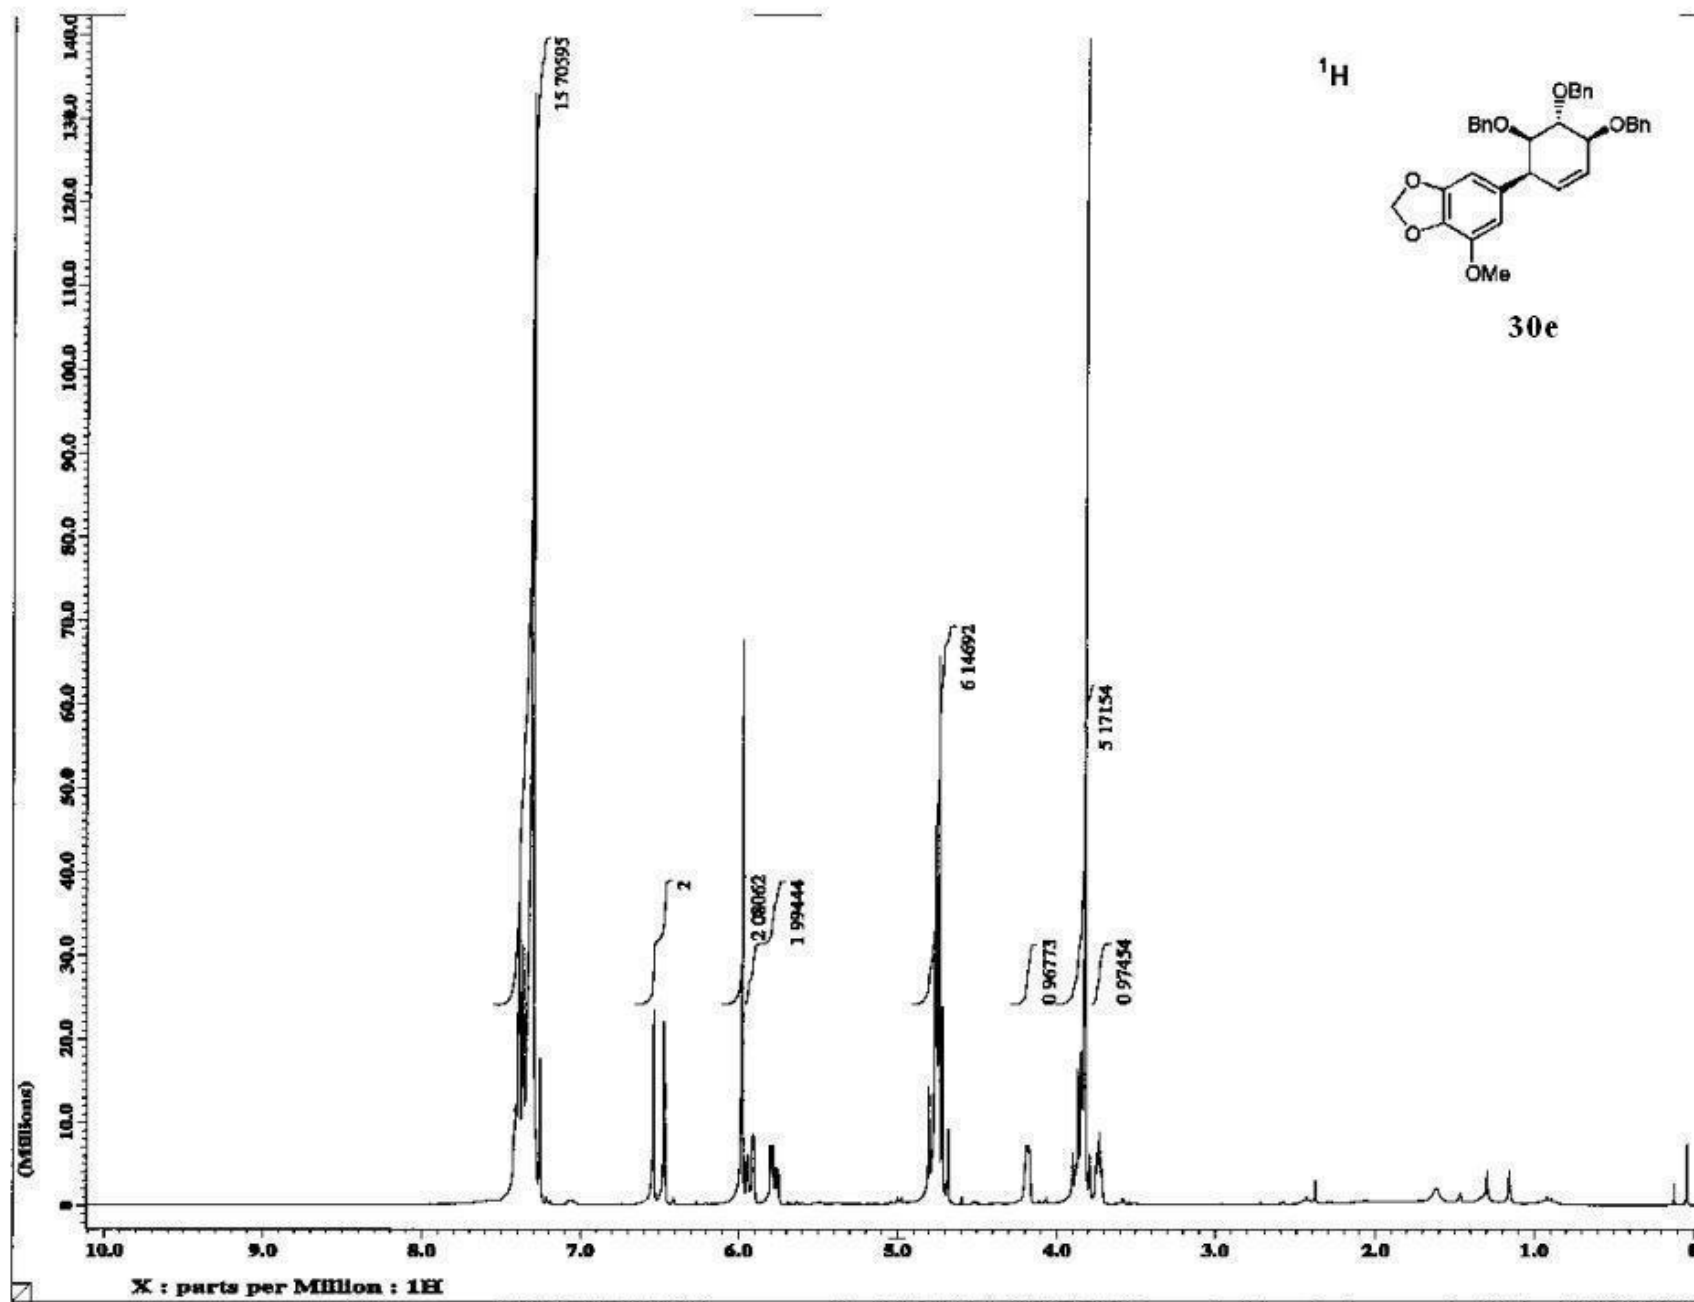

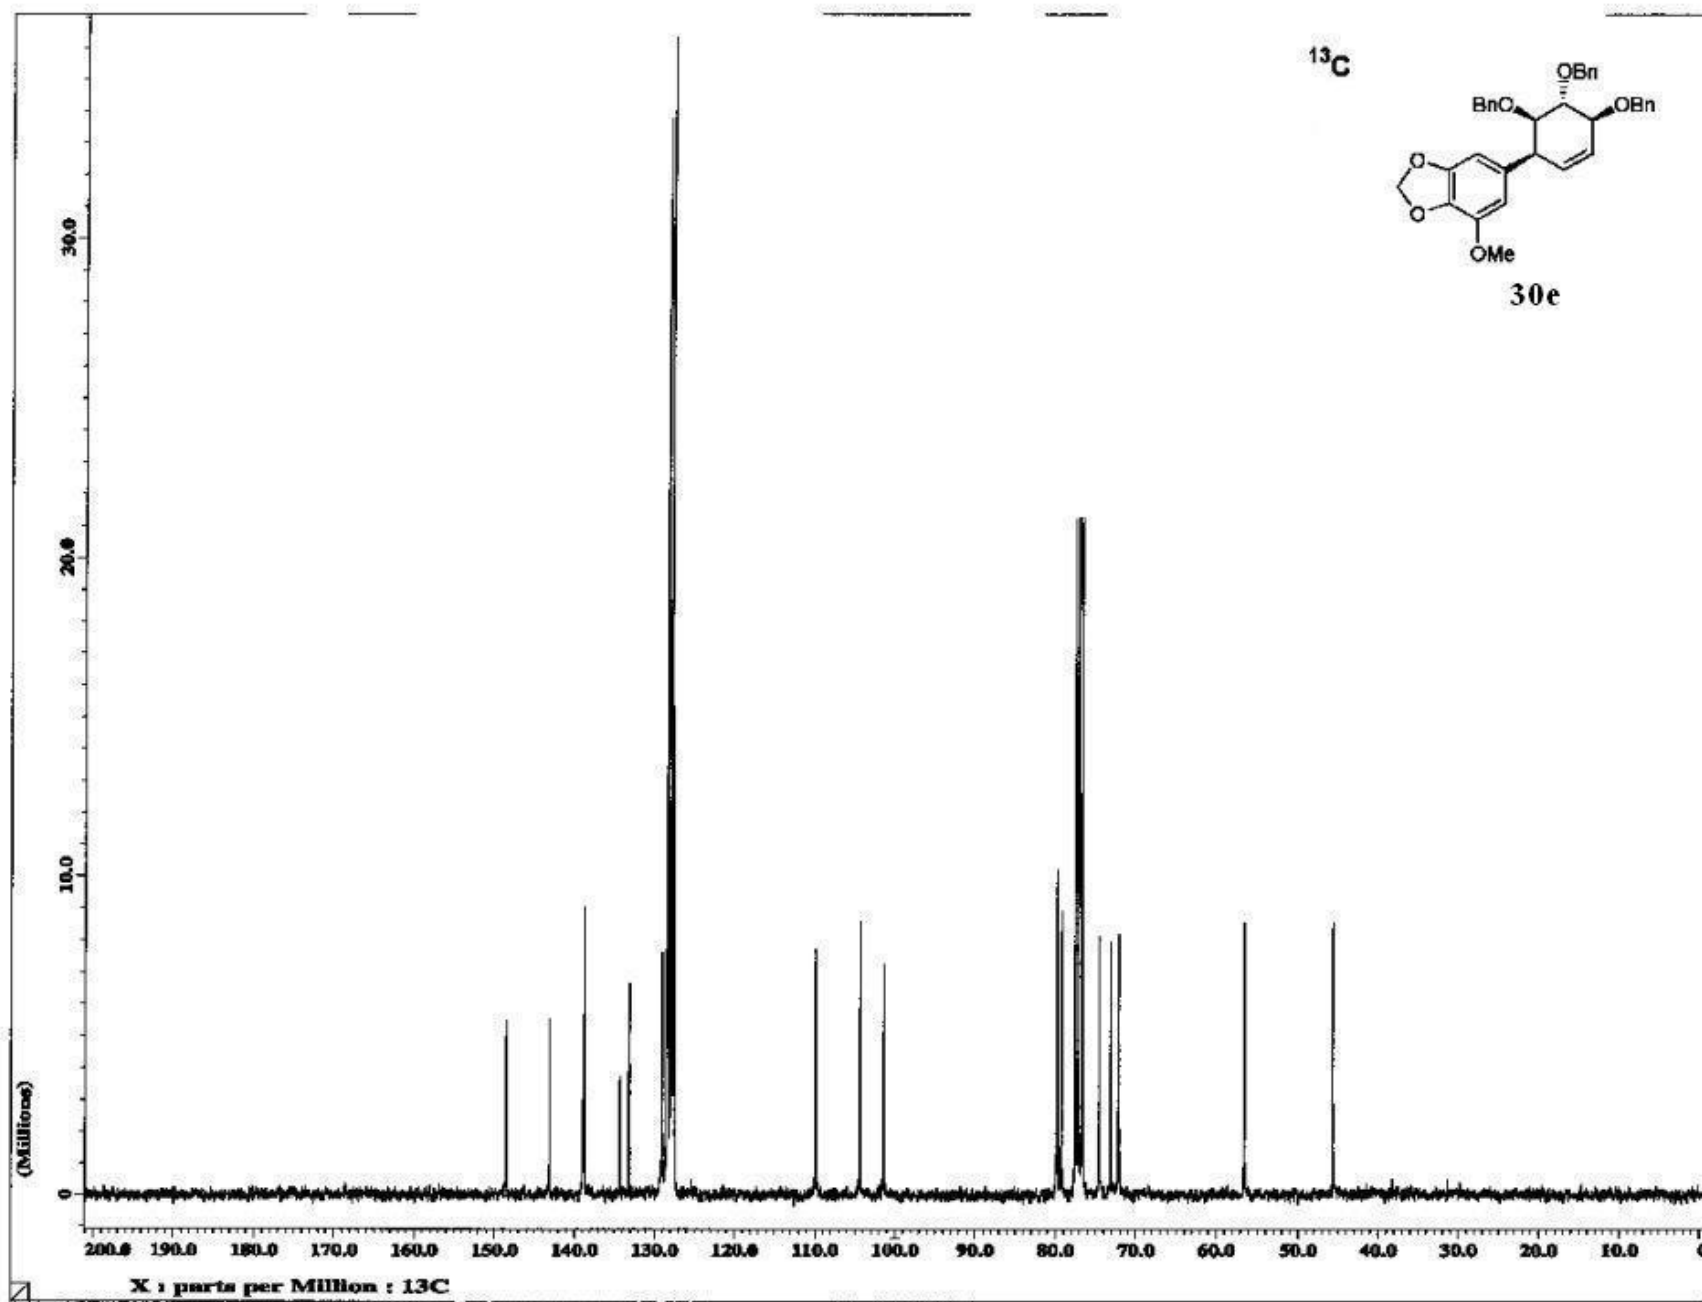

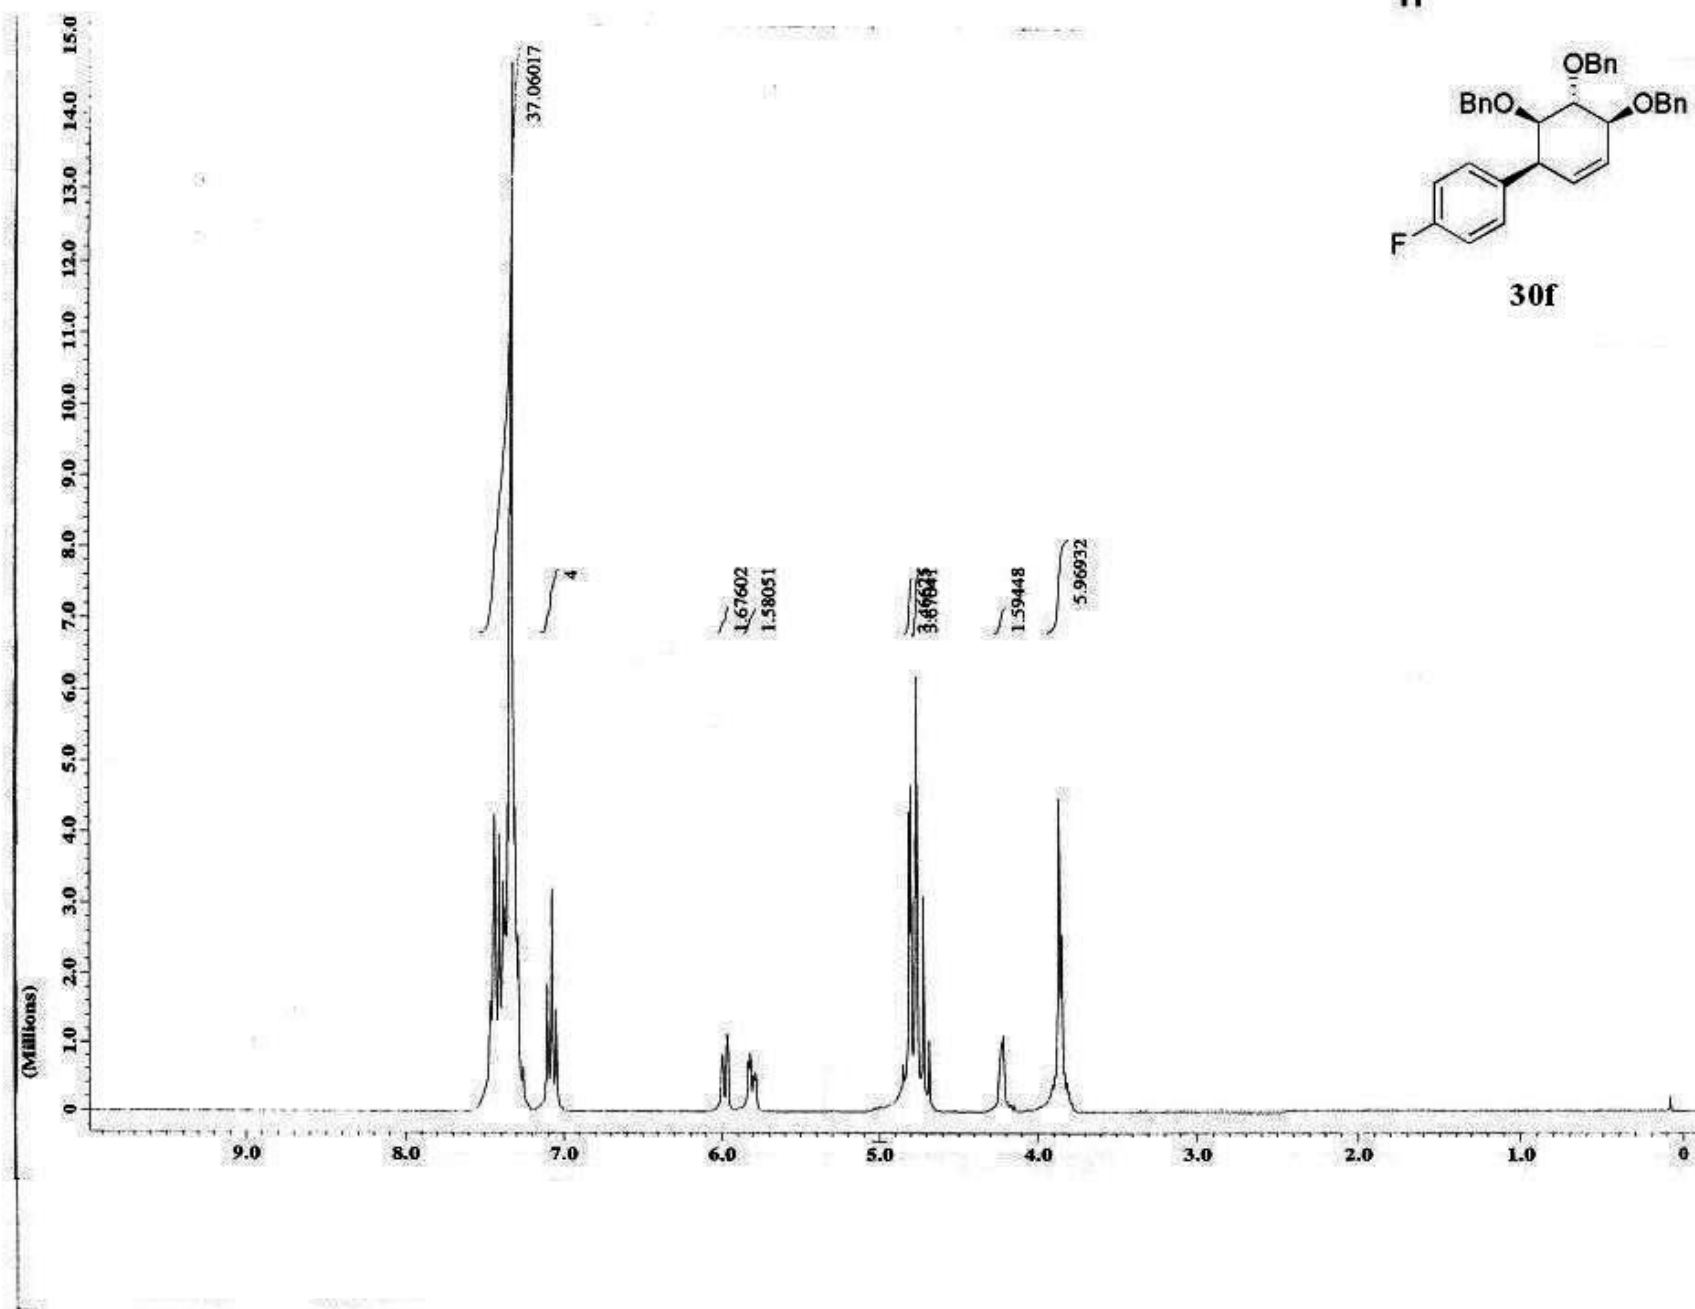

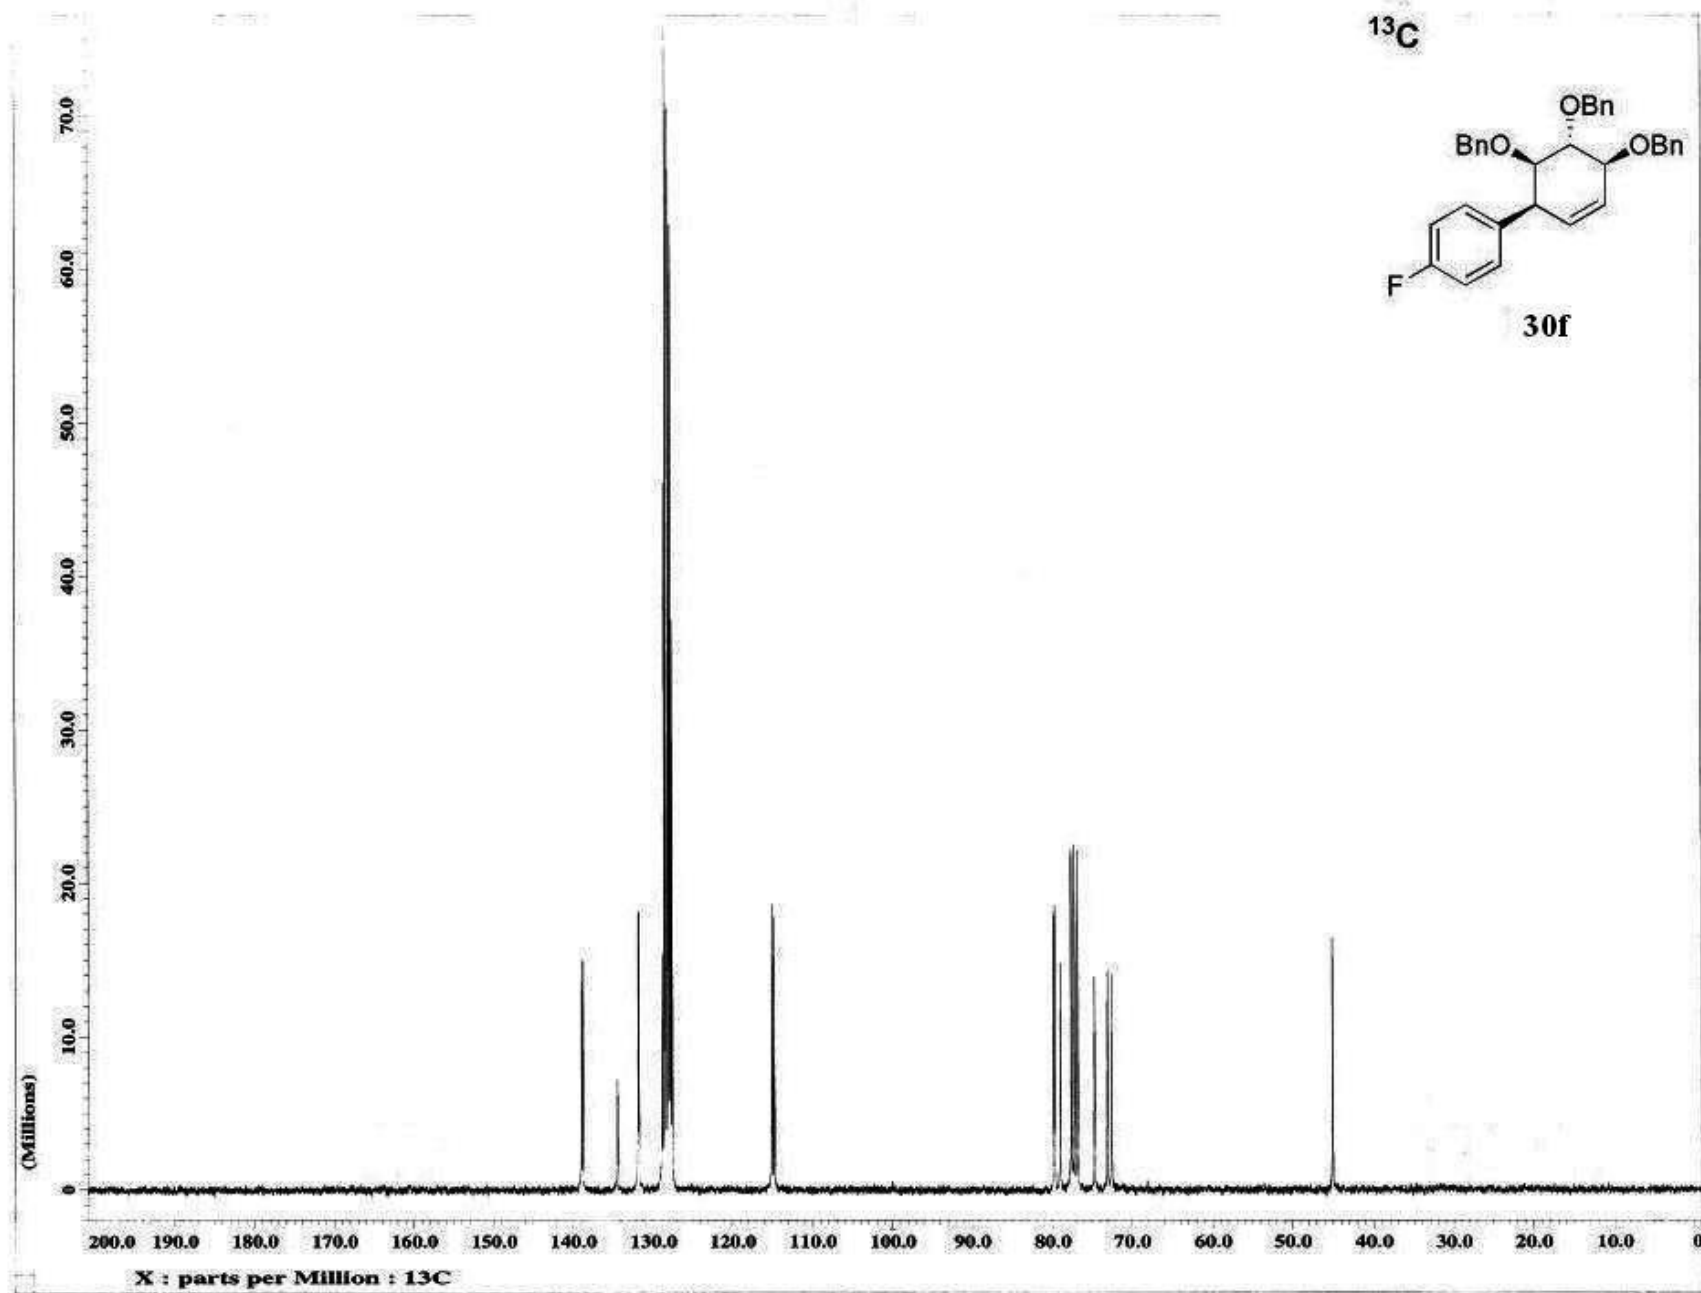

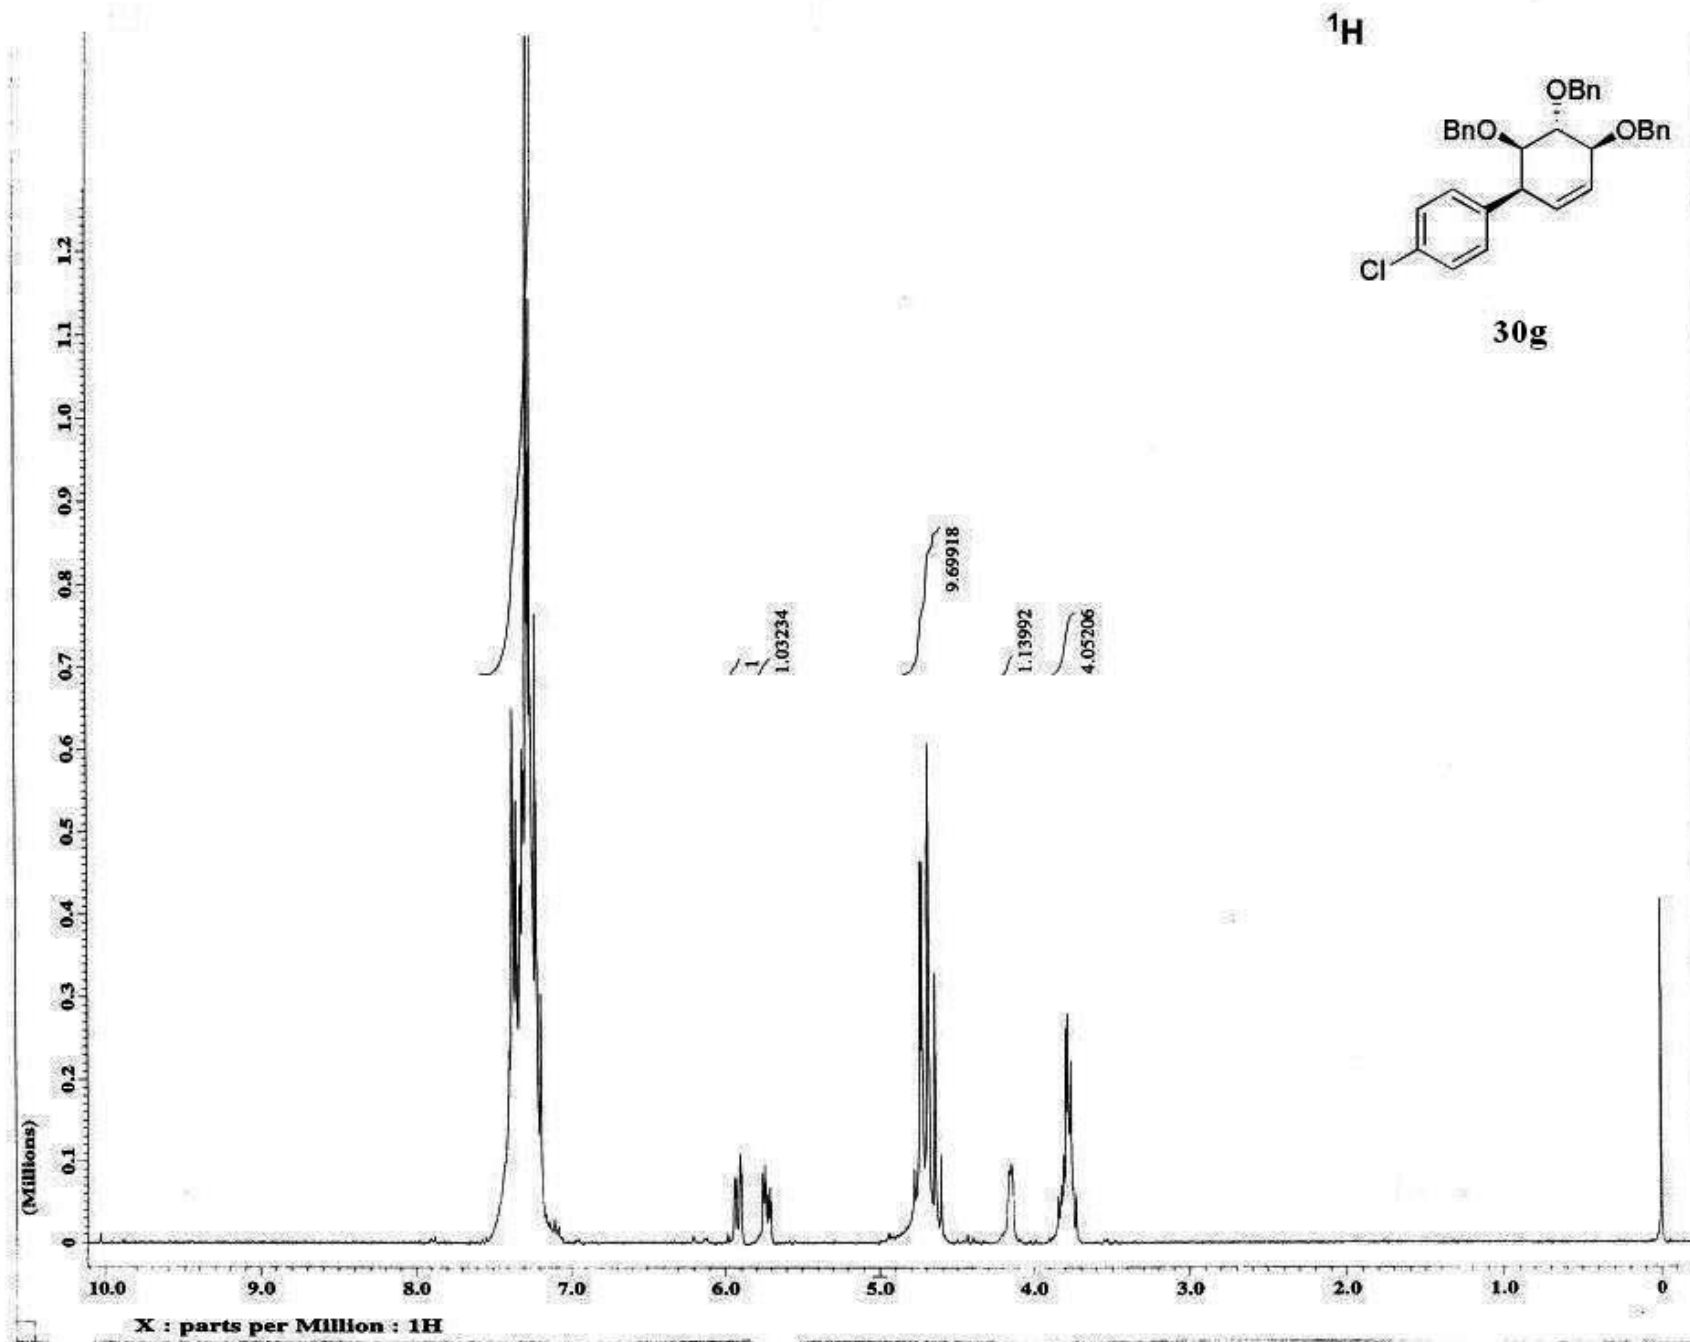



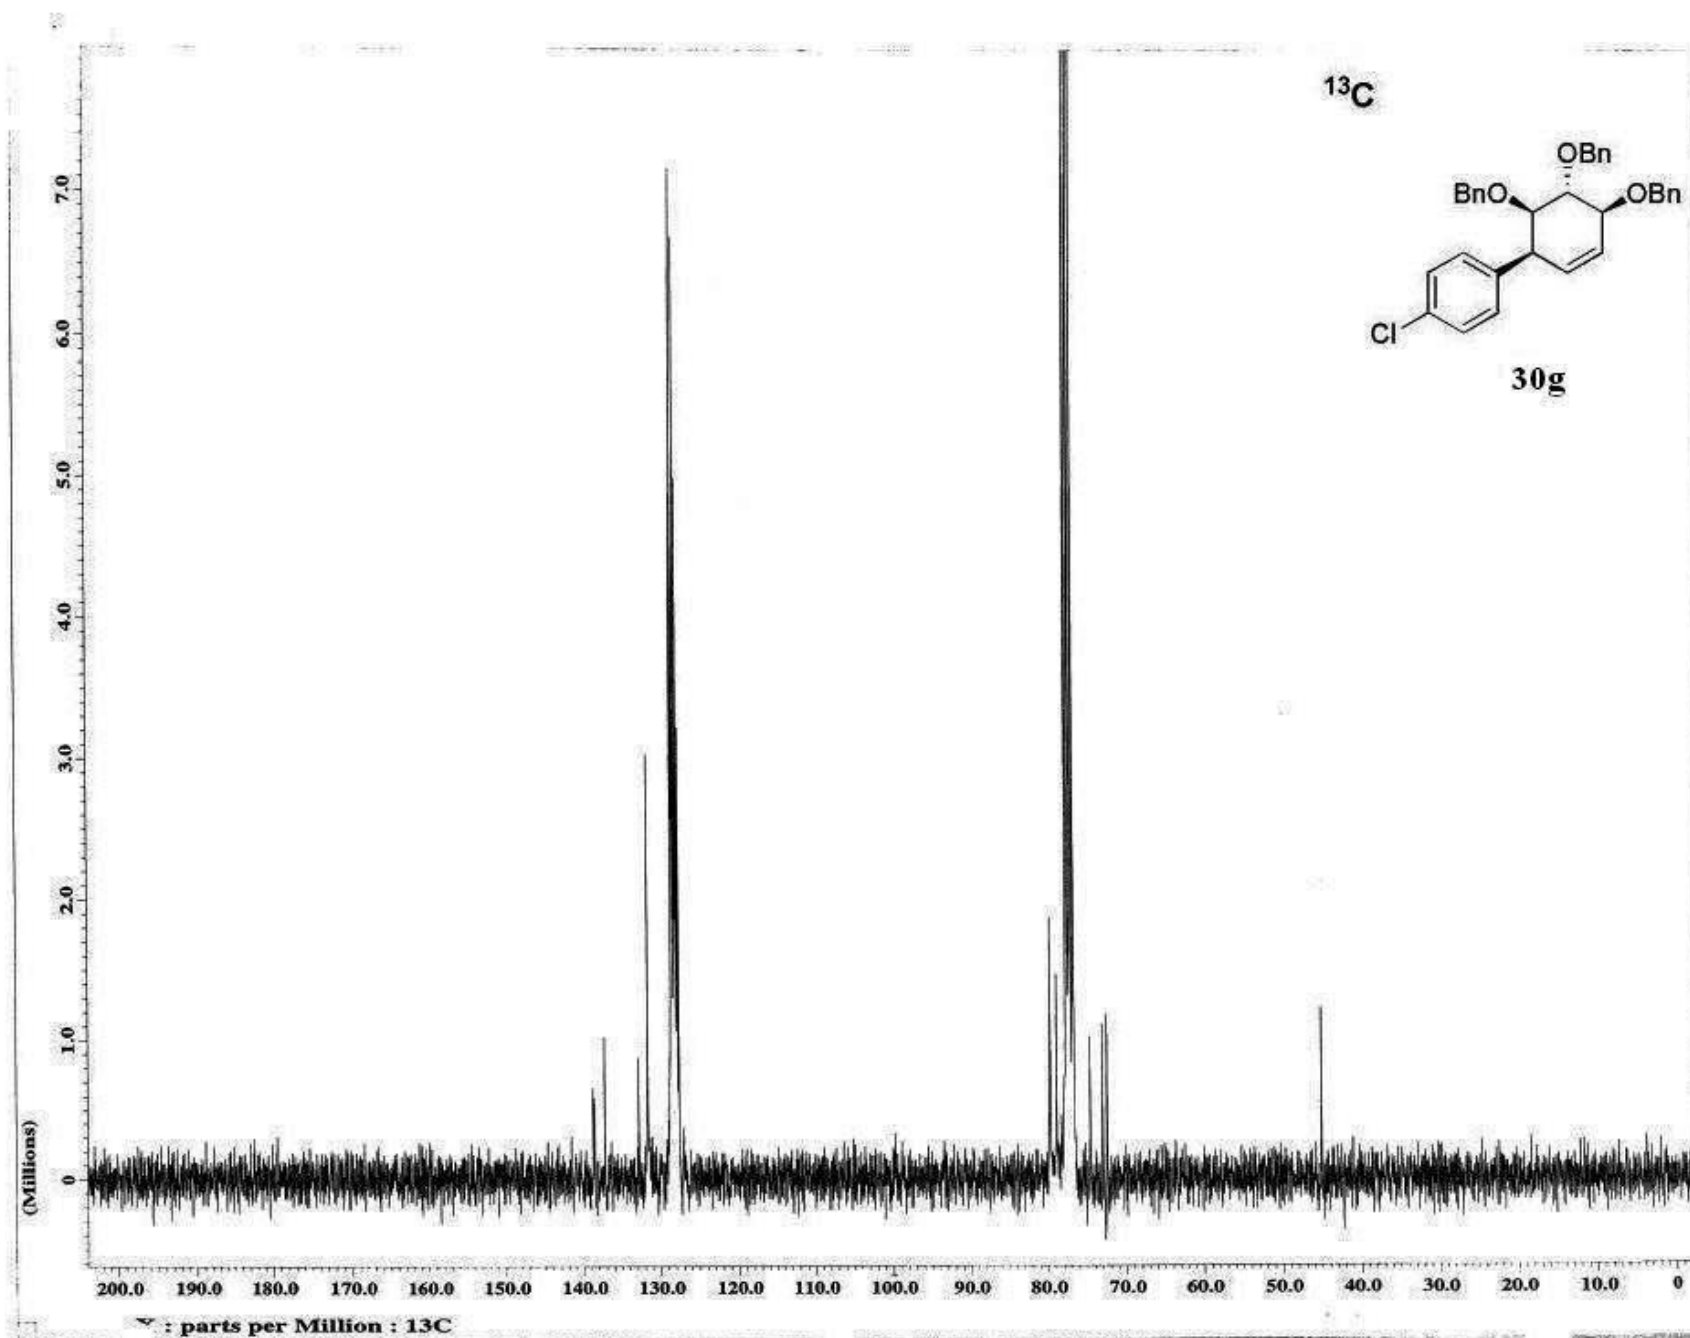

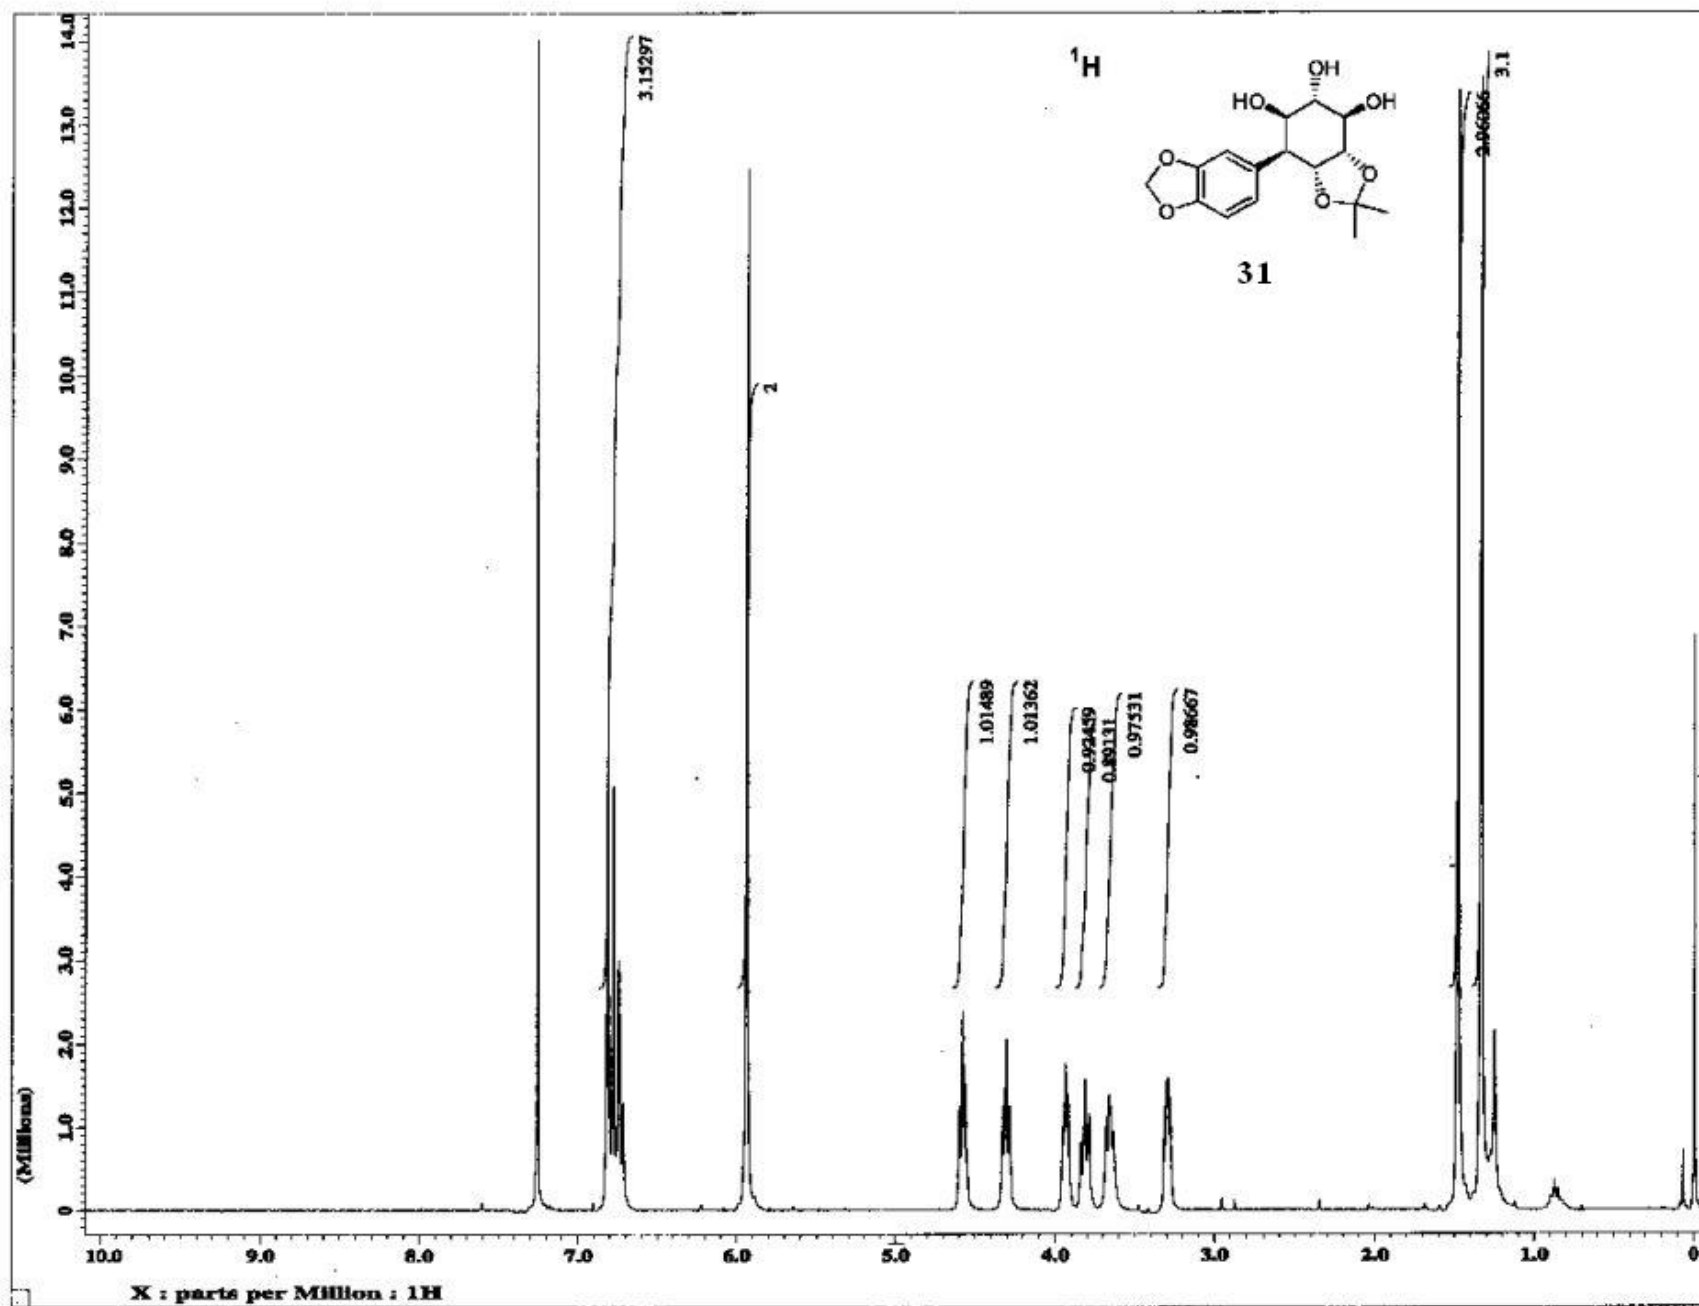

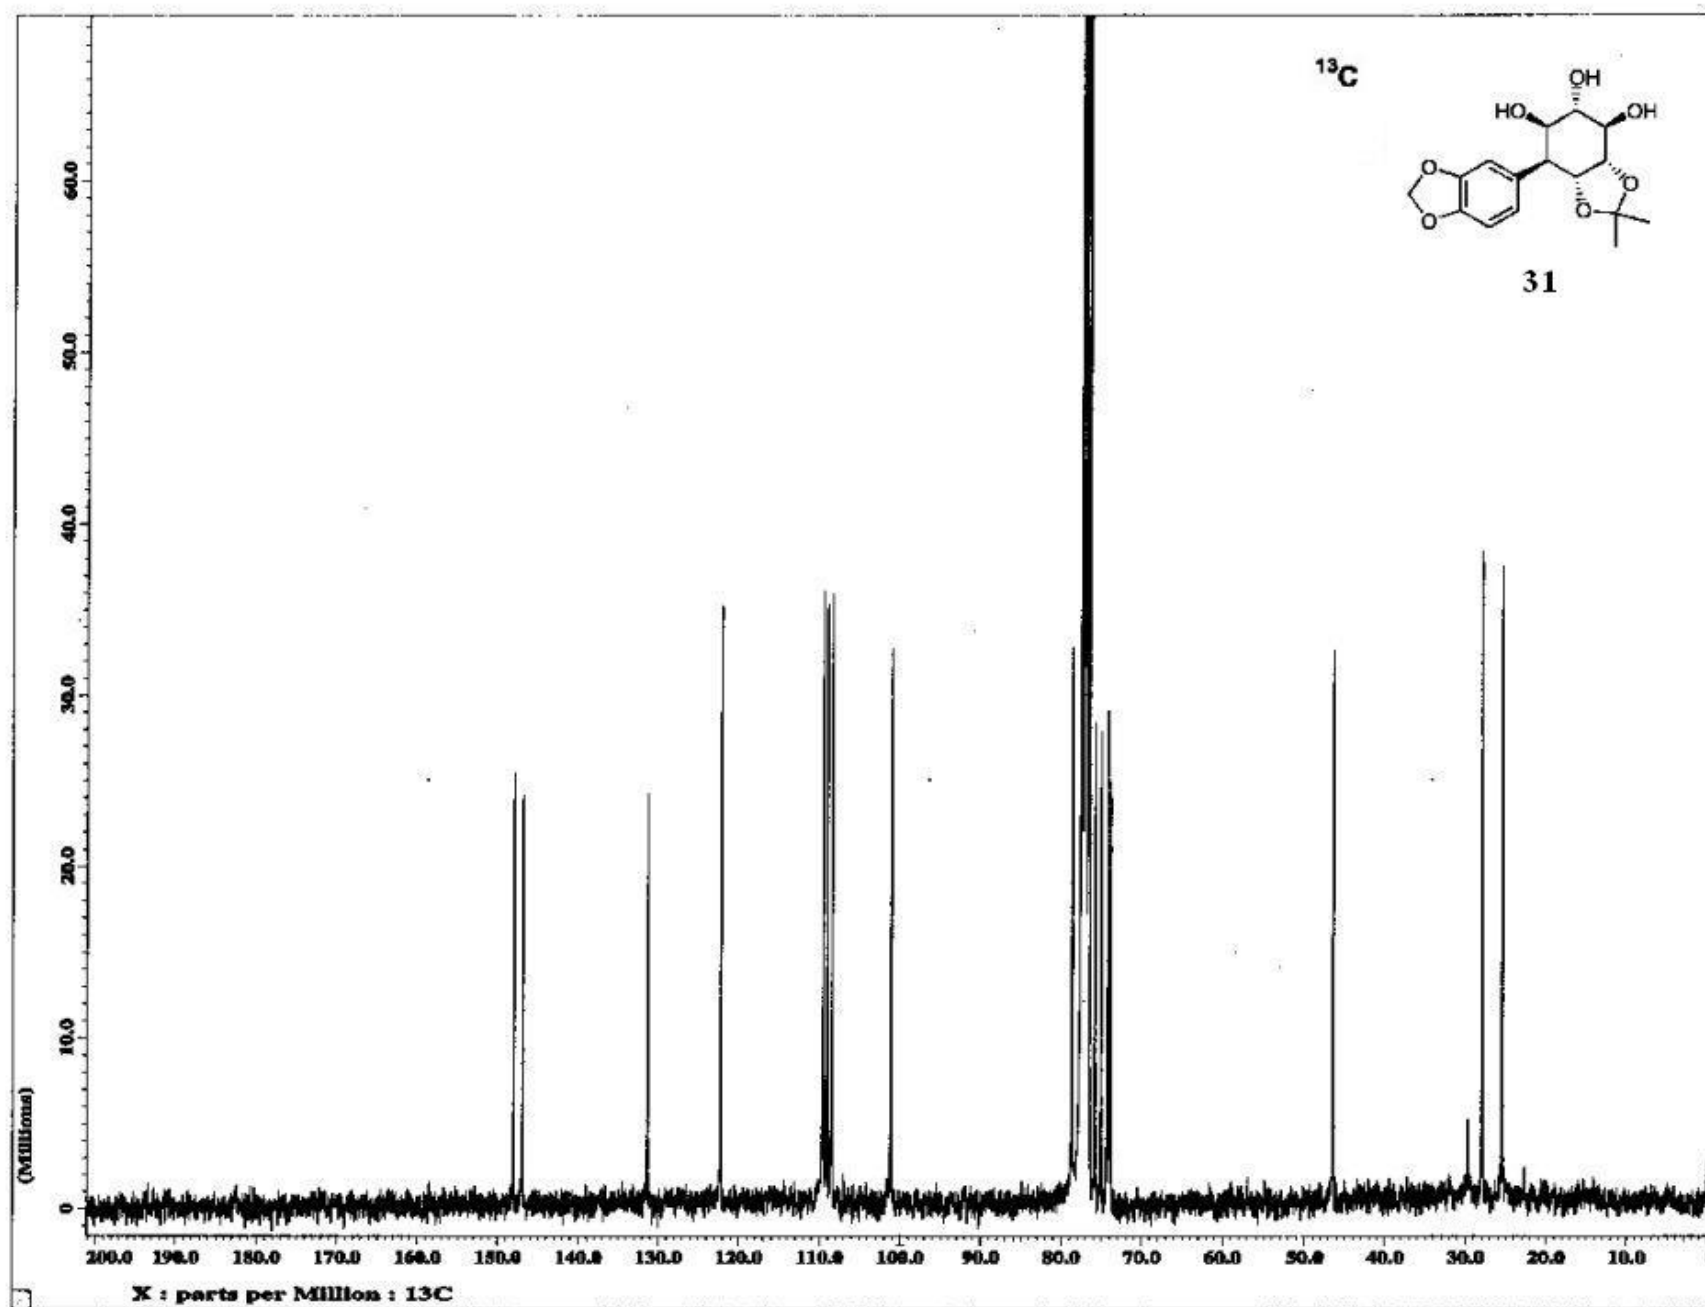

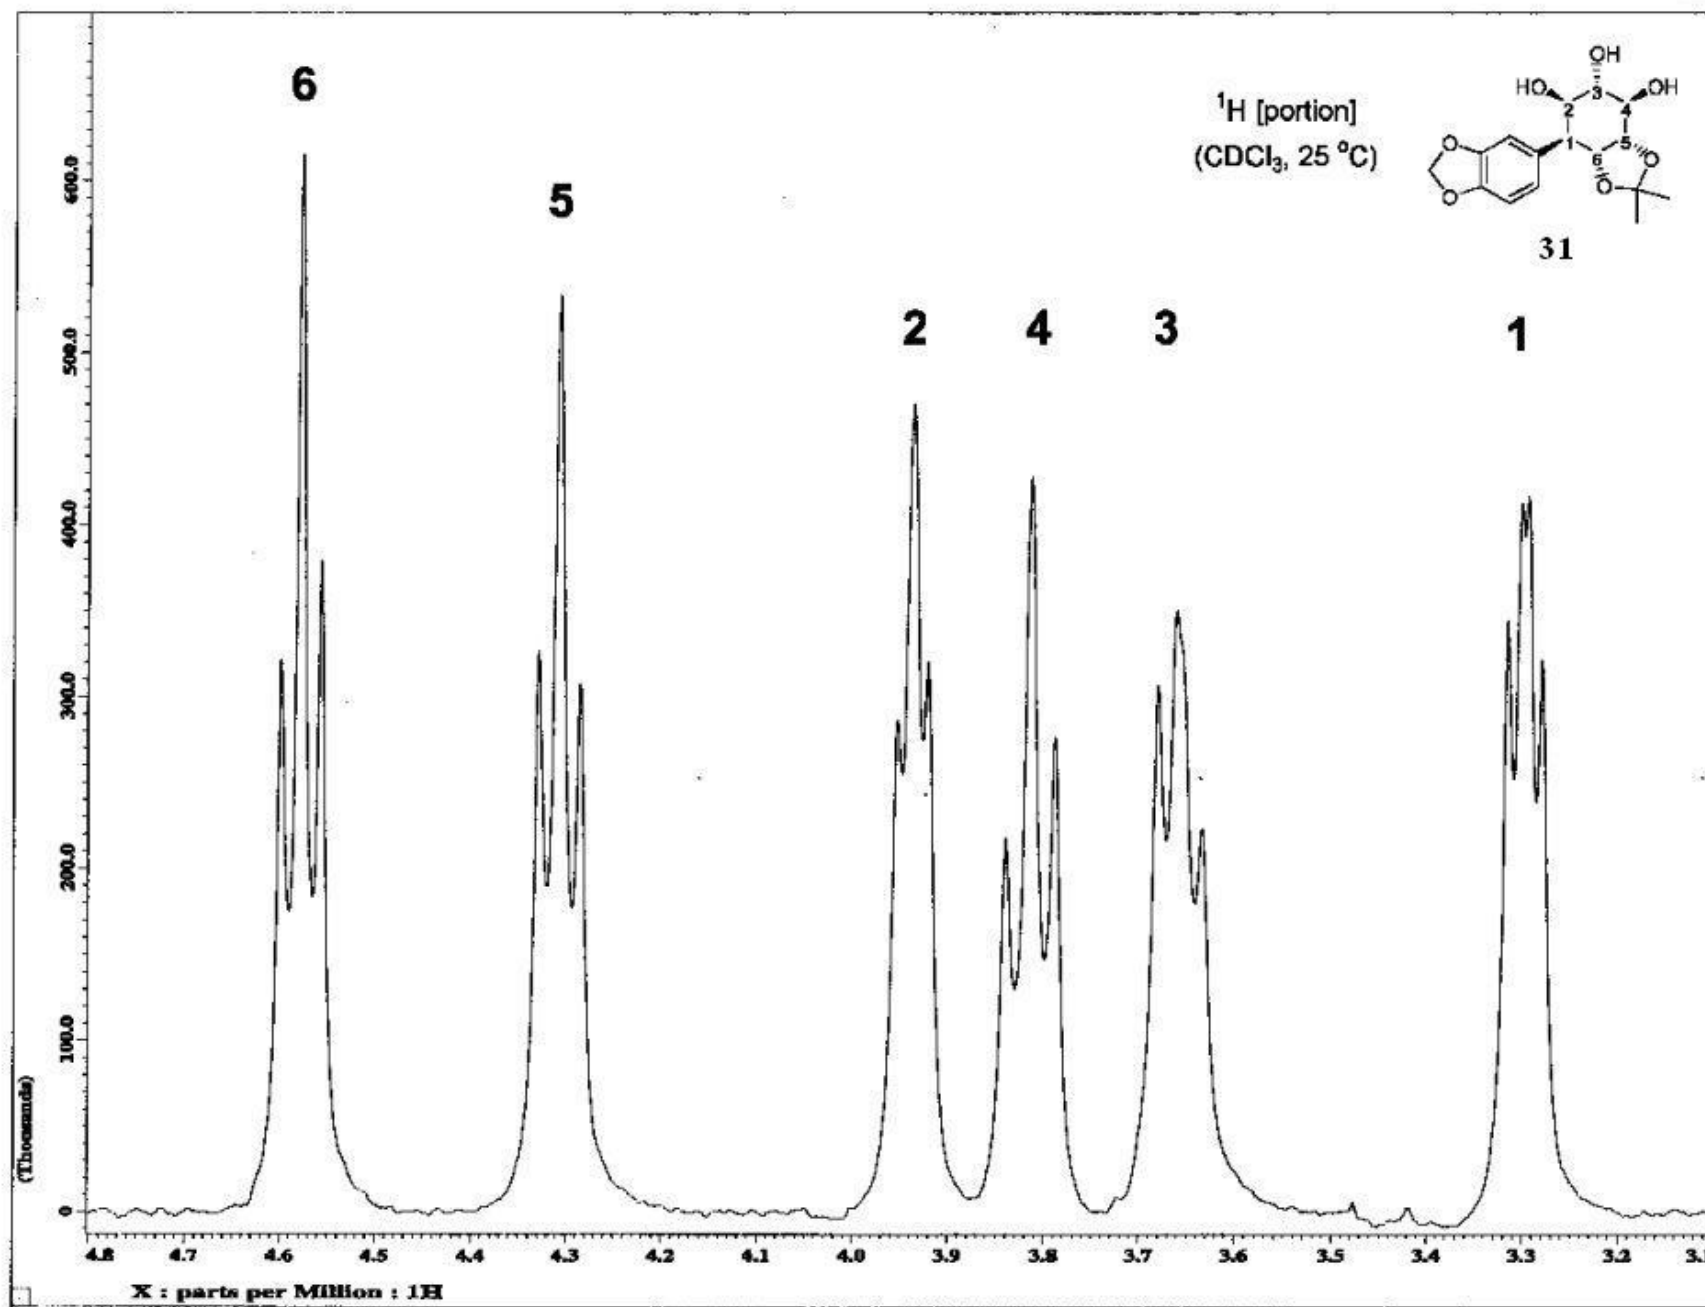

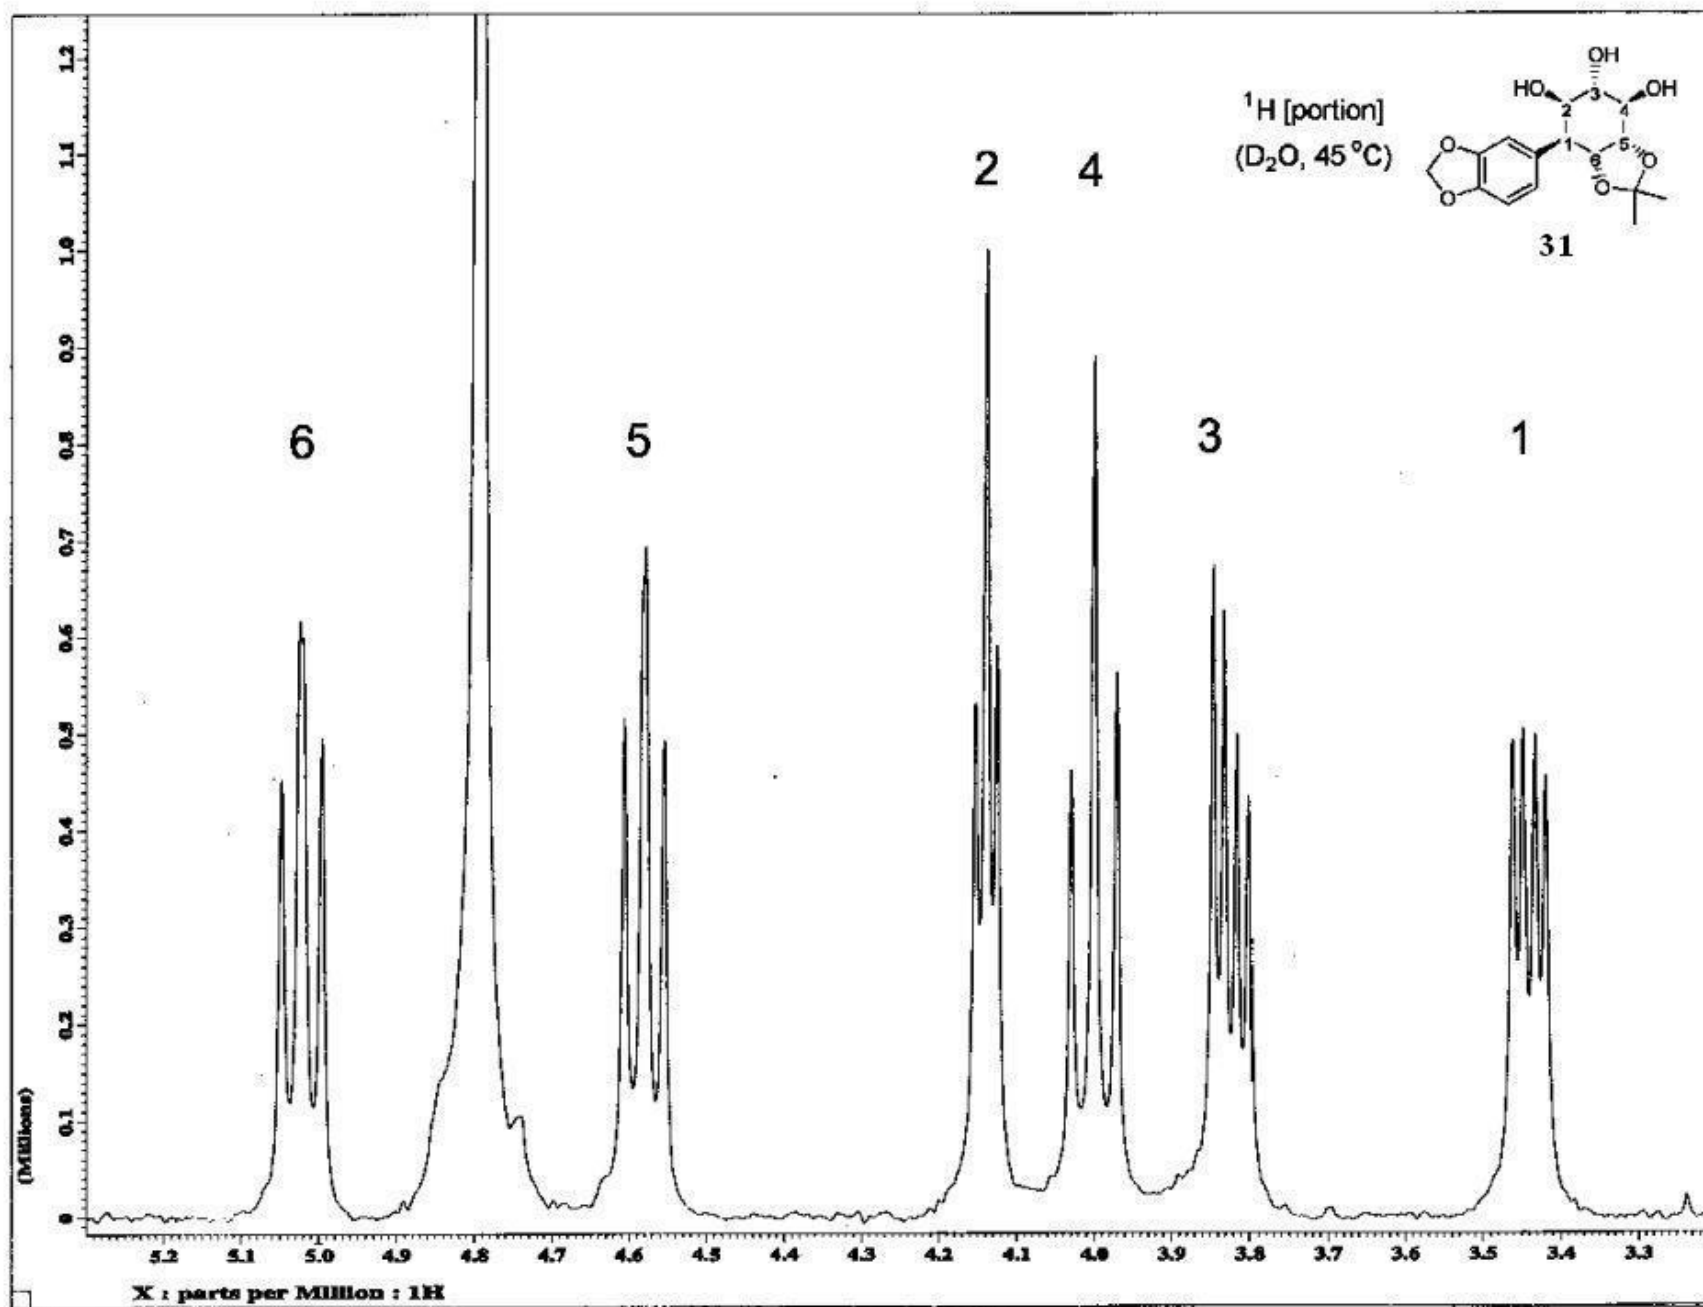

# NOESY

31

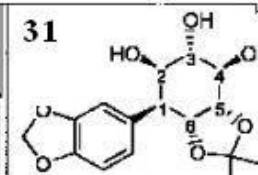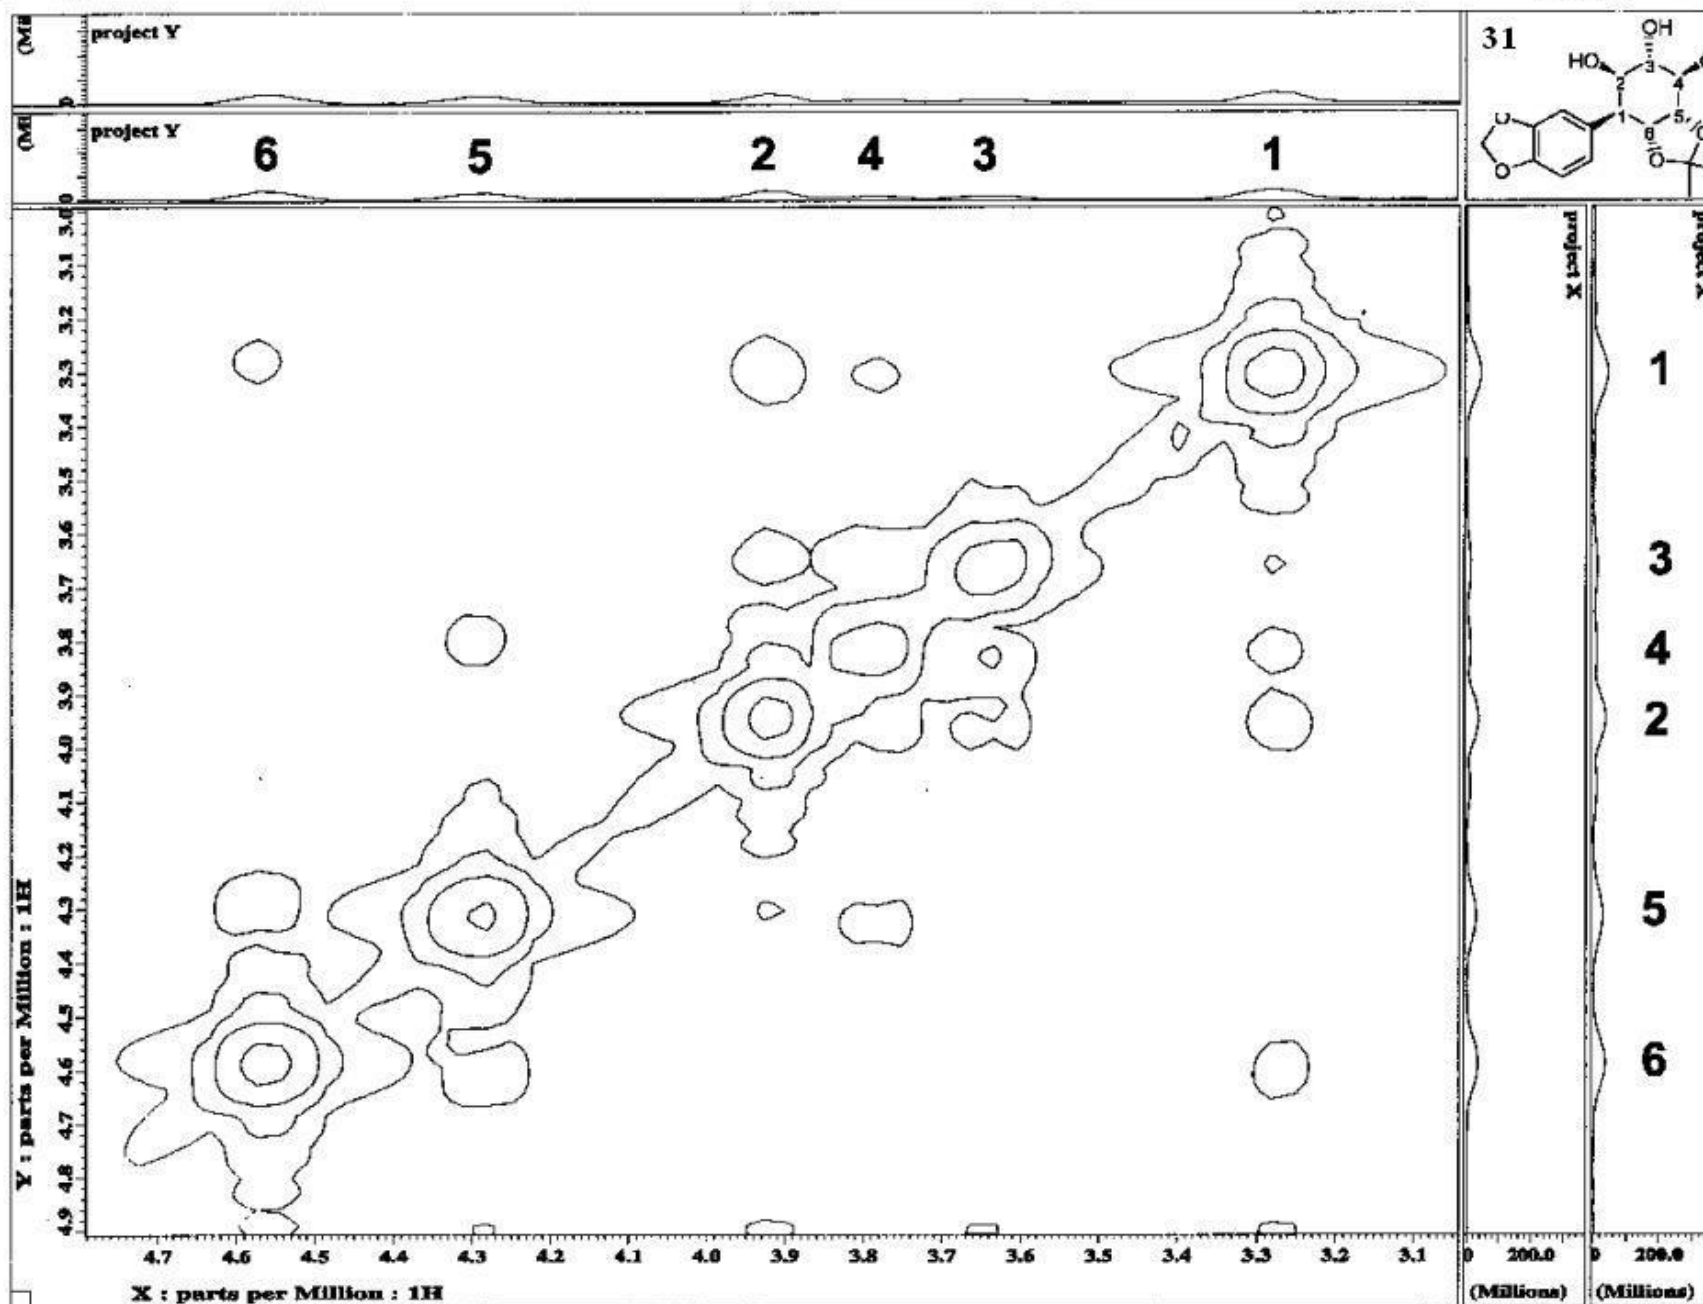

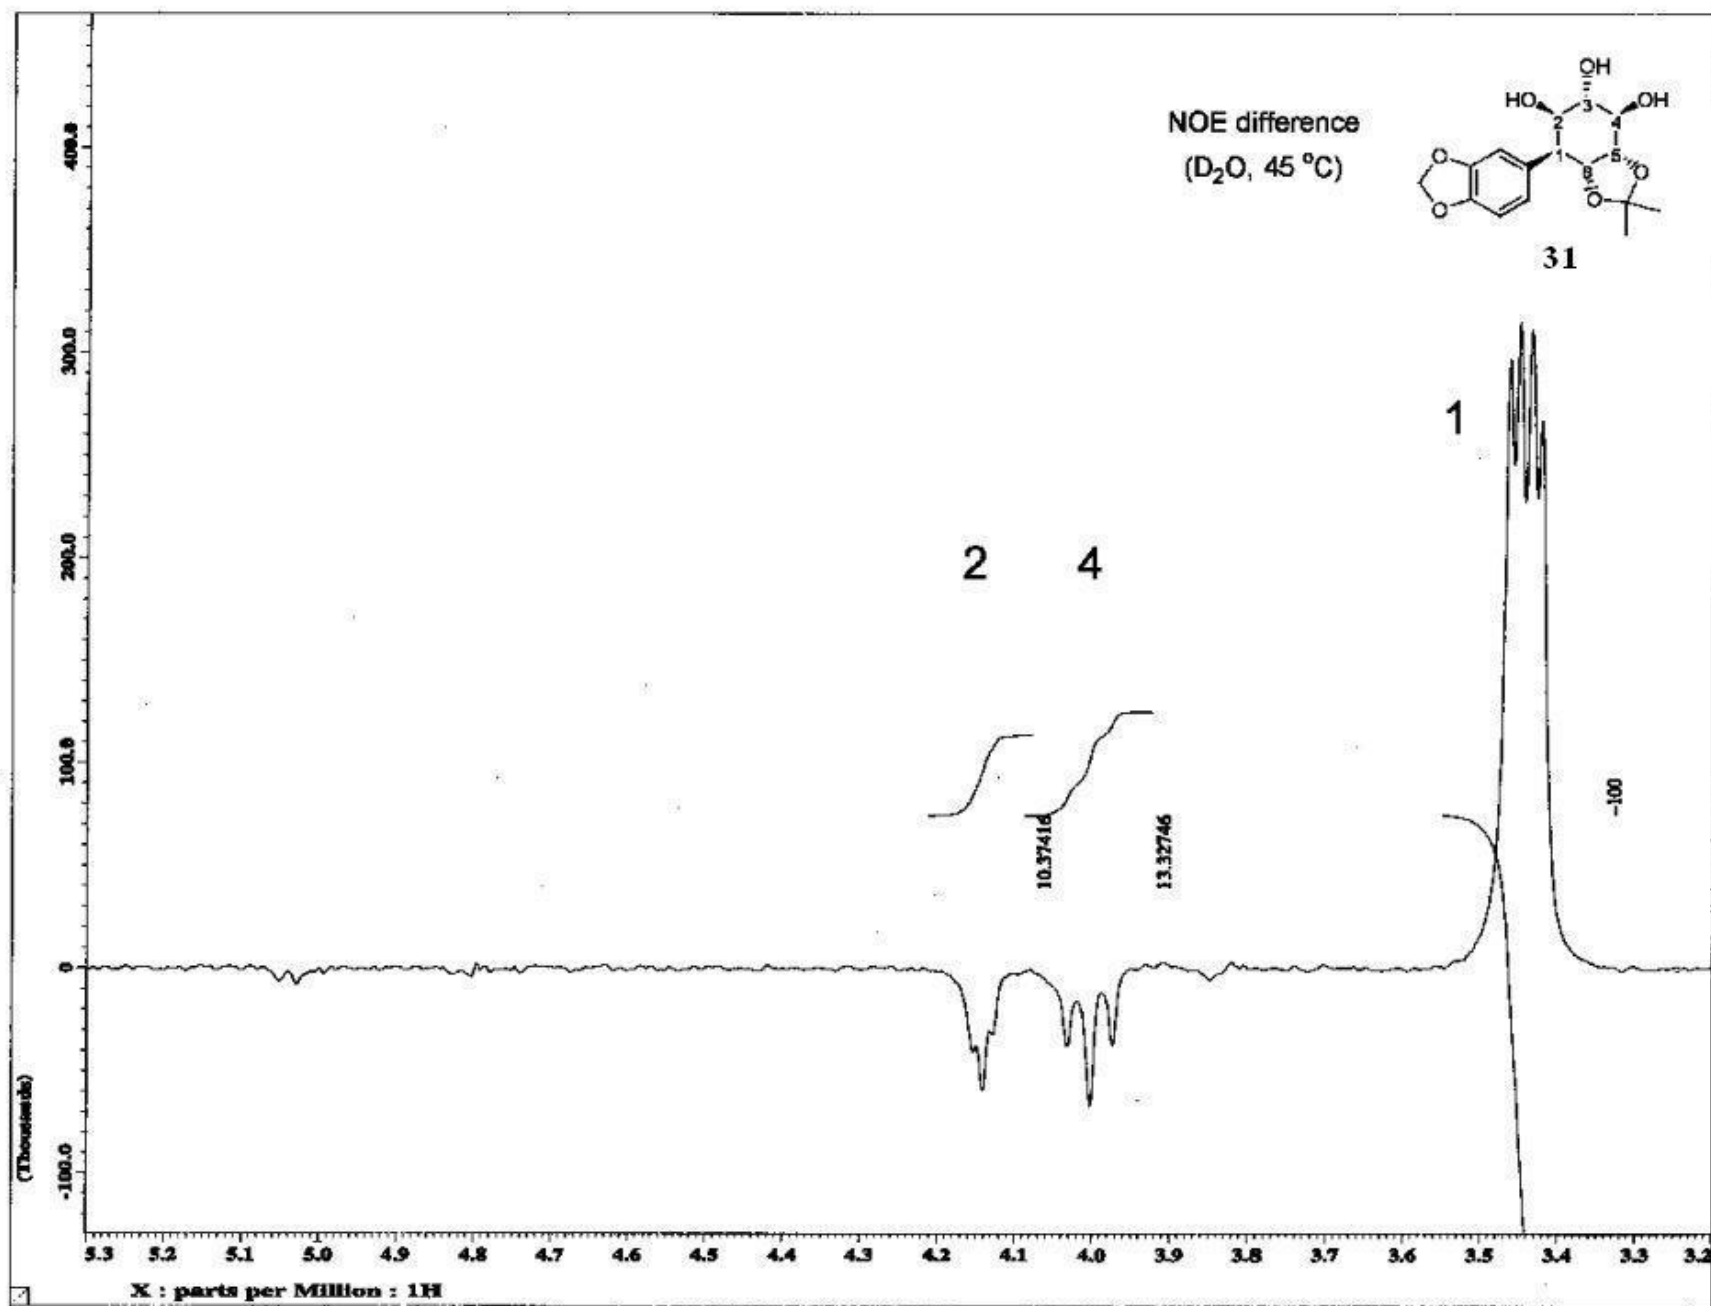

Supplement: Supplementary file 1 [file 4775353]
